# Supplementary material
Source: publisher figshare collection journal article supplement (https://acs.figshare.com/ndownloader/files/3838708)
Supplement: Supplementary file 1 [file 3838708]

data_global
_audit_creation_date                               2015-01-22
_audit_creation_method                            'by CrystalStructure 4.1'
_audit_update_record                               ?

#==============================================================================
# PROCESSING SUMMARY (IUCr Office Use Only)

_journal_date_recd_electronic                      ?
_journal_date_from_coeditor                        ?
_journal_date_accepted                             ?
_journal_coeditor_code                             ?

#==============================================================================
# SUBMISSION DETAILS

_publ_contact_author_name                         'ENTER NAME'
_publ_contact_author_email                        'ENTER EMAIL ADDRESS'
_publ_contact_author_fax                          'ENTER FAX NUMBER'
_publ_contact_author_phone                        'ENTER PHONE NUMBER'
_publ_contact_letter
;
    ENTER TEXT OF LETTER
;
_publ_requested_journal                           'ENTER JOURNAL NAME HERE'
_publ_requested_category
                                               'CHOOSE FI FM FO CI CM CO or AD'
_publ_requested_coeditor_name                      ?

#==============================================================================
# TITLE AND AUTHOR LIST

_publ_section_title
;
    ENTER SECTION TITLE
;
_publ_section_title_footnote
;
    ENTER FOOTNOTE TO TITLE OF PAPER
;
loop_
_publ_author_name
_publ_author_footnote
_publ_author_address
' FIRST AUTHORS NAME '
;
  FIRST AUTHORS FOOTNOTES
;
;
  FIRST AUTHORS ADDRESS
;
_publ_section_synopsis
;
    ENTER SYNOPSIS
;

#==============================================================================
# TEXT

_publ_section_abstract
;
    ENTER ABSTRACT
;
_publ_section_comment
;
    ENTER TEXT
;
_publ_section_references
;
    ENTER OTHER REFERENCES

    Rigaku (2014). CrystalStructure. Version 4.1. 
    Rigaku Corporation, Tokyo, Japan.

    Burla, M. C., Caliandro, R., Camalli, M., Carrozzini, B., 
    Cascarano, G. L., Giacovazzo, C., Mallamo, M., Mazzone, A., 
    Polidori, G. and Spagna, R. 
    (2012). J. Appl. Cryst. 45, 357-361.
    SIR2011

    Rigaku (1995). ABSCOR. 
    Rigaku Corporation, Tokyo, Japan.

;
_publ_section_figure_captions
;
    ENTER FIGURE CAPTIONS
;
_publ_section_exptl_prep
;
    ENTER COMPOUND PREPARATION DETAILS
;
_publ_section_exptl_refinement
;
    ENTER SPECIAL DETAILS OF THE REFINEMENT
;

#==============================================================================
data_150122Nila1

#==============================================================================
# CHEMICAL DATA

_chemical_formula_sum                             'C29 H32 N2 S2'
_chemical_formula_moiety                          'C29 H32 N2 S2'
_chemical_formula_weight                           472.71
_chemical_melting_point                            ?
_chemical_absolute_configuration
                                                 'CHOOSE rm ad rmad syn or unk'

#==============================================================================
# CRYSTAL DATA
_space_group_crystal_system                        monoclinic
_space_group_name_H-M_alt                         'P 1 21 1'
_space_group_name_Hall                            'P 2yb'
_space_group_IT_number                             4
loop_
_symmetry_equiv_pos_site_id
_space_group_symop_operation_xyz
1   '+X,+Y,+Z'
2   '-X,1/2+Y,-Z'
#------------------------------------------------------------------------------
_cell_length_a                                     10.39896(19)
_cell_length_b                                     9.11807(17)
_cell_length_c                                     13.7409(3)
_cell_angle_alpha                                  90.0000
_cell_angle_beta                                   108.291(8)
_cell_angle_gamma                                  90.0000
_cell_volume                                       1237.06(7)
_cell_formula_units_Z                              2
_cell_measurement_reflns_used                      12755
_cell_measurement_theta_min                        3.39
_cell_measurement_theta_max                        68.24
_cell_measurement_temperature                      93
#------------------------------------------------------------------------------
_exptl_crystal_description                         needle
_exptl_crystal_colour                              colorless
_exptl_crystal_size_max                            0.200
_exptl_crystal_size_mid                            0.200
_exptl_crystal_size_min                            0.100
_exptl_crystal_density_diffrn                      1.269
_exptl_crystal_density_meas                        ?
_exptl_crystal_density_method                     'not measured'
_exptl_crystal_F_000                               504.00
_exptl_absorpt_coefficient_mu                      2.087
_exptl_absorpt_correction_type                     multi-scan
_exptl_absorpt_process_details                    'ABSCOR (Rigaku, 1995)'
_exptl_absorpt_correction_T_min                    0.688
_exptl_absorpt_correction_T_max                    0.812

#==============================================================================
# EXPERIMENTAL DATA

_diffrn_ambient_temperature                        93
_diffrn_radiation_type                            'Cu K\a'
_diffrn_radiation_wavelength                       1.54187
_diffrn_measurement_device_type                   'Rigaku R-AXIS RAPID'
_diffrn_measurement_method                         \w
_diffrn_detector_area_resol_mean                   10.000
_diffrn_reflns_number                              14276
_diffrn_reflns_av_R_equivalents                    0.0318
_diffrn_reflns_theta_max                           68.241
_diffrn_reflns_theta_min                           3.388
_diffrn_reflns_theta_full                          67.687
_diffrn_measured_fraction_theta_max                0.999
_diffrn_measured_fraction_theta_full               1.000
_diffrn_reflns_Laue_measured_fraction_max          0.999
_diffrn_reflns_Laue_measured_fraction_full         1.000
_diffrn_reflns_point_group_measured_fraction_max   0.939
_diffrn_reflns_point_group_measured_fraction_full  0.941
_diffrn_reflns_limit_h_min                        -12
_diffrn_reflns_limit_h_max                         12
_diffrn_reflns_limit_k_min                        -10
_diffrn_reflns_limit_k_max                         10
_diffrn_reflns_limit_l_min                        -16
_diffrn_reflns_limit_l_max                         16
_diffrn_standards_number                           0
_diffrn_standards_interval_count                   .
_diffrn_standards_decay_%                          ?

#==============================================================================
# REFINEMENT DATA

_refine_special_details
;
    Refinement was performed using all reflections. The weighted 
    R-factor (wR) and goodness of fit (S) are based on F^2^.
    R-factor (gt) are based on F. The threshold expression of
    F^2^ > 2.0 sigma(F^2^) is used only for calculating R-factor (gt).
;
_reflns_number_total                               4261
_reflns_number_gt                                  4103
_reflns_threshold_expression                       F^2^>2.0\s(F^2^)
_refine_ls_structure_factor_coef                   Fsqd
_refine_ls_R_factor_all                            0.0334
_refine_ls_R_factor_gt                             0.0313
_refine_ls_wR_factor_ref                           0.0911
_refine_ls_wR_factor_gt                            0.0839
_refine_ls_number_restraints                       1
_refine_ls_hydrogen_treatment                      constr
_refine_ls_number_reflns                           4261
_refine_ls_number_parameters                       298
_refine_ls_goodness_of_fit_ref                     1.110
_refine_ls_weighting_scheme                        calc
_refine_ls_weighting_details
           'w = 1/[\s^2^(Fo^2^)+(0.0434P)^2^+0.5239P] where P=(Fo^2^+2Fc^2^)/3'
_atom_sites_solution_hydrogens                     geom
_atom_sites_solution_primary                       direct
_atom_sites_solution_secondary                     difmap
_refine_ls_shift/su_max                            0.000
_refine_diff_density_max                           0.31
_refine_diff_density_min                          -0.22
_refine_ls_extinction_method                       none
_refine_ls_extinction_coef                         ?
_refine_ls_abs_structure_details
;
 Flack x determined using 1710 quotients [(I+)-(I-)]/[(I+)+(I-)]
 (Parsons and Flack (2004), Acta Cryst. A60, s61).
;
_refine_ls_abs_structure_Flack                    -0.004(6)

loop_
_atom_type_symbol
_atom_type_description
_atom_type_scat_dispersion_real
_atom_type_scat_dispersion_imag
_atom_type_scat_source
  'C' 'C'  0.0181 0.0091 
;
International Tables for Crystallography
(Vol. C, Tables 4.2.6.8 and 6.1.1.4)
;
  'H' 'H'  0.0000 0.0000 
;
International Tables for Crystallography
(Vol. C, Table 6.1.1.4)
;
  'N' 'N'  0.0311 0.0180 
;
International Tables for Crystallography
(Vol. C, Tables 4.2.6.8 and 6.1.1.4)
;
  'S' 'S'  0.3331 0.5567 
;
International Tables for Crystallography
(Vol. C, Tables 4.2.6.8 and 6.1.1.4)
;

#==============================================================================
# ATOMIC COORDINATES AND THERMAL PARAMETERS

loop_
_atom_site_label
_atom_site_type_symbol
_atom_site_fract_x
_atom_site_fract_y
_atom_site_fract_z
_atom_site_U_iso_or_equiv
_atom_site_adp_type
_atom_site_occupancy
_atom_site_site_symmetry_multiplicity
_atom_site_calc_flag
_atom_site_refinement_flags
_atom_site_disorder_assembly
_atom_site_disorder_group
 S1 S 0.36562(8) 0.47080(9) 0.07953(6) 0.02199(19) Uani 1 2 d . . .
 S2 S -0.01298(8) 0.33464(10) 0.27934(6) 0.0257(2) Uani 1 2 d . . .
 N1 N -0.1255(3) 0.5824(3) 0.1939(2) 0.0197(6) Uani 1 2 d . . .
 N30 N 0.4201(3) 0.3000(3) 0.24553(19) 0.0172(6) Uani 1 2 d . . .
 C2 C 0.5635(3) 0.0796(4) 0.2413(2) 0.0183(7) Uani 1 2 d . . .
 C3 C 0.2308(3) 0.5537(4) 0.2946(2) 0.0157(6) Uani 1 2 d . . .
 C4 C 0.4427(3) 0.1758(4) 0.1831(2) 0.0180(7) Uani 1 2 d . . .
 C5 C 0.6901(3) 0.1109(4) 0.2308(3) 0.0234(7) Uani 1 2 d . . .
 C6 C 0.6640(3) -0.1258(4) 0.3490(3) 0.0223(7) Uani 1 2 d . . .
 C7 C 0.2072(3) 0.8281(4) 0.3193(2) 0.0175(6) Uani 1 2 d . . .
 C8 C 0.5520(3) -0.0400(4) 0.3003(2) 0.0198(6) Uani 1 2 d . . .
 C9 C 0.3147(3) 0.0848(4) 0.1350(2) 0.0190(7) Uani 1 2 d . . .
 C10 C -0.0173(3) 0.4976(4) 0.2201(2) 0.0184(7) Uani 1 2 d . . .
 C11 C 0.2122(3) 0.6852(4) 0.3570(2) 0.0165(6) Uani 1 2 d . . .
 C12 C 0.7889(3) -0.0947(4) 0.3372(3) 0.0251(7) Uani 1 2 d . . .
 C13 C 0.1089(3) 0.5451(4) 0.1953(2) 0.0181(6) Uani 1 2 d . . .
 C14 C 0.3249(3) -0.0395(4) 0.0785(2) 0.0234(7) Uani 1 2 d . . .
 C15 C -0.1359(3) 0.7172(4) 0.1342(3) 0.0230(7) Uani 1 2 d . . .
 C16 C 0.0746(3) 0.0406(4) 0.0915(2) 0.0240(7) Uani 1 2 d . . .
 C17 C 0.4862(3) 0.5394(4) 0.3752(2) 0.0204(7) Uani 1 2 d . . .
 C18 C 0.4779(3) 0.3931(4) 0.4269(2) 0.0215(7) Uani 1 2 d . . .
 C19 C 0.1768(3) 0.9462(4) 0.3720(2) 0.0202(7) Uani 1 2 d . . .
 C20 C 0.1883(3) 0.6644(4) 0.4503(2) 0.0213(7) Uani 1 2 d . . .
 C21 C 0.3856(3) 0.4321(3) 0.2031(2) 0.0155(6) Uani 1 2 d . . .
 C22 C 0.0860(4) -0.0814(4) 0.0361(2) 0.0272(8) Uani 1 2 d . . .
 C23 C 0.1887(3) 0.1245(4) 0.1412(2) 0.0201(7) Uani 1 2 d . . .
 C24 C 0.3698(3) 0.5547(4) 0.2741(2) 0.0168(6) Uani 1 2 d . . .
 C25 C 0.4187(4) 0.2702(4) 0.3507(3) 0.0241(7) Uani 1 2 d . . .
 C26 C -0.2510(3) 0.5363(4) 0.2128(3) 0.0265(7) Uani 1 2 d . . .
 C27 C 0.8009(3) 0.0236(4) 0.2781(3) 0.0267(8) Uani 1 2 d . . .
 C28 C 0.1526(3) 0.9227(4) 0.4654(3) 0.0245(8) Uani 1 2 d . . .
 C29 C 0.2117(4) -0.1222(4) 0.0292(3) 0.0270(8) Uani 1 2 d . . .
 C31 C 0.1593(3) 0.7828(4) 0.5041(3) 0.0250(8) Uani 1 2 d . . .
 H3 H 0.22824 0.46385 0.33567 0.0189 Uiso 1 2 calc R . .
 H4 H 0.46709 0.22046 0.12476 0.0216 Uiso 1 2 calc R . .
 H5 H 0.70005 0.19258 0.19085 0.0280 Uiso 1 2 calc R . .
 H6 H 0.65519 -0.20603 0.39059 0.0268 Uiso 1 2 calc R . .
 H7 H 0.22492 0.84481 0.25643 0.0210 Uiso 1 2 calc R . .
 H8 H 0.46639 -0.06362 0.30741 0.0238 Uiso 1 2 calc R . .
 H12 H 0.86533 -0.15435 0.3694 0.0301 Uiso 1 2 calc R . .
 H13A H 0.09344 0.64225 0.16151 0.0217 Uiso 1 2 calc R . .
 H13B H 0.1286 0.47392 0.14747 0.0217 Uiso 1 2 calc R . .
 H14 H 0.4107 -0.06757 0.0738 0.0281 Uiso 1 2 calc R . .
 H15A H -0.22485 0.7621 0.12381 0.0276 Uiso 1 2 calc R . .
 H15B H -0.06479 0.78569 0.17135 0.0276 Uiso 1 2 calc R . .
 H15C H -0.12504 0.69415 0.0676 0.0276 Uiso 1 2 calc R . .
 H16 H -0.01146 0.06808 0.0961 0.0288 Uiso 1 2 calc R . .
 H17A H 0.5739 0.54613 0.36146 0.0245 Uiso 1 2 calc R . .
 H17B H 0.48173 0.62073 0.4218 0.0245 Uiso 1 2 calc R . .
 H18A H 0.56989 0.3645 0.47028 0.0258 Uiso 1 2 calc R . .
 H18B H 0.4212 0.40548 0.47231 0.0258 Uiso 1 2 calc R . .
 H19 H 0.17252 1.04257 0.34482 0.0243 Uiso 1 2 calc R . .
 H20 H 0.19177 0.56824 0.4776 0.0255 Uiso 1 2 calc R . .
 H22 H 0.0079 -0.13794 0.0025 0.0326 Uiso 1 2 calc R . .
 H23 H 0.18007 0.20881 0.17931 0.0241 Uiso 1 2 calc R . .
 H24 H 0.37988 0.65084 0.24227 0.0202 Uiso 1 2 calc R . .
 H25A H 0.4706 0.17917 0.37546 0.0289 Uiso 1 2 calc R . .
 H25B H 0.32406 0.2525 0.34881 0.0289 Uiso 1 2 calc R . .
 H26A H -0.32006 0.61247 0.18851 0.0318 Uiso 1 2 calc R . .
 H26B H -0.28329 0.44452 0.17616 0.0318 Uiso 1 2 calc R . .
 H26C H -0.23315 0.52103 0.28649 0.0318 Uiso 1 2 calc R . .
 H27 H 0.88623 0.04548 0.26985 0.0320 Uiso 1 2 calc R . .
 H28 H 0.13162 1.00294 0.50184 0.0294 Uiso 1 2 calc R . .
 H29 H 0.21972 -0.20646 -0.00916 0.0323 Uiso 1 2 calc R . .
 H31 H 0.14414 0.76682 0.56798 0.0300 Uiso 1 2 calc R . .


loop_
_atom_site_aniso_label
_atom_site_aniso_U_11
_atom_site_aniso_U_22
_atom_site_aniso_U_33
_atom_site_aniso_U_12
_atom_site_aniso_U_13
_atom_site_aniso_U_23
 S1 0.0271(4) 0.0217(4) 0.0188(4) 0.0027(3) 0.0095(3) 0.0025(3)
 S2 0.0221(4) 0.0222(4) 0.0354(5) -0.0034(3) 0.0126(3) 0.0054(4)
 N1 0.0159(13) 0.0221(15) 0.0215(13) -0.0026(11) 0.0065(11) -0.0030(11)
 N30 0.0187(13) 0.0144(15) 0.0190(13) -0.0014(11) 0.0066(10) -0.0021(11)
 C2 0.0163(15) 0.0165(17) 0.0213(15) 0.0007(13) 0.0047(12) -0.0057(13)
 C3 0.0161(15) 0.0145(17) 0.0165(14) -0.0018(13) 0.0051(12) 0.0012(12)
 C4 0.0223(16) 0.0134(17) 0.0192(16) 0.0009(13) 0.0079(13) 0.0009(12)
 C5 0.0249(17) 0.0162(18) 0.0319(18) -0.0068(14) 0.0131(14) -0.0047(14)
 C6 0.0253(16) 0.0187(19) 0.0224(16) -0.0012(13) 0.0066(13) -0.0033(13)
 C7 0.0136(14) 0.0207(17) 0.0171(14) 0.0001(14) 0.0031(11) -0.0020(14)
 C8 0.0172(14) 0.0208(17) 0.0216(15) -0.0040(14) 0.0063(12) -0.0040(14)
 C9 0.0221(16) 0.0175(17) 0.0155(14) -0.0026(13) 0.0030(12) 0.0024(12)
 C10 0.0196(15) 0.0185(18) 0.0162(14) -0.0060(13) 0.0041(12) -0.0062(12)
 C11 0.0113(14) 0.0217(18) 0.0150(15) -0.0009(12) 0.0019(11) -0.0010(12)
 C12 0.0193(16) 0.0213(18) 0.0315(18) 0.0009(14) 0.0035(13) -0.0098(15)
 C13 0.0165(14) 0.0209(18) 0.0166(14) -0.0021(13) 0.0049(12) -0.0001(13)
 C14 0.0270(16) 0.0222(18) 0.0197(14) 0.0010(16) 0.0053(12) -0.0008(14)
 C15 0.0212(16) 0.0240(19) 0.0237(16) 0.0041(14) 0.0070(13) 0.0008(14)
 C16 0.0211(16) 0.0276(19) 0.0212(16) -0.0031(14) 0.0034(13) 0.0095(14)
 C17 0.0132(14) 0.0242(18) 0.0238(16) -0.0018(13) 0.0058(12) -0.0051(14)
 C18 0.0175(15) 0.0240(19) 0.0211(16) 0.0017(14) 0.0032(12) 0.0007(14)
 C19 0.0156(14) 0.0175(18) 0.0245(16) 0.0028(13) 0.0019(12) 0.0031(13)
 C20 0.0187(16) 0.025(2) 0.0196(16) 0.0025(14) 0.0056(13) 0.0050(14)
 C21 0.0101(13) 0.0150(17) 0.0207(15) -0.0039(11) 0.0040(11) -0.0014(12)
 C22 0.0260(17) 0.032(2) 0.0174(16) -0.0081(15) -0.0027(13) 0.0073(14)
 C23 0.0250(17) 0.0167(17) 0.0178(15) 0.0015(14) 0.0055(13) 0.0051(13)
 C24 0.0166(14) 0.0148(17) 0.0201(15) -0.0013(12) 0.0072(12) 0.0009(13)
 C25 0.0319(19) 0.0193(18) 0.0229(17) 0.0005(15) 0.0113(14) 0.0001(14)
 C26 0.0196(16) 0.0265(19) 0.0362(19) -0.0005(15) 0.0126(14) -0.0033(16)
 C27 0.0171(16) 0.0250(19) 0.040(2) -0.0032(14) 0.0119(14) -0.0060(16)
 C28 0.0174(16) 0.029(2) 0.0254(17) 0.0048(14) 0.0042(13) -0.0073(14)
 C29 0.038(2) 0.0220(19) 0.0163(15) -0.0007(15) 0.0021(14) 0.0011(13)
 C31 0.0207(16) 0.036(2) 0.0193(16) 0.0039(14) 0.0077(13) -0.0016(14)

#==============================================================================
_computing_data_collection                        'RAPID AUTO (Rigaku, ????)'
_computing_cell_refinement                        'RAPID AUTO'
_computing_data_reduction                         'RAPID AUTO'
_computing_structure_solution
                                                'SIR2011 (Burla, et al., 2012)'
_computing_structure_refinement
                                                 'SHELXL2013 (Sheldrick, 2008)'
_computing_publication_material
                                          'CrystalStructure 4.1 (Rigaku, 2014)'
_computing_molecular_graphics                     'CrystalStructure 4.1'

#==============================================================================
# MOLECULAR GEOMETRY

_geom_special_details
;
    ENTER SPECIAL DETAILS OF THE MOLECULAR GEOMETRY
;

loop_
_geom_bond_atom_site_label_1
_geom_bond_atom_site_label_2
_geom_bond_distance
_geom_bond_publ_flag
_geom_bond_site_symmetry_1
_geom_bond_site_symmetry_2
S1 C21 1.682(3) yes . .
S2 C10 1.688(3) yes . .
N1 C10 1.319(4) yes . .
N1 C15 1.463(5) yes . .
N1 C26 1.469(5) yes . .
N30 C4 1.483(4) yes . .
N30 C21 1.337(4) yes . .
N30 C25 1.474(5) yes . .
C2 C4 1.535(4) yes . .
C2 C5 1.398(5) yes . .
C2 C8 1.386(5) yes . .
C3 C11 1.521(5) yes . .
C3 C13 1.545(4) yes . .
C3 C24 1.557(5) yes . .
C4 C9 1.531(4) yes . .
C5 C27 1.383(5) yes . .
C6 C8 1.389(4) yes . .
C6 C12 1.388(5) yes . .
C7 C11 1.397(5) yes . .
C7 C19 1.389(5) yes . .
C9 C14 1.397(5) yes . .
C9 C23 1.387(5) yes . .
C10 C13 1.518(5) yes . .
C11 C20 1.394(5) yes . .
C12 C27 1.379(5) yes . .
C14 C29 1.383(5) yes . .
C16 C22 1.374(5) yes . .
C16 C23 1.397(4) yes . .
C17 C18 1.526(5) yes . .
C17 C24 1.536(4) yes . .
C18 C25 1.526(5) yes . .
C19 C28 1.400(5) yes . .
C20 C31 1.394(5) yes . .
C21 C24 1.527(5) yes . .
C22 C29 1.391(5) yes . .
C28 C31 1.375(5) yes . .
C3 H3 1.000 no . .
C4 H4 1.000 no . .
C5 H5 0.950 no . .
C6 H6 0.950 no . .
C7 H7 0.950 no . .
C8 H8 0.950 no . .
C12 H12 0.950 no . .
C13 H13A 0.990 no . .
C13 H13B 0.990 no . .
C14 H14 0.950 no . .
C15 H15A 0.980 no . .
C15 H15B 0.980 no . .
C15 H15C 0.980 no . .
C16 H16 0.950 no . .
C17 H17A 0.990 no . .
C17 H17B 0.990 no . .
C18 H18A 0.990 no . .
C18 H18B 0.990 no . .
C19 H19 0.950 no . .
C20 H20 0.950 no . .
C22 H22 0.950 no . .
C23 H23 0.950 no . .
C24 H24 1.000 no . .
C25 H25A 0.990 no . .
C25 H25B 0.990 no . .
C26 H26A 0.980 no . .
C26 H26B 0.980 no . .
C26 H26C 0.980 no . .
C27 H27 0.950 no . .
C28 H28 0.950 no . .
C29 H29 0.950 no . .
C31 H31 0.950 no . .

loop_
_geom_angle_atom_site_label_1
_geom_angle_atom_site_label_2
_geom_angle_atom_site_label_3
_geom_angle
_geom_angle_publ_flag
_geom_angle_site_symmetry_1
_geom_angle_site_symmetry_2
_geom_angle_site_symmetry_3
C10 N1 C15 123.5(3) yes . . .
C10 N1 C26 120.9(3) yes . . .
C15 N1 C26 115.2(3) yes . . .
C4 N30 C21 120.3(3) yes . . .
C4 N30 C25 118.5(3) yes . . .
C21 N30 C25 120.7(3) yes . . .
C4 C2 C5 118.2(3) yes . . .
C4 C2 C8 123.2(3) yes . . .
C5 C2 C8 118.6(3) yes . . .
C11 C3 C13 108.9(2) yes . . .
C11 C3 C24 112.7(2) yes . . .
C13 C3 C24 113.1(3) yes . . .
N30 C4 C2 112.8(2) yes . . .
N30 C4 C9 112.9(3) yes . . .
C2 C4 C9 111.9(3) yes . . .
C2 C5 C27 120.5(3) yes . . .
C8 C6 C12 120.2(3) yes . . .
C11 C7 C19 121.2(3) yes . . .
C2 C8 C6 120.8(3) yes . . .
C4 C9 C14 118.2(3) yes . . .
C4 C9 C23 122.8(3) yes . . .
C14 C9 C23 118.9(3) yes . . .
S2 C10 N1 122.6(3) yes . . .
S2 C10 C13 117.7(2) yes . . .
N1 C10 C13 119.7(3) yes . . .
C3 C11 C7 121.5(3) yes . . .
C3 C11 C20 120.1(3) yes . . .
C7 C11 C20 118.1(3) yes . . .
C6 C12 C27 119.3(3) yes . . .
C3 C13 C10 110.1(3) yes . . .
C9 C14 C29 120.9(3) yes . . .
C22 C16 C23 120.4(3) yes . . .
C18 C17 C24 110.9(3) yes . . .
C17 C18 C25 113.1(3) yes . . .
C7 C19 C28 119.7(3) yes . . .
C11 C20 C31 120.9(3) yes . . .
S1 C21 N30 124.1(2) yes . . .
S1 C21 C24 119.2(2) yes . . .
N30 C21 C24 116.6(3) yes . . .
C16 C22 C29 120.0(3) yes . . .
C9 C23 C16 120.1(3) yes . . .
C3 C24 C17 110.4(3) yes . . .
C3 C24 C21 113.8(2) yes . . .
C17 C24 C21 107.4(3) yes . . .
N30 C25 C18 114.3(3) yes . . .
C5 C27 C12 120.7(3) yes . . .
C19 C28 C31 119.7(3) yes . . .
C14 C29 C22 119.6(3) yes . . .
C20 C31 C28 120.4(3) yes . . .
C11 C3 H3 107.282 no . . .
C13 C3 H3 107.280 no . . .
C24 C3 H3 107.275 no . . .
N30 C4 H4 106.195 no . . .
C2 C4 H4 106.199 no . . .
C9 C4 H4 106.198 no . . .
C2 C5 H5 119.773 no . . .
C27 C5 H5 119.776 no . . .
C8 C6 H6 119.903 no . . .
C12 C6 H6 119.916 no . . .
C11 C7 H7 119.413 no . . .
C19 C7 H7 119.404 no . . .
C2 C8 H8 119.614 no . . .
C6 C8 H8 119.617 no . . .
C6 C12 H12 120.326 no . . .
C27 C12 H12 120.335 no . . .
C3 C13 H13A 109.633 no . . .
C3 C13 H13B 109.642 no . . .
C10 C13 H13A 109.630 no . . .
C10 C13 H13B 109.636 no . . .
H13A C13 H13B 108.156 no . . .
C9 C14 H14 119.541 no . . .
C29 C14 H14 119.553 no . . .
N1 C15 H15A 109.472 no . . .
N1 C15 H15B 109.475 no . . .
N1 C15 H15C 109.466 no . . .
H15A C15 H15B 109.474 no . . .
H15A C15 H15C 109.468 no . . .
H15B C15 H15C 109.472 no . . .
C22 C16 H16 119.783 no . . .
C23 C16 H16 119.785 no . . .
C18 C17 H17A 109.461 no . . .
C18 C17 H17B 109.459 no . . .
C24 C17 H17A 109.453 no . . .
C24 C17 H17B 109.461 no . . .
H17A C17 H17B 108.050 no . . .
C17 C18 H18A 108.969 no . . .
C17 C18 H18B 108.966 no . . .
C25 C18 H18A 108.973 no . . .
C25 C18 H18B 108.969 no . . .
H18A C18 H18B 107.765 no . . .
C7 C19 H19 120.154 no . . .
C28 C19 H19 120.155 no . . .
C11 C20 H20 119.547 no . . .
C31 C20 H20 119.558 no . . .
C16 C22 H22 119.980 no . . .
C29 C22 H22 119.975 no . . .
C9 C23 H23 119.960 no . . .
C16 C23 H23 119.962 no . . .
C3 C24 H24 108.346 no . . .
C17 C24 H24 108.346 no . . .
C21 C24 H24 108.350 no . . .
N30 C25 H25A 108.693 no . . .
N30 C25 H25B 108.687 no . . .
C18 C25 H25A 108.683 no . . .
C18 C25 H25B 108.685 no . . .
H25A C25 H25B 107.605 no . . .
N1 C26 H26A 109.478 no . . .
N1 C26 H26B 109.476 no . . .
N1 C26 H26C 109.471 no . . .
H26A C26 H26B 109.472 no . . .
H26A C26 H26C 109.468 no . . .
H26B C26 H26C 109.463 no . . .
C5 C27 H27 119.655 no . . .
C12 C27 H27 119.654 no . . .
C19 C28 H28 120.155 no . . .
C31 C28 H28 120.155 no . . .
C14 C29 H29 120.182 no . . .
C22 C29 H29 120.185 no . . .
C20 C31 H31 119.801 no . . .
C28 C31 H31 119.807 no . . .

loop_
_geom_torsion_atom_site_label_1
_geom_torsion_atom_site_label_2
_geom_torsion_atom_site_label_3
_geom_torsion_atom_site_label_4
_geom_torsion
_geom_torsion_publ_flag
_geom_torsion_site_symmetry_1
_geom_torsion_site_symmetry_2
_geom_torsion_site_symmetry_3
_geom_torsion_site_symmetry_4
C15 N1 C10 S2 -174.2(2) no . . . .
C15 N1 C10 C13 4.8(4) no . . . .
C26 N1 C10 S2 -1.7(4) no . . . .
C26 N1 C10 C13 177.3(2) no . . . .
C4 N30 C21 S1 -0.3(4) no . . . .
C4 N30 C21 C24 -177.7(2) no . . . .
C21 N30 C4 C2 140.1(3) no . . . .
C21 N30 C4 C9 -91.8(3) no . . . .
C4 N30 C25 C18 145.3(2) no . . . .
C25 N30 C4 C2 -47.9(4) no . . . .
C25 N30 C4 C9 80.2(3) no . . . .
C21 N30 C25 C18 -42.7(4) no . . . .
C25 N30 C21 S1 -172.2(2) no . . . .
C25 N30 C21 C24 10.5(4) no . . . .
C4 C2 C5 C27 -177.2(3) no . . . .
C5 C2 C4 N30 -93.3(4) no . . . .
C5 C2 C4 C9 138.1(3) no . . . .
C4 C2 C8 C6 178.1(3) no . . . .
C8 C2 C4 N30 89.4(4) no . . . .
C8 C2 C4 C9 -39.2(4) no . . . .
C5 C2 C8 C6 0.9(5) no . . . .
C8 C2 C5 C27 0.2(5) no . . . .
C11 C3 C13 C10 -71.3(3) no . . . .
C13 C3 C11 C7 -62.4(3) no . . . .
C13 C3 C11 C20 112.2(3) no . . . .
C11 C3 C24 C17 64.7(3) no . . . .
C11 C3 C24 C21 -174.4(2) no . . . .
C24 C3 C11 C7 63.9(3) no . . . .
C24 C3 C11 C20 -121.5(3) no . . . .
C13 C3 C24 C17 -171.3(2) no . . . .
C13 C3 C24 C21 -50.4(3) no . . . .
C24 C3 C13 C10 162.6(2) no . . . .
N30 C4 C9 C14 -177.0(2) no . . . .
N30 C4 C9 C23 6.1(4) no . . . .
C2 C4 C9 C14 -48.4(4) no . . . .
C2 C4 C9 C23 134.7(3) no . . . .
C2 C5 C27 C12 -0.6(5) no . . . .
C8 C6 C12 C27 1.2(5) no . . . .
C12 C6 C8 C2 -1.6(5) no . . . .
C11 C7 C19 C28 0.9(4) no . . . .
C19 C7 C11 C3 173.5(2) no . . . .
C19 C7 C11 C20 -1.2(4) no . . . .
C4 C9 C14 C29 -177.0(3) no . . . .
C4 C9 C23 C16 176.9(3) no . . . .
C14 C9 C23 C16 0.1(5) no . . . .
C23 C9 C14 C29 0.0(5) no . . . .
S2 C10 C13 C3 -58.8(3) no . . . .
N1 C10 C13 C3 122.2(3) no . . . .
C3 C11 C20 C31 -174.3(2) no . . . .
C7 C11 C20 C31 0.4(4) no . . . .
C6 C12 C27 C5 -0.1(5) no . . . .
C9 C14 C29 C22 -0.1(5) no . . . .
C22 C16 C23 C9 -0.1(5) no . . . .
C23 C16 C22 C29 0.0(5) no . . . .
C18 C17 C24 C3 62.5(3) no . . . .
C18 C17 C24 C21 -62.2(3) no . . . .
C24 C17 C18 C25 32.1(4) no . . . .
C17 C18 C25 N30 17.9(4) no . . . .
C7 C19 C28 C31 0.1(4) no . . . .
C11 C20 C31 C28 0.6(4) no . . . .
S1 C21 C24 C3 101.5(3) no . . . .
S1 C21 C24 C17 -136.0(2) no . . . .
N30 C21 C24 C3 -81.0(3) no . . . .
N30 C21 C24 C17 41.5(3) no . . . .
C16 C22 C29 C14 0.1(5) no . . . .
C19 C28 C31 C20 -0.9(4) no . . . .

loop_
_geom_contact_atom_site_label_1
_geom_contact_atom_site_label_2
_geom_contact_distance
_geom_contact_publ_flag
_geom_contact_site_symmetry_1
_geom_contact_site_symmetry_2
S1 C4 3.031(3) no . .
S1 C13 3.576(4) no . .
S2 C3 3.182(3) no . .
S2 C26 2.986(4) no . .
N1 C3 3.535(4) no . .
N30 C3 3.242(4) no . .
N30 C5 3.355(5) no . .
N30 C8 3.378(4) no . .
N30 C17 2.765(4) no . .
N30 C23 2.871(4) no . .
C2 C12 2.796(4) no . .
C2 C14 2.977(4) no . .
C2 C25 2.993(5) no . .
C3 C18 3.020(4) no . .
C3 C25 3.186(5) no . .
C5 C6 2.765(5) no . .
C7 C13 3.085(5) no . .
C7 C24 3.181(5) no . .
C7 C31 2.769(5) no . .
C8 C9 3.004(4) no . .
C8 C14 3.217(4) no . .
C8 C25 3.317(5) no . .
C8 C27 2.762(5) no . .
C9 C21 3.318(4) no . .
C9 C22 2.788(5) no . .
C9 C25 3.285(5) no . .
C10 C11 3.056(4) no . .
C10 C20 3.556(4) no . .
C11 C17 3.082(5) no . .
C11 C28 2.806(5) no . .
C13 C15 2.882(5) no . .
C13 C20 3.511(4) no . .
C13 C21 3.027(4) no . .
C14 C16 2.763(5) no . .
C18 C21 2.942(4) no . .
C19 C20 2.774(5) no . .
C21 C23 3.418(4) no . .
C23 C25 3.383(4) no . .
C23 C29 2.778(5) no . .
C24 C25 2.786(5) no . .
S2 C5 3.585(4) no . 1_455
S2 C27 3.430(4) no . 1_455
N1 C29 3.457(4) no . 2_555
C5 S2 3.585(4) no . 1_655
C7 C16 3.569(4) no . 1_565
C10 C22 3.442(4) no . 2_555
C10 C29 3.559(4) no . 2_555
C12 C15 3.563(6) no . 1_645
C13 C22 3.392(4) no . 2_555
C15 C12 3.563(6) no . 1_465
C15 C22 3.531(6) no . 1_565
C16 C7 3.569(4) no . 1_545
C19 C23 3.600(5) no . 1_565
C22 C10 3.442(4) no . 2_545
C22 C13 3.392(4) no . 2_545
C22 C15 3.531(6) no . 1_545
C23 C19 3.600(5) no . 1_545
C27 S2 3.430(4) no . 1_655
C29 N1 3.457(4) no . 2_545
C29 C10 3.559(4) no . 2_545
S1 H4 2.5097 no . .
S1 H13B 2.8968 no . .
S1 H24 2.7403 no . .
S2 H3 2.6572 no . .
S2 H13A 3.5830 no . .
S2 H13B 2.9561 no . .
S2 H16 3.5032 no . .
S2 H20 3.5848 no . .
S2 H23 2.9946 no . .
S2 H25B 3.4141 no . .
S2 H26B 2.9006 no . .
S2 H26C 2.8777 no . .
N1 H13A 2.5134 no . .
N1 H13B 3.0702 no . .
N30 H3 3.0491 no . .
N30 H5 3.3723 no . .
N30 H8 3.4196 no . .
N30 H13B 3.3097 no . .
N30 H17A 2.9207 no . .
N30 H18A 3.0479 no . .
N30 H18B 3.2577 no . .
N30 H23 2.5150 no . .
N30 H24 3.2243 no . .
C2 H6 3.2669 no . .
C2 H14 2.7075 no . .
C2 H25A 2.5042 no . .
C2 H27 3.2692 no . .
C3 H7 2.7026 no . .
C3 H17A 3.3947 no . .
C3 H17B 2.7161 no . .
C3 H18B 2.9456 no . .
C3 H20 2.6733 no . .
C3 H23 3.4860 no . .
C3 H25B 2.9301 no . .
C4 H5 2.6486 no . .
C4 H8 2.7351 no . .
C4 H14 2.6417 no . .
C4 H23 2.7323 no . .
C4 H25A 2.5671 no . .
C4 H25B 2.9934 no . .
C5 H4 2.5254 no . .
C5 H8 3.2540 no . .
C5 H12 3.2586 no . .
C5 H14 3.4363 no . .
C5 H25A 3.5210 no . .
C6 H25A 3.5173 no . .
C6 H27 3.2465 no . .
C7 H3 3.3318 no . .
C7 H13A 2.7133 no . .
C7 H15B 2.9451 no . .
C7 H17B 3.3445 no . .
C7 H20 3.2549 no . .
C7 H24 2.8547 no . .
C7 H28 3.2695 no . .
C8 H4 3.3017 no . .
C8 H5 3.2534 no . .
C8 H12 3.2658 no . .
C8 H14 3.0060 no . .
C8 H25A 2.5152 no . .
C9 H8 2.7545 no . .
C9 H16 3.2673 no . .
C9 H25A 3.3048 no . .
C9 H25B 3.2860 no . .
C9 H29 3.2752 no . .
C10 H3 2.5673 no . .
C10 H15A 3.2297 no . .
C10 H15B 2.7172 no . .
C10 H15C 2.7172 no . .
C10 H20 3.5822 no . .
C10 H23 3.4906 no . .
C10 H26A 3.2155 no . .
C10 H26B 2.6836 no . .
C10 H26C 2.6835 no . .
C11 H13A 2.6099 no . .
C11 H13B 3.3444 no . .
C11 H15B 3.3214 no . .
C11 H17B 2.7252 no . .
C11 H18B 3.4026 no . .
C11 H19 3.2821 no . .
C11 H24 2.7107 no . .
C11 H31 3.2785 no . .
C12 H5 3.2545 no . .
C12 H8 3.2611 no . .
C13 H7 2.9991 no . .
C13 H15B 2.7947 no . .
C13 H15C 2.8575 no . .
C13 H23 3.1780 no . .
C13 H24 2.8543 no . .
C14 H4 2.7602 no . .
C14 H8 3.0339 no . .
C14 H22 3.2558 no . .
C14 H23 3.2591 no . .
C15 H13A 2.3947 no . .
C15 H13B 3.4937 no . .
C15 H26A 2.4559 no . .
C15 H26B 3.0686 no . .
C15 H26C 3.1506 no . .
C16 H29 3.2524 no . .
C17 H3 2.6551 no . .
C17 H25A 3.2886 no . .
C17 H25B 3.0713 no . .
C18 H3 2.5857 no . .
C18 H24 3.3731 no . .
C19 H15B 3.4220 no . .
C19 H31 3.2586 no . .
C20 H3 2.5316 no . .
C20 H7 3.2535 no . .
C20 H17B 3.2209 no . .
C20 H18B 3.3275 no . .
C20 H28 3.2617 no . .
C21 H3 2.8202 no . .
C21 H4 2.4842 no . .
C21 H13A 3.4842 no . .
C21 H13B 2.5670 no . .
C21 H17A 2.6417 no . .
C21 H17B 3.3327 no . .
C21 H23 2.8949 no . .
C21 H25A 3.2243 no . .
C21 H25B 2.8117 no . .
C22 H14 3.2543 no . .
C22 H23 3.2594 no . .
C23 H4 3.0995 no . .
C23 H8 3.5150 no . .
C23 H13B 3.2531 no . .
C23 H14 3.2551 no . .
C23 H22 3.2628 no . .
C23 H25B 2.9932 no . .
C24 H7 3.0162 no . .
C24 H13A 2.9156 no . .
C24 H13B 2.6690 no . .
C24 H18A 3.3287 no . .
C24 H18B 2.9391 no . .
C24 H25B 3.0295 no . .
C25 H3 2.6133 no . .
C25 H4 3.3275 no . .
C25 H8 3.1695 no . .
C25 H17A 2.9677 no . .
C25 H17B 3.3468 no . .
C25 H23 2.8892 no . .
C26 H15A 2.4533 no . .
C26 H15B 3.1524 no . .
C26 H15C 3.0675 no . .
C27 H6 3.2468 no . .
C28 H7 3.2665 no . .
C28 H20 3.2552 no . .
C29 H16 3.2523 no . .
C31 H19 3.2572 no . .
H3 H13A 2.8692 no . .
H3 H13B 2.4673 no . .
H3 H17A 3.5790 no . .
H3 H17B 2.9047 no . .
H3 H18A 3.5692 no . .
H3 H18B 2.3388 no . .
H3 H20 2.3060 no . .
H3 H23 3.0983 no . .
H3 H24 2.8829 no . .
H3 H25A 3.5389 no . .
H3 H25B 2.1509 no . .
H4 H5 2.3189 no . .
H4 H14 2.7338 no . .
H4 H23 3.2994 no . .
H4 H25A 3.4541 no . .
H5 H27 2.3252 no . .
H6 H8 2.3321 no . .
H6 H12 2.3413 no . .
H7 H13A 2.4212 no . .
H7 H15B 2.9194 no . .
H7 H17B 3.5582 no . .
H7 H19 2.3322 no . .
H7 H24 2.4412 no . .
H8 H14 3.0780 no . .
H8 H25A 2.3982 no . .
H8 H25B 3.3691 no . .
H12 H27 2.3291 no . .
H13A H15A 3.3677 no . .
H13A H15B 2.1391 no . .
H13A H15C 2.2827 no . .
H13A H24 2.8347 no . .
H13B H15B 3.5563 no . .
H13B H15C 3.2213 no . .
H13B H23 2.4848 no . .
H13B H24 2.9984 no . .
H13B H25B 3.5117 no . .
H14 H29 2.3295 no . .
H15A H26A 2.0456 no . .
H15A H26B 3.0897 no . .
H15A H26C 3.1555 no . .
H15B H26A 3.1606 no . .
H15C H26A 3.0891 no . .
H15C H26B 3.4139 no . .
H16 H22 2.3208 no . .
H16 H23 2.3434 no . .
H17A H18A 2.2404 no . .
H17A H18B 2.8292 no . .
H17A H24 2.3644 no . .
H17A H25A 3.5378 no . .
H17B H18A 2.5218 no . .
H17B H18B 2.2370 no . .
H17B H20 3.3705 no . .
H17B H24 2.3754 no . .
H18A H25A 2.1851 no . .
H18A H25B 2.7723 no . .
H18B H20 2.8300 no . .
H18B H25A 2.5927 no . .
H18B H25B 2.1840 no . .
H19 H28 2.3543 no . .
H20 H31 2.3350 no . .
H22 H29 2.3430 no . .
H23 H25A 3.3696 no . .
H23 H25B 2.3741 no . .
H28 H31 2.3246 no . .
S1 H15A 3.3172 no . 2_545
S1 H26A 3.3945 no . 1_655
S1 H26B 3.4795 no . 1_655
S1 H29 3.3595 no . 1_565
S2 H5 3.1279 no . 1_455
S2 H19 3.2455 no . 1_545
S2 H27 2.8251 no . 1_455
S2 H31 2.9052 no . 2_546
N1 H12 3.4256 no . 1_465
N1 H29 3.5742 no . 2_555
C5 H26B 3.1663 no . 1_655
C5 H31 3.1060 no . 2_646
C6 H17A 3.1552 no . 1_545
C6 H17B 3.3354 no . 1_545
C6 H18B 2.8741 no . 2_646
C6 H20 2.9687 no . 2_646
C6 H24 3.5085 no . 1_545
C6 H26A 3.2886 no . 1_645
C6 H26C 3.5813 no . 1_645
C7 H8 2.9223 no . 1_565
C7 H18A 3.1044 no . 2_656
C8 H7 3.4271 no . 1_545
C8 H18B 3.0890 no . 2_646
C8 H20 3.5052 no . 2_646
C8 H24 3.2996 no . 1_545
C9 H7 3.0698 no . 1_545
C9 H15C 3.0311 no . 2_545
C10 H22 3.3289 no . 2_555
C10 H29 3.5307 no . 2_555
C11 H18A 3.1724 no . 2_656
C12 H15A 3.1711 no . 1_645
C12 H15B 3.2971 no . 1_645
C12 H20 2.8993 no . 2_646
C12 H26A 3.3364 no . 1_645
C12 H26C 3.5655 no . 1_645
C12 H31 3.5329 no . 2_646
C13 H22 3.0946 no . 2_555
C14 H7 3.1254 no . 1_545
C14 H15C 3.2041 no . 2_545
C14 H24 3.5438 no . 1_545
C14 H26B 3.3913 no . 2_545
C15 H12 3.4332 no . 1_465
C15 H16 3.5512 no . 1_565
C15 H22 2.9929 no . 1_565
C15 H27 3.4951 no . 1_465
C16 H7 2.9225 no . 1_545
C16 H13A 3.4913 no . 2_545
C16 H13B 3.3563 no . 2_545
C16 H15B 3.1150 no . 1_545
C16 H15C 2.7816 no . 2_545
C16 H19 3.3053 no . 1_545
C16 H22 3.2095 no . 2_555
C16 H27 3.5853 no . 1_455
C17 H6 2.8791 no . 1_565
C17 H25A 3.5489 no . 2_656
C17 H26C 3.5026 no . 1_655
C18 H6 3.3463 no . 2_656
C18 H8 3.5341 no . 2_656
C18 H17B 3.1805 no . 2_646
C19 H8 3.3970 no . 1_565
C19 H12 3.3561 no . 1_465
C19 H18A 2.9336 no . 2_656
C19 H23 3.5776 no . 1_565
C19 H25B 3.2480 no . 1_565
C19 H27 3.0429 no . 1_465
C20 H12 3.5920 no . 1_465
C20 H18A 3.0200 no . 2_656
C21 H26A 3.5354 no . 1_655
C21 H26B 3.5784 no . 1_655
C22 H7 2.9932 no . 1_545
C22 H13A 3.0396 no . 1_545
C22 H13A 3.4401 no . 2_545
C22 H13B 2.8397 no . 2_545
C22 H15B 3.0343 no . 1_545
C22 H15C 3.1281 no . 1_545
C22 H15C 2.9788 no . 2_545
C23 H7 2.9627 no . 1_545
C23 H15C 2.8076 no . 2_545
C23 H19 2.9512 no . 1_545
C23 H22 3.1997 no . 2_555
C25 H17B 3.2669 no . 2_646
C25 H19 3.2771 no . 1_545
C26 H5 3.1740 no . 1_455
C26 H12 3.5236 no . 1_465
C26 H17A 3.1355 no . 1_455
C27 H15A 3.1460 no . 1_645
C27 H15B 3.1773 no . 1_645
C27 H20 3.3584 no . 2_646
C27 H31 2.9929 no . 2_646
C28 H12 2.9470 no . 1_465
C28 H17A 3.2815 no . 2_656
C28 H18A 2.7909 no . 2_656
C28 H26C 3.3669 no . 2_556
C28 H27 3.3875 no . 1_465
C29 H7 3.0965 no . 1_545
C29 H13A 3.2911 no . 1_545
C29 H15C 3.1859 no . 2_545
C29 H24 3.5636 no . 1_545
C29 H26B 3.1949 no . 2_545
C31 H12 3.0903 no . 1_465
C31 H18A 2.8259 no . 2_656
C31 H26C 3.4923 no . 2_556
H4 H15A 3.5714 no . 2_545
H4 H26B 3.2031 no . 1_655
H5 S2 3.1279 no . 1_655
H5 C26 3.1740 no . 1_655
H5 H26B 2.3173 no . 1_655
H5 H26C 3.2566 no . 1_655
H5 H29 3.0139 no . 2_655
H5 H31 3.2703 no . 2_646
H6 C17 2.8791 no . 1_545
H6 C18 3.3463 no . 2_646
H6 H17A 2.4019 no . 1_545
H6 H17B 2.5335 no . 1_545
H6 H18A 3.5151 no . 2_646
H6 H18B 2.4806 no . 2_646
H6 H20 3.2028 no . 2_646
H6 H24 3.2235 no . 1_545
H6 H25B 3.5394 no . 2_646
H6 H26A 3.3112 no . 1_645
H6 H26C 3.2604 no . 1_645
H6 H28 3.4763 no . 2_636
H7 C8 3.4271 no . 1_565
H7 C9 3.0698 no . 1_565
H7 C14 3.1254 no . 1_565
H7 C16 2.9225 no . 1_565
H7 C22 2.9932 no . 1_565
H7 C23 2.9627 no . 1_565
H7 C29 3.0965 no . 1_565
H7 H8 2.5277 no . 1_565
H7 H16 3.4119 no . 1_565
H7 H22 3.5142 no . 1_565
H7 H23 3.4707 no . 1_565
H8 C7 2.9223 no . 1_545
H8 C18 3.5341 no . 2_646
H8 C19 3.3970 no . 1_545
H8 H7 2.5277 no . 1_545
H8 H17B 3.2592 no . 1_545
H8 H18A 3.2599 no . 2_646
H8 H18B 2.8960 no . 2_646
H8 H19 3.3951 no . 1_545
H8 H24 2.8078 no . 1_545
H12 N1 3.4256 no . 1_645
H12 C15 3.4332 no . 1_645
H12 C19 3.3561 no . 1_645
H12 C20 3.5920 no . 1_645
H12 C26 3.5236 no . 1_645
H12 C28 2.9470 no . 1_645
H12 C31 3.0903 no . 1_645
H12 H15A 3.2957 no . 1_645
H12 H15B 3.0780 no . 1_645
H12 H20 3.1105 no . 2_646
H12 H26A 3.3775 no . 1_645
H12 H26C 3.2211 no . 1_645
H12 H28 3.1422 no . 1_645
H12 H28 3.5862 no . 2_636
H12 H31 3.3768 no . 1_645
H13A C16 3.4913 no . 2_555
H13A C22 3.0396 no . 1_565
H13A C22 3.4401 no . 2_555
H13A C29 3.2911 no . 1_565
H13A H16 3.4380 no . 2_555
H13A H22 2.8918 no . 1_565
H13A H22 3.3505 no . 2_555
H13A H29 3.3257 no . 1_565
H13B C16 3.3563 no . 2_555
H13B C22 2.8397 no . 2_555
H13B H16 3.2960 no . 2_555
H13B H22 2.3379 no . 2_555
H14 H24 3.5383 no . 1_545
H14 H26B 3.2723 no . 2_545
H15A S1 3.3172 no . 2_555
H15A C12 3.1711 no . 1_465
H15A C27 3.1460 no . 1_465
H15A H4 3.5714 no . 2_555
H15A H12 3.2957 no . 1_465
H15A H22 3.4641 no . 1_565
H15A H27 3.2531 no . 1_465
H15B C12 3.2971 no . 1_465
H15B C16 3.1150 no . 1_565
H15B C22 3.0343 no . 1_565
H15B C27 3.1773 no . 1_465
H15B H12 3.0780 no . 1_465
H15B H16 2.8925 no . 1_565
H15B H22 2.7460 no . 1_565
H15B H27 2.8522 no . 1_465
H15C C9 3.0311 no . 2_555
H15C C14 3.2041 no . 2_555
H15C C16 2.7816 no . 2_555
H15C C22 3.1281 no . 1_565
H15C C22 2.9788 no . 2_555
H15C C23 2.8076 no . 2_555
H15C C29 3.1859 no . 2_555
H15C H16 3.5893 no . 1_565
H15C H16 3.2249 no . 2_555
H15C H22 2.4149 no . 1_565
H15C H22 3.5096 no . 2_555
H15C H23 3.2615 no . 2_555
H16 C15 3.5512 no . 1_545
H16 H7 3.4119 no . 1_545
H16 H13A 3.4380 no . 2_545
H16 H13B 3.2960 no . 2_545
H16 H15B 2.8925 no . 1_545
H16 H15C 3.5893 no . 1_545
H16 H15C 3.2249 no . 2_545
H16 H19 3.3601 no . 1_545
H16 H22 3.0089 no . 2_555
H16 H27 2.9101 no . 1_455
H16 H29 2.9529 no . 2_555
H17A C6 3.1552 no . 1_565
H17A C26 3.1355 no . 1_655
H17A C28 3.2815 no . 2_646
H17A H6 2.4019 no . 1_565
H17A H26A 2.9790 no . 1_655
H17A H26B 3.4526 no . 1_655
H17A H26C 2.5371 no . 1_655
H17A H28 3.0742 no . 2_646
H17B C6 3.3354 no . 1_565
H17B C18 3.1805 no . 2_656
H17B C25 3.2669 no . 2_656
H17B H6 2.5335 no . 1_565
H17B H8 3.2592 no . 1_565
H17B H18A 2.8155 no . 2_656
H17B H18B 2.9925 no . 2_656
H17B H25A 2.7246 no . 2_656
H17B H25B 3.3855 no . 2_656
H18A C7 3.1044 no . 2_646
H18A C11 3.1724 no . 2_646
H18A C19 2.9336 no . 2_646
H18A C20 3.0200 no . 2_646
H18A C28 2.7909 no . 2_646
H18A C31 2.8259 no . 2_646
H18A H6 3.5151 no . 2_656
H18A H8 3.2599 no . 2_656
H18A H17B 2.8155 no . 2_646
H18A H19 3.4633 no . 2_646
H18A H20 3.5831 no . 2_646
H18A H28 3.2601 no . 2_646
H18A H31 3.3007 no . 2_646
H18B C6 2.8741 no . 2_656
H18B C8 3.0890 no . 2_656
H18B H6 2.4806 no . 2_656
H18B H8 2.8960 no . 2_656
H18B H17B 2.9925 no . 2_646
H18B H25A 3.2236 no . 2_656
H19 S2 3.2455 no . 1_565
H19 C16 3.3053 no . 1_565
H19 C23 2.9512 no . 1_565
H19 C25 3.2771 no . 1_565
H19 H8 3.3951 no . 1_565
H19 H16 3.3601 no . 1_565
H19 H18A 3.4633 no . 2_656
H19 H23 2.7547 no . 1_565
H19 H25A 3.2431 no . 1_565
H19 H25B 2.4690 no . 1_565
H19 H27 2.8284 no . 1_465
H20 C6 2.9687 no . 2_656
H20 C8 3.5052 no . 2_656
H20 C12 2.8993 no . 2_656
H20 C27 3.3584 no . 2_656
H20 H6 3.2028 no . 2_656
H20 H12 3.1105 no . 2_656
H20 H18A 3.5831 no . 2_656
H20 H28 3.5128 no . 2_546
H22 C10 3.3289 no . 2_545
H22 C13 3.0946 no . 2_545
H22 C15 2.9929 no . 1_545
H22 C16 3.2095 no . 2_545
H22 C23 3.1997 no . 2_545
H22 H7 3.5142 no . 1_545
H22 H13A 2.8918 no . 1_545
H22 H13A 3.3505 no . 2_545
H22 H13B 2.3379 no . 2_545
H22 H15A 3.4641 no . 1_545
H22 H15B 2.7460 no . 1_545
H22 H15C 2.4149 no . 1_545
H22 H15C 3.5096 no . 2_545
H22 H16 3.0089 no . 2_545
H22 H23 2.9915 no . 2_545
H23 C19 3.5776 no . 1_545
H23 H7 3.4707 no . 1_545
H23 H15C 3.2615 no . 2_545
H23 H19 2.7547 no . 1_545
H23 H22 2.9915 no . 2_555
H24 C6 3.5085 no . 1_565
H24 C8 3.2996 no . 1_565
H24 C14 3.5438 no . 1_565
H24 C29 3.5636 no . 1_565
H24 H6 3.2235 no . 1_565
H24 H8 2.8078 no . 1_565
H24 H14 3.5383 no . 1_565
H24 H26A 3.4426 no . 1_655
H24 H29 3.5765 no . 1_565
H25A C17 3.5489 no . 2_646
H25A H17B 2.7246 no . 2_646
H25A H18B 3.2236 no . 2_646
H25A H19 3.2431 no . 1_545
H25B C19 3.2480 no . 1_545
H25B H6 3.5394 no . 2_656
H25B H17B 3.3855 no . 2_646
H25B H19 2.4690 no . 1_545
H26A S1 3.3945 no . 1_455
H26A C6 3.2886 no . 1_465
H26A C12 3.3364 no . 1_465
H26A C21 3.5354 no . 1_455
H26A H6 3.3112 no . 1_465
H26A H12 3.3775 no . 1_465
H26A H17A 2.9790 no . 1_455
H26A H24 3.4426 no . 1_455
H26B S1 3.4795 no . 1_455
H26B C5 3.1663 no . 1_455
H26B C14 3.3913 no . 2_555
H26B C21 3.5784 no . 1_455
H26B C29 3.1949 no . 2_555
H26B H4 3.2031 no . 1_455
H26B H5 2.3173 no . 1_455
H26B H14 3.2723 no . 2_555
H26B H17A 3.4526 no . 1_455
H26B H29 2.9241 no . 2_555
H26C C6 3.5813 no . 1_465
H26C C12 3.5655 no . 1_465
H26C C17 3.5026 no . 1_455
H26C C28 3.3669 no . 2_546
H26C C31 3.4923 no . 2_546
H26C H5 3.2566 no . 1_455
H26C H6 3.2604 no . 1_465
H26C H12 3.2211 no . 1_465
H26C H17A 2.5371 no . 1_455
H26C H28 2.7702 no . 2_546
H26C H31 3.0111 no . 2_546
H27 S2 2.8251 no . 1_655
H27 C15 3.4951 no . 1_645
H27 C16 3.5853 no . 1_655
H27 C19 3.0429 no . 1_645
H27 C28 3.3875 no . 1_645
H27 H15A 3.2531 no . 1_645
H27 H15B 2.8522 no . 1_645
H27 H16 2.9101 no . 1_655
H27 H19 2.8284 no . 1_645
H27 H28 3.4231 no . 1_645
H27 H31 3.0952 no . 2_646
H28 H6 3.4763 no . 2_666
H28 H12 3.1422 no . 1_465
H28 H12 3.5862 no . 2_666
H28 H17A 3.0741 no . 2_656
H28 H18A 3.2601 no . 2_656
H28 H20 3.5128 no . 2_556
H28 H26C 2.7702 no . 2_556
H28 H27 3.4231 no . 1_465
H29 S1 3.3595 no . 1_545
H29 N1 3.5742 no . 2_545
H29 C10 3.5307 no . 2_545
H29 H5 3.0139 no . 2_645
H29 H13A 3.3257 no . 1_545
H29 H16 2.9529 no . 2_545
H29 H24 3.5765 no . 1_545
H29 H26B 2.9241 no . 2_545
H31 S2 2.9052 no . 2_556
H31 C5 3.1060 no . 2_656
H31 C12 3.5329 no . 2_656
H31 C27 2.9929 no . 2_656
H31 H5 3.2703 no . 2_656
H31 H12 3.3768 no . 1_465
H31 H18A 3.3007 no . 2_656
H31 H26C 3.0111 no . 2_556
H31 H27 3.0952 no . 2_656

#==============================================================================

#==============================================================================
# Additional structures and associated data_? identifiers
# should be added at this point if there is more than one 
# structure analysis in the CIF.


_shelxl_res_file
;
TITL 150122Nila1
CELL  1.54187 10.39896 9.11807 13.74092 90.00000 108.29130 90.00000
ZERR  2 0.00019 0.00017 0.00025 0.00000 0.00760 0.00000
LATT -1
SYMM    -X, .50+Y,    -Z
SFAC C H N S
UNIT 58 64 4 4
L.S. 10
FMAP 2
PLAN -21
WPDB -2
HTAB
BOND $H
CONF
LIST 4
TEMP -180.0
ACTA
SIZE 0.200 0.200 0.100
WGHT    0.043400    0.523900
FVAR       2.65507
S1    4    0.365621    0.470799    0.079534    11.00000    0.02709    0.02166 =
         0.01881    0.00248    0.00949    0.00270
S2    4   -0.012984    0.334640    0.279344    11.00000    0.02210    0.02215 =
         0.03542    0.00537    0.01255   -0.00344
N1    3   -0.125551    0.582351    0.193862    11.00000    0.01594    0.02209 =
         0.02153   -0.00302    0.00645   -0.00259
N30   3    0.420113    0.300053    0.245533    11.00000    0.01872    0.01444 =
         0.01896   -0.00210    0.00657   -0.00141
C2    1    0.563509    0.079640    0.241339    11.00000    0.01626    0.01654 =
         0.02126   -0.00566    0.00474    0.00066
C3    1    0.230763    0.553697    0.294580    11.00000    0.01614    0.01454 =
         0.01648    0.00121    0.00506   -0.00184
AFIX  13
H3    2    0.228239    0.463848    0.335673    11.00000   -1.20000
AFIX   0
C4    1    0.442752    0.175834    0.183111    11.00000    0.02233    0.01343 =
         0.01920    0.00094    0.00789    0.00092
AFIX  13
H4    2    0.467093    0.220463    0.124758    11.00000   -1.20000
AFIX   0
C5    1    0.690088    0.110881    0.230788    11.00000    0.02492    0.01620 =
         0.03189   -0.00471    0.01312   -0.00680
AFIX  43
H5    2    0.700049    0.192578    0.190849    11.00000   -1.20000
AFIX   0
C6    1    0.664037   -0.125830    0.349021    11.00000    0.02534    0.01868 =
         0.02239   -0.00331    0.00658   -0.00115
AFIX  43
H6    2    0.655194   -0.206033    0.390591    11.00000   -1.20000
AFIX   0
C7    1    0.207217    0.828142    0.319274    11.00000    0.01363    0.02067 =
         0.01711   -0.00204    0.00306    0.00006
AFIX  43
H7    2    0.224920    0.844806    0.256428    11.00000   -1.20000
AFIX   0
C8    1    0.551965   -0.040033    0.300281    11.00000    0.01719    0.02083 =
         0.02165   -0.00405    0.00635   -0.00401
AFIX  43
H8    2    0.466392   -0.063624    0.307415    11.00000   -1.20000
AFIX   0
C9    1    0.314706    0.084853    0.135009    11.00000    0.02205    0.01751 =
         0.01553    0.00238    0.00301   -0.00262
C10   1   -0.017304    0.497638    0.220101    11.00000    0.01959    0.01853 =
         0.01617   -0.00621    0.00409   -0.00601
C11   1    0.212218    0.685213    0.356992    11.00000    0.01126    0.02168 =
         0.01502   -0.00101    0.00190   -0.00092
C12   1    0.788898   -0.094723    0.337164    11.00000    0.01930    0.02134 =
         0.03146   -0.00982    0.00354    0.00088
AFIX  43
H12   2    0.865327   -0.154353    0.369398    11.00000   -1.20000
AFIX   0
C13   1    0.108877    0.545073    0.195333    11.00000    0.01653    0.02089 =
         0.01659   -0.00006    0.00493   -0.00209
AFIX  23
H13A  2    0.093441    0.642251    0.161507    11.00000   -1.20000
H13B  2    0.128601    0.473921    0.147475    11.00000   -1.20000
AFIX   0
C14   1    0.324864   -0.039465    0.078474    11.00000    0.02696    0.02215 =
         0.01974   -0.00084    0.00528    0.00102
AFIX  43
H14   2    0.410699   -0.067567    0.073799    11.00000   -1.20000
AFIX   0
C15   1   -0.135913    0.717198    0.134238    11.00000    0.02122    0.02404 =
         0.02374    0.00077    0.00702    0.00408
AFIX  33
H15A  2   -0.224854    0.762100    0.123810    11.00000   -1.20000
H15B  2   -0.064790    0.785693    0.171354    11.00000   -1.20000
H15C  2   -0.125038    0.694154    0.067599    11.00000   -1.20000
AFIX   0
C16   1    0.074588    0.040602    0.091543    11.00000    0.02108    0.02759 =
         0.02119    0.00945    0.00341   -0.00306
AFIX  43
H16   2   -0.011455    0.068082    0.096104    11.00000   -1.20000
AFIX   0
C17   1    0.486183    0.539390    0.375239    11.00000    0.01315    0.02421 =
         0.02383   -0.00510    0.00583   -0.00182
AFIX  23
H17A  2    0.573904    0.546127    0.361465    11.00000   -1.20000
H17B  2    0.481735    0.620732    0.421798    11.00000   -1.20000
AFIX   0
C18   1    0.477900    0.393080    0.426932    11.00000    0.01752    0.02402 =
         0.02109    0.00069    0.00324    0.00170
AFIX  23
H18A  2    0.569889    0.364495    0.470276    11.00000   -1.20000
H18B  2    0.421200    0.405480    0.472314    11.00000   -1.20000
AFIX   0
C19   1    0.176838    0.946236    0.371999    11.00000    0.01563    0.01752 =
         0.02451    0.00313    0.00189    0.00279
AFIX  43
H19   2    0.172518    1.042568    0.344818    11.00000   -1.20000
AFIX   0
C20   1    0.188293    0.664412    0.450309    11.00000    0.01870    0.02519 =
         0.01958    0.00504    0.00557    0.00247
AFIX  43
H20   2    0.191769    0.568235    0.477604    11.00000   -1.20000
AFIX   0
C21   1    0.385587    0.432072    0.203062    11.00000    0.01009    0.01498 =
         0.02070   -0.00138    0.00398   -0.00388
C22   1    0.085956   -0.081422    0.036117    11.00000    0.02599    0.03150 =
         0.01737    0.00725   -0.00270   -0.00808
AFIX  43
H22   2    0.007896   -0.137943    0.002505    11.00000   -1.20000
AFIX   0
C23   1    0.188727    0.124499    0.141223    11.00000    0.02498    0.01665 =
         0.01784    0.00512    0.00546    0.00148
AFIX  43
H23   2    0.180066    0.208805    0.179310    11.00000   -1.20000
AFIX   0
C24   1    0.369819    0.554693    0.274140    11.00000    0.01661    0.01479 =
         0.02008    0.00091    0.00722   -0.00133
AFIX  13
H24   2    0.379877    0.650837    0.242267    11.00000   -1.20000
AFIX   0
C25   1    0.418727    0.270159    0.350653    11.00000    0.03193    0.01933 =
         0.02290    0.00005    0.01132    0.00050
AFIX  23
H25A  2    0.470602    0.179167    0.375457    11.00000   -1.20000
H25B  2    0.324056    0.252504    0.348810    11.00000   -1.20000
AFIX   0
C26   1   -0.250954    0.536255    0.212835    11.00000    0.01956    0.02651 =
         0.03619   -0.00334    0.01260   -0.00052
AFIX  33
H26A  2   -0.320065    0.612472    0.188506    11.00000   -1.20000
H26B  2   -0.283290    0.444516    0.176158    11.00000   -1.20000
H26C  2   -0.233154    0.521031    0.286495    11.00000   -1.20000
AFIX   0
C27   1    0.800931    0.023644    0.278109    11.00000    0.01715    0.02499 =
         0.03995   -0.00595    0.01194   -0.00324
AFIX  43
H27   2    0.886227    0.045483    0.269847    11.00000   -1.20000
AFIX   0
C28   1    0.152607    0.922687    0.465399    11.00000    0.01743    0.02884 =
         0.02542   -0.00730    0.00417    0.00476
AFIX  43
H28   2    0.131618    1.002943    0.501841    11.00000   -1.20000
AFIX   0
C29   1    0.211648   -0.122224    0.029198    11.00000    0.03804    0.02204 =
         0.01630    0.00107    0.00210   -0.00072
AFIX  43
H29   2    0.219717   -0.206462   -0.009156    11.00000   -1.20000
AFIX   0
C31   1    0.159328    0.782836    0.504150    11.00000    0.02069    0.03605 =
         0.01931   -0.00161    0.00767    0.00389
AFIX  43
H31   2    0.144144    0.766822    0.567982    11.00000   -1.20000
AFIX   0
HKLF 4
 
REM  150122Nila1
REM R1 =  0.0313 for    4103 Fo > 4sig(Fo)  and  0.0334 for all    4261 data
REM    298 parameters refined using      1 restraints
 
END  
     
WGHT      0.0434      0.5248 

REM Instructions for potential hydrogen bonds
HTAB C4 S1
HTAB C13 S1

REM Highest difference peak  0.314,  deepest hole -0.221,  1-sigma level  0.050
Q1    1  -0.3188  0.4845  0.1373  11.00000  0.05    0.31
Q2    1   0.4964  0.1001  0.1960  11.00000  0.05    0.24
Q3    1  -0.2914  0.6217  0.2418  11.00000  0.05    0.22
Q4    1  -0.0939  0.3329  0.3012  11.00000  0.05    0.21
Q5    1  -0.0967  0.3687  0.2767  11.00000  0.05    0.21
Q6    1   0.2777  0.4649  0.1004  11.00000  0.05    0.21
Q7    1  -0.2588  0.4430  0.2565  11.00000  0.05    0.20
Q8    1   0.3728  0.1334  0.1584  11.00000  0.05    0.20
Q9    1   0.2930  0.5512  0.2860  11.00000  0.05    0.20
Q10   1   0.1722  0.5406  0.2579  11.00000  0.05    0.19
Q11   1   0.6170  0.1190  0.2479  11.00000  0.05    0.19
Q12   1   0.4319  0.5379  0.0766  11.00000  0.05    0.19
Q13   1   0.4742  0.4755  0.4092  11.00000  0.05    0.19
Q14   1  -0.0965  0.3008  0.2169  11.00000  0.05    0.18
Q15   1   0.4310  0.4458  0.1571  11.00000  0.05    0.18
Q16   1  -0.0072 -0.1216  0.0262  11.00000  0.05    0.18
Q17   1   0.1575  0.6492  0.3989  11.00000  0.05    0.18
Q18   1   0.3001  0.4611  0.0049  11.00000  0.05    0.18
Q19   1   0.4231  0.3725 -0.0203  11.00000  0.05    0.17
Q20   1   0.1547 -0.1262 -0.0391  11.00000  0.05    0.17
Q21   1  -0.1861  0.5449  0.2002  11.00000  0.05    0.17
;

_shelxl_hkl_file
;
   0   0   1  232.93   30.36
   0   0   1  227.86   24.42
   0   0   1  224.01   19.76
   0   0   1  244.91   13.75
   0   0   1  259.55   17.40
   0   0  -1  229.23   17.95
   0   0  -1  239.89   15.43
   0   0  -1  227.02   12.90
   0   0  -1  257.74   14.20
   0   0  -1  202.95   15.80
   0   0   264328.14 4036.66
   0   0   263030.29 3859.00
   0   0   270602.56 4328.03
   0   0   263938.68 3877.17
   0   0   265864.55 4051.63
   0   0  -262164.56 3832.33
   0   0  -264074.93 3929.36
   0   0  -270892.90 4307.05
   0   0  -267011.47 4062.63
   0   0  -271225.64 4425.28
   0   0   3  776.40   81.17
   0   0   3  728.31   56.94
   0   0   3  812.49   62.78
   0   0   3  766.97   37.86
   0   0   3  850.89   75.39
   0   0  -3  797.48   77.60
   0   0  -3  758.04   99.82
   0   0  -3  799.50   62.18
   0   0  -3  851.08   40.07
   0   0  -3  765.66   76.73
   0   0   4 1432.58   93.74
   0   0   4 1490.10  102.44
   0   0   4 1444.60   73.21
   0   0   4 1516.04  130.10
   0   0  -4 1449.80   91.25
   0   0  -4 1535.01  115.03
   0   0  -4 1508.44  105.64
   0   0  -4 1428.27   54.43
   0   0  -4 1527.66   91.16
   0   0   5 5395.08  258.05
   0   0   5 5280.51  253.27
   0   0   5 5302.41  230.27
   0   0   5 4916.32  231.58
   0   0  -5 5447.86  240.14
   0   0  -5 5336.04  260.60
   0   0  -5 5462.19  221.61
   0   0  -5 5160.26  244.86
   0   0   6  804.08   64.06
   0   0   6  620.68   38.81
   0   0   6  627.70   47.71
   0   0   6  577.66   53.51
   0   0  -6  669.96   44.29
   0   0  -6  634.99   45.11
   0   0  -6  645.26   26.00
   0   0  -6  650.23   60.05
   0   0   7 5351.44  313.95
   0   0   7 5601.34  241.67
   0   0   7 5178.12  250.05
   0   0  -7 5887.83  258.25
   0   0  -7 5301.96  214.67
   0   0  -7 5809.23  276.69
   0   0   8  222.94   42.00
   0   0   8  208.00   46.45
   0   0   8  201.73   27.24
   0   0   8  238.29   36.97
   0   0  -8  289.32   29.86
   0   0  -8  209.39   30.55
   0   0   9  153.89   38.05
   0   0   9  148.81   57.88
   0   0  -9  141.95   26.44
   0   0  10    1.32   23.73
   0   0  10   11.26   21.68
   0   0 -10    4.95   28.47
   0   0  11 3068.92  214.95
   0   0  11 2917.01  164.91
   0   0 -11 2997.26  149.73
   0   0  12  389.91   87.95
   0   0  12  325.63   53.94
   0   0 -12  329.08   39.77
   0   0  13   16.40   21.82
   0   0  13  -10.15   22.54
   0   0 -13    3.18   15.47
   0   0  14 4030.58  217.91
   0   0  14 3661.87  203.18
   0   0 -14 4263.12  231.19
   0   0  15   50.59   43.10
   0   0  15   26.92   29.62
   0   0 -15   54.81   20.09
   0   1   0    1.67    8.36
   0   1   0   24.16   10.09
   0   1   0    4.02    7.44
   0  -1   0    0.65    6.87
   0  -1   0    8.40    5.70
   0  -1   0   -0.97   11.42
   0  -1   0   13.37   12.52
   0   1   1 8098.19  350.89
   0   1  -1 8192.74  357.56
   0   1   1 8057.42  327.46
   0   1   1 8452.59  324.03
   0   1  -1 8141.68  321.21
   0   1   1 7888.52  323.24
   0   1  -1 8062.34  335.43
   0   1   1 7918.17  328.17
   0   1  -1 7888.38  331.52
   0   1  -1 8077.95  354.83
   0  -1   1 8327.54  345.04
   0  -1   1 7962.07  345.70
   0  -1   1 8543.81  333.80
   0  -1   1 7957.03  320.69
   0  -1   1 7772.18  315.10
   0  -1  -1 7909.55  315.15
   0  -1  -1 7757.16  373.04
   0  -1  -1 7536.37  314.20
   0  -1  -1 7996.06  303.05
   0   1   2 5542.19  268.06
   0   1  -2 5574.38  237.43
   0   1  -2 5273.14  258.85
   0   1  -2 5399.18  229.67
   0   1   2 5570.57  235.03
   0   1   2 5381.46  238.58
   0   1  -2 5612.18  211.16
   0  -1   2 6445.20  267.30
   0  -1  -2 6135.17  282.32
   0  -1   2 6092.36  221.86
   0  -1  -2 5881.45  270.94
   0  -1   2 5996.01  249.47
   0  -1  -2 6041.00  252.66
   0  -1  -2 5247.66  235.90
   0  -1   2 5771.74  268.98
   0   1   318154.84  892.61
   0   1   317650.89  993.53
   0   1   317267.69  783.52
   0   1  -316527.47  864.48
   0   1   317058.22  813.17
   0   1  -317661.51  812.18
   0   1  -319404.00  866.84
   0   1  -318676.01  938.54
   0   1  -317641.10  892.66
   0  -1   316493.03  797.06
   0  -1   317220.35  845.33
   0  -1  -316945.34  818.85
   0  -1   315745.88  780.69
   0  -1  -317412.71  870.70
   0  -1  -317318.42  940.83
   0  -1  -316644.79  833.06
   0  -1   316678.58  843.45
   0   1   412852.78  608.05
   0   1   411489.66  654.69
   0   1   412100.73  526.90
   0   1  -412506.02  665.36
   0   1   411989.52  543.28
   0   1  -411788.22  502.27
   0   1  -412323.82  525.96
   0   1  -412656.26  598.30
   0   1  -412113.18  558.70
   0  -1   412278.15  562.85
   0  -1   411771.20  561.18
   0  -1  -412238.40  595.45
   0  -1   412566.58  634.85
   0  -1  -412820.67  578.55
   0  -1  -412327.67  596.35
   0  -1   412813.67  614.79
   0  -1  -412879.41  613.12
   0   1   5 8725.54  444.02
   0   1   5 8429.86  476.78
   0   1   5 8011.86  344.61
   0   1  -5 8565.95  409.40
   0   1   5 7604.51  347.32
   0   1  -5 8145.35  325.69
   0   1  -5 8217.26  321.77
   0   1  -5 8329.15  385.58
   0   1  -5 8215.15  365.85
   0  -1   5 8089.40  392.32
   0  -1   5 7888.07  365.89
   0  -1  -5 8390.80  370.40
   0  -1   5 8417.08  391.91
   0  -1  -5 8319.91  356.27
   0  -1  -5 8366.64  397.83
   0  -1   5 8925.65  452.23
   0  -1  -5 7843.26  374.58
   0   1  -6 2163.92   70.89
   0   1   6 2256.12  132.79
   0   1   6 2223.51   93.10
   0   1  -6 2309.77  118.39
   0   1   6 1990.72  110.61
   0   1   6 1985.70   81.92
   0   1  -6 2197.13   73.18
   0   1  -6 2212.80  132.45
   0   1  -6 2149.83  116.14
   0  -1   6 2509.45  114.86
   0  -1  -6 2677.35  116.07
   0  -1  -6 2519.25  133.21
   0  -1   6 2252.70  114.62
   0  -1   6 2600.19  126.61
   0  -1  -6 2613.15  100.36
   0  -1  -6 2534.43  131.47
   0  -1   6 2523.89  150.43
   0   1  -7 5793.11  270.61
   0   1   7 5561.77  278.62
   0   1   7 5740.82  300.22
   0   1  -7 5733.95  285.05
   0   1  -7 5624.50  264.44
   0   1   7 5136.38  249.59
   0  -1   7 6089.80  280.82
   0  -1   7 5784.27  259.44
   0  -1  -7 5919.73  284.33
   0  -1   7 5842.29  264.09
   0  -1  -7 4152.90  194.51
   0  -1  -7 6000.55  254.09
   0  -1   7 6363.71  288.26
   0   1   8 1081.21   72.55
   0   1   8 1131.85   84.29
   0   1   8 1130.47   92.65
   0   1  -8 1088.56   62.10
   0   1  -8 1054.82   84.14
   0   1   8 1005.00   74.00
   0  -1   8 1124.12   59.25
   0  -1   8 1194.77   98.88
   0  -1   8 1192.02  100.73
   0  -1  -8 1182.49   61.90
   0  -1   8 1114.90   67.12
   0  -1  -8 1035.05   59.39
   0   1   9 8988.01  438.57
   0   1   9 8253.04  421.99
   0   1  -9 8137.49  405.42
   0   1  -9 8525.88  398.58
   0  -1   9 7683.59  387.65
   0  -1   9 7544.63  377.45
   0  -1  -9 8347.06  390.49
   0  -1   9 8279.11  404.59
   0   1  10 3688.67  238.37
   0   1  10 3752.71  206.05
   0   1 -10 3734.38  177.08
   0  -1  10 3515.36  183.42
   0  -1 -10 3555.38  169.35
   0  -1  10 3385.73  178.70
   0   1  11  373.69   56.05
   0   1  11  404.84  102.54
   0   1 -11  389.65   43.87
   0  -1  11  455.95   50.12
   0  -1 -11  481.06   65.60
   0  -1  11  470.14   53.47
   0   1  12  519.44   68.29
   0   1  12  549.47   63.56
   0   1 -12  541.87   48.01
   0  -1  12  455.86   80.97
   0  -1  12  486.67   54.28
   0  -1 -12  453.97   43.57
   0   1  13 1336.06  103.14
   0   1  13 1293.23   97.55
   0   1 -13 1409.17  111.16
   0  -1  13 1249.44   86.27
   0  -1  13 1149.45  120.65
   0  -1 -13 1250.07   76.49
   0   1  14  194.86   45.53
   0   1 -14  178.44   30.72
   0   1  14  189.09   71.82
   0  -1  14  150.04   31.35
   0  -1 -14  134.91   27.85
   0  -1  14  104.41   37.79
   0   1  15 1222.01   87.02
   0   1 -15 1058.23   67.74
   0   1  15 1249.87   87.91
   0  -1  15 1179.46   78.93
   0  -1  15 1126.26   67.24
   0  -1 -15 1248.46   67.58
   0   2   053995.53 3229.86
   0   2   055926.61 3385.21
   0   2   059222.40 3420.41
   0   2   055954.40 3315.40
   0   2   055916.32 3362.75
   0  -2   054139.14 3200.68
   0  -2   052557.19 3109.58
   0  -2   053271.43 3176.07
   0  -2   051561.84 3056.76
   0   2   116930.53  832.06
   0   2  -116603.55  834.15
   0   2  -116853.10  846.06
   0   2   117804.13  853.75
   0   2   117391.83  802.95
   0   2   116537.47  791.95
   0   2  -117045.30  779.47
   0   2   116668.96  803.28
   0   2   116831.03  802.41
   0   2  -117043.61  816.13
   0   2  -116834.15  788.60
   0  -2   115543.26  765.37
   0  -2  -116442.23  793.95
   0  -2  -115715.91  722.96
   0  -2   115647.40  759.84
   0  -2   116916.99  767.94
   0  -2  -115974.28  783.11
   0  -2  -115366.42  748.43
   0  -2   115885.20  781.17
   0  -2   116098.94  780.06
   0   2   212022.46  659.56
   0   2   211083.29  506.56
   0   2  -211597.31  528.80
   0   2   211640.32  532.14
   0   2   211767.19  582.80
   0   2  -213301.55  658.20
   0   2   211914.00  555.38
   0   2  -211865.09  544.98
   0   2  -211895.79  524.82
   0   2  -211232.41  563.87
   0  -2  -213089.08  622.21
   0  -2   213652.41  597.26
   0  -2   212618.95  568.48
   0  -2   212508.85  582.43
   0  -2  -212289.94  549.68
   0  -2   212970.80  626.35
   0  -2  -211917.48  554.75
   0  -2   213581.46  602.48
   0   2   337554.05 2140.10
   0   2  -338534.22 2146.83
   0   2   340770.55 2262.34
   0   2   339342.22 2171.87
   0   2  -336195.95 2075.17
   0   2   336113.07 2006.68
   0   2   338251.57 2127.87
   0   2  -336836.69 2073.84
   0   2  -339267.01 2118.97
   0  -2   336492.01 2011.29
   0  -2   337141.99 1987.62
   0  -2   337551.47 2065.25
   0  -2  -336768.92 2079.75
   0  -2  -337521.72 2082.11
   0  -2   335898.15 2048.04
   0   2  -4 3231.15  113.44
   0   2   4 3251.18  169.73
   0   2  -4 3282.76  137.67
   0   2  -4 2747.35  204.93
   0   2   4 3160.87  133.84
   0   2   4 3312.85  146.87
   0   2   4 3169.75  144.06
   0   2  -4 3194.04  110.32
   0   2  -4 3120.25  134.12
   0  -2   4 2742.17  123.47
   0  -2   4 2795.32  153.19
   0  -2  -4 2868.16  125.86
   0  -2   4 2782.70  147.65
   0  -2  -4 2663.08  120.91
   0  -2  -4 2726.49  184.98
   0  -2   4 2519.17  142.70
   0   2  -5 5890.54  261.38
   0   2   5 5747.64  288.96
   0   2   5 5728.81  300.06
   0   2  -5 6126.47  359.50
   0   2   5 5888.44  253.73
   0   2  -5 5471.33  243.56
   0   2   5 6317.98  288.89
   0  -2   5 5951.57  291.44
   0  -2   5 5891.97  335.32
   0  -2   5 5712.50  251.73
   0  -2  -5 5985.87  260.10
   0  -2  -5 5787.26  278.46
   0  -2  -5 6146.69  264.26
   0  -2   5 5985.66  290.26
   0   2  -6 8709.70  399.63
   0   2   6 8616.14  425.29
   0   2   6 8314.49  390.56
   0   2  -6 9099.33  443.12
   0   2   6 8920.67  412.42
   0   2  -6 8642.31  389.83
   0   2   6 8631.78  406.94
   0  -2   6 8102.12  404.49
   0  -2   6 8050.79  432.99
   0  -2   6 7936.63  361.74
   0  -2  -6 8014.95  362.50
   0  -2  -6 7770.58  381.60
   0  -2  -6 8142.21  382.28
   0  -2   6 7884.01  366.86
   0   2  -7 5101.20  237.64
   0   2   7 5281.15  270.84
   0   2   7 5582.00  262.12
   0   2  -7 5083.40  257.48
   0   2   7 5532.53  237.68
   0   2  -7 5339.51  240.98
   0   2   7 5247.32  252.96
   0  -2   7 5860.57  265.29
   0  -2   7 5648.08  268.53
   0  -2   7 5631.81  283.63
   0  -2  -7 6035.19  262.32
   0  -2  -7 5715.01  277.36
   0  -2  -7 5930.10  265.78
   0  -2   7 5724.04  260.31
   0   2   8 4693.66  229.15
   0   2   8 5064.78  260.24
   0   2   8 5041.63  277.13
   0   2  -8 4727.02  237.80
   0   2   8 4626.68  201.31
   0   2   8 4743.14  233.78
   0   2  -8 4798.86  219.07
   0  -2   8 4966.83  230.50
   0  -2   8 5010.19  232.58
   0  -2   8 5091.58  236.30
   0  -2   8 4855.63  231.43
   0  -2  -8 5155.90  228.74
   0  -2  -8 4961.11  210.84
   0   2   9  438.75   95.58
   0   2  -9  469.61   76.85
   0   2   9  436.48   48.92
   0   2  -9  426.91   39.54
   0  -2   9  377.75   61.87
   0  -2  -9  368.41   34.82
   0  -2   9  362.12   39.92
   0   2 -10 3636.93  171.62
   0   2  10 2833.20  233.39
   0   2  10 2931.22  200.24
   0   2 -10 2991.75  164.34
   0  -2  10 2707.23  142.94
   0  -2 -10 2849.24  138.92
   0  -2  10 2740.26  145.07
   0   2 -11  962.71   96.35
   0   2  11  933.89   88.48
   0   2  11  948.74   75.78
   0   2 -11  844.70   63.77
   0  -2  11  761.18   60.77
   0  -2 -11  749.22   55.10
   0  -2  11  762.82   59.56
   0   2  12  448.51   69.44
   0   2  12  434.30   57.78
   0   2 -12  439.19   47.87
   0  -2  12  539.28   67.71
   0  -2  12  560.86   76.26
   0  -2 -12  593.05   69.28
   0   2  13 2546.44  160.14
   0   2  13 2429.96  144.01
   0   2 -13 2541.08  130.37
   0  -2  13 2148.60  120.23
   0  -2  13 2102.35  121.10
   0  -2 -13 2325.75  119.42
   0   2  14  642.90  114.82
   0   2 -14  634.87   52.00
   0   2  14  650.19   98.25
   0  -2 -14  532.67   42.63
   0  -2  14  475.39   47.64
   0   2  15   90.62   36.68
   0   2 -15   91.08   42.30
   0   2  15   97.95   33.22
   0  -2 -15   69.12   32.68
   0  -2  15   51.79   35.65
   0   3   0    3.65   23.35
   0   3   0    0.69   11.42
   0   3   0   -2.64   10.87
   0   3   0    4.34   20.46
   0  -3   0    2.31   12.74
   0  -3   0    4.36   12.52
   0  -3   0    2.14    7.97
   0  -3   0   -0.59    7.51
   0   3  -1 4165.73  243.41
   0   3   1 4299.94  196.57
   0   3   1 4235.24  165.27
   0   3   1 4530.88  184.36
   0   3  -1 4420.25  207.48
   0   3   1 4371.22  216.91
   0   3   1 4339.84  161.92
   0   3   1 4260.22  188.23
   0   3  -1 4152.77  178.59
   0   3  -1 4410.53  187.49
   0  -3   1 4848.07  205.89
   0  -3  -1 4753.63  193.99
   0  -3  -1 4585.87  176.87
   0  -3   1 4628.66  197.22
   0  -3   1 4673.92  221.38
   0  -3  -1 4590.40  181.95
   0  -3  -1 4503.13  194.56
   0  -3   1 4817.89  213.36
   0   3   228800.13 1562.69
   0   3  -228665.38 1632.60
   0   3  -228624.75 1511.66
   0   3   228084.86 1434.67
   0   3  -227766.43 1422.55
   0   3   229030.34 1533.94
   0   3  -229685.09 1572.39
   0   3   228952.16 1541.12
   0   3   228965.51 1500.48
   0   3   229945.29 1558.07
   0   3  -228827.88 1504.21
   0  -3   229891.93 1525.93
   0  -3  -230450.96 1653.32
   0  -3   230941.48 1607.43
   0  -3   228797.97 1526.82
   0  -3   229212.58 1584.67
   0  -3  -228617.23 1460.07
   0  -3   229658.96 1550.30
   0   3   3 1357.59   89.22
   0   3   3 1364.68   62.15
   0   3  -3 1343.71   51.14
   0   3  -3 1376.42   65.27
   0   3   3 1349.85   69.03
   0   3  -3 1319.89   67.53
   0   3   3 1377.37   76.76
   0   3  -3 1299.78   68.42
   0   3   3 1310.23   81.73
   0   3  -3 1343.08  143.09
   0  -3   3 1731.39   63.37
   0  -3  -3 1835.29   94.69
   0  -3   3 1811.35   61.64
   0  -3   3 1748.39   69.38
   0  -3  -3 1769.96  118.15
   0  -3   3 1907.61  106.21
   0  -3   3 1840.84   80.79
   0   3   4 2826.58  144.90
   0   3   4 2787.11  149.51
   0   3   4 2749.02  122.81
   0   3  -4 2848.83  106.23
   0   3  -4 2867.99  221.10
   0   3   4 2803.60  156.65
   0   3  -4 2928.70  116.86
   0   3  -4 2847.61  128.48
   0  -3   4 3052.01  132.91
   0  -3   4 2888.92  129.24
   0  -3  -4 3116.74  196.22
   0  -3   4 2904.64  101.52
   0  -3   4 2811.95  116.97
   0  -3  -4 2895.49  164.32
   0  -3   4 2978.09  210.40
   0   3  -5 3330.41  139.78
   0   3   5 3298.42  176.10
   0   3   5 3254.98  169.89
   0   3  -5 3283.91  184.45
   0   3   5 3501.89  153.65
   0   3  -5 3414.75  153.21
   0   3   5 3181.12  146.08
   0  -3   5 3289.87  137.55
   0  -3   5 3508.87  228.82
   0  -3   5 3571.38  183.68
   0  -3  -5 3688.71  157.84
   0  -3  -5 3714.56  177.73
   0  -3  -5 3558.89  186.22
   0  -3   5 3459.44  144.41
   0   3  -614605.66  721.23
   0   3   615979.15  878.24
   0   3   616127.78  796.93
   0   3  -615955.92  830.22
   0   3   616379.94  799.44
   0   3  -615444.36  754.31
   0   3   614683.21  736.55
   0  -3   615142.70  742.69
   0  -3   615097.41  779.06
   0  -3   614584.93  712.85
   0  -3  -615283.87  743.01
   0  -3  -615259.32  771.81
   0  -3  -615700.53  796.41
   0  -3   614956.78  759.46
   0   3  -7 8031.62  409.91
   0   3   7 7840.55  399.93
   0   3   7 8503.35  398.64
   0   3   7 8306.84  398.28
   0   3  -7 8136.47  375.60
   0   3   7 7904.80  377.11
   0  -3   7 7791.59  363.10
   0  -3   7 8196.51  380.80
   0  -3   7 8121.02  402.73
   0  -3   7 8121.82  372.55
   0  -3  -7 8450.82  383.22
   0  -3  -7 8105.59  396.13
   0  -3  -7 7895.51  364.39
   0   3  -8 2581.23  149.20
   0   3   8 2776.70  161.30
   0   3   8 2709.12  121.33
   0   3   8 2965.34  142.23
   0   3  -8 2877.98  136.02
   0  -3   8 2519.29  120.17
   0  -3   8 2589.90  120.17
   0  -3  -8 3148.38  139.79
   0  -3   8 2522.53  119.60
   0  -3  -8 2726.86  120.05
   0   3   9 1897.32  133.64
   0   3   9 1864.86  126.82
   0   3   9 1811.45   82.36
   0   3  -9 1978.28  102.92
   0   3  -9 2050.06  178.63
   0  -3   9 1769.17  107.54
   0  -3  -9 1919.44  117.88
   0  -3   9 1889.03  113.02
   0   3  10 1220.18  104.37
   0   3  10 1079.36  111.05
   0   3 -10 1204.98   77.49
   0   3 -10 1193.55   95.53
   0  -3 -10 1306.64   71.72
   0  -3  10 1179.02   90.23
   0   3  11 1364.39  115.91
   0   3  11 1375.59   92.53
   0   3 -11 1378.31   86.18
   0   3 -11 1362.07  102.95
   0  -3 -11 1713.36   88.48
   0  -3  11 1512.06   84.32
   0   3  12 2312.87  155.99
   0   3  12 2235.99  131.48
   0   3 -12 2221.19  121.80
   0  -3  12 2207.33  116.98
   0  -3 -12 2470.31  144.86
   0   3  13  392.41  104.98
   0   3  13  400.68   48.67
   0   3 -13  403.21   45.54
   0  -3  13  334.05   33.22
   0  -3 -13  339.31   35.92
   0   3  14  204.93   53.88
   0   3  14  185.84   37.75
   0   3 -14  180.47   56.07
   0  -3  14  207.76   37.65
   0  -3 -14  235.12   26.75
   0   3  15  193.91   43.69
   0   3  15  195.75   33.04
   0   3 -15  197.51   29.17
   0  -3 -15  159.49   29.40
   0   4   0 2588.60  117.41
   0   4   0 2509.34  109.10
   0   4   0 2431.36  107.73
   0   4   0 2528.93  111.37
   0  -4   0 2460.02   97.11
   0  -4   0 2291.43   94.49
   0  -4   0 2338.50  100.06
   0  -4   0 2420.89  101.03
   0   4  -1 2063.88  120.37
   0   4   1 2042.93  121.77
   0   4  -1 2012.60   87.34
   0   4   1 2124.41   88.42
   0   4   1 2059.58   98.03
   0   4   1 2053.85   95.14
   0   4  -1 2068.31   89.00
   0   4  -1 2108.90  109.94
   0  -4   1 1998.59  104.78
   0  -4   1 2072.74   85.66
   0  -4  -1 2058.08   90.12
   0  -4  -1 2043.87   84.88
   0  -4  -1 1967.56   99.57
   0  -4   1 1985.62   79.93
   0  -4  -1 2007.03   94.04
   0  -4   1 1959.95   87.47
   0   4  -229356.40 1615.16
   0   4   227317.66 1489.32
   0   4   227746.52 1435.41
   0   4   226746.76 1394.58
   0   4  -228638.60 1518.06
   0   4   228454.46 1510.16
   0   4   226972.18 1400.12
   0   4  -226405.37 1404.55
   0  -4   228862.78 1525.08
   0  -4  -229945.04 1601.47
   0  -4   229295.75 1539.84
   0  -4  -227531.15 1429.24
   0  -4   230037.67 1585.79
   0  -4  -228424.24 1491.20
   0  -4   229041.14 1570.49
   0   4   3  176.56   55.53
   0   4   3  170.83   22.04
   0   4  -3  183.77   13.91
   0   4  -3  168.57    8.35
   0   4   3  188.74   25.86
   0   4  -3  184.02   19.77
   0   4   3  192.74   52.70
   0   4  -3  190.15   26.37
   0   4   3  196.14   24.93
   0   4  -3  208.49   43.68
   0  -4   3  159.04    9.98
   0  -4  -3  187.45   28.68
   0  -4   3  174.23   12.42
   0  -4   3  160.66   15.46
   0  -4  -3  171.66   33.31
   0  -4   3  191.43   38.32
   0  -4   3  177.66   40.19
   0   4  -411683.36  576.25
   0   4   411750.00  577.41
   0   4  -411548.87  505.76
   0   4  -410938.51  483.73
   0   4   412182.11  561.41
   0   4   411574.17  543.03
   0   4  -411891.67  605.87
   0   4   411645.36  552.12
   0   4   412103.73  551.57
   0  -4   411788.89  529.91
   0  -4   412074.98  558.26
   0  -4  -412022.63  617.04
   0  -4   410919.41  485.61
   0  -4   411607.91  528.52
   0  -4  -412477.26  593.25
   0  -4   411428.68  532.05
   0  -4   412235.81  607.34
   0   4   5 2713.09  118.85
   0   4   5 2684.82  140.58
   0   4  -5 2780.70  158.57
   0   4   5 2831.08  129.17
   0   4   5 2722.38  115.37
   0   4  -5 2641.20  121.52
   0  -4   5 2795.68  149.62
   0  -4   5 2680.96  107.68
   0  -4   5 2773.50  149.72
   0  -4  -5 2890.29  126.49
   0  -4  -5 2818.64  137.07
   0  -4  -5 2710.63  129.11
   0   4   6 2208.83  124.11
   0   4  -6 2148.01  132.72
   0   4   6 2213.11   99.95
   0   4   6 2173.54  101.69
   0   4   6 2192.95   97.00
   0   4  -6 2157.30  102.11
   0  -4   6 2048.57   97.94
   0  -4   6 2028.74  120.32
   0  -4  -6 2087.61   96.04
   0  -4  -6 2024.43  108.20
   0  -4  -6 2034.84  100.09
   0   4   7 7954.87  405.24
   0   4   7 8033.54  402.02
   0   4   7 8404.94  392.49
   0   4   7 8017.91  380.93
   0   4  -7 7511.69  399.02
   0   4  -7 8008.95  373.56
   0  -4  -7 7868.84  386.63
   0   4   8 3328.35  187.33
   0   4   8 3412.09  158.42
   0   4   8 3392.84  178.39
   0   4  -8 3203.19  244.35
   0   4  -8 3302.79  160.85
   0  -4  -8 3680.46  165.85
   0   4   9  869.17   84.65
   0   4   9  859.95   51.18
   0   4   9  855.18   80.31
   0   4  -9  875.38  148.50
   0   4  -9  845.07   63.67
   0  -4  -9 1047.65   59.77
   0   4  10 2090.14  142.51
   0   4  10 1811.93  100.45
   0   4  10 2021.93  109.48
   0   4 -10 2049.85  147.63
   0   4 -10 1999.77  113.73
   0  -4 -10 2193.29  130.58
   0   4  11  501.99  111.32
   0   4  11  464.72   45.63
   0   4 -11  484.67   71.91
   0   4 -11  454.96   49.88
   0  -4 -11  541.55   41.57
   0   4  12  644.63  123.23
   0   4  12  569.59   49.18
   0   4 -12  621.57   80.49
   0  -4 -12  481.93   41.58
   0   4  13 2073.39  141.12
   0   4 -13 2173.13  113.87
   0   4  13 2090.10  136.76
   0  -4 -13 1910.56   98.18
   0  -4  13 2016.10  109.88
   0   4  14  591.24   67.94
   0   4  14  575.01   44.02
   0   4 -14  604.14   47.53
   0  -4 -14  475.09   33.89
   0   5   0    3.46   12.51
   0   5   0    6.48   10.42
   0   5   0    3.49   24.41
   0   5   0   67.25   14.83
   0  -5   0    5.89    6.82
   0  -5   0    7.92   13.06
   0  -5   0   24.72   21.89
   0  -5   0    7.48   10.74
   0   5  -113737.24  655.73
   0   5   114145.32  679.23
   0   5  -113895.26  670.30
   0   5   113982.15  678.73
   0   5  -113589.36  675.59
   0   5   113719.88  653.73
   0   5  -114042.53  666.42
   0  -5   113943.14  644.80
   0  -5  -114526.19  688.11
   0  -5  -113189.24  617.86
   0  -5   113594.07  639.60
   0  -5  -113902.94  653.14
   0  -5   114216.50  678.35
   0  -5  -114762.15  734.22
   0  -5   113422.56  651.08
   0   5   2  768.06   64.69
   0   5  -2  788.38   47.35
   0   5  -2  750.04   56.62
   0   5   2  765.25   44.51
   0   5  -2  761.16   35.65
   0  -5  -2  769.01   39.57
   0  -5   2  722.21   40.53
   0  -5   2  725.93   42.23
   0  -5  -2  714.71   49.91
   0  -5  -2  713.05   42.94
   0   5   3 6158.54  285.85
   0   5  -3 6184.09  273.69
   0   5   3 6413.53  282.04
   0   5  -3 6376.26  312.51
   0   5  -3 6426.27  264.81
   0  -5   3 6408.15  296.84
   0  -5   3 6140.00  257.97
   0  -5  -3 6168.29  276.62
   0  -5   3 6326.83  295.55
   0  -5  -3 6053.82  282.58
   0   5   4 2873.24  140.95
   0   5  -4 2926.33  131.35
   0   5   4 2955.60  131.22
   0   5   4 2771.49  132.22
   0   5  -4 2930.60  160.42
   0  -5   4 3125.58  135.44
   0  -5  -4 3221.58  161.47
   0  -5   4 3073.28  156.73
   0  -5  -4 2885.25  139.95
   0   5   5  656.40   51.96
   0   5   5  601.53   46.07
   0   5  -5  653.92   44.27
   0   5  -5  652.86   68.59
   0  -5  -5  671.09   40.89
   0  -5  -5  660.95   47.34
   0   5   6  839.64   94.73
   0   5   6  846.95   54.75
   0   5  -6  827.91   81.15
   0   5  -6  827.72   52.41
   0  -5  -6  699.74   44.59
   0   5   7 1037.30  118.28
   0   5   7 1134.75   91.41
   0   5  -7 1177.72  147.72
   0   5  -7 1039.24   64.71
   0  -5  -7 1091.16   80.54
   0   5   8 6484.89  392.07
   0   5   8 6943.40  332.21
   0   5  -8 7101.07  471.24
   0   5  -8 6709.20  320.40
   0  -5  -8 6218.15  296.47
   0   5   9 5750.07  366.10
   0   5   9 5415.98  269.74
   0   5   9 5648.26  268.39
   0   5  -9 6083.59  351.14
   0   5  -9 5948.79  286.78
   0  -5  -9 6269.55  293.96
   0   5  10  991.86   88.40
   0   5  10  913.84   68.63
   0   5  10  908.10   52.18
   0   5 -10 1024.52  103.42
   0   5 -10  977.09   67.53
   0  -5 -10  802.31   72.80
   0   5  11 3727.53  214.28
   0   5  11 3494.60  167.19
   0   5 -11 3717.11  233.81
   0   5 -11 3729.20  184.94
   0  -5 -11 3673.66  178.13
   0   5  12  325.50   56.14
   0   5 -12  351.27   39.71
   0   5  12  281.75   41.68
   0  -5 -12  224.35   27.09
   0  -5  12  277.57   44.61
   0   5  13 1471.08  103.11
   0   5 -13 1464.76   81.25
   0   5  13 1257.09   64.25
   0  -5 -13 1086.41   59.21
   0  -5  13 1525.28   86.99
   0   6   0   24.48   16.64
   0   6   0   40.65   27.84
   0  -6   0   65.82   16.25
   0   6  -1  691.22   62.81
   0   6   1  707.72   43.32
   0   6  -1  744.41   68.34
   0  -6   1  783.09   41.25
   0   6   2 1613.69   74.70
   0   6   2 1649.37   94.61
   0   6  -2 1587.05  109.94
   0   6  -2 1721.11   82.23
   0  -6  -2 1543.14   65.53
   0   6   3 1652.79   81.23
   0   6   3 1663.82   78.63
   0   6   3 1679.13   87.06
   0   6  -3 1612.19   95.49
   0   6  -3 1695.29   83.39
   0  -6  -3 1576.58   81.34
   0   6   4  363.18   50.29
   0   6   4  322.53   30.66
   0   6   4  351.03   38.40
   0   6  -4  331.92   50.36
   0   6  -4  343.57   52.50
   0   6   5 2624.74  134.18
   0   6   5 2525.01  129.81
   0   6  -5 2613.23  199.06
   0   6  -5 2548.94  146.19
   0  -6  -5 2715.96  124.26
   0   6   6 2662.65  141.37
   0   6   6 2466.56  128.14
   0   6  -6 2421.83  209.79
   0   6  -6 2497.02  122.17
   0  -6  -6 2548.01  118.13
   0   6   7 1645.91  102.66
   0   6   7 1685.30  122.57
   0   6  -7 1764.66  201.82
   0   6  -7 1604.14   88.55
   0  -6  -7 1637.32  102.99
   0   6   8  434.07   50.90
   0   6   8  389.44   40.57
   0   6  -8  399.74   80.37
   0   6  -8  409.71   42.08
   0  -6  -8  332.69   31.20
   0   6   9  903.95   75.40
   0   6   9  832.17   56.91
   0   6  -9  891.49  106.00
   0   6  -9  876.86   62.02
   0  -6  -9  887.88   51.94
   0   6  10  317.01   50.55
   0   6  10  306.40   45.85
   0   6 -10  290.06   75.88
   0   6 -10  310.20   39.53
   0  -6 -10  284.91   43.93
   0   6  11 1813.15  114.26
   0   6  11 1560.80   79.41
   0   6 -11 1788.26   95.65
   0  -6 -11 1403.70   76.23
   0   6  12 1708.25  145.11
   0   6 -12 1721.67  117.77
   0  -6  12 1702.51  105.70
   0  -6 -12 1178.50   72.89
   0   6  13 3150.20  167.20
   0   6 -13 3221.75  152.26
   0  -6  13 3011.07  162.54
   0   7   0    8.19   12.40
   0   7   0    0.44   11.15
   0   7   1   28.37   28.59
   0   7   1   21.96   18.76
   0   7  -1   44.33   17.96
   0   7   2 2418.62  113.67
   0   7   2 2906.25  140.31
   0   7  -2 2556.62  133.62
   0   7  -2 2544.94  143.52
   0   7   3  508.07   38.72
   0   7   3  505.02   47.78
   0   7  -3  536.87   55.19
   0   7  -3  551.47   42.81
   0   7   4 2575.56  138.16
   0   7  -4 2726.36  160.17
   0   7  -4 2742.85  131.83
   0   7   5 2495.42  135.13
   0   7  -5 2674.89  166.17
   0   7  -5 2629.68  128.93
   0  -7  -5 2397.53  114.06
   0   7   6  407.23   39.64
   0   7   6  440.27   73.06
   0   7  -6  439.24   71.43
   0   7  -6  443.44   41.88
   0  -7  -6  363.08   30.75
   0   7   7  250.92   35.43
   0   7   7  241.34   37.59
   0   7  -7  223.52   65.55
   0   7  -7  245.06   33.91
   0  -7  -7  174.94   38.23
   0   7   8  110.07   30.42
   0   7   8  105.18   29.51
   0   7  -8   95.60   57.37
   0   7  -8  101.04   28.87
   0  -7  -8  135.82   20.12
   0   7   9  386.79   46.71
   0   7   9  323.74   38.29
   0   7  -9  382.61   80.47
   0   7  -9  388.56   41.66
   0  -7  -9  376.95   29.15
   0   7  10 1653.41   97.45
   0   7  10 1517.61  105.61
   0   7 -10 1678.37   92.29
   0  -7 -10 1522.39   77.94
   0   7  11  202.63   35.23
   0   7  11  188.26   23.69
   0   7 -11  225.99   32.47
   0  -7  11  217.69   45.95
   0   7  12  546.19   39.86
   0   7 -12  793.07   52.30
   0  -7  12  928.99   70.48
   0   8   0 3696.33  196.30
   0   8   0 3918.84  181.22
   0   8   1 2739.95  128.92
   0   8  -1 2813.11  132.92
   0   8  -1 2761.37  123.87
   0   8   2 2112.09  102.07
   0   8  -2 2164.98  106.53
   0   8   3   58.56   18.80
   0   8  -3   48.72   23.44
   0   8  -3   71.41   21.82
   0   8   4  448.42   77.57
   0   8  -4  463.03   55.37
   0   8  -4  486.00   62.62
   0  -8  -4  547.85   37.09
   0   8   5 2819.83  186.02
   0   8  -5 2874.93  169.50
   0   8  -5 2847.52  164.75
   0  -8  -5 2918.48  133.89
   0   8   6 1567.97   95.26
   0   8  -6 1683.82  120.51
   0   8  -6 1666.83   88.51
   0  -8  -6 1647.49   94.97
   0   8   7  148.11   32.88
   0   8  -7  153.64   50.34
   0   8  -7  160.86   27.23
   0  -8  -7  101.23   17.98
   0   8  -8  130.92   27.57
   0   8   8  137.02   30.97
   0  -8  -8  157.14   17.43
   0  -8   8    4.56   39.63
   0   8  -9 1027.92   62.93
   0   8   9  883.65   90.36
   0  -8  -9  826.63   57.57
   0  -8   9 1105.13   85.60
   0   8  10  350.06   38.48
   0   8 -10  421.72   39.12
   0  -8  10  507.86   58.29
   0   9   0    2.85   17.04
   0   9   0  135.32   25.41
   0   9   1 1040.95   57.46
   0   9  -1  988.73   74.59
   0   9  -2  232.15   27.19
   0   9   3 3146.85  154.89
   0   9  -3 3231.05  150.28
   0  -9  -3 3063.23  142.05
   0   9   4 1695.11   94.08
   0   9  -4 1717.12   86.85
   0  -9  -4 1575.81   74.68
   0   9  -5  415.26   36.95
   0   9   5  420.93   46.02
   0  -9  -5  449.83   28.52
   0  -9   5  446.61   39.44
   0   9  -6  306.68   30.68
   0   9   6  312.23   37.85
   0  -9  -6  204.81   19.10
   0  -9   6  217.79   35.26
   0   9   7  131.91   30.88
   0   9  -7  128.58   24.37
   0  -9   7  139.06   32.03
   0   9   8 1007.39  102.73
   0   9  -8 1033.25   59.68
   0  -9   8  995.11   72.08
   0   9   9  451.20   44.88
   0   9  -9  497.55   36.22
   0  -9   9  415.65   47.22
   0  10   0  845.46   45.59
   0  10   1 1959.73   93.50
   0  10  -2 1230.98   62.10
   0  10   3  554.72   43.67
   0  10  -3  604.84   39.13
   0  10   4  466.28   43.91
   0  10  -4  477.48   34.08
   0  10   5  803.79   56.40
   0  10  -5  776.10   59.96
   0  10   6   77.26   48.26
   0  10  -6   65.00   24.67
   1   0 -16  151.38   31.66
  -1   0  16    5.19   53.50
   1   0 -15  424.18   37.27
  -1   0  15  430.83   46.11
  -1   0  15  424.89   55.36
   1   0 -14 1289.32   71.56
  -1   0  14  766.81   97.00
  -1   0  14  818.63   78.37
   1   0 -13 1646.17  110.84
  -1   0  13 1624.43  104.91
  -1   0  13 1518.13  149.95
   1   0 -12 2984.90  144.01
  -1   0  12 2884.35  162.31
  -1   0  12 2790.37  160.87
   1   0 -11  107.96   24.57
  -1   0  11  107.40   59.22
  -1   0  11   88.85   37.84
   1   0 -10  372.29   34.69
  -1   0  10  371.63   72.62
  -1   0  10  336.73   46.75
   1   0  -9  804.16   68.75
   1   0  -9  726.72   48.44
  -1   0   9  837.64   63.51
  -1   0   9  856.42   71.21
  -1   0   9  780.47   61.98
   1   0  -8   54.64   16.87
   1   0  -8   45.87   17.17
   1   0  -8   34.84    8.45
   1   0  -8   46.21   11.69
   1   0  -8   54.56   26.64
  -1   0   8   38.47   25.97
  -1   0   8   45.78   20.67
  -1   0   8    8.77   19.26
  -1   0   8   63.06   26.65
   1   0  -7 8627.63  411.14
   1   0  -7 9519.20  429.92
   1   0  -7 9537.77  410.81
   1   0  -7 8916.66  433.43
  -1   0   7 9647.76  464.39
  -1   0   7 9251.99  419.79
  -1   0   7 9183.92  420.23
  -1   0   7 8555.85  459.47
   1   0  -6 2192.07  113.09
   1   0  -6 2157.56  108.88
   1   0  -6 2185.16   97.25
   1   0  -6 2392.38   91.03
   1   0  -6 2349.15  166.06
  -1   0   6 2114.90  116.51
  -1   0   6 2180.36   98.27
  -1   0   6 2171.97   99.89
  -1   0   6 2029.39  151.94
   1   0  -5   20.75   19.14
   1   0  -5    8.38   19.61
   1   0  -5   -3.18   13.07
   1   0  -5    9.53    8.83
   1   0  -5    3.45   20.92
  -1   0   5    8.62   22.50
  -1   0   5   19.83   27.43
  -1   0   5    7.90   13.11
  -1   0   5    1.83   37.25
   1   0  -427396.07 1454.58
   1   0  -428068.03 1511.28
   1   0  -427787.50 1441.07
   1   0  -429009.41 1489.91
   1   0  -428528.70 1518.72
  -1   0   427732.88 1491.31
  -1   0   427425.33 1456.58
  -1   0   426086.40 1394.30
  -1   0   427496.64 1418.38
  -1   0   427876.36 1552.23
   1   0  -322464.02 1171.62
   1   0  -323889.51 1195.44
   1   0  -322753.29 1185.65
   1   0  -327055.34 1469.55
  -1   0   324364.73 1269.35
  -1   0   323154.20 1213.09
  -1   0   322127.79 1113.03
  -1   0   325658.77 1280.36
  -1   0   324453.24 1349.74
   1   0  -2 4360.33  185.46
   1   0  -2 4147.65  154.77
   1   0  -2 4237.23  166.20
   1   0  -2 4122.52  177.17
  -1   0   2 4368.47  227.77
  -1   0   2 4295.64  245.48
  -1   0   2 4092.38  152.31
  -1   0   2 4436.67  173.67
  -1   0   2 4436.79  188.82
   1   0  -119467.08  936.68
   1   0  -117779.68  841.22
   1   0  -119339.98  862.81
   1   0  -116960.20  786.03
   1   0  -118735.43  874.42
  -1   0   118131.89  850.62
  -1   0   117829.56  875.82
  -1   0   120026.84  899.35
  -1   0   118322.67  857.58
   1   0   0   52.33   19.69
   1   0   0   56.20   32.45
   1   0   0   78.85   20.27
   1   0   0   61.81   15.69
  -1   0   0   54.43   35.61
  -1   0   0   49.25   18.20
  -1   0   0   67.20   13.03
  -1   0   0   72.85   11.56
  -1   0   0   61.51   28.81
   1   0   1 5927.42  266.14
   1   0   1 5790.50  276.95
   1   0   1 5631.28  219.73
   1   0   1 4872.34  198.79
   1   0   1 5619.52  274.10
  -1   0  -1 5623.53  259.78
  -1   0  -1 5902.41  281.74
  -1   0  -1 5694.96  222.87
  -1   0  -1 5878.65  219.54
  -1   0  -1 5902.06  247.12
   1   0   2  585.83   70.23
   1   0   2  542.19   81.51
   1   0   2  600.89   52.87
   1   0   2  588.57   50.64
   1   0   2  584.94   38.47
   1   0   2  568.19   63.78
   1   0   2  515.80   60.74
  -1   0  -2  565.97   87.66
  -1   0  -2  606.85   48.54
  -1   0  -2  598.92   27.87
   1   0   345397.64 2662.79
   1   0   347968.90 2854.00
   1   0   346016.96 2713.58
   1   0   344583.79 2563.93
   1   0   343893.40 2463.84
   1   0   348653.65 2915.85
   1   0   344767.81 2616.96
  -1   0  -343719.11 2533.82
  -1   0  -344511.55 2555.30
  -1   0  -344729.74 2513.39
   1   0   4  115.25   61.55
   1   0   4  117.55   45.45
   1   0   4   97.87   37.72
   1   0   4   79.13   23.40
   1   0   4   80.55   12.39
   1   0   4   78.42   30.52
   1   0   4   81.35   31.02
  -1   0  -4   90.22   41.41
  -1   0  -4  107.57   23.25
  -1   0  -4   77.45   13.20
   1   0   5 3403.70  175.45
   1   0   5 3268.91  188.90
   1   0   5 3324.94  167.13
   1   0   5 3511.05  157.82
   1   0   5 3465.18  167.38
   1   0   5 3423.86  168.42
  -1   0  -5 3332.30  148.10
  -1   0  -5 3425.12  181.92
  -1   0  -5 3304.04  124.06
   1   0   6 6405.31  314.21
   1   0   6 6160.69  324.59
   1   0   6 6547.54  287.15
   1   0   6 6699.01  357.84
   1   0   6 6801.95  322.52
  -1   0  -6 6596.18  318.02
  -1   0  -6 6757.74  300.24
  -1   0  -6 6337.03  252.01
   1   0   7 1297.89   86.34
   1   0   7 1230.14   56.53
   1   0   7 1271.57   78.08
   1   0   7 1262.07   80.21
  -1   0  -7 1200.85   60.64
  -1   0  -7 1300.28   68.55
  -1   0  -7 1263.72   70.68
   1   0   8  307.28   74.49
   1   0   8  332.26   42.61
   1   0   8  284.88   44.35
  -1   0  -8  308.11   33.96
   1   0   9  334.11   51.82
   1   0   9  331.79   46.71
  -1   0  -9  313.02   36.85
   1   0  10 3654.35  204.85
   1   0  10 3606.46  236.94
  -1   0 -10 3916.19  224.56
   1   0  11   66.61   37.24
   1   0  11   51.37   34.20
  -1   0 -11   50.23   26.53
   1   0  12 3266.45  234.11
   1   0  12 3055.83  172.31
  -1   0 -12 2994.12  154.15
   1   0  13  818.23   78.05
   1   0  13  754.82   71.27
  -1   0 -13  790.33   59.03
   1   0  14 1174.35   89.43
   1   0  14 1187.22  123.10
  -1   0 -14 1204.89  103.26
   1   0  15    1.18   34.68
   1   0  15   13.66   20.52
  -1   0 -15    8.01   15.77
   1   1 -16  116.84   21.27
  -1   1  16  123.84   59.81
   1   1 -15   70.14   25.35
  -1   1  15  118.69   35.29
  -1   1  15   97.67   38.48
   1  -1 -15  139.03   21.68
  -1  -1  15  146.55   34.30
  -1   1  14 1846.50  158.09
   1   1 -14 1890.51  101.19
  -1   1  14 1853.12  119.75
  -1  -1  14 1739.40  122.01
   1  -1 -14 1863.77  111.68
  -1  -1  14 1743.23  109.65
   1   1 -13  752.92   54.24
  -1   1  13  726.97   74.75
  -1   1  13  699.17  108.08
   1  -1 -13  719.22   49.10
  -1  -1  13  637.17   54.27
  -1  -1  13  672.75   64.89
  -1   1  12 1000.61   87.29
   1   1 -12  992.86   87.93
  -1   1  12  988.63   83.27
   1  -1 -12 1073.79   64.18
  -1  -1  12 1111.38  116.57
  -1  -1  12 1114.82   74.52
   1   1 -11  870.48   58.06
  -1   1  11  795.39   73.44
  -1   1  11  864.81   79.50
  -1  -1  11  983.06   95.08
   1  -1 -11  893.17   78.05
  -1  -1  11  934.18   72.51
  -1   1  10  943.84  119.19
   1   1 -10  928.49   57.67
  -1   1  10  892.70   71.96
  -1  -1  10 1026.90   65.79
   1  -1 -10 1034.06   57.87
  -1  -1  10 1006.48   71.79
   1   1  -9 1069.16   66.64
   1   1  -9 1051.75   57.75
  -1   1   9 1104.89  112.87
  -1   1   9 1041.96   70.55
   1  -1  -9  876.83   50.85
  -1  -1   9  852.93   58.05
  -1  -1   9  847.88   49.30
  -1  -1   9  820.39   62.98
   1   1  -8 4259.63  204.71
   1   1  -8 3937.46  195.84
  -1   1   8 3848.37  163.51
   1   1  -8 4217.45  187.61
  -1   1   8 4146.45  211.98
  -1   1   8 3757.06  223.23
   1  -1  -8 4550.26  196.33
   1  -1  -8 4268.55  176.35
  -1  -1   8 4275.44  200.81
  -1  -1   8 4209.95  211.21
  -1  -1   8 4431.07  199.35
   1  -1  -8 4414.55  213.23
   1  -1  -8 4022.72  198.14
  -1  -1   8 4469.68  210.56
   1   1  -7 2624.08   94.44
   1   1  -7 2805.75  142.33
  -1   1   7 2675.70  120.98
   1   1  -7 2667.13  119.18
   1   1  -7 2633.53   98.00
  -1   1   7 2513.21   96.78
  -1   1   7 2585.92  107.57
   1   1  -7 2853.33  139.15
  -1   1   7 2642.47  143.13
  -1   1   7 2829.01  172.24
   1  -1  -7 2430.22  129.40
   1  -1  -7 2470.19  115.86
   1  -1  -7 2442.43  129.62
  -1  -1   7 2300.66  114.43
  -1  -1   7 2378.63  112.89
   1  -1  -7 2489.75  109.58
  -1  -1   7 2274.37  115.29
  -1  -1   7 2490.69  126.34
   1   1  -6 7767.08  316.54
   1   1  -6 7763.59  430.73
  -1   1   6 7233.50  336.23
   1   1  -6 7501.45  334.46
   1   1  -6 7842.14  338.34
  -1   1   6 7433.02  310.99
  -1   1   6 7731.47  323.77
  -1   1   6 6725.60  323.91
   1   1  -6 7922.80  406.74
  -1   1   6 7498.90  369.16
   1  -1  -6 8351.91  388.39
   1  -1  -6 7646.53  329.86
   1  -1  -6 7788.97  369.01
  -1  -1   6 7403.22  346.26
  -1  -1   6 7208.50  353.93
   1  -1  -6 7518.68  353.48
  -1  -1   6 7076.29  368.34
  -1  -1   6 7034.88  334.05
   1   1  -5  980.28   47.92
   1   1  -5  916.94  112.16
  -1   1   5 1002.20   49.54
   1   1  -5  977.87   53.70
   1   1  -5  950.26   52.37
  -1   1   5  979.07   41.40
  -1   1   5  972.03   53.68
  -1   1   5 1004.49   78.86
   1   1  -5 1104.96   67.08
  -1   1   5 1064.72   66.70
  -1  -1   5  844.84   81.71
   1  -1  -5  844.33   45.72
   1  -1  -5  839.15  105.03
   1  -1  -5  833.09  100.04
  -1  -1   5  829.68   49.36
   1  -1  -5  824.05   45.20
  -1  -1   5  778.87   98.25
  -1  -1   5  836.34   62.15
   1   1  -454811.83 3182.01
   1   1  -449416.46 3001.56
  -1   1   455197.67 3242.84
   1   1  -450785.83 2990.87
   1   1  -452205.92 3080.47
  -1   1   451114.04 2975.18
  -1   1   449199.66 2879.10
  -1   1   450237.26 3045.51
   1   1  -455805.94 3315.65
  -1   1   452295.77 3114.93
  -1  -1   452718.95 3124.74
   1  -1  -453637.65 3156.81
   1  -1  -449435.74 2977.92
   1  -1  -448108.01 2878.02
  -1  -1   450848.15 3027.30
   1  -1  -451748.37 3032.94
  -1  -1   451447.97 3106.23
  -1  -1   454480.18 3242.36
  -1   1   374302.14 4732.66
   1   1  -369401.47 4522.44
  -1   1   374534.81 4787.89
   1   1  -373648.87 4662.55
   1   1  -374672.29 4724.28
  -1   1   374562.45 4721.18
   1   1  -386564.93 5432.21
  -1   1   372601.44 4829.45
   1   1  -377204.64 4928.42
  -1   1   379567.48 5070.21
  -1  -1   372322.71 4629.93
   1  -1  -372829.22 4688.36
  -1  -1   372997.17 4724.03
   1  -1  -375923.14 4844.90
  -1  -1   372448.40 4580.20
   1  -1  -373843.14 4688.71
   1  -1  -367445.02 4459.26
  -1  -1   377241.47 4936.92
  -1   1   216155.74  815.13
   1   1  -216124.58  759.35
   1   1  -217954.39 1015.66
  -1   1   216858.45  845.73
  -1   1   216039.85  808.47
   1   1  -216222.04  769.38
   1   1  -217560.13  837.62
  -1   1   216242.68  791.02
   1  -1  -216780.11  836.13
   1  -1  -216574.86  768.24
   1  -1  -216686.33  789.87
   1  -1  -217634.84  874.39
  -1  -1   217352.38  872.89
  -1  -1   216113.83  755.98
  -1  -1   216991.36  794.17
  -1  -1   216951.22  796.64
   1  -1  -217127.74  774.89
  -1  -1   216222.41  783.56
  -1   1   136732.58 1912.12
  -1   1   134634.76 1862.50
   1   1  -134795.35 1925.10
   1   1  -136000.70 1911.11
  -1   1   137441.57 1972.07
   1   1  -136176.02 1942.77
  -1   1   131847.75 1759.63
   1   1  -136343.36 1943.85
  -1   1   134769.63 1889.90
   1  -1  -134712.96 1855.30
   1  -1  -137757.58 2010.57
  -1  -1   134628.58 1898.57
   1  -1  -134641.96 1839.20
   1  -1  -134433.83 1947.24
  -1  -1   136169.81 1935.13
  -1  -1   133343.18 1774.73
   1  -1  -136229.95 1895.91
  -1  -1   135937.37 1926.96
   1   1   0 2352.35  104.54
  -1   1   0 2414.22   82.98
   1   1   0 2481.12   95.97
  -1   1   0 2468.06  105.67
  -1   1   0 2394.29  165.48
   1   1   0 2468.99  123.02
   1   1   0 2516.23  135.70
   1   1   0 2797.84  114.53
  -1   1   0 2466.75  114.58
  -1   1   0 2548.08   88.66
   1  -1   0 2260.62  114.71
   1  -1   0 2316.77   94.82
   1  -1   0 2201.55   81.25
  -1  -1   0 2197.88   92.48
   1  -1   0 2243.74   88.99
  -1  -1   0 2284.08   92.43
   1  -1   0 2217.05  105.36
  -1  -1   0 2407.17  133.78
  -1  -1   0 2345.79  101.67
   1   1   1  571.99   87.96
  -1   1  -1  593.61   57.93
   1   1   1  598.81   35.70
   1   1   1  708.81   58.15
  -1   1  -1  626.68   30.23
   1   1   1  572.00   47.24
   1   1   1  603.29   74.42
  -1   1  -1  596.67  109.40
  -1   1  -1  622.31   71.38
   1  -1   1  969.68  111.24
  -1  -1  -1  973.03   57.51
   1  -1   1 1010.96   46.85
  -1  -1  -1  991.54   43.65
   1  -1   1 1010.43   31.55
   1  -1   1 1006.54   76.83
  -1  -1  -1 1018.94   55.79
  -1  -1  -1  836.44   78.05
   1  -1   1 1073.52   55.23
  -1  -1  -1  945.59   63.21
   1   1   218251.12  936.04
   1   1   218999.01  924.87
   1   1   219858.08 1006.42
  -1   1  -218563.99  981.46
   1   1   219211.50  933.29
  -1   1  -219420.61  993.57
  -1   1  -218511.85  900.62
   1   1   219251.61  972.16
   1  -1   218868.09  962.91
   1  -1   219131.74  926.09
  -1  -1  -219515.72  923.79
  -1  -1  -218960.28  960.52
   1  -1   219575.54 1010.34
  -1  -1  -219019.19 1000.82
  -1  -1  -219015.59  924.98
   1   1   317031.99  862.28
   1   1   317528.02  817.25
   1   1   317618.41  881.06
  -1   1  -317114.33  863.09
   1   1   317339.95  822.96
  -1   1  -317067.08  820.47
   1   1   318251.99  905.41
   1  -1   317650.26  862.65
   1  -1   317218.18  865.65
   1  -1   317640.92  842.61
  -1  -1  -317397.16  840.32
  -1  -1  -317518.70  818.32
  -1  -1  -316802.71  820.95
  -1  -1  -317401.75  827.72
  -1   1  -4  614.06   44.39
   1   1   4  646.05   66.06
   1   1   4  618.30   78.93
   1   1   4  689.10   43.08
   1   1   4  646.56   57.99
  -1   1  -4  599.47   59.28
   1   1   4  647.73   48.18
   1   1   4  688.70   59.74
   1  -1   4  866.34   60.89
   1  -1   4  862.97   55.53
  -1  -1  -4  842.45   36.48
   1  -1   4  980.78   75.51
  -1  -1  -4  891.63   79.06
   1  -1   4  831.82   63.38
  -1  -1  -4  768.19   51.92
  -1  -1  -4  819.54   37.81
  -1   1  -5 6271.00  275.47
   1   1   5 6340.58  308.42
   1   1   5 6592.89  338.48
   1   1   5 6259.11  267.87
  -1   1  -5 6001.27  285.61
   1   1   5 6249.43  294.75
   1   1   5 6365.86  259.31
   1   1   5 6081.24  292.17
   1  -1   5 6514.34  330.92
   1  -1   5 6129.79  273.03
   1  -1   5 6330.10  291.74
  -1  -1  -5 5954.49  260.95
  -1  -1  -5 6584.14  289.08
   1  -1   5 6366.09  298.58
  -1  -1  -5 5459.95  252.91
  -1  -1  -5 6297.86  257.45
   1   1   6 6931.34  302.95
   1   1   6 7474.28  364.21
   1   1   6 6308.51  341.29
   1   1   6 6892.77  298.06
   1   1   6 7144.84  345.08
  -1   1  -6 6665.52  352.73
   1   1   6 7844.45  367.54
  -1   1  -6 7283.55  327.06
   1  -1   6 7181.94  389.27
   1  -1   6 7164.73  336.12
   1  -1   6 7318.54  368.13
   1  -1   6 7453.18  336.31
  -1  -1  -6 6842.25  293.14
  -1  -1  -6 7678.63  342.10
   1  -1   6 7354.82  340.50
  -1  -1  -6 7232.37  329.71
  -1  -1  -6 7129.35  298.05
   1   1   7  777.06   94.41
   1   1   7  730.01  115.24
   1   1   7  742.34   80.50
  -1   1  -7  737.76   53.46
  -1   1  -7  726.18   73.08
   1   1   7  780.97   64.46
   1  -1   7  973.61   58.22
   1  -1   7  957.95   67.22
   1  -1   7  851.23   58.85
   1  -1   7  896.86   70.53
  -1  -1  -7  943.94   78.71
   1  -1   7  976.31   61.09
  -1  -1  -7  896.22   55.74
  -1   1  -8 2486.57  124.79
   1   1   8 2502.52  147.41
  -1   1  -8 2446.03  147.58
   1   1   8 2247.23  127.58
   1  -1   8 2435.45  126.49
   1  -1   8 2648.97  134.52
   1  -1   8 2886.54  146.39
  -1  -1  -8 2853.92  129.47
   1  -1   8 2798.43  126.82
  -1   1  -9  117.75   27.13
   1   1   9  133.45   41.76
   1   1   9  119.60   36.36
  -1   1  -9  101.30   34.69
   1  -1   9   88.39   50.50
  -1  -1  -9  107.29   26.36
   1  -1   9   94.90   55.76
   1   1  10 2509.06  155.47
   1   1  10 2400.85  142.00
  -1   1 -10 2363.86  123.56
   1  -1  10 2413.76  141.42
   1  -1  10 2347.59  168.00
  -1  -1 -10 2394.23  123.45
   1   1  11 2926.53  216.58
   1   1  11 3021.30  227.12
  -1   1 -11 2894.63  146.89
   1  -1  11 2920.60  166.94
  -1  -1 -11 2858.39  176.76
   1  -1  11 2805.94  156.36
   1   1  12  687.74   71.21
   1   1  12  689.85   80.65
  -1   1 -12  684.23   56.52
   1  -1  12  742.48   67.18
  -1  -1 -12  693.13   55.60
   1  -1  12  677.95   63.43
   1   1  13  463.68   66.65
   1   1  13  438.59   59.70
  -1   1 -13  498.95   74.09
   1  -1  13  410.01   53.23
   1  -1  13  398.71   79.15
  -1  -1 -13  403.65   43.27
   1   1  14   89.68   40.58
   1   1  14   81.52   63.84
  -1   1 -14   88.93   28.32
   1  -1  14  110.11   31.06
   1  -1  14  116.03   31.79
  -1  -1 -14  100.34   43.64
   1   1  15 1932.18  115.58
   1   1  15 2092.58  116.61
  -1   1 -15 1700.39   96.45
   1  -1  15 1940.23  101.89
  -1  -1 -15 2041.62   98.68
  -1   2  15  411.85   49.38
   1   2 -15  367.40   57.26
  -1   2  15  396.37   54.88
   1  -2 -15  315.56   26.55
  -1  -2  15  337.80   64.00
  -1   2  14  463.67   64.28
  -1   2  14  423.87   56.59
   1  -2 -14  532.12   36.70
  -1  -2  14  502.80   49.60
  -1   2  13  897.60  110.37
   1   2 -13  901.92   60.76
  -1   2  13  931.64  127.48
   1  -2 -13  740.55   49.88
  -1  -2  13  759.82   63.16
  -1   2  12 2088.19  125.84
   1   2 -12 2093.43  110.95
  -1   2  12 2047.73  139.58
   1  -2 -12 1985.87  122.74
  -1  -2  12 2002.32  116.05
  -1   2  11  580.69   69.00
   1   2 -11  589.08   47.26
  -1   2  11  520.97   53.75
  -1  -2  11  314.02   51.87
   1  -2 -11  344.80   34.75
  -1  -2  11  307.28   71.15
   1   2 -10 3193.16  174.46
  -1   2  10 3008.83  178.25
   1   2 -10 3207.82  182.81
  -1   2  10 3146.68  164.64
   1  -2 -10 3097.58  143.30
  -1  -2  10 2911.66  181.49
  -1  -2  10 2910.25  142.33
   1   2  -9 4560.34  239.07
   1   2  -9 4711.53  239.13
  -1   2   9 4305.41  191.08
  -1   2   9 4369.32  237.97
  -1   2   9 4574.41  223.65
   1  -2  -9 4988.69  219.90
  -1  -2   9 4646.44  216.54
   1  -2  -9 4673.70  211.75
  -1  -2   9 4663.49  224.79
   1   2  -8  833.33   49.55
   1   2  -8  776.26   68.13
   1   2  -8  740.42   51.22
  -1   2   8  731.74   50.02
  -1   2   8  732.29   79.54
  -1   2   8  728.54   71.08
   1  -2  -8  682.66   62.42
  -1  -2   8  718.78   44.83
   1  -2  -8  708.96   57.23
  -1  -2   8  734.69   73.71
   1  -2  -8  690.74   36.51
  -1  -2   8  710.23   79.94
  -1  -2   8  695.07   50.60
   1   2  -7 4741.21  218.62
   1   2  -7 4471.00  286.36
  -1   2   7 4436.34  287.56
   1   2  -7 4347.74  195.89
  -1   2   7 4301.93  190.65
  -1   2   7 4237.91  203.66
   1  -2  -7 5104.55  217.16
  -1  -2   7 4859.17  238.69
   1  -2  -7 5269.62  222.08
  -1  -2   7 4837.08  232.08
  -1  -2   7 4879.68  214.78
   1  -2  -7 4841.45  226.92
   1  -2  -7 5041.53  241.42
  -1  -2   7 4970.52  225.98
  -1   2   6 7324.84  325.29
   1   2  -6 6154.05  321.65
   1   2  -6 6935.56  353.19
   1   2  -6 7091.78  318.16
   1   2  -6 7160.87  294.38
  -1   2   6 7164.51  331.96
   1   2  -6 6991.66  289.05
  -1   2   6 7168.66  423.10
   1  -2  -6 7987.86  351.01
  -1  -2   6 7461.06  348.01
   1  -2  -6 8320.10  380.27
  -1  -2   6 7722.87  369.06
  -1  -2   6 7398.30  330.71
   1  -2  -6 7952.94  422.15
   1  -2  -6 7987.51  345.05
  -1  -2   6 7924.20  359.75
  -1   2   521086.01 1081.21
   1   2  -519267.35 1040.60
   1   2  -520992.42 1032.42
   1   2  -520270.15 1059.02
   1   2  -521612.05 1057.55
  -1   2   518167.74  962.63
   1   2  -522359.25 1139.59
  -1   2   520273.24 1089.06
   1  -2  -523865.75 1216.44
  -1  -2   522118.86 1110.12
  -1  -2   522012.42 1156.31
  -1  -2   522195.20 1147.13
   1  -2  -522499.74 1150.30
   1  -2  -522387.33 1171.83
  -1  -2   524403.17 1236.85
  -1   2   4 8685.70  393.82
   1   2  -4 9693.01  477.46
   1   2  -4 9280.87  414.26
   1   2  -4 9061.47  385.71
  -1   2   4 9243.92  414.91
   1   2  -4 9711.32  463.44
  -1   2   4 9273.35  457.49
   1  -2  -4 9352.10  402.79
   1  -2  -4 9171.84  447.82
  -1  -2   4 8693.64  375.98
  -1  -2   4 8866.67  496.86
  -1  -2   4 8917.20  394.70
   1  -2  -4 8852.31  401.42
   1  -2  -4 9428.79  451.29
  -1  -2   4 9093.19  442.20
  -1   2   312002.92  543.59
   1   2  -311633.43  577.63
   1   2  -311641.96  525.30
   1   2  -311551.34  510.13
  -1   2   311361.60  560.83
   1   2  -311994.00  537.40
  -1   2   311864.59  529.21
  -1   2   311319.99  481.21
   1  -2  -310191.72  473.20
  -1  -2   310155.73  453.18
  -1  -2   310508.46  523.19
   1  -2  -311408.22  512.13
  -1  -2   310598.66  464.81
   1  -2  -310845.72  533.43
  -1  -2   310788.03  520.38
  -1  -2   310472.42  479.42
  -1   2   2 6584.73  270.90
  -1   2   2 6518.82  290.37
   1   2  -2 6893.19  343.39
   1   2  -2 6543.85  329.57
  -1   2   2 6702.18  406.13
   1   2  -2 6564.64  320.08
  -1   2   2 6878.22  306.94
   1   2  -2 6864.71  293.67
  -1   2   2 6630.03  302.06
   1  -2  -2 7139.56  295.92
   1  -2  -2 7583.09  330.32
  -1  -2   2 7189.68  284.24
   1  -2  -2 7541.63  358.59
  -1  -2   2 7707.56  365.49
  -1  -2   2 6858.73  296.79
  -1  -2   2 7231.03  270.65
  -1  -2   2 7567.02  314.08
   1  -2  -2 7027.89  282.51
   1  -2  -2 7141.84  314.80
  -1  -2   2 7602.92  354.90
   1   2  -1  113.39   30.76
   1   2  -1  118.09   15.61
   1   2  -1  119.97   22.90
   1   2  -1  139.33   86.85
  -1   2   1  114.12    9.55
   1   2  -1  101.28   29.50
  -1   2   1  114.17   45.15
  -1   2   1  117.38   36.74
  -1   2   1  150.01   28.37
  -1   2   1   98.03   48.97
   1  -2  -1  131.11   40.88
  -1  -2   1  182.46   13.41
  -1  -2   1  145.46   31.06
   1  -2  -1  169.12   38.00
   1  -2  -1  153.45   20.39
  -1  -2   1  148.33   26.45
  -1  -2   1  143.55   29.08
   1  -2  -1  130.65   16.08
  -1  -2   1  151.42   41.51
   1   2   0 3357.46  134.77
  -1   2   0 3174.92  130.26
  -1   2   0 3335.05  167.77
   1   2   0 3511.66  167.68
  -1   2   0 3312.94  173.21
   1   2   0 3251.92  150.41
   1   2   0 3404.46  206.52
   1   2   0 3555.48  180.65
  -1   2   0 3298.94  163.28
   1  -2   0 3254.32  154.85
  -1  -2   0 3275.40  137.77
   1  -2   0 3398.24  150.47
  -1  -2   0 3245.77  146.34
   1  -2   0 3282.80  131.19
  -1  -2   0 3587.74  167.92
   1  -2   0 3429.80  193.47
  -1  -2   0 3335.04  144.56
   1   2   1  342.72   40.12
  -1   2  -1  345.66   31.68
  -1   2  -1  352.14   96.54
   1   2   1  351.72   69.31
   1   2   1  369.42   43.13
  -1   2  -1  397.57   36.58
   1   2   1  356.95   44.91
  -1   2  -1  341.25   56.66
   1  -2   1  536.13   57.61
   1  -2   1  716.02   44.42
  -1  -2  -1  525.66   55.89
   1  -2   1  564.62   21.87
  -1  -2  -1  523.17   37.49
   1  -2   1  567.71   26.92
   1  -2   1  509.16   43.95
  -1  -2  -1  525.87   44.36
  -1  -2  -1  504.12   47.02
   1  -2   1  520.10   40.02
  -1  -2  -1  547.35   43.27
   1   2   227312.13 1451.36
  -1   2  -226668.91 1404.56
   1   2   227054.64 1422.25
   1   2   228574.63 1480.61
  -1   2  -227535.78 1481.28
   1   2   227198.62 1420.62
   1   2   228710.46 1502.20
  -1   2  -228642.97 1410.14
  -1   2  -225488.69 1376.61
   1  -2   226426.92 1345.88
   1  -2   225349.55 1364.24
  -1  -2  -226637.87 1322.56
  -1  -2  -226116.59 1371.11
   1  -2   225999.16 1343.51
  -1  -2  -225762.09 1388.14
  -1  -2  -225044.71 1314.12
   1  -2   228278.19 1409.85
   1   2   333120.04 1915.70
   1   2   333081.48 1821.46
  -1   2  -334516.98 1936.34
   1   2   334299.58 1863.72
  -1   2  -332154.88 1735.94
   1   2   335817.24 2016.92
  -1   2  -336475.14 2108.21
   1  -2   332318.26 1777.02
   1  -2   332511.75 1818.01
   1  -2   332684.53 1785.11
  -1  -2  -332280.90 1781.87
  -1  -2  -332152.16 1754.02
  -1  -2  -333105.28 1802.71
  -1   2  -4 6384.87  312.72
   1   2   4 6345.55  308.75
   1   2   4 6563.10  299.85
   1   2   4 6779.49  290.48
  -1   2  -4 6341.23  275.98
   1   2   4 6826.43  311.59
   1  -2   4 6244.00  287.22
   1  -2   4 6749.34  289.62
   1  -2   4 6104.10  296.87
   1  -2   4 5997.95  262.30
  -1  -2  -4 6398.74  281.81
  -1  -2  -4 6190.36  292.71
  -1  -2  -4 6090.42  274.90
  -1  -2  -4 6307.23  273.41
   1   2   514316.08  728.52
  -1   2  -514104.54  718.23
   1   2   514515.25  688.91
   1   2   514820.87  730.60
   1   2   514465.96  719.74
  -1   2  -514185.86  679.70
   1  -2   514584.05  717.73
   1  -2   514388.12  688.05
   1  -2   514728.69  712.25
   1  -2   514902.57  747.48
  -1  -2  -514754.59  707.95
  -1  -2  -513270.95  648.76
  -1  -2  -514859.43  706.82
   1   2   6 6494.70  309.03
   1   2   6 6613.19  329.60
   1   2   6 6493.58  338.23
  -1   2  -6 7019.57  379.27
   1   2   6 6672.28  287.76
   1   2   6 6491.04  310.79
  -1   2  -6 6759.82  302.40
   1  -2   6 6801.40  305.70
   1  -2   6 6742.69  342.77
   1  -2   6 7032.04  315.92
   1  -2   6 6595.87  316.31
  -1  -2  -6 6664.80  298.66
  -1  -2  -6 6216.82  271.02
  -1   2  -7 1599.87   83.09
   1   2   7 1652.92  109.10
   1   2   7 1752.95  121.21
   1   2   7 1654.41   96.88
  -1   2  -7 1628.11  100.73
   1   2   7 1524.62   74.56
   1   2   7 1700.60  127.74
   1  -2   7 1900.04   98.82
   1  -2   7 1821.86   90.00
   1  -2   7 2019.56  131.30
   1  -2   7 1857.72   92.48
  -1  -2  -7 1981.80   94.32
   1  -2   7 1927.97   92.10
  -1  -2  -7 1861.12   84.37
  -1   2  -8 3124.66  163.26
   1   2   8 2975.93  171.22
  -1   2  -8 2933.02  141.24
   1   2   8 2955.53  155.84
   1  -2   8 3155.62  173.77
   1  -2   8 3487.98  162.66
   1  -2   8 3467.45  166.94
  -1  -2  -8 3428.00  157.83
   1  -2   8 3397.85  163.29
  -1   2  -9 4738.26  225.05
   1   2   9 4923.73  265.78
   1   2   9 4647.88  240.31
  -1   2  -9 4897.01  247.07
   1  -2   9 4672.76  228.23
  -1  -2  -9 5001.18  266.42
   1  -2   9 5021.35  245.68
  -1   2 -10  984.96   65.51
   1   2  10  976.38  136.83
   1   2  10 1050.98   81.06
  -1   2 -10 1010.28   98.84
   1  -2  10  829.80   60.81
  -1  -2 -10  842.17   60.75
   1  -2  10  839.40   66.32
   1   2  11  281.80   84.74
   1   2  11  232.02   63.74
  -1   2 -11  251.15   64.97
   1  -2  11  333.29   43.57
  -1  -2 -11  350.06   41.38
   1  -2  11  341.11   39.79
   1   2  12   58.17   38.26
   1   2  12   89.00   48.54
  -1   2 -12   87.43   30.60
   1  -2  12  132.29   31.25
  -1  -2 -12   84.73   46.98
   1  -2  12  115.69   44.97
   1   2  13 1235.19  102.33
   1   2  13 1193.03   89.84
  -1   2 -13 1224.97   77.67
   1  -2  13 1264.70   80.27
   1  -2  13 1187.37   74.64
  -1  -2 -13 1208.28   74.82
   1   2  14 2237.54  188.82
   1   2  14 2110.82  169.63
  -1   2 -14 2012.78  114.10
   1  -2  14 2354.99  119.17
   1  -2  14 2201.47  112.63
  -1  -2 -14 2499.52  119.87
  -1   3  15 1357.96   81.69
   1   3 -15 1427.62   75.74
  -1   3  15 1474.98   99.71
   1  -3 -15  979.42   55.91
  -1  -3  15 1192.75   61.64
  -1   3  14  332.50   43.18
   1   3 -14  323.31   62.93
  -1   3  14  333.54   60.47
   1  -3 -14  347.01   29.10
  -1  -3  14  342.77   52.59
   1   3 -13   49.27   25.89
  -1   3  13   65.37   43.58
  -1   3  13   49.79   50.90
   1  -3 -13   53.41   18.00
  -1  -3  13   75.60   19.51
  -1  -3  13   75.13   21.76
   1   3 -12 2318.76  123.96
  -1   3  12 2395.38  207.46
  -1   3  12 2365.02  132.18
   1  -3 -12 2365.63  129.83
  -1  -3  12 2399.89  128.97
  -1  -3  12 2253.52  121.93
   1   3 -11   57.44   31.41
  -1   3  11   17.30   24.19
   1   3 -11   23.69   22.65
  -1   3  11   33.55   36.98
   1  -3 -11   21.19   15.39
  -1  -3  11   14.49   19.44
   1   3 -10 2498.62  154.73
  -1   3  10 2414.55  111.14
   1   3 -10 2639.38  131.31
  -1   3  10 2617.12  162.75
  -1   3  10 2624.66  134.70
   1  -3 -10 2303.18  109.35
  -1  -3  10 2235.86  117.87
   1   3  -9 3376.60  193.75
  -1   3   9 3136.04  159.39
   1   3  -9 3364.45  158.12
  -1   3   9 3283.44  186.21
  -1   3   9 3286.75  159.93
   1  -3  -9 3224.55  162.44
  -1  -3   9 2812.28  138.31
   1   3  -8 1229.94   96.56
  -1   3   8 1224.97   90.54
   1   3  -8 1193.39   66.52
  -1   3   8 1118.08   66.26
   1   3  -8 1205.24   61.74
  -1   3   8 1189.75   93.69
  -1   3   8 1215.26   61.13
   1  -3  -8 1127.10   56.07
  -1  -3   8 1124.89   79.47
   1  -3  -8 1130.18   73.55
  -1   3   7  442.24   37.96
   1   3  -7  438.68   95.03
   1   3  -7  450.06   33.54
   1   3  -7  464.37   39.81
  -1   3   7  435.88   34.93
  -1   3   7  480.51   55.73
  -1   3   7  456.86   61.61
  -1  -3   7  531.48   39.10
   1  -3  -7  600.69   34.34
  -1  -3   7  590.03   41.79
   1  -3  -7  577.19   37.59
  -1  -3   7  606.67   88.97
  -1  -3   7  627.20   53.03
   1  -3  -7  576.52   55.60
  -1   3   6 8288.19  377.01
   1   3  -6 7980.64  402.51
   1   3  -6 9157.56  424.15
   1   3  -6 8887.98  395.86
  -1   3   6 9369.63  439.29
  -1   3   6 9165.16  409.28
  -1   3   6 8815.04  431.87
  -1  -3   6 6896.12  302.10
   1  -3  -6 7692.69  360.65
  -1  -3   6 7211.06  357.24
   1  -3  -6 7580.77  347.17
  -1  -3   6 7134.34  358.60
  -1  -3   6 7228.99  330.95
   1  -3  -6 7025.34  400.44
  -1   3   5 7768.23  348.49
   1   3  -5 8099.79  408.15
   1   3  -5 7701.77  348.70
   1   3  -5 8074.47  335.77
   1   3  -5 7912.26  329.15
   1   3  -5 7693.45  341.22
  -1   3   5 7623.27  382.60
  -1   3   5 7827.12  354.99
   1  -3  -5 8303.11  360.35
   1  -3  -5 7920.49  361.57
  -1  -3   5 7930.75  335.79
  -1  -3   5 7716.73  381.30
  -1  -3   5 8163.94  363.07
   1  -3  -5 7779.94  380.53
  -1  -3   5 7971.93  353.04
  -1   3   429725.55 1601.32
   1   3  -431261.72 1748.14
  -1   3   430616.85 1701.59
   1   3  -430118.41 1612.98
   1   3  -430877.60 1627.55
  -1   3   430500.95 1624.52
   1   3  -431312.70 1663.28
  -1  -3   428011.83 1487.58
   1  -3  -429584.63 1601.02
  -1  -3   428392.80 1497.84
  -1  -3   429657.96 1649.84
  -1  -3   430245.38 1612.67
  -1  -3   428955.13 1526.04
   1  -3  -430052.30 1656.47
   1  -3  -431114.27 1651.49
  -1  -3   429508.62 1581.51
  -1   3   3 2867.40  116.45
   1   3  -3 2820.62  114.03
   1   3  -3 2716.40  152.12
   1   3  -3 2803.02  155.63
  -1   3   3 2915.90  124.69
  -1   3   3 2811.28  109.78
   1   3  -3 3049.60  118.33
  -1   3   3 2765.03  199.70
  -1   3   3 2727.17  124.05
  -1   3   3 3024.44  102.89
   1  -3  -3 2739.80   95.18
  -1  -3   3 2698.84   93.22
  -1  -3   3 2811.57  122.95
   1  -3  -3 2678.07  143.00
  -1  -3   3 2746.28  107.13
  -1  -3   3 2744.87  106.37
  -1  -3   3 2633.07  142.26
  -1  -3   3 2887.69  131.58
   1  -3  -3 2751.01  129.19
  -1   3   2 2570.53  104.79
   1   3  -2 2589.09   90.77
  -1   3   2 2466.98  112.64
   1   3  -2 2392.37  134.26
  -1   3   2 2449.78  133.65
   1   3  -2 2441.58  112.01
   1   3  -2 2507.17  132.50
  -1   3   2 2644.75   92.16
   1   3  -2 2101.35   98.85
  -1   3   2 2565.05   91.15
  -1   3   2 2424.41  107.82
   1  -3  -2 2683.39  118.42
  -1  -3   2 2807.95  101.47
   1  -3  -2 2711.92  134.17
  -1  -3   2 2789.09  126.65
   1  -3  -2 2760.52   98.99
   1  -3  -2 2675.97   99.03
  -1  -3   2 2829.08  121.34
  -1  -3   2 2741.27  145.42
  -1   3   120936.74 1046.36
   1   3  -121093.82 1004.58
  -1   3   120342.82 1036.40
   1   3  -120507.38 1099.09
  -1   3   120434.23 1053.61
   1   3  -119830.98 1024.15
   1   3  -120629.72 1059.12
   1   3  -121390.68 1042.60
  -1   3   120035.60 1019.86
   1  -3  -119513.58  957.56
  -1  -3   119844.33  946.63
   1  -3  -119782.58  954.68
  -1  -3   120289.14 1003.57
   1  -3  -119861.03 1000.56
  -1  -3   120695.17 1024.33
   1  -3  -119891.23  972.06
  -1  -3   119998.83  981.93
  -1   3   0 2064.80  104.07
   1   3   0 1984.30   79.10
  -1   3   0 2109.29  108.03
   1   3   0 2087.97   98.80
  -1   3   0 2026.22  142.79
   1   3   0 2023.51   93.90
   1   3   0 2050.22   96.59
   1   3   0 2122.47   80.32
  -1   3   0 1913.37  126.93
   1  -3   0 1648.50   79.25
  -1  -3   0 1743.30   62.99
   1  -3   0 1791.91   79.00
  -1  -3   0 1740.54   84.72
   1  -3   0 1599.31  100.25
  -1  -3   0 1745.22   89.47
   1  -3   0 1672.64   96.45
  -1  -3   0 1820.80   87.19
   1   3   1  255.99   26.14
  -1   3  -1  269.04   29.47
  -1   3  -1  257.84   68.66
  -1   3  -1  287.65   36.09
   1   3   1  254.17   30.11
   1   3   1  249.35   32.71
   1   3   1  267.05   22.17
  -1   3  -1  252.46   22.51
   1  -3   1  139.21   29.89
  -1  -3  -1  141.55   30.14
   1  -3   1  149.34   14.19
   1  -3   1  163.83   15.10
  -1  -3  -1  141.82   26.30
  -1  -3  -1  156.88   12.50
   1  -3   1  151.50   21.22
   1   3   2 1161.94   96.60
  -1   3  -2 1115.66   82.85
  -1   3  -2 1249.96   59.28
   1   3   2 1252.72   82.57
   1   3   2 1141.73   92.84
  -1   3  -2 1262.29   52.41
   1   3   2 1123.33   96.89
   1   3   2 1226.27   58.55
  -1   3  -2 1237.01   74.09
   1  -3   2 1202.33   51.31
  -1  -3  -2 1129.93   78.24
   1  -3   2 1186.71   40.24
  -1  -3  -2 1164.24   39.66
  -1  -3  -2 1183.07   41.12
   1  -3   2 1069.33   52.85
   1  -3   2 1098.74   78.18
  -1  -3  -2 1166.12   62.80
  -1  -3  -2 1097.46   65.86
   1  -3   2 1214.19   54.37
   1   3   3 3781.77  213.64
   1   3   3 4164.27  205.12
  -1   3  -3 4185.24  145.96
   1   3   3 4173.28  181.82
   1   3   3 3952.94  174.63
  -1   3  -3 4048.10  190.46
   1   3   3 4155.07  181.26
  -1   3  -3 3942.01  166.25
  -1   3  -3 3840.73  200.57
   1  -3   3 3739.17  142.77
  -1  -3  -3 3652.37  167.64
   1  -3   3 3566.84  126.88
   1  -3   3 3677.17  152.64
   1  -3   3 3444.02  150.47
  -1  -3  -3 3670.36  168.37
   1  -3   3 3575.08  186.19
   1   3   4 1372.06   82.54
  -1   3  -4 1397.39   80.79
  -1   3  -4 1399.35   96.86
   1   3   4 1288.15   67.14
  -1   3  -4 1345.95   66.48
   1   3   4 1254.55   69.56
  -1  -3  -4 1113.77   71.02
   1  -3   4 1051.30   82.45
   1  -3   4 1157.26   81.78
  -1  -3  -4 1063.96   63.15
   1  -3   4 1094.27   60.24
  -1  -3  -4 1158.75   64.85
  -1   3  -5 8498.36  433.94
   1   3   5 9091.02  448.12
   1   3   5 9063.10  426.74
   1   3   5 9960.71  473.83
  -1   3  -5 9117.51  444.82
   1   3   5 8522.30  410.39
   1  -3   5 9771.20  451.18
   1  -3   5 9754.03  453.42
   1  -3   5 9403.33  464.23
   1  -3   5 9526.02  432.02
  -1  -3  -510080.95  459.34
  -1  -3  -5 9879.99  467.75
  -1  -3  -5 9384.66  432.61
   1   3   6 1074.73   79.51
  -1   3  -6 1126.14  132.44
   1   3   6 1132.36   55.50
   1   3   6 1108.71   91.52
   1   3   6 1170.96   69.89
  -1   3  -6 1072.55   84.58
   1  -3   6 1230.09   64.00
   1  -3   6 1182.98   62.88
   1  -3   6 1266.60   58.73
   1  -3   6 1225.81   82.85
  -1  -3  -6 1232.51   66.28
  -1  -3  -6 1247.59   59.52
   1   3   7 7182.14  378.96
   1   3   7 7707.29  427.87
   1   3   7 7420.77  359.29
  -1   3  -7 7879.75  389.53
  -1   3  -7 7618.68  389.27
   1   3   7 7615.75  368.16
   1  -3   7 7332.20  374.46
   1  -3   7 7442.88  346.41
  -1  -3  -7 7913.77  361.91
   1  -3   7 7227.80  336.93
  -1  -3  -7 7968.67  375.01
   1   3   8 1856.06  104.33
   1   3   8 2040.30  167.87
   1   3   8 1839.98   82.20
  -1   3  -8 2057.68  131.46
  -1   3  -8 2038.15  126.43
   1  -3   8 2109.16  105.47
  -1  -3  -8 2118.07  104.63
   1  -3   8 1952.09   92.81
  -1   3  -9 1925.76  105.42
   1   3   9 1847.99  182.42
   1   3   9 1935.72  113.73
  -1   3  -9 1996.61  125.22
   1  -3   9 1951.40   97.88
  -1  -3  -9 2104.67  137.15
   1  -3   9 2123.91  109.47
  -1   3 -1012563.68  627.07
   1   3  1011913.62  651.48
   1   3  1012329.41  681.39
  -1   3 -1012503.03  728.16
   1  -3  1010745.66  563.77
  -1  -3 -1012034.77  608.74
   1  -3  1011529.79  612.02
  -1   3 -11  360.92   44.39
   1   3  11  349.76   66.18
   1   3  11  350.46   49.94
  -1   3 -11  373.36   51.40
   1  -3  11  308.95   48.52
  -1  -3 -11  375.03   40.50
   1  -3  11  349.26   37.29
   1   3  12 1009.24   96.64
   1   3  12 1012.27   77.82
  -1   3 -12 1043.61   70.40
  -1   3 -12  922.75   71.78
  -1  -3 -12 1114.71   68.77
   1  -3  12  946.98   58.44
   1   3  13  450.26   99.06
   1   3  13  431.17   47.92
   1  -3  13  266.36   25.68
  -1  -3 -13  321.95   36.95
   1   3  14  871.14   84.32
   1   3  14  840.54  101.63
  -1   3 -14 1354.80  102.22
  -1  -3 -14  964.77   59.95
   1   4 -14  175.40   31.22
  -1   4  14  181.12   49.95
  -1   4  14  150.36   26.86
   1  -4 -14  171.04   16.91
  -1  -4  14  163.81   35.05
   1   4 -13   74.49   25.65
  -1   4  13   94.59   40.57
  -1   4  13   63.17   22.04
   1  -4 -13   27.48   14.11
  -1  -4  13   73.30   24.51
   1   4 -12  161.54   55.91
  -1   4  12  151.63   51.05
  -1   4  12  140.92   44.67
   1  -4 -12  118.85   31.38
  -1  -4  12  147.58   35.07
   1   4 -11 6514.52  367.74
  -1   4  11 5785.63  288.92
   1   4 -11 6343.34  353.25
  -1   4  11 6500.57  417.22
  -1   4  11 6401.59  318.08
   1  -4 -11 6324.32  302.55
   1   4 -1015340.06  858.58
  -1   4  1014214.01  779.02
   1   4 -1014254.76  744.65
  -1   4  1013639.14  837.03
  -1   4  1013984.70  736.82
   1  -4 -1015699.08  806.77
   1   4  -9  585.86   79.57
  -1   4   9  515.53   40.18
   1   4  -9  589.33   50.83
  -1   4   9  602.56  110.24
  -1   4   9  545.75   42.15
   1  -4  -9  592.10   36.98
   1   4  -8 3958.00  229.20
  -1   4   8 4034.34  263.78
   1   4  -8 3981.39  187.10
   1   4  -8 3813.58  167.64
  -1   4   8 3864.88  180.34
  -1   4   8 3892.57  178.89
   1  -4  -8 3897.01  170.80
  -1  -4   8 3636.89  158.02
   1   4  -7 1096.73  150.46
  -1   4   7 1035.03   53.38
   1   4  -7 1018.42   60.92
   1   4  -7 1055.17   47.78
  -1   4   7 1004.24  119.60
  -1   4   7 1053.72   59.93
  -1   4   7 1111.85   54.64
   1  -4  -7  889.28   60.65
  -1   4   6 8419.99  462.05
   1   4  -6 7667.89  450.34
   1   4  -6 8173.12  359.66
   1   4  -6 7984.00  396.45
  -1   4   6 8180.79  382.04
  -1   4   6 7834.76  357.71
  -1   4   6 8193.31  407.44
   1  -4  -6 8545.79  379.03
  -1  -4   6 8930.25  485.08
  -1  -4   6 8593.68  417.87
   1  -4  -6 8225.00  410.54
  -1  -4   6 7971.88  362.12
   1  -4  -6 8083.90  437.68
   1   4  -511281.69  523.79
   1   4  -510528.37  548.34
  -1   4   511290.46  533.93
   1   4  -511517.69  572.16
   1   4  -511232.08  501.11
  -1   4   511340.07  539.65
  -1   4   511491.01  537.62
  -1   4   511559.00  628.85
   1  -4  -512416.21  568.14
  -1  -4   512165.97  564.95
  -1  -4   511065.87  499.96
   1  -4  -511609.23  553.45
   1  -4  -511719.55  574.25
  -1  -4   511277.27  526.42
  -1  -4   512367.49  614.37
  -1   4   4 6760.28  293.77
   1   4  -4 6428.28  326.03
   1   4  -4 6778.76  302.30
  -1   4   4 6792.95  330.18
   1   4  -4 6869.75  286.47
   1   4  -4 6472.18  267.50
  -1   4   4 6745.44  304.49
  -1   4   4 7046.52  302.65
  -1   4   4 6769.60  289.10
   1  -4  -4 6669.92  305.09
  -1  -4   4 6459.98  278.71
  -1  -4   4 6667.11  322.68
  -1  -4   4 6370.71  266.43
   1  -4  -4 6898.10  323.89
  -1   4   312177.60  532.90
   1   4  -312307.02  616.88
   1   4  -312102.01  565.98
  -1   4   312085.33  532.88
   1   4  -311800.54  540.73
   1   4  -312546.54  560.35
  -1   4   312093.37  569.67
  -1   4   312151.12  559.09
  -1   4   311821.44  586.91
   1  -4  -311630.61  556.14
  -1  -4   311452.49  495.98
  -1  -4   312217.66  560.90
  -1  -4   311166.51  472.66
   1  -4  -312086.67  632.14
  -1  -4   312275.64  550.19
  -1  -4   311920.80  555.04
  -1   4   2 3354.99  141.66
   1   4  -2 3418.94  132.77
  -1   4   2 3269.27  148.99
   1   4  -2 3287.25  210.05
   1   4  -2 3324.78  182.16
   1   4  -2 3303.27  142.93
  -1   4   2 3232.58  199.22
   1   4  -2 3438.16  127.47
  -1   4   2 3229.60  141.02
   1  -4  -2 3867.09  191.93
  -1  -4   2 3848.18  166.71
  -1  -4   2 3940.63  142.91
  -1  -4   2 4082.00  174.22
   1  -4  -2 3918.20  175.98
  -1  -4   2 4079.64  185.18
   1  -4  -2 4026.05  151.39
  -1  -4   2 4174.23  157.28
  -1   4   1  404.42   30.56
   1   4  -1  423.00   20.93
   1   4  -1  422.06   18.16
   1   4  -1  442.24   75.02
  -1   4   1  408.50   42.87
   1   4  -1  408.00   39.44
   1   4  -1  419.78   36.09
  -1   4   1  411.51   45.20
  -1   4   1  407.45   52.47
   1  -4  -1  432.88   49.50
  -1  -4   1  450.86   22.17
  -1  -4   1  421.51   28.25
   1  -4  -1  420.17   45.54
  -1  -4   1  454.84   38.32
   1  -4  -1  417.72   24.03
  -1  -4   1  437.76   33.65
   1  -4  -1  428.89   23.00
  -1  -4   1  414.43   22.53
  -1   4   0 5317.89  243.29
   1   4   0 5410.94  221.60
   1   4   0 5329.73  208.16
   1   4   0 5360.76  241.13
  -1   4   0 5273.81  275.78
   1   4   0 5291.13  268.34
   1   4   0 5464.81  243.79
  -1   4   0 5232.48  221.67
  -1   4   0 5284.49  244.23
   1  -4   0 5572.56  238.69
  -1  -4   0 5906.35  229.29
  -1  -4   0 5538.59  228.30
   1  -4   0 5661.47  234.12
  -1  -4   0 5674.45  246.23
   1  -4   0 5553.29  254.27
  -1  -4   0 5820.43  257.80
   1  -4   0 5632.85  239.36
   1   4   1 5922.04  238.21
   1   4   1 5681.78  244.21
  -1   4  -1 5551.23  258.09
  -1   4  -1 5787.95  294.33
   1   4   1 5809.97  260.04
  -1   4  -1 5754.23  273.87
   1   4   1 6083.23  246.06
   1  -4   1 5924.86  243.64
   1  -4   1 6002.62  291.69
   1  -4   1 6179.94  251.53
  -1  -4  -1 6187.47  246.97
  -1  -4  -1 6044.00  254.75
   1  -4   1 5317.93  245.82
  -1  -4  -1 5988.96  259.90
  -1  -4  -1 5813.10  251.64
   1   4   2  676.57   61.77
   1   4   2  702.59   45.10
  -1   4  -2  681.02   36.51
   1   4   2  703.11   51.38
   1   4   2  662.27   73.18
  -1   4  -2  675.63   61.28
  -1   4  -2  688.30   39.77
   1   4   2  695.30   34.94
  -1   4  -2  707.29   47.60
   1  -4   2  619.57   47.15
  -1  -4  -2  629.36   48.07
   1  -4   2  658.36   28.29
  -1  -4  -2  594.23   40.55
   1  -4   2  609.43   34.18
  -1  -4  -2  614.19   80.80
   1  -4   2  633.59   53.65
   1   4   3 5910.83  269.09
  -1   4  -3 5865.58  226.91
   1   4   3 6459.19  290.30
   1   4   3 5999.03  270.81
   1   4   3 6029.24  268.03
  -1   4  -3 5984.39  294.86
  -1   4  -3 6128.46  284.75
   1   4   3 5995.45  253.02
  -1   4  -3 5988.06  273.21
   1  -4   3 5613.96  275.87
   1  -4   3 5783.44  244.25
   1  -4   3 5363.96  213.48
  -1  -4  -3 5547.52  246.13
  -1  -4  -3 5547.62  258.50
   1  -4   3 5274.82  240.42
   1   4   4 1836.41   94.25
  -1   4  -4 1857.47  113.48
  -1   4  -4 1833.73   82.77
   1   4   4 1858.22   79.35
   1   4   4 1968.62  102.12
  -1   4  -4 1963.75   94.33
  -1  -4  -4 1433.94   77.12
   1  -4   4 1406.60   96.27
   1  -4   4 1432.26   88.15
  -1  -4  -4 1420.72   79.90
   1   4   5 2405.82  108.79
   1   4   5 2485.43  128.05
  -1   4  -5 2679.33  200.81
   1   4   5 2842.07  146.94
   1   4   5 2403.84  106.07
  -1   4  -5 2446.76  109.27
   1  -4   5 2218.06  101.06
   1  -4   5 2226.71  100.94
   1  -4   5 2183.45  127.08
  -1  -4  -5 2265.10  106.59
  -1  -4  -5 2178.86  109.74
  -1  -4  -5 2217.96  106.83
   1   4   6 4092.77  206.13
   1   4   6 4211.71  212.54
   1   4   6 4203.47  190.19
   1   4   6 4305.26  196.79
  -1   4  -6 4358.22  235.43
  -1   4  -6 4147.60  186.71
   1  -4   6 4371.02  193.49
  -1  -4  -6 4116.30  188.03
  -1  -4  -6 4435.59  223.86
  -1   4  -7  266.79   31.65
   1   4   7  287.09   46.05
   1   4   7  274.44   27.80
   1   4   7  239.16   29.33
  -1   4  -7  269.57   57.03
  -1  -4  -7  271.28   50.74
   1  -4   7  300.03   39.85
   1   4   816556.18  899.29
   1   4   816119.44  858.11
   1   4   816597.20  880.20
  -1   4  -816537.88  917.79
  -1   4  -817111.45  876.13
  -1  -4  -817390.13  889.14
   1   4   9 5681.21  304.28
   1   4   9 4696.43  229.14
   1   4   9 5399.04  267.22
  -1   4  -9 6040.35  377.34
  -1   4  -9 5726.19  276.29
  -1  -4  -9 5388.65  259.22
   1   4  10 1997.31  134.64
   1   4  10 2021.18  141.47
  -1   4 -10 2194.07  154.16
  -1   4 -10 1920.55  108.87
  -1  -4 -10 1913.08  134.60
   1   4  11  926.55   89.69
   1   4  11  903.25   65.35
  -1   4 -11  917.57   86.36
  -1   4 -11  841.15   66.14
  -1  -4 -11 1043.40   65.61
   1   4  12  449.90  109.83
   1   4  12  497.19   46.98
  -1   4 -12  445.26   59.72
  -1   4 -12  445.88   72.20
  -1  -4 -12  462.95   43.67
   1   4  13  888.40   82.71
  -1   4 -13  856.81   59.98
   1   4  13  824.57   82.93
  -1  -4 -13  793.84   53.89
   1  -4  13  734.53   49.22
   1   4  14 1545.21  104.27
   1   4  14 1415.55   76.84
  -1   4 -14 1534.95   80.82
  -1  -4 -14 1647.51   80.71
   1   5 -14  883.84   82.10
  -1   5  14  945.87  121.99
  -1  -5  14  636.02   65.16
   1   5 -13  818.90   58.34
  -1   5  13  807.37   79.75
  -1   5  13  644.00   40.65
  -1  -5  13  750.48   61.19
   1   5 -12 1245.69   78.00
  -1   5  12 1247.44  104.13
   1  -5 -12 1060.14   66.34
  -1  -5  12 1450.19   95.80
   1   5 -11   99.47   29.24
  -1   5  11   91.73   43.69
  -1   5  11   77.98   17.91
   1  -5 -11   76.05   15.78
  -1  -5  11  -17.01   36.96
   1   5 -10  784.21   95.11
  -1   5  10  789.39   70.82
   1   5 -10  848.79   61.81
  -1   5  10  847.48   84.57
   1  -5 -10  614.05   54.83
   1   5  -9 1909.03  147.16
  -1   5   9 1776.13   95.97
   1   5  -9 1907.09  103.70
  -1   5   9 1865.39  127.14
   1  -5  -9 1675.25   82.34
   1   5  -8 1757.77  141.57
  -1   5   8 1587.42   91.27
   1   5  -8 1723.59   95.24
  -1   5   8 1773.49  119.36
   1  -5  -8 2077.92   92.27
   1   5  -7 1072.62  102.44
  -1   5   7 1026.59   64.45
   1   5  -7 1033.56   64.44
  -1   5   7 1070.33   84.38
   1  -5  -7 1060.09   67.66
   1   5  -6   47.69   77.58
  -1   5   6  104.19   42.84
   1   5  -6   47.59   24.14
  -1   5   6   44.98   32.91
   1  -5  -6  118.34   15.35
  -1   5   5  542.20   42.88
   1   5  -5  556.44  108.43
   1   5  -5  493.04   40.10
  -1   5   5  542.78   50.81
   1  -5  -5  474.84   28.78
  -1  -5   5  469.22   71.89
   1  -5  -5  484.65   45.56
   1   5  -4  221.58   72.57
   1   5  -4  156.91   26.08
   1   5  -4  170.82   19.83
  -1   5   4  179.35   31.77
  -1   5   4  170.99   27.39
  -1   5   4  178.17   18.73
   1  -5  -4  126.58   27.61
   1  -5  -4  125.93   30.06
  -1  -5   4   95.56   38.23
  -1  -5   4  110.07   17.95
  -1  -5   4  117.87   40.11
  -1   5   3 1163.49   93.91
   1   5  -3 1273.33  120.04
  -1   5   3 1203.16   53.17
   1   5  -3 1217.51   87.16
  -1   5   3 1198.40   62.66
   1   5  -3 1221.62   63.79
   1  -5  -3  924.72   56.84
  -1  -5   3  958.11   55.05
   1  -5  -3  901.61   41.95
  -1  -5   3  961.08   44.78
   1  -5  -3  923.29   59.82
   1   5  -2 2679.85  123.24
   1   5  -2 2809.45  176.46
  -1   5   2 2582.57  126.17
  -1   5   2 2660.71  120.16
  -1   5   2 2652.14  112.05
   1  -5  -2 2725.50  107.85
   1  -5  -2 2754.52  121.92
   1  -5  -2 2673.67  121.03
  -1  -5   2 2768.86  131.88
  -1  -5   2 2777.18  122.68
  -1   5   1 7508.38  331.34
  -1   5   1 7357.18  363.20
   1   5  -1 7701.80  360.73
  -1   5   1 7531.14  332.93
   1   5  -1 7435.25  334.55
  -1   5   1 7502.95  326.05
   1   5  -1 7548.53  356.58
   1  -5  -1 6972.78  303.77
  -1  -5   1 6825.63  310.56
   1  -5  -1 7459.71  318.02
  -1  -5   1 7270.26  349.27
   1  -5  -1 7252.82  322.73
  -1  -5   1 7606.78  340.50
   1  -5  -1 7265.33  323.39
  -1   5   0 1298.48   66.67
   1   5   0 1247.05   65.62
   1   5   0 1231.36   60.99
  -1   5   0 1247.80   56.12
  -1   5   0 1264.24   57.33
  -1   5   0 1329.44   85.90
   1  -5   0 1200.65   49.56
   1  -5   0 1185.60   53.02
   1  -5   0 1169.97   51.11
  -1  -5   0 1177.03   60.64
  -1  -5   0 1132.65   48.99
  -1  -5   0 1231.02   65.08
   1  -5   0 1229.57   64.64
  -1   5  -1 1543.95   94.55
   1   5   1 1494.78   63.68
  -1   5  -1 1503.29   62.92
  -1   5  -1 1514.09   69.16
   1   5   1 1519.06   78.06
  -1   5  -1 1471.49  105.31
   1  -5   1 1703.10   90.22
   1  -5   1 1729.80   71.77
  -1  -5  -1 1621.20   78.13
   1  -5   1 1784.83   70.60
  -1  -5  -1 1762.92   89.79
  -1  -5  -1 1706.22   68.93
   1   5   2  418.10   39.53
   1   5   2  388.56   27.42
  -1   5  -2  415.56   30.47
  -1   5  -2  426.82   73.00
   1   5   2  382.90   54.87
  -1   5  -2  406.38   20.12
  -1   5  -2  407.04   42.60
   1  -5   2  416.37   20.14
   1  -5   2  419.96   53.83
   1  -5   2  414.21   36.18
  -1  -5  -2  412.85   23.64
  -1  -5  -2  457.23   44.30
   1  -5   2  400.07   23.69
   1   5   3  204.99   23.42
  -1   5  -3  213.61   22.18
  -1   5  -3  194.57   21.79
   1   5   3  213.37   27.29
  -1   5  -3  222.15   66.56
  -1  -5  -3  126.45   18.50
   1  -5   3  129.28   18.41
   1  -5   3  125.05   53.35
   1   5   4 2486.49  140.22
  -1   5  -4 2606.20  145.83
   1   5   4 2608.18  118.46
  -1   5  -4 2430.19  106.53
   1  -5   4 2100.16  162.65
  -1  -5  -4 2069.94   97.61
   1  -5   4 2135.09   94.70
   1   5   5  209.98   49.96
   1   5   5  239.61   31.37
   1   5   5  221.24   18.58
   1   5   5  209.47   19.67
  -1   5  -5  230.21   27.52
  -1   5  -5  253.40   52.65
  -1  -5  -5  395.62   32.41
  -1  -5  -5  358.68   30.34
   1   5   6 1354.36  110.38
   1   5   6 1425.78   79.00
   1   5   6 1262.63   59.96
  -1   5  -6 1352.32  107.15
  -1   5  -6 1368.89   72.05
  -1  -5  -6 1460.03   76.68
   1   5   7 2143.20  156.38
   1   5   7 2196.94  109.29
   1   5   7 2090.36   98.36
  -1   5  -7 2168.24  150.08
  -1   5  -7 2086.10  131.64
  -1  -5  -7 2354.27  144.72
   1   5   8 1664.08  144.20
   1   5   8 1579.77   84.17
   1   5   8 1672.94   83.72
  -1   5  -8 1641.85  129.09
  -1   5  -8 1616.48  117.57
  -1  -5  -8 1834.58   95.95
   1   5   9 1279.18  132.73
   1   5   9 1188.24   66.24
   1   5   9 1233.71   87.43
  -1   5  -9 1354.32  181.44
  -1   5  -9 1269.71   77.30
  -1  -5  -9 1470.62   82.08
   1   5  10  251.69   83.95
   1   5  10  224.70   28.22
  -1   5 -10  251.73   64.35
  -1   5 -10  253.89   36.01
  -1  -5 -10  307.42   56.59
   1   5  11 2694.65  161.12
   1   5  11 2588.84  126.95
  -1   5 -11 2634.10  174.98
  -1   5 -11 2696.74  134.71
  -1  -5 -11 2515.36  127.54
   1   5  12   -7.22   25.49
  -1   5 -12   10.44   16.94
   1   5  12   20.00   20.52
  -1  -5 -12    6.48   13.96
   1  -5  12   -3.72   19.85
   1   5  13  918.74   76.15
  -1   5 -13  910.70   57.85
   1   5  13  773.25   45.15
  -1  -5 -13  802.89   50.76
   1  -5  13  947.18   57.79
   1   6 -13  829.81   59.52
  -1   6  13  857.59   77.63
  -1  -6  13 1007.27   73.36
   1   6 -12 1063.85  101.06
  -1   6  12 1097.21  133.22
  -1  -6  12 1220.56   89.95
   1   6 -11 2611.87  134.43
  -1   6  11 2560.19  204.74
  -1   6  11 2441.53  124.39
  -1  -6  11 2382.06  150.56
   1   6 -10 1146.66  115.12
  -1   6  10 1128.70   90.40
   1   6 -10 1106.97   72.95
  -1   6  10 1068.54   88.89
   1  -6 -10  986.73   51.43
   1   6  -9  525.69   95.97
  -1   6   9  513.05   48.13
   1   6  -9  548.38   50.97
  -1   6   9  551.15   64.74
   1  -6  -9  581.74   34.28
   1   6  -8  407.61   77.76
  -1   6   8  362.36   42.41
   1   6  -8  377.88   43.58
  -1   6   8  388.23   54.20
   1  -6  -8  354.92   26.38
   1   6  -7 1651.40  135.26
  -1   6   7 1662.85   95.44
   1   6  -7 1622.51   91.25
  -1   6   7 1595.90  104.77
   1  -6  -7 1656.81   90.10
   1   6  -6 1241.57  108.45
  -1   6   6 1253.25  106.36
   1   6  -6 1192.94  101.60
  -1   6   6 1250.96  113.95
   1  -6  -6 1339.60   62.17
   1   6  -5  817.66   84.71
  -1   6   5  877.97   89.14
   1   6  -5  821.13   83.09
  -1   6   5  807.04   87.38
   1  -6  -5 1018.37   48.76
   1   6  -4 1713.80  110.23
   1   6  -4 1723.68   89.14
  -1   6   4 1680.15   93.16
  -1   6   4 1720.60   77.35
  -1   6   4 1612.43   87.29
   1   6  -3 2315.32   98.39
   1   6  -3 2341.09  129.98
   1   6  -3 2411.32  115.45
  -1   6   3 2393.68  119.90
  -1   6   3 2379.94  102.93
  -1   6   3 2318.85  112.43
   1  -6  -3 2568.19  116.51
  -1  -6   3 2439.34  104.56
   1   6  -2 6285.56  279.02
   1   6  -2 6491.11  314.55
   1   6  -2 6286.32  286.73
  -1   6   2 6426.13  318.17
  -1   6   2 6326.27  292.64
  -1   6   2 6480.49  292.72
   1  -6  -2 6229.37  281.43
  -1  -6   2 6091.96  276.71
  -1   6   1  717.54   39.20
   1   6  -1  691.10   44.47
  -1   6   1  730.06   44.40
   1   6  -1  733.84   72.70
   1   6  -1  747.88   43.32
  -1   6   1  716.72   42.28
   1  -6  -1  793.47   35.69
   1  -6  -1  778.03   49.25
  -1   6   0 3961.88  185.09
  -1   6   0 3988.51  169.63
  -1   6   0 3865.35  173.70
   1   6   0 4002.67  179.93
  -1   6   0 3830.21  183.46
   1  -6   0 3960.68  162.48
   1  -6   0 3755.86  158.23
   1  -6   0 3638.96  157.89
  -1   6  -110293.22  508.59
  -1   6  -110447.15  486.26
   1   6   110600.18  498.90
  -1   6  -110413.98  480.51
   1  -6   110105.05  488.34
   1  -6   110895.98  507.16
  -1   6  -2 4058.64  199.07
   1   6   2 3774.87  197.49
   1   6   2 4050.01  187.81
  -1   6  -2 4124.99  178.16
   1  -6   2 3689.56  172.56
   1   6   3 2297.45  109.67
  -1   6  -3 2367.39  131.23
  -1   6  -3 2287.62  104.05
   1   6   4 1572.30   88.60
  -1   6  -4 1633.24  109.97
  -1   6  -4 1577.63   96.08
   1   6   5 2120.54  108.37
   1   6   5 2259.45  117.61
  -1   6  -5 2159.77  141.22
  -1   6  -5 2108.47  100.24
  -1  -6  -5 1990.68  101.34
   1   6   6 1936.09  108.78
   1   6   6 1910.10  103.48
  -1   6  -6 1972.35  138.60
  -1   6  -6 1852.86   93.75
  -1  -6  -6 2042.73  102.57
   1   6   7 2517.61  138.78
   1   6   7 2332.17  151.33
  -1   6  -7 2366.42  162.35
  -1   6  -7 2284.43  114.00
  -1  -6  -7 2703.20  158.34
   1   6   8 5691.62  297.20
   1   6   8 5314.93  261.16
  -1   6  -8 6057.18  429.83
  -1   6  -8 5551.53  263.24
  -1  -6  -8 5537.46  268.33
   1   6   9  401.80   47.81
   1   6   9  384.56   33.95
  -1   6  -9  422.16   82.20
  -1   6  -9  396.39   40.25
  -1  -6  -9  324.67   37.00
   1   6  10   71.91   32.11
   1   6  10   83.95   26.29
  -1   6 -10  101.35   54.00
  -1   6 -10   67.72   25.99
  -1  -6 -10   96.19   37.47
   1   6  11 1353.85   90.85
  -1   6 -11 1369.22  115.67
  -1   6 -11 1346.87   76.12
  -1  -6 -11 1413.75   76.96
   1   6  12  144.47   53.48
  -1   6 -12  126.96   43.68
   1  -6  12  111.65   35.36
  -1  -6 -12   77.77   29.39
   1   7 -12  502.40   46.10
  -1   7  12  478.73   51.22
  -1  -7  12  485.23   59.20
   1   7 -11  796.35   58.22
  -1   7  11  764.13   65.32
  -1   7  11  695.59   49.89
  -1  -7  11  822.66   75.40
   1   7 -10  312.88   41.54
  -1   7  10  304.54   46.75
  -1   7  10  320.26   40.66
  -1  -7  10  367.33   58.05
   1   7  -9  343.29   41.03
  -1   7   9  341.71   44.82
  -1   7   9  334.56   63.18
  -1  -7   9   -7.51   51.04
   1   7  -8 1850.61  147.15
   1   7  -8 1815.15  101.86
  -1   7   8 1835.66  111.03
  -1   7   8 1803.69  103.39
   1   7  -7  513.46   85.14
   1   7  -7  549.64   50.29
  -1   7   7  581.11   54.88
  -1   7   7  546.09   52.80
   1   7  -6   95.79   43.95
  -1   7   6   91.02   28.74
   1   7  -6   93.98   27.10
  -1   7   6   75.29   27.09
   1  -7  -6   57.96   13.51
   1   7  -5  635.30   69.74
  -1   7   5  636.84   82.24
   1   7  -5  644.81   51.38
  -1   7   5  659.22   50.01
   1  -7  -5  515.21   31.75
   1   7  -4  863.60   73.44
   1   7  -4  923.76   61.60
  -1   7   4  870.68   56.44
  -1   7   4  920.32   91.08
   1   7  -3    8.52   19.71
   1   7  -3   21.03   18.18
   1   7  -3    7.25   14.10
  -1   7   3   10.59   11.44
  -1   7   3   12.61   17.76
   1   7  -2 9857.19  503.41
   1   7  -2 9720.34  478.95
  -1   7   2 9520.53  449.37
  -1   7   2 9904.65  472.49
   1   7  -1  909.36   60.53
   1   7  -1  932.26   69.88
  -1   7   1  943.87   49.26
  -1   7   1  940.64   51.70
   1   7   0  836.36   57.01
   1   7   0  839.59   76.64
  -1   7   0  804.74   46.40
   1   7   1 7420.00  382.60
   1   7   1 9727.04  484.19
  -1   7  -1 7281.58  341.13
   1   7   2  103.49   27.22
   1   7   2  215.38   50.36
  -1   7  -2  123.67   43.63
  -1   7  -2   97.95   32.94
   1   7   3 4683.17  220.74
   1   7   3 4733.48  231.77
  -1   7  -3 4604.50  271.29
  -1   7  -3 4757.79  216.01
  -1   7  -4 2587.94  191.09
  -1   7  -4 2618.79  122.56
  -1   7  -5  825.49  122.25
  -1   7  -5  836.62   53.11
  -1  -7  -5  934.09   57.92
  -1   7  -6 4913.67  353.73
  -1   7  -6 4663.94  221.35
  -1  -7  -6 5143.73  240.54
   1   7   7 1715.49  126.96
  -1   7  -7 1792.24  149.86
  -1   7  -7 1678.59   88.98
  -1  -7  -7 1730.13  111.74
   1   7   8  668.98   68.80
   1   7   8  760.33   55.54
  -1   7  -8  749.93   98.97
  -1   7  -8  733.92   51.51
  -1  -7  -8  796.27   51.60
   1   7   9  300.88   53.90
   1   7   9  328.44   33.68
  -1   7  -9  362.11   74.26
  -1   7  -9  364.78   37.58
  -1  -7  -9  322.59   32.24
   1   7  10  424.64   40.38
   1   7  10  445.73   34.72
  -1   7 -10  476.27   80.59
  -1   7 -10  489.31   41.22
  -1  -7 -10  443.98   33.94
   1   7  11  277.75   30.52
  -1   7 -11  331.52   31.44
   1  -7  11  225.47   48.32
  -1  -7 -11  182.72   21.39
   1   8 -11  512.78   66.80
  -1   8  11  458.57   39.14
  -1  -8  11  472.91   57.15
   1   8 -10  604.15   50.49
  -1   8  10  580.51   66.50
  -1   8  10  581.37   50.53
  -1  -8  10  713.68   67.16
   1   8  -9 1429.92   82.20
  -1   8   9 1385.05  101.71
  -1   8   9 1311.19  116.97
  -1  -8   9 1330.11   97.67
   1   8  -8  567.39   49.71
  -1   8   8  556.62   65.07
  -1   8   8  562.71   51.35
  -1  -8   8  573.19   63.12
   1   8  -7  659.99   52.69
  -1   8   7  609.22   55.34
  -1  -8   7  647.59   62.80
   1   8  -6  188.87   30.95
  -1   8   6  193.32   33.49
  -1  -8   6   -2.97   32.00
   1   8  -5  325.64   61.26
  -1   8   5  301.63   40.87
  -1   8   4 1996.86  105.77
   1   8  -4 2031.53  133.17
  -1  -8   4 1848.73  100.55
   1  -8  -4 1793.19   80.99
   1   8  -3 1803.81   97.89
  -1   8   3 1721.08  119.40
   1   8  -2 1164.16   71.44
   1   8  -2 1102.35   56.07
  -1   8   2 1099.78   55.94
  -1   8   2 1142.91   85.52
   1   8  -1 1769.50   95.41
   1   8  -1 1992.76   94.75
  -1   8   1 1725.58   82.35
  -1   8   1 1785.95  109.38
   1   8   0    2.38   39.45
  -1   8   0   45.15   24.94
  -1   8   0   82.81   25.07
   1   8   1 3914.86  187.13
  -1   8  -1 3946.10  180.72
   1   8   2 5880.23  277.81
  -1   8  -2 5906.36  275.64
  -1   8  -3  822.99   63.92
  -1   8  -3  791.13   48.61
  -1   8  -4 1451.52  103.68
  -1   8  -4 1370.13   89.38
  -1  -8  -4 1466.65   77.89
  -1   8  -5  707.56   76.79
  -1   8  -5  687.09   45.14
  -1  -8  -5  793.56   50.22
   1   8   6  222.67   55.77
  -1   8  -6  109.23   47.60
  -1   8  -6   96.18   22.09
  -1  -8  -6  129.59   38.03
   1   8   7 2060.11  111.70
  -1   8  -7 2240.32  153.03
  -1   8  -7 2057.30  102.35
  -1  -8  -7 1977.85   98.12
   1   8   8 1085.30   67.92
  -1   8  -8 1128.61  105.99
  -1   8  -8 1086.05   62.38
  -1  -8  -8 1157.87   61.01
  -1   8  -9   24.54   16.12
   1   8   9   17.93   30.83
  -1  -8  -9   37.54   20.86
   1  -8   9  -26.05   29.63
   1   8  10  154.13   22.36
  -1   8 -10  184.87   38.24
   1  -8  10  258.03   44.90
   1   9  -9  196.33   29.40
  -1   9   9  177.41   36.88
  -1  -9   9  199.01   37.49
   1   9  -8  866.93   55.77
  -1   9   8  781.22   69.25
  -1  -9   8  940.53   69.61
   1   9  -7 1191.02   69.14
  -1   9   7 1131.78  112.85
  -1  -9   7 1102.14   72.29
   1   9  -6 1057.63   65.36
  -1   9   6  963.82   67.43
  -1  -9   6  980.60   64.63
   1   9  -5  728.42   52.60
  -1   9   5  669.90   53.95
   1   9  -4    8.57   16.09
  -1   9   4    2.98   16.90
   1   9  -3 1032.03   64.68
  -1   9   3  972.04   59.86
   1   9  -2 1758.00  117.63
  -1   9   2 1701.82   85.01
   1   9  -1 1426.24  100.76
   1   9  -1 1392.42   67.46
  -1   9   1 1333.70   65.92
   1   9   0  151.19   27.53
  -1   9   0  132.60   17.70
   1   9   1 2438.56  118.76
  -1   9  -1 2224.73  114.95
   1   9   2  178.46   30.56
  -1   9  -2   92.33   28.41
  -1   9  -3 1378.77   69.28
  -1  -9  -3 1533.68   77.04
  -1   9  -4 1087.08   57.68
  -1  -9  -4 1059.02   58.18
   1   9   5  249.60   37.78
  -1   9  -5  245.76   25.74
  -1  -9  -5  258.85   25.65
   1   9   6  448.21   46.90
  -1   9  -6  445.01   34.36
  -1  -9  -6  481.84   33.58
  -1   9  -7 1824.96   87.58
   1   9   7 1874.68   98.71
  -1  -9  -7 1683.86   78.30
   1  -9   7 1648.60  103.15
   1   9   8  877.47   88.70
  -1   9  -8  869.00   46.51
   1  -9   8  887.58   67.13
   1  10  -6  573.23   61.81
  -1  10   6  556.20   53.91
   1  10  -5 2670.59  148.83
  -1  10   5 2682.51  163.60
   1  10  -4  800.91   70.73
  -1  10   4  779.66   76.93
   1  10  -3   14.98   15.35
  -1  10   3    4.10   24.76
   1  10  -2 1135.95   64.10
  -1  10   2 1079.80   75.05
   1  10  -1  366.33   34.90
   1  10   0 3630.68  168.25
   1  10   0 3581.50  162.15
  -1 -10  -1 1784.62   85.73
   1  10   2   38.44   24.43
  -1 -10  -2   60.87   15.82
  -1  10  -3  544.43   38.46
  -1 -10  -3 1079.62   49.93
  -1  10  -4  271.76   20.19
  -1 -10  -5  308.72   21.14
   2   0 -16 1261.87   74.93
  -2   0  16 1456.39  132.27
   2   0 -15 2026.82   97.13
  -2   0  15 2590.20  131.09
  -2   0  15 2640.71  148.27
   2   0 -14  397.22   32.58
  -2   0  14  390.79   43.63
  -2   0  14  324.46   55.25
   2   0 -13  157.77   38.24
  -2   0  13  154.01   54.05
  -2   0  13  139.51   43.56
   2   0 -12   70.77   18.81
  -2   0  12   53.98   27.43
  -2   0  12   58.13   59.02
   2   0 -11 4169.38  192.13
  -2   0  11 4102.63  211.46
  -2   0  11 4426.57  268.56
   2   0 -10 7236.94  332.86
  -2   0  10 7099.72  353.25
  -2   0  10 6896.13  344.68
   2   0  -9  647.97   38.31
   2   0  -9  603.84   30.15
   2   0  -9  584.48   26.49
  -2   0   9  640.62   52.05
  -2   0   9  612.93   34.24
  -2   0   9  635.47   34.20
  -2   0   9  630.76   55.80
   2   0  -8   94.46   23.56
   2   0  -8   92.97   17.14
   2   0  -8   89.42   15.01
   2   0  -8  105.43   12.36
   2   0  -8  119.38   54.28
  -2   0   8   91.38   47.40
  -2   0   8   90.46   16.83
  -2   0   8   81.30   16.62
  -2   0   8   88.82   19.78
  -2   0   8   91.41   31.11
   2   0  -710431.24  492.97
   2   0  -710292.93  491.93
   2   0  -710260.78  474.11
   2   0  -710350.91  478.60
   2   0  -710859.99  521.50
  -2   0   7 9895.90  524.64
  -2   0   710141.29  473.28
  -2   0   710462.69  515.12
  -2   0   710149.18  466.25
  -2   0   710468.61  505.80
   2   0  -6 7611.70  346.52
   2   0  -6 7212.05  334.21
   2   0  -6 7684.21  328.69
   2   0  -6 7378.37  351.20
  -2   0   6 8016.00  416.71
  -2   0   6 7646.37  343.46
  -2   0   6 7644.98  348.95
  -2   0   6 7097.83  309.81
  -2   0   6 7564.85  357.11
   2   0  -5   35.21   22.91
   2   0  -5   59.73   24.00
   2   0  -5    4.52   18.49
   2   0  -5   64.81   28.83
   2   0  -5   37.68   46.71
  -2   0   5   22.41   26.46
  -2   0   5   44.99   21.66
  -2   0   5   40.12   43.48
  -2   0   5   74.28   24.22
  -2   0   5   37.49   27.33
   2   0  -4  389.58   42.39
   2   0  -4  416.28   40.43
   2   0  -4  456.20   35.03
   2   0  -4  433.73   47.55
  -2   0   4  414.26   46.65
  -2   0   4  416.69   45.35
  -2   0   4  365.56   50.09
  -2   0   4  407.54   25.12
  -2   0   4  429.50   49.23
   2   0  -3    0.31   19.81
   2   0  -3    9.75    8.40
   2   0  -3    8.83   18.72
   2   0  -3   -1.71   16.16
   2   0  -3  -11.58   38.99
  -2   0   3    3.89   36.86
  -2   0   3    4.70   21.99
  -2   0   3   -9.01   29.74
  -2   0   3    1.84    8.70
  -2   0   3    2.45   22.45
   2   0  -235544.40 1988.86
   2   0  -238664.16 2176.68
   2   0  -236423.93 1959.45
   2   0  -238658.06 2147.30
   2   0  -239775.20 2192.43
   2   0  -236679.62 2123.11
  -2   0   237308.25 2150.81
  -2   0   235113.04 1991.34
  -2   0   239696.69 2106.71
  -2   0   242071.29 2414.76
   2   0  -1 8705.01  455.09
   2   0  -1 8645.12  478.03
   2   0  -1 8826.82  350.86
   2   0  -1 9012.96  403.07
   2   0  -1 9200.77  399.79
   2   0  -1 9566.88  489.80
  -2   0   1 9258.10  423.28
  -2   0   1 8399.56  404.07
  -2   0   1 8634.07  353.56
  -2   0   1 9185.70  474.71
   2   0   0 2308.95  134.15
   2   0   0 2324.49  132.27
   2   0   0 2389.35  107.17
   2   0   0 2496.01  132.11
  -2   0   0 2014.04  127.19
  -2   0   0 2327.63  132.69
  -2   0   0 2285.60   88.51
  -2   0   0 2294.24   89.08
  -2   0   0 2405.02  107.26
  -2   0   0 2375.67  128.17
   2   0   1 6772.55  441.11
   2   0   1 6681.48  324.40
   2   0   1 7176.75  300.77
   2   0   1 6993.16  411.03
  -2   0  -1 6909.14  363.85
  -2   0  -1 6854.46  331.44
  -2   0  -1 6889.71  295.64
  -2   0  -1 6505.27  283.82
  -2   0  -1 6950.66  289.47
  -2   0  -1 7064.78  343.92
   2   0   2 4633.71  247.51
   2   0   2 4403.54  207.80
   2   0   2 4615.71  177.54
  -2   0  -2 4553.27  251.41
  -2   0  -2 4672.74  217.96
  -2   0  -2 4439.60  189.40
  -2   0  -2 4831.19  206.37
  -2   0  -2 4614.04  192.67
   2   0   3  178.93   42.13
   2   0   3  146.68   51.89
   2   0   3  168.96   50.45
   2   0   3  178.87   37.72
  -2   0  -3  176.12   55.12
  -2   0  -3  172.93   24.85
  -2   0  -3  188.34   27.20
  -2   0  -3  175.27   11.33
   2   0   4 7477.95  361.32
   2   0   4 7194.14  373.30
   2   0   4 7709.46  375.81
   2   0   4 7485.73  301.43
   2   0   4 7681.17  407.66
  -2   0  -4 7682.38  348.12
  -2   0  -4 7561.71  334.18
  -2   0  -4 7452.50  334.54
  -2   0  -4 7506.77  299.11
   2   0   5 2895.15  197.71
   2   0   5 2739.92  165.26
   2   0   5 2845.94  148.05
   2   0   5 2974.82  148.38
  -2   0  -5 3009.53  159.42
  -2   0  -5 3025.57  162.07
  -2   0  -5 3032.69  138.17
  -2   0  -5 2902.87  103.51
   2   0   6 6437.63  314.44
   2   0   6 6229.01  322.66
   2   0   6 5976.06  283.73
   2   0   6 6315.78  302.39
  -2   0  -6 6148.06  280.75
  -2   0  -6 6538.75  289.37
  -2   0  -6 6037.90  277.55
   2   0   7  312.11   48.97
   2   0   7  357.64   57.92
   2   0   7  325.87   23.41
   2   0   7  360.35   71.43
  -2   0  -7  357.43   41.45
  -2   0  -7  342.47   34.10
  -2   0  -7  381.34   36.62
   2   0   8   81.44   37.41
   2   0   8   68.21   31.88
  -2   0  -8  121.57   25.51
   2   0   9 8052.64  482.68
   2   0   9 8240.82  417.88
  -2   0  -9 8299.55  400.29
   2   0  10  501.16   67.24
   2   0  10  505.14   57.51
  -2   0 -10  504.50   76.49
   2   0  11   67.86   40.20
   2   0  11   50.14   56.75
  -2   0 -11   54.35   26.62
   2   0  12   11.45   50.93
   2   0  12   24.55   25.81
  -2   0 -12    7.53   20.51
   2   0  13  438.49   60.80
   2   0  13  409.69   52.74
  -2   0 -13  439.56   43.62
   2   0  14  755.73   69.67
   2   0  14  629.22   90.21
  -2   0 -14  717.40   53.78
   2   1 -16   12.52   11.88
  -2   1  16   49.44   26.33
  -2   1  16   20.47   44.47
  -2  -1  16   18.69   23.38
  -2   1  15  125.69   35.15
   2   1 -15   54.65   31.61
  -2   1  15  141.07   29.21
   2  -1 -15   44.74   14.93
  -2  -1  15   72.45   54.19
  -2   1  14   48.78   30.36
   2   1 -14   26.70   17.20
  -2   1  14   38.71   27.53
   2  -1 -14   18.55   23.57
  -2  -1  14   25.67   28.73
   2   1 -13  538.22   41.17
  -2   1  13  554.31   87.49
  -2   1  13  496.39   60.68
   2  -1 -13  447.51   34.26
  -2  -1  13  431.79   57.33
   2   1 -12 2517.33  146.28
  -2   1  12 2438.46  147.53
  -2   1  12 2359.28  183.52
   2  -1 -12 2815.44  130.44
  -2  -1  12 2674.28  137.35
  -2  -1  12 2658.56  151.31
   2   1 -11  308.92   51.29
  -2   1  11  325.47   49.81
  -2   1  11  343.13   52.71
  -2  -1  11  390.32   36.86
   2  -1 -11  384.92   30.83
  -2  -1  11  394.65   80.74
  -2   1  10 1008.56   76.63
   2   1 -10  969.65   54.79
  -2   1  10  935.91   71.48
   2  -1 -10 1000.46   67.64
  -2  -1  10 1043.21   57.80
  -2  -1  10 1009.31   60.61
  -2  -1  10 1004.78  103.89
  -2   1   9 1423.82   87.75
   2   1  -9 1416.00   69.23
  -2   1   9 1465.22   94.44
   2  -1  -9 1419.42   79.97
   2  -1  -9 1495.46   85.34
  -2  -1   9 1454.80   98.86
  -2  -1   9 1445.92   75.32
  -2  -1   9 1449.33   73.27
  -2  -1   9 1485.15   78.51
   2  -1  -9 1453.69   73.03
  -2  -1   9 1340.79   84.06
  -2   1   8  192.01   17.82
   2   1  -8  139.96   32.26
   2   1  -8  166.68   53.21
   2   1  -8  151.32   20.57
   2   1  -8  143.32   12.75
  -2   1   8  152.92   31.65
   2   1  -8  137.02   15.75
  -2   1   8  136.16   35.89
   2  -1  -8   95.38   14.95
  -2  -1   8   72.18   34.46
   2  -1  -8   87.92   33.12
  -2  -1   8   74.92   23.48
  -2  -1   8  101.42   22.60
   2  -1  -8   95.57   30.59
   2  -1  -8   97.82   16.01
  -2  -1   8   95.18   30.87
  -2   1   7 9627.68  440.76
   2   1  -7 9712.32  481.89
  -2   1   7 9489.49  431.17
   2   1  -7 9059.29  411.90
   2   1  -7 9575.32  442.73
  -2   1   7 8899.51  407.50
   2   1  -7 9395.05  412.82
  -2   1   7 9640.42  475.08
   2   1  -7 9867.09  468.53
  -2   1   7 8944.47  431.96
  -2  -1   7 9164.31  451.71
   2  -1  -710282.43  527.88
  -2  -1   7 9571.82  488.12
   2  -1  -7 9395.85  449.00
  -2  -1   7 9224.14  448.81
   2  -1  -7 9260.00  415.03
  -2  -1   7 9123.89  439.77
   2  -1  -7 9741.89  437.49
   2   1  -6 2721.68  115.44
   2   1  -6 3095.58  130.88
   2   1  -6 2626.75  146.68
  -2   1   6 3076.49  128.00
   2   1  -6 2705.91  112.70
   2   1  -6 2759.32  129.27
  -2   1   6 2814.42  128.21
  -2   1   6 2642.64  109.28
   2   1  -6 3089.23  146.09
  -2   1   6 2779.07  134.77
  -2   1   6 2728.58  145.32
  -2  -1   6 2212.03  128.66
   2  -1  -6 2205.44  118.33
   2  -1  -6 2165.78  123.01
  -2  -1   6 2119.49  119.93
  -2  -1   6 2247.47  101.01
   2  -1  -6 2239.09   93.79
  -2  -1   6 2275.61  121.87
   2  -1  -6 2217.06  125.39
   2   1  -5 2289.56   97.21
  -2   1   5 2298.29  102.06
   2   1  -5 2403.78  143.72
  -2   1   5 2495.56  135.91
   2   1  -5 2424.91  100.82
   2   1  -5 2284.34  119.39
  -2   1   5 2344.03  117.11
   2   1  -5 2561.26  101.59
  -2   1   5 2410.44  134.61
   2   1  -5 2540.71  123.86
  -2   1   5 2620.09  124.47
  -2  -1   5 2353.49  127.64
   2  -1  -5 2299.50  103.14
  -2  -1   5 2002.45  117.71
   2  -1  -5 2492.36  120.62
  -2  -1   5 2263.07   96.06
   2  -1  -5 2322.04  105.21
   2  -1  -5 2324.22  124.92
  -2  -1   5 2357.71  158.60
   2   1  -4 8409.47  357.23
  -2   1   4 8756.85  397.73
   2   1  -4 9441.92  469.34
  -2   1   4 8575.39  415.92
   2   1  -4 8524.77  393.61
   2   1  -4 8453.13  407.33
  -2   1   4 8362.49  367.76
   2   1  -4 9195.77  395.62
  -2   1   4 8586.20  393.44
   2   1  -4 8073.88  376.26
  -2   1   4 8759.85  425.49
   2  -1  -4 8220.05  417.47
   2  -1  -4 8377.15  371.57
  -2  -1   4 8352.07  413.08
   2  -1  -4 8126.97  396.73
  -2  -1   4 8219.73  352.97
   2  -1  -4 8408.68  361.69
  -2  -1   4 8653.55  375.64
  -2  -1   4 8353.42  392.25
   2   1  -3 2122.07   84.29
   2   1  -3 2132.61  101.25
  -2   1   3 2661.12  156.52
  -2   1   3 2157.57  147.96
   2   1  -3 2192.98   92.79
   2   1  -3 2074.16  104.89
  -2   1   3 2136.90  138.30
  -2   1   3 2079.76  131.59
   2   1  -3 2320.15  118.54
   2  -1  -3 2483.27  116.11
   2  -1  -3 2281.00  131.55
  -2  -1   3 2367.88  117.40
   2  -1  -3 2371.70  109.72
  -2  -1   3 2298.04  141.42
  -2  -1   3 2253.15  117.61
   2  -1  -3 2260.96  106.27
   2  -1  -3 2394.64   92.39
  -2  -1   3 2446.57  125.57
   2   1  -2 8639.72  369.85
  -2   1   2 8478.35  395.87
  -2   1   2 8569.31  384.18
   2   1  -2 8430.35  394.76
   2   1  -2 8159.26  350.63
  -2   1   2 9518.63  467.88
   2   1  -2 8669.02  398.86
  -2   1   2 7936.78  401.07
   2  -1  -2 8264.41  439.74
   2  -1  -2 8769.20  336.79
   2  -1  -2 8204.55  404.36
   2  -1  -2 8191.79  366.64
  -2  -1   2 9291.56  446.27
   2  -1  -2 7772.25  402.04
  -2  -1   2 8824.13  455.80
  -2  -1   2 8133.61  378.45
  -2  -1   2 8471.29  389.63
  -2  -1   2 8067.87  353.78
   2  -1  -2 8333.59  323.68
  -2  -1   2 9091.08  425.49
  -2   1   122123.84 1083.66
   2   1  -119738.35  953.62
  -2   1   120041.86 1042.47
   2   1  -120799.34 1012.24
   2   1  -122062.19 1178.41
   2   1  -121935.81 1114.15
  -2   1   121016.16 1097.69
  -2   1   120620.50 1138.13
   2  -1  -122452.60 1095.14
   2  -1  -120924.71 1151.31
  -2  -1   118860.68 1016.42
  -2  -1   120794.68 1009.00
  -2  -1   119915.29 1073.96
   2  -1  -121193.09 1098.38
  -2  -1   120694.38 1061.58
  -2  -1   116800.96  878.63
   2   1   072668.20 4567.93
   2   1   065503.37 4202.95
   2   1   070522.03 4455.43
  -2   1   066907.91 4195.84
   2   1   061075.27 3828.55
  -2   1   071345.48 4386.59
   2   1   082242.41 5189.36
  -2   1   072430.35 4633.67
  -2   1   066547.18 4248.37
  -2   1   074142.53 4586.78
   2  -1   072431.46 4441.59
   2  -1   074054.10 4682.48
  -2  -1   070863.79 4471.13
  -2  -1   064349.39 4022.92
  -2  -1   072207.37 4534.19
   2  -1   066054.99 4236.03
   2  -1   069145.70 4403.87
  -2  -1   070929.27 4503.72
   2   1   155792.53 3361.93
  -2   1  -156779.30 3345.79
   2   1   153364.90 3266.20
   2   1   155660.52 3401.87
  -2   1  -156641.22 3490.65
   2   1   155741.95 3337.77
   2   1   156868.96 3395.68
  -2   1  -160784.15 3635.99
   2   1   156727.49 3533.27
  -2   1  -155559.28 3397.48
   2  -1   157263.15 3394.98
   2  -1   153249.87 3292.55
  -2  -1  -154498.89 3278.48
   2  -1   159664.29 3506.81
  -2  -1  -153341.12 3194.87
  -2  -1  -158554.52 3558.14
   2  -1   151835.49 3265.83
  -2  -1  -156804.93 3535.16
   2   1   216879.14  843.11
  -2   1  -216515.64  785.25
   2   1   217448.01  966.25
   2   1   216728.01  808.87
  -2   1  -216878.76  889.06
  -2   1  -217613.74  894.48
   2   1   216804.72  833.86
   2   1   218824.85  938.88
   2  -1   217775.65  842.63
   2  -1   218382.70  898.57
   2  -1   218995.65  951.81
  -2  -1  -218190.49  875.84
   2  -1   215359.58  692.03
  -2  -1  -217739.33  852.14
   2  -1   216966.87  886.64
  -2  -1  -219573.37  941.80
  -2  -1  -218863.30  901.40
  -2  -1  -218388.01  920.54
   2   1   3 4759.93  272.53
  -2   1  -3 4724.28  199.71
   2   1   3 5075.50  259.96
   2   1   3 4886.87  223.70
  -2   1  -3 4825.22  260.22
   2   1   3 5156.36  245.14
   2   1   3 4914.44  200.18
   2   1   3 4653.41  226.05
  -2   1  -3 5226.24  247.81
   2  -1   3 5532.74  242.31
   2  -1   3 5040.87  211.14
   2  -1   3 5215.38  244.57
  -2  -1  -3 5230.93  216.45
  -2  -1  -3 5455.03  231.44
   2  -1   3 5304.71  334.71
  -2  -1  -3 5182.88  259.90
  -2  -1  -3 5373.15  217.44
  -2   1  -4 1540.75   91.64
   2   1   4 1600.36  102.04
   2   1   4 1593.68   98.62
   2   1   4 1571.34  115.88
   2   1   4 1616.12   84.76
  -2   1  -4 1621.45   77.99
   2   1   4 1583.55   63.30
   2   1   4 1557.91   97.27
   2  -1   4 1907.81  108.39
   2  -1   4 1898.75  100.79
   2  -1   4 1861.62   92.66
  -2  -1  -4 1831.54   75.34
   2  -1   4 1941.39   87.23
  -2  -1  -4 1969.26  118.09
   2  -1   4 1727.41  117.52
  -2  -1  -4 1901.85  122.52
  -2  -1  -4 1992.58   76.41
  -2   1  -5  955.83   56.56
   2   1   5  978.62   79.95
   2   1   5 1063.26  144.52
   2   1   5  956.00   55.29
  -2   1  -5 1043.82  101.77
   2   1   5  985.34   47.75
   2   1   5 1019.72   75.53
   2   1   5  933.47  114.62
   2  -1   5 1419.12   69.68
   2  -1   5 1272.82   72.00
   2  -1   5 1284.61   72.17
  -2  -1  -5 1282.47   66.39
  -2  -1  -5 1287.88   68.22
   2  -1   5 1209.81   80.56
  -2  -1  -5 1279.85   96.67
  -2  -1  -5 1297.71   49.72
  -2   1  -6 5271.97  233.09
   2   1   6 5036.98  252.06
   2   1   6 5375.06  339.30
   2   1   6 4681.93  202.32
   2   1   6 5149.83  249.44
   2   1   6 5165.43  296.63
  -2   1  -6 5284.25  247.26
   2  -1   6 5204.92  238.94
   2  -1   6 5116.71  229.76
   2  -1   6 5428.77  295.89
  -2  -1  -6 4490.32  201.47
  -2  -1  -6 5412.66  239.56
   2  -1   6 5371.49  278.96
  -2  -1  -6 5326.73  267.54
   2   1   7 2925.90  161.20
  -2   1  -7 2756.75  158.23
   2   1   7 2498.16  212.49
  -2   1  -7 2868.75  133.00
   2   1   7 2753.79  147.71
   2   1   7 2828.88  153.32
   2  -1   7 3337.41  157.68
   2  -1   7 3150.94  161.32
  -2  -1  -7 3282.86  173.91
   2  -1   7 3079.43  140.33
  -2  -1  -7 2930.29  165.63
   2   1   8  403.33   96.05
  -2   1  -8  415.47   35.68
   2   1   8  427.79   78.67
  -2   1  -8  393.39   58.72
   2  -1   8  288.38   48.14
   2  -1   8  298.79   40.18
   2  -1   8  322.47   41.78
  -2  -1  -8  323.89   36.27
   2   1   9 1213.13   89.60
   2   1   9 1199.89   99.88
  -2   1  -9 1147.42   71.34
   2  -1   9 1199.19   87.86
  -2  -1  -9 1125.62   72.28
   2  -1   9 1153.29   77.36
   2   1  10   97.86   48.02
   2   1  10  255.21   42.88
  -2   1 -10   91.55   29.69
   2  -1  10  116.52   74.65
   2  -1  10  105.63   55.94
  -2  -1 -10  118.64   31.20
   2   1  11  811.67   87.05
   2   1  11  825.21  114.84
  -2   1 -11  772.40   59.31
   2  -1  11  884.91   82.31
   2  -1  11  911.47   69.56
  -2  -1 -11  836.15   92.77
   2   1  12 1037.59   86.10
   2   1  12 1111.04  146.14
  -2   1 -12 1072.69   70.12
   2  -1  12  943.98   72.35
   2  -1  12  999.51   86.48
  -2  -1 -12  920.88   67.26
   2   1  13 1272.40   98.24
   2   1  13 1177.22   87.37
   2  -1  13 1120.20  126.22
   2  -1  13 1031.00  103.76
  -2  -1 -13 1005.92   67.80
   2   1  14  514.45   60.02
   2   1  14  469.04   85.64
   2  -1  14  456.35   50.12
   2  -1  14  427.56   43.11
  -2  -1 -14  451.66   64.17
   2   2 -16 1309.59   63.60
  -2   2  16 1365.92  114.35
  -2   2  16 1311.12  118.41
  -2  -2  16 1204.46   72.11
   2   2 -15 2469.96  121.45
  -2   2  15 2536.37  147.94
  -2   2  15 2486.61  139.05
  -2  -2  15 2443.51  168.07
  -2   2  14 1021.64   76.57
   2   2 -14  649.66   67.59
  -2   2  14 1135.40   87.28
   2  -2 -14  867.15   56.97
  -2  -2  14  938.56   69.44
  -2   2  13  272.16   47.15
   2   2 -13  292.98   35.15
  -2   2  13  300.19   57.38
   2  -2 -13  329.17   26.91
  -2  -2  13  317.89   45.06
   2   2 -12  457.61   40.15
  -2   2  12  441.89   97.80
  -2   2  12  446.17   81.72
   2  -2 -12  359.56   29.70
  -2  -2  12  372.89   35.50
  -2  -2  12  374.93   48.34
   2   2 -11 1508.36   81.44
  -2   2  11 1388.58  107.06
  -2   2  11 1442.58   92.12
   2  -2 -11 1392.46   84.26
  -2  -2  11 1530.07   87.06
  -2  -2  11 1531.72   94.69
  -2   2  10 1788.47   82.80
   2   2 -10 2079.29   99.35
  -2   2  10 1923.43  122.03
  -2   2  10 1896.90  107.02
   2  -2 -10 1683.15   79.20
  -2  -2  10 1648.83   98.46
   2   2  -9 9735.11  509.27
  -2   2   9 9979.48  515.54
   2   2  -9 9903.34  468.45
  -2   2   9 9850.38  484.97
  -2   2   9 8968.08  433.91
   2  -2  -910627.93  495.72
   2  -2  -910367.89  486.94
  -2  -2   910947.69  532.01
   2   2  -8 2510.51  152.44
   2   2  -8 2680.06  154.21
  -2   2   8 2706.44  152.26
   2   2  -8 2688.68  144.31
  -2   2   8 2570.67  116.13
  -2   2   8 2797.88  135.73
   2  -2  -8 3084.91  148.56
  -2  -2   8 2740.76  129.59
   2  -2  -8 2939.18  120.58
  -2  -2   8 2894.14  143.67
  -2  -2   8 2765.19  150.86
   2  -2  -8 2883.86  140.15
   2  -2  -8 2996.36  150.80
  -2  -2   8 2951.20  171.99
  -2   2   719493.32 1024.47
   2   2  -721207.36 1137.48
   2   2  -719799.65 1020.05
   2   2  -720209.83 1016.64
   2   2  -719389.91  979.99
  -2   2   720524.87 1053.74
   2   2  -720038.68  997.90
  -2   2   720409.19 1087.35
   2  -2  -719847.17 1008.16
  -2  -2   719292.22  989.76
   2  -2  -719194.41  998.13
  -2  -2   718816.44  996.62
  -2  -2   719673.13  989.71
   2  -2  -719588.17 1083.45
   2  -2  -718641.21  955.87
  -2  -2   720300.18 1082.04
   2   2  -6 2534.74   99.79
   2   2  -6 2650.91  159.98
  -2   2   6 2526.85  116.05
   2   2  -6 2900.14  124.67
   2   2  -6 2866.91  132.57
  -2   2   6 2620.22   95.80
  -2   2   6 2673.34   98.56
  -2   2   6 2802.16  155.54
   2   2  -6 2852.98  134.82
  -2   2   6 2809.26  130.24
  -2  -2   6 2745.97  124.15
   2  -2  -6 2721.22  122.28
   2  -2  -6 2708.29  145.10
   2  -2  -6 2622.64  156.35
  -2  -2   6 2782.92  120.73
   2  -2  -6 2617.44  104.32
  -2  -2   6 2778.24  195.19
  -2  -2   6 2569.46  125.16
  -2   2   5 6366.30  262.21
   2   2  -5 6448.05  337.82
  -2   2   5 6161.20  277.09
   2   2  -5 6573.82  285.09
   2   2  -5 7027.35  321.79
  -2   2   5 6512.17  263.32
   2   2  -5 6469.85  272.46
  -2   2   5 6418.56  322.88
   2   2  -5 6955.50  312.61
  -2   2   5 6382.96  287.50
  -2  -2   5 6663.15  286.32
   2  -2  -5 6143.66  277.52
  -2  -2   5 7208.97  349.67
   2  -2  -5 6351.09  285.56
  -2  -2   5 6739.34  289.92
   2  -2  -5 6551.37  268.64
   2  -2  -5 6629.75  321.68
  -2  -2   5 7277.11  325.34
  -2   2   412426.59  570.40
   2   2  -413496.58  690.43
  -2   2   412254.68  574.64
   2   2  -413328.80  611.10
   2   2  -413344.56  617.59
  -2   2   413503.79  743.19
   2   2  -413564.33  636.37
  -2   2   413070.23  603.55
  -2   2   412977.37  601.52
   2  -2  -411821.73  559.10
  -2  -2   411997.98  525.45
   2  -2  -412771.01  634.43
  -2  -2   411290.16  576.06
   2  -2  -412116.07  564.50
  -2  -2   412767.74  585.86
   2  -2  -412326.22  555.15
  -2  -2   412528.96  573.42
  -2  -2   413707.40  644.53
  -2   2   3 1985.71  130.66
  -2   2   3 2028.51   99.02
   2   2  -3 2061.68  142.90
  -2   2   3 2258.26  116.35
   2   2  -3 2151.16   97.70
   2   2  -3 2230.81  105.53
  -2   2   3 2161.20   93.46
   2   2  -3 2167.10  104.14
   2  -2  -3 2476.75  190.67
   2  -2  -3 2683.49  119.65
   2  -2  -3 2672.13  126.79
  -2  -2   3 2695.95  206.98
  -2  -2   3 2510.95  104.99
  -2  -2   3 2616.60  112.26
   2  -2  -3 2481.07  114.29
   2  -2  -3 2697.30   90.04
  -2  -2   3 2939.81  160.91
  -2   2   211692.37  498.27
  -2   2   211698.27  538.61
   2   2  -212193.89  618.44
  -2   2   211599.29  654.60
   2   2  -212040.83  546.56
   2   2  -211742.61  551.90
  -2   2   211111.05  512.95
  -2   2   211534.78  537.32
   2   2  -211746.11  547.11
   2  -2  -211588.98  574.45
   2  -2  -212771.58  558.43
  -2  -2   212194.60  552.71
   2  -2  -212651.42  569.03
  -2  -2   212485.42  578.46
   2  -2  -212100.80  578.59
   2  -2  -212507.19  538.06
  -2  -2   212841.92  593.46
  -2   2   1 2269.15   80.09
  -2   2   1 2504.92  105.21
  -2   2   1 2392.08   87.82
   2   2  -1 2341.32  105.91
   2   2  -1 2312.42  159.22
  -2   2   1 2009.35  130.88
   2   2  -1 2288.27  147.35
  -2   2   1 2230.20  117.29
   2  -2  -1 2242.01  133.95
   2  -2  -1 2369.22   91.74
  -2  -2   1 2347.65  118.52
  -2  -2   1 2375.96  134.63
   2  -2  -1 2485.73   88.98
  -2  -2   1 2471.94  122.77
   2  -2  -1 2362.98  113.86
   2  -2  -1 2420.76   82.33
  -2  -2   1 2576.98  118.93
   2   2   0 7312.61  317.96
  -2   2   0 7595.24  315.73
   2   2   0 7758.33  347.53
  -2   2   0 7418.74  304.75
  -2   2   0 7357.15  363.82
   2   2   0 7672.07  332.85
   2   2   0 7404.45  332.69
   2   2   0 7587.76  383.38
  -2   2   0 7295.30  347.75
  -2   2   0 7358.53  306.83
   2  -2   0 7362.53  421.90
   2  -2   0 7111.13  296.61
   2  -2   0 7085.15  275.85
  -2  -2   0 6982.26  343.28
   2  -2   0 6887.08  280.72
  -2  -2   0 6689.86  294.71
   2  -2   0 6911.79  328.25
  -2  -2   0 7802.27  348.88
  -2  -2   0 7265.80  376.40
   2   2   1  939.83   53.30
  -2   2  -1  978.38   57.93
   2   2   1  854.35   57.63
   2   2   1  960.83   93.21
  -2   2  -1  979.62   46.18
   2   2   1 1031.49   87.67
  -2   2  -1  958.13  124.74
  -2   2  -1  942.99  133.57
   2   2   1 1049.23   67.41
   2  -2   1  961.47   74.66
   2  -2   1  997.87   42.22
   2  -2   1  972.90   41.76
  -2  -2  -1  987.63   67.04
   2  -2   1  959.81   46.41
   2  -2   1 1014.34   82.81
  -2  -2  -1  993.48   58.02
  -2  -2  -1 1003.51   62.78
   2  -2   1 1004.75   45.20
  -2  -2  -1 1057.55   66.74
   2   2   211943.58  566.90
   2   2   212057.08  591.60
   2   2   212088.94  628.23
   2   2   212186.04  569.36
  -2   2  -212985.74  639.72
   2   2   212706.86  589.37
  -2   2  -213266.00  660.82
  -2   2  -211763.62  530.08
   2  -2   212249.18  602.76
   2  -2   212510.51  520.44
   2  -2   213143.41  612.89
   2  -2   212272.89  547.16
  -2  -2  -212370.24  567.00
   2  -2   212230.86  515.12
  -2  -2  -212678.17  626.53
  -2  -2  -212698.91  592.84
  -2  -2  -212642.86  605.44
   2   2   3 1669.13   89.98
   2   2   3 1530.20   97.62
   2   2   3 1843.86   65.24
  -2   2  -3 1701.47   72.36
  -2   2  -3 1746.27  103.69
   2   2   3 1742.75   93.29
   2   2   3 1872.13   98.47
  -2   2  -3 1817.78  111.77
   2  -2   3 1389.03   91.64
  -2  -2  -3 1347.76   51.66
   2  -2   3 1301.29   59.08
  -2  -2  -3 1312.97   71.23
   2  -2   3 1342.37   62.89
  -2  -2  -3 1245.01   72.80
  -2  -2  -3 1327.67   67.69
   2   2   4 2267.40  120.98
   2   2   4 2158.58  132.03
   2   2   4 2232.01   78.88
  -2   2  -4 2156.74  168.00
   2   2   4 2331.67   98.90
   2   2   4 2342.82  122.82
   2   2   4 2396.94  124.69
  -2   2  -4 2257.33   98.53
   2  -2   4 2333.08  125.17
   2  -2   4 2378.38  103.77
  -2  -2  -4 2194.83   83.85
  -2  -2  -4 2389.91  112.37
   2  -2   4 2183.97  122.07
  -2  -2  -4 2230.53  108.40
  -2  -2  -4 2376.25  102.46
   2   2   5 4467.22  215.62
   2   2   5 4541.66  262.19
   2   2   5 4181.37  226.28
  -2   2  -5 4848.94  237.70
   2   2   5 4418.24  199.74
   2   2   5 4386.37  215.40
  -2   2  -5 4533.02  197.40
   2  -2   5 4887.01  211.77
   2  -2   5 4933.12  230.52
   2  -2   5 4605.67  225.14
   2  -2   5 4815.80  230.35
  -2  -2  -5 5041.39  252.20
  -2  -2  -5 4524.55  206.11
  -2  -2  -5 4824.36  201.74
   2   2   6 1785.71   97.56
   2   2   6 1622.60  142.81
   2   2   6 1612.65  108.69
  -2   2  -6 1799.73  101.45
   2   2   6 1547.55   63.29
   2   2   6 1557.05   93.92
  -2   2  -6 1641.45   78.47
   2  -2   6 1544.24   78.24
   2  -2   6 1565.01   88.59
   2  -2   6 1540.66   76.32
   2  -2   6 1487.98   86.65
  -2  -2  -6 1515.02   79.31
  -2  -2  -6 1471.31   79.70
  -2  -2  -6 1545.52   64.63
   2   2   7 2683.51  138.69
   2   2   7 2456.42  142.40
  -2   2  -7 2356.92  162.11
  -2   2  -7 2484.99  116.98
   2  -2   7 2581.27  171.25
   2  -2   7 2496.13  126.79
  -2  -2  -7 2554.26  122.81
   2  -2   7 2504.79  118.74
  -2   2  -8 1291.07   73.26
   2   2   8 1283.79   98.22
   2   2   8 1338.79  126.72
  -2   2  -8 1346.86   88.15
   2  -2   8 1448.34   78.30
  -2  -2  -8 1537.53   85.76
   2  -2   8 1537.60   93.07
  -2   2  -9 2647.04  130.74
   2   2   9 2555.16  158.24
   2   2   9 2468.75  144.75
  -2   2  -9 2755.23  147.46
   2  -2   9 2122.14  141.17
  -2  -2  -9 2639.51  132.93
   2  -2   9 2693.26  146.83
   2   2  10  880.45   89.65
  -2   2 -10  845.91   80.77
   2   2  10  821.63   76.74
  -2   2 -10  896.86   60.95
   2  -2  10  877.93  110.92
  -2  -2 -10  895.19   63.83
   2  -2  10  808.74   58.41
   2   2  11 2188.98  213.68
   2   2  11 2274.85  187.18
  -2   2 -11 2293.11  157.87
   2  -2  11 2611.46  147.31
   2  -2  11 2421.93  127.27
  -2  -2 -11 2538.22  133.28
   2   2  12 1620.44  110.81
   2   2  12 1672.92  125.25
  -2   2 -12 1715.34   97.14
   2  -2  12 1804.01  109.89
  -2  -2 -12 1661.36  130.23
   2  -2  12 1550.90   90.92
   2   2  13   94.61   43.78
   2   2  13  107.06   36.53
  -2   2 -13  105.62   27.34
   2  -2  13   91.09   48.51
   2  -2  13   75.19   23.80
  -2  -2 -13   84.54   27.00
   2   2  14 2921.53  211.24
   2   2  14 2606.94  186.18
  -2   2 -14 2419.33  129.92
   2  -2  14 2908.85  143.07
   2  -2  14 2662.21  126.37
  -2  -2 -14 2988.27  140.20
   2   3 -15 1077.34   60.82
  -2   3  15  985.63   82.11
  -2   3  15  979.81   66.71
  -2  -3  15  845.66   55.20
   2   3 -14  344.84   37.45
  -2   3  14  353.38   60.28
  -2   3  14  317.80   41.82
  -2  -3  14  334.40   38.00
   2   3 -13 1306.02  105.07
  -2   3  13 1296.11  106.70
  -2   3  13 1218.05   80.74
   2  -3 -13 1152.12   58.49
  -2  -3  13 1407.14   80.05
  -2  -3  13 1321.64  101.40
   2   3 -12  574.24   49.40
  -2   3  12  599.14   76.43
  -2   3  12  643.99   80.84
  -2  -3  12  561.75   51.26
  -2  -3  12  496.12   46.70
   2   3 -11 1681.53   90.98
  -2   3  11 1678.85  176.24
  -2   3  11 1420.28   72.98
  -2   3  11 1755.32  124.65
   2  -3 -11 1334.14   66.04
  -2  -3  11 1589.18   97.18
  -2  -3  11 1491.50   86.13
   2   3 -10  147.83   29.16
  -2   3  10  133.47   82.66
  -2   3  10  168.11   23.24
  -2   3  10  156.43   29.85
   2  -3 -10  192.25   18.99
  -2  -3  10    5.16   35.82
  -2  -3  10  216.36   29.85
   2   3  -9 1094.27   92.95
  -2   3   9 1017.85   57.35
   2   3  -9 1116.40   63.69
  -2   3   9 1106.25  135.43
  -2   3   9 1116.12   65.14
   2  -3  -9 1057.54   50.32
  -2  -3   9 1054.26   63.47
   2   3  -810104.81  537.60
  -2   3   810179.66  495.73
   2   3  -810459.33  495.81
  -2   3   811213.62  557.40
   2   3  -810165.97  514.74
  -2   3   810853.24  609.43
   2  -3  -811607.01  546.58
   2  -3  -811023.69  524.71
  -2  -3   8 9913.79  485.09
   2   3  -7 2846.86  124.61
   2   3  -7 2758.34  162.79
  -2   3   7 2511.94  114.42
   2   3  -7 2915.13  127.06
  -2   3   7 2705.44  122.14
  -2   3   7 2822.66  200.35
   2  -3  -7 2484.81  101.79
   2  -3  -7 2400.19  179.68
  -2  -3   7 2429.38  136.72
  -2  -3   7 2434.23  112.44
   2  -3  -7 2406.19  113.42
   2  -3  -7 2339.54  109.67
  -2  -3   7 2368.28  111.65
  -2   3   6 1233.98   60.72
   2   3  -6 1271.06  102.64
   2   3  -6 1289.40   64.70
   2   3  -6 1188.10   64.33
   2   3  -6 1255.68   62.57
   2   3  -6 1233.95   50.64
  -2   3   6 1093.94  133.48
  -2   3   6 1268.48   68.57
   2  -3  -6 1551.10  102.54
   2  -3  -6 1394.91   66.28
   2  -3  -6 1494.69   59.27
  -2  -3   6 1428.28   92.09
  -2  -3   6 1473.56   69.58
   2  -3  -6 1475.44   93.72
  -2  -3   6 1343.93   66.20
  -2   3   5 5500.91  229.07
   2   3  -5 5006.76  272.24
  -2   3   5 5181.23  261.37
   2   3  -5 5192.93  251.46
   2   3  -5 5255.60  229.82
  -2   3   5 5853.54  251.52
   2   3  -5 5597.31  258.32
   2  -3  -5 4770.41  283.36
   2  -3  -5 4549.60  183.42
  -2  -3   5 4466.49  288.09
  -2  -3   5 4552.06  199.32
   2  -3  -5 4387.67  235.98
   2  -3  -5 4236.82  185.79
  -2  -3   5 4436.38  220.54
  -2   3   416626.94  864.97
  -2   3   417448.59  888.86
   2   3  -416883.86  897.85
  -2   3   417413.53  845.52
   2   3  -416461.75  802.79
   2   3  -415690.53  787.14
  -2   3   416460.99  774.78
   2   3  -417195.45  836.21
   2  -3  -416670.10  859.00
   2  -3  -416127.85  838.27
   2  -3  -415871.97  762.00
  -2  -3   417962.64  921.61
  -2  -3   416808.22  845.25
  -2  -3   416588.60  803.96
   2  -3  -416345.98  758.32
   2  -3  -416630.12  780.19
  -2  -3   416417.46  807.62
  -2   3   3 4408.24  169.86
  -2   3   3 4134.82  212.75
   2   3  -3 4350.72  231.93
  -2   3   3 4279.49  220.42
   2   3  -3 4099.69  179.75
   2   3  -3 4175.56  180.32
  -2   3   3 4475.92  171.24
  -2   3   3 4195.17  182.08
   2   3  -3 4250.20  178.62
   2  -3  -3 4223.84  213.36
   2  -3  -3 4013.70  155.31
  -2  -3   3 4336.08  186.02
   2  -3  -3 4267.36  220.78
  -2  -3   3 4319.05  207.61
   2  -3  -3 4148.53  161.06
   2  -3  -3 4228.60  160.15
  -2  -3   3 4267.66  181.88
  -2   3   2 5302.85  208.48
  -2   3   2 5426.14  261.00
   2   3  -2 5400.10  272.10
  -2   3   2 5175.02  261.70
   2   3  -2 5519.01  269.49
   2   3  -2 5377.19  238.11
  -2   3   2 5285.15  198.37
  -2   3   2 5463.80  256.17
   2   3  -2 5035.08  236.99
   2  -3  -2 5534.51  267.44
   2  -3  -2 5337.43  202.50
  -2  -3   2 5720.58  245.44
   2  -3  -2 5506.02  251.03
  -2  -3   2 5808.47  252.25
   2  -3  -2 5734.22  234.23
   2  -3  -2 5565.22  214.77
  -2  -3   2 5976.74  249.99
  -2   3   1 6223.17  287.13
  -2   3   1 5959.48  293.31
  -2   3   1 6034.12  240.63
   2   3  -1 6116.80  266.34
   2   3  -1 5984.58  268.50
   2   3  -1 6048.56  257.76
  -2   3   1 6109.49  309.70
   2  -3  -1 6006.89  245.86
   2  -3  -1 6447.56  300.86
  -2  -3   1 6245.51  278.68
  -2  -3   1 6125.00  266.42
   2  -3  -1 6113.07  265.75
  -2  -3   1 6530.68  329.39
   2  -3  -1 5981.43  334.71
  -2  -3   1 6317.82  294.65
   2   3   0  465.89   23.90
   2   3   0  456.01   24.92
  -2   3   0  520.19   60.61
   2   3   0  498.68   42.39
   2   3   0  469.47   74.91
   2   3   0  496.27   36.90
  -2   3   0  509.51   43.56
  -2   3   0  480.73   50.14
  -2   3   0  455.84   24.34
   2  -3   0  607.18   52.00
   2  -3   0  688.93   33.20
   2  -3   0  646.62   29.44
  -2  -3   0  682.63   37.21
  -2  -3   0  643.30   43.31
  -2  -3   0  688.51   51.52
   2  -3   0  610.24   45.17
  -2  -3   0  686.02   62.54
   2   3   110145.05  471.07
  -2   3  -110416.39  442.69
  -2   3  -110465.93  566.30
   2   3   1 9775.49  454.39
   2   3   110021.53  459.25
  -2   3  -1 9946.96  450.54
   2   3   110380.44  476.24
  -2   3  -110122.94  489.97
   2  -3   110484.35  445.17
   2  -3   1 9918.84  478.65
  -2  -3  -1 9939.56  432.28
   2  -3   1 9653.97  427.74
  -2  -3  -1 9622.77  476.87
  -2  -3  -110598.96  492.81
   2  -3   110039.77  510.96
  -2  -3  -111050.91  500.37
   2   3   2 9420.95  428.44
  -2   3  -2 9283.37  453.35
   2   3   2 9449.51  440.28
  -2   3  -2 8808.13  387.45
   2   3   2 9644.96  440.26
   2   3   2 9032.15  413.56
  -2   3  -2 9260.72  455.11
   2   3   2 9213.03  424.72
  -2   3  -2 9331.53  390.61
   2   3   2 9544.29  441.13
   2  -3   2 9455.72  420.72
   2  -3   2 9151.32  381.83
   2  -3   2 8997.15  439.70
  -2  -3  -2 9240.84  393.94
   2  -3   2 8849.64  416.29
   2  -3   2 9150.72  381.47
  -2  -3  -2 8742.71  404.44
  -2  -3  -2 9451.13  437.37
   2  -3   2 9244.42  388.22
   2   3   3 3866.03  180.44
   2   3   3 3640.51  179.54
  -2   3  -3 3946.47  200.13
  -2   3  -3 3692.64  244.22
   2   3   3 3909.20  177.66
   2   3   3 3868.82  177.25
   2   3   3 3868.33  213.16
  -2   3  -3 3920.68  163.16
   2  -3   3 3899.84  152.48
   2  -3   3 3922.74  199.85
   2  -3   3 4120.57  167.00
  -2  -3  -3 3978.79  179.44
  -2  -3  -3 4250.41  188.21
   2   3   4 1901.35  101.16
   2   3   4 1921.07  108.64
  -2   3  -4 1939.84  113.60
  -2   3  -4 1992.80  121.00
   2   3   4 2007.11   91.34
   2   3   4 2022.39  129.38
   2   3   4 2008.66  102.16
  -2   3  -4 1933.08  104.45
   2  -3   4 1850.26   75.42
   2  -3   4 1953.22   84.48
  -2  -3  -4 1947.87   94.65
   2  -3   4 1830.21  109.45
  -2  -3  -4 1829.57   93.04
  -2  -3  -4 2016.15   93.29
   2   3   5 1809.97   92.87
   2   3   5 1690.71   96.42
   2   3   5 1633.10  101.56
  -2   3  -5 1676.47  107.75
   2   3   5 1753.31   79.75
   2   3   5 1636.50   91.27
  -2   3  -5 1644.25   94.85
   2  -3   5 1755.39  100.76
   2  -3   5 1806.95   93.22
   2  -3   5 1698.30   72.60
   2  -3   5 1688.79  102.06
  -2  -3  -5 1791.57   88.65
  -2  -3  -5 1667.40  114.52
  -2  -3  -5 1797.50   82.48
   2   3   6 9661.00  458.33
   2   3   6 9107.60  449.96
   2   3   6 8552.14  441.33
  -2   3  -6 8065.19  416.13
   2   3   6 9126.68  417.90
   2   3   6 8703.43  424.79
  -2   3  -6 8846.32  426.32
   2  -3   6 8768.26  406.58
   2  -3   6 8751.51  419.89
   2  -3   6 8338.12  388.60
   2  -3   6 8607.36  429.42
  -2  -3  -6 8746.92  438.76
  -2  -3  -6 8306.19  425.78
  -2   3  -7 1099.11   78.91
   2   3   7 1099.43   79.23
   2   3   7 1133.97   98.46
  -2   3  -7 1149.98  123.55
   2  -3   7  841.99   59.37
  -2  -3  -7  937.54   61.34
   2  -3   7  997.32   86.63
  -2  -3  -7  936.72   45.80
   2   3   8  207.80   46.62
   2   3   8  208.42   38.47
  -2   3  -8  215.31   46.34
   2  -3   8  191.18   35.04
   2  -3   8  198.63   22.86
  -2  -3  -8  216.87   35.62
   2   3   9  626.11  108.13
   2   3   9  583.57   60.22
  -2   3  -9  608.89   64.06
   2  -3   9  551.68   51.06
   2  -3   9  504.61   37.07
  -2  -3  -9  524.04   77.24
  -2   3 -10  428.25   43.84
   2   3  10  421.24   64.97
   2   3  10  411.63   53.58
  -2   3 -10  414.18   79.07
   2  -3  10  359.29   22.86
  -2  -3 -10  371.26   44.38
   2  -3  10  385.78   67.48
  -2   3 -11 1796.76  113.77
   2   3  11 1800.94  129.24
   2   3  11 1696.87  151.66
  -2   3 -11 1815.69  101.09
   2  -3  11 1728.90  103.50
  -2  -3 -11 1716.40   99.79
   2   3  12 1996.50  133.32
   2   3  12 1978.11  116.10
  -2   3 -12 1889.72  103.85
   2  -3  12 1521.57   92.56
  -2  -3 -12 1524.73  121.29
   2   3  13  833.06  117.92
   2   3  13  801.18   64.16
  -2   3 -13  646.15   77.68
   2  -3  13  636.99   45.94
  -2  -3 -13  683.23   52.61
   2   3  14    3.17   26.05
  -2   3 -14    5.65   15.58
  -2  -3 -14   16.98   14.36
   2   4 -15 1264.73   90.09
  -2   4  15 1293.26  140.64
   2   4 -14 1199.35   69.46
  -2   4  14 1259.85  101.09
  -2   4  14 1177.29   67.47
  -2  -4  14  991.23   83.30
   2   4 -13  386.71   40.93
  -2   4  13  382.95   66.23
  -2   4  13  364.80   37.29
  -2  -4  13  362.43   43.08
   2   4 -12  258.94   35.41
  -2   4  12  270.70   59.25
  -2   4  12  220.41   30.67
  -2  -4  12  305.52   42.93
  -2  -4  12  208.73   18.78
   2   4 -11 1110.68   70.43
  -2   4  11 1075.33   99.84
  -2   4  11 1091.65   61.49
  -2   4  11 1084.78   84.33
  -2  -4  11 1151.20   83.26
  -2  -4  11  724.02   58.70
   2   4 -10 1336.42  114.92
  -2   4  10 1437.57   75.71
   2   4 -10 1302.63  108.21
  -2   4  10 1345.12  111.11
  -2   4  10 1377.03   94.00
   2  -4 -10 1245.47   60.93
   2   4  -9 6969.02  388.52
  -2   4   9 7080.24  364.85
   2   4  -9 7185.86  372.20
  -2   4   9 6917.80  374.40
  -2   4   9 6461.03  329.77
   2  -4  -9 7303.96  342.09
   2   4  -8 2478.60  160.92
  -2   4   8 2329.64  113.98
   2   4  -8 2560.05  149.98
  -2   4   8 2520.38  150.46
  -2   4   8 2505.47  111.78
   2  -4  -8 2269.33   96.89
  -2  -4   8 2437.11  124.98
   2   4  -7 1853.92  127.54
  -2   4   7 1786.39  117.70
   2   4  -7 1854.78   90.78
   2   4  -7 1757.61   89.21
  -2   4   7 1991.36   95.48
  -2   4   7 1799.86   78.92
  -2   4   7 1807.45   79.50
   2  -4  -7 1653.72   68.92
  -2  -4   7 1544.28   87.42
   2   4  -6 1429.86   57.12
   2   4  -6 1535.13  114.29
  -2   4   6 1468.67  100.57
   2   4  -6 1581.19   78.18
   2   4  -6 1495.84   66.66
  -2   4   6 1573.56   80.87
  -2   4   6 1531.52   64.36
   2   4  -6 1499.57   65.31
  -2   4   6 1525.47   64.83
  -2  -4   6 1431.09   95.41
  -2  -4   6 1563.51   75.72
   2  -4  -6 1453.29   80.05
   2  -4  -6 1425.68   91.45
  -2  -4   6 1545.02   68.69
   2  -4  -6 1539.14   71.54
  -2   4   5  195.16   15.61
   2   4  -5  224.29   51.65
  -2   4   5  184.35   21.37
   2   4  -5  212.84   29.33
   2   4  -5  218.06   27.21
   2   4  -5  217.55   18.51
  -2   4   5  231.12   45.39
  -2   4   5  223.28   30.82
   2  -4  -5  276.18   16.49
  -2  -4   5  270.30   29.26
  -2  -4   5  265.30   18.31
   2  -4  -5  250.28   33.73
  -2  -4   5  238.11   20.60
   2  -4  -5  275.43   42.28
  -2   4   4 8171.98  399.71
   2   4  -4 7918.55  404.34
   2   4  -4 8081.76  361.38
   2   4  -4 8256.15  376.45
  -2   4   4 7810.38  322.65
   2   4  -4 8989.56  381.38
  -2   4   4 7879.62  327.26
  -2   4   4 8095.02  395.47
  -2  -4   4 7269.45  328.15
  -2  -4   4 7198.69  320.86
   2  -4  -4 7232.93  337.13
  -2  -4   4 7102.11  327.08
   2  -4  -4 7225.13  356.17
  -2   4   3 7443.73  362.77
  -2   4   3 7222.17  286.72
   2   4  -3 7050.68  360.08
  -2   4   3 6795.83  269.86
   2   4  -3 6809.32  339.00
   2   4  -3 7324.77  346.73
  -2   4   3 6935.33  301.22
   2   4  -3 7644.18  336.11
  -2   4   3 7250.34  408.23
  -2   4   3 7599.59  318.57
   2  -4  -3 7622.79  341.65
  -2  -4   3 7494.36  333.59
  -2  -4   3 7985.90  350.65
   2  -4  -3 7493.42  360.36
   2  -4  -3 7293.28  303.67
  -2  -4   3 7943.20  337.90
   2  -4  -3 7874.25  331.21
  -2   4   2 7496.68  334.38
   2   4  -2 7798.45  330.16
   2   4  -2 7019.33  351.27
  -2   4   2 7321.01  337.87
   2   4  -2 7423.27  336.95
  -2   4   2 7607.59  319.58
   2   4  -2 7268.90  354.20
  -2   4   2 7424.72  364.86
   2  -4  -2 7947.27  339.75
   2  -4  -2 8016.82  329.54
  -2  -4   2 7743.30  378.87
   2  -4  -2 7658.42  337.75
  -2  -4   2 8028.61  361.28
   2  -4  -2 7589.47  404.61
  -2  -4   2 7899.19  352.36
   2   4  -1 2546.14  101.73
  -2   4   1 2666.64  177.57
  -2   4   1 2507.80  135.15
   2   4  -1 2656.35  121.15
  -2   4   1 2650.39  114.97
   2   4  -1 2583.36  120.06
  -2   4   1 2604.60  109.76
   2  -4  -1 2479.07  120.12
   2  -4  -1 2613.62   95.99
  -2  -4   1 2457.16  115.43
   2  -4  -1 2425.36   99.42
  -2  -4   1 2552.98  153.60
   2  -4  -1 2506.02  123.47
  -2  -4   1 2569.94  120.55
  -2   4   0 2006.10   80.79
   2   4   0 1955.52   78.75
   2   4   0 1909.01   72.44
  -2   4   0 1954.09  110.68
   2   4   0 1961.99  100.78
   2   4   0 1955.64   98.47
  -2   4   0 2022.82   98.38
   2   4   0 2090.78  100.93
  -2   4   0 1937.91  129.33
   2  -4   0 2471.84   89.24
   2  -4   0 2329.09  100.47
  -2  -4   0 2356.43   95.03
  -2  -4   0 2405.15  138.48
   2  -4   0 2404.84  131.03
  -2  -4   0 2470.61  119.42
   2  -4   0 2374.42  104.38
  -2  -4   0 2287.99   92.59
   2   4   1 4708.29  202.90
  -2   4  -1 4853.74  200.11
  -2   4  -1 4704.59  261.73
   2   4   1 4683.96  213.53
   2   4   1 4945.90  218.35
  -2   4  -1 4557.16  185.29
   2   4   1 4886.96  204.39
  -2   4  -1 4768.89  270.89
   2  -4   1 4802.17  188.47
   2  -4   1 4355.85  205.24
  -2  -4  -1 4450.41  177.12
   2  -4   1 4629.30  185.18
  -2  -4  -1 4578.33  204.93
  -2  -4  -1 4549.85  212.81
   2  -4   1 4501.58  201.22
   2   4   2 7390.15  328.78
  -2   4  -2 7208.42  295.29
   2   4   2 7520.11  336.28
  -2   4  -2 7281.67  353.33
   2   4   2 6971.28  321.87
  -2   4  -2 7248.87  314.50
   2   4   2 8963.69  437.86
   2   4   2 7181.54  321.39
  -2   4  -2 7748.03  379.43
   2  -4   2 8059.72  384.83
   2  -4   2 8204.71  345.59
   2  -4   2 7976.75  335.20
  -2  -4  -2 7681.67  347.43
  -2  -4  -2 8291.15  380.05
   2  -4   2 7701.50  349.29
   2   4   3 2373.46  109.67
   2   4   3 2461.10  115.03
  -2   4  -3 2401.44  136.86
  -2   4  -3 2263.37  112.02
   2   4   3 2421.87  113.52
   2   4   3 2381.63  104.87
   2   4   3 2385.58  106.60
  -2   4  -3 2392.76  153.53
   2  -4   3 2175.29  122.22
   2  -4   3 2279.16  105.32
  -2  -4  -3 2205.79  135.18
  -2  -4  -3 2228.16  110.55
   2   4   4 1336.60   95.99
   2   4   4 1248.56   73.09
  -2   4  -4 1240.09   92.59
   2   4   4 1336.82   68.01
   2   4   4 1292.32   68.46
   2   4   4 1227.56   62.94
  -2   4  -4 1315.32   79.08
  -2   4  -4 1250.11   59.82
   2  -4   4 1463.48   63.77
   2  -4   4 1463.66   91.99
  -2  -4  -4 1224.55   68.02
  -2  -4  -4 1335.44   73.08
  -2  -4  -4 1422.03   75.19
   2   4   5 2560.18  141.52
   2   4   5 2531.97  155.13
   2   4   5 2658.54  135.42
  -2   4  -5 2541.98  112.03
   2   4   5 2761.52  147.47
   2   4   5 2557.85  118.44
  -2   4  -5 2704.61  151.98
   2  -4   5 2247.80  109.56
  -2  -4  -5 2253.80  110.78
   2  -4   5 2242.69  101.74
  -2  -4  -5 2333.67  114.57
  -2   4  -6 3930.67  177.20
   2   4   6 3849.39  230.02
   2   4   6 3902.82  176.43
   2   4   6 3996.96  188.19
  -2   4  -6 4213.95  276.60
  -2  -4  -6 4016.93  187.87
   2  -4   6 4107.66  192.26
  -2   4  -7 2001.69  134.13
   2   4   7 1883.39  113.08
   2   4   7 1916.42  126.26
  -2   4  -7 1857.65   92.84
   2  -4   7 1616.22  108.24
  -2  -4  -7 1576.80  119.31
  -2   4  -8 5379.41  256.56
   2   4   8 5332.19  283.16
   2   4   8 5210.13  268.33
   2   4   8 5071.41  255.75
  -2   4  -8 5421.07  302.47
  -2  -4  -8 5641.95  273.31
   2  -4   8 5464.92  268.06
  -2   4  -9 5743.21  316.67
   2   4   9 5582.49  303.31
   2   4   9 5929.77  293.32
  -2   4  -9 5578.74  273.02
   2  -4   9 5678.14  283.79
  -2  -4  -9 5673.65  278.36
  -2   4 -10 1947.68  181.23
   2   4  10 1813.53  121.69
   2   4  10 1762.84  132.09
  -2   4 -10 1713.03   95.73
   2  -4  10 1356.90  104.92
  -2  -4 -10 1517.26  125.19
   2   4  11 6466.63  347.13
   2   4  11 6575.59  326.86
  -2   4 -11 6272.68  346.36
  -2   4 -11 5618.45  318.56
  -2  -4 -11 6505.16  321.34
   2   4  12  752.28  110.67
   2   4  12  699.24   56.74
  -2   4 -12  638.50   62.26
  -2   4 -12  699.66   76.46
  -2  -4 -12  679.79   52.93
   2   4  13  467.79   60.54
   2   4  13  449.89   67.08
  -2   4 -13  465.21   39.89
  -2  -4 -13  397.00   39.61
   2   5 -14 1354.79  103.76
  -2   5  14 1331.16  104.95
  -2  -5  14 1209.75   98.33
   2   5 -13 1491.64   83.62
  -2   5  13 1448.59  164.91
  -2  -5  13 1283.65   88.88
   2   5 -12 1779.16   97.39
  -2   5  12 1767.34  129.78
  -2  -5  12 1566.08  109.61
   2   5 -11  196.48   35.12
  -2   5  11  201.62   54.48
  -2   5  11  193.25   27.12
  -2  -5  11  144.18   46.15
   2   5 -10 1377.72   83.60
  -2   5  10 1392.58  113.20
  -2   5  10 1391.46   80.20
   2   5  -9  244.91   68.80
   2   5  -9  261.53   37.54
  -2   5   9  256.25   58.33
  -2   5   9  269.09   57.69
   2   5  -8 3129.60  203.64
   2   5  -8 3281.00  159.04
  -2   5   8 3344.83  192.22
  -2   5   8 3148.12  157.40
   2   5  -7 4642.81  265.96
  -2   5   7 5056.11  233.56
   2   5  -7 4461.18  209.12
  -2   5   7 4663.02  246.86
   2  -5  -7 4336.42  186.10
   2   5  -6 1366.97  104.50
  -2   5   6 1326.26   73.29
   2   5  -6 1229.64   67.96
  -2   5   6 1284.55   88.12
   2  -5  -6 1087.65   46.40
   2   5  -5 1022.24   57.48
   2   5  -5 1128.45   88.23
  -2   5   5 1060.49  107.38
   2   5  -5  984.79   42.45
  -2   5   5  987.95   59.39
   2  -5  -5  810.69   64.91
   2  -5  -5  831.95   36.27
  -2  -5   5  769.73   37.31
   2   5  -4 1555.20  104.39
   2   5  -4 1495.76  103.78
   2   5  -4 1528.96   66.74
  -2   5   4 1521.39   93.79
  -2   5   4 1494.88  100.55
   2  -5  -4 1635.35  117.66
   2  -5  -4 1465.97  103.81
  -2  -5   4 1534.65   76.85
  -2  -5   4 1536.28   69.30
  -2   5   3 3311.81  173.18
   2   5  -3 3462.16  179.64
   2   5  -3 3290.25  151.53
   2   5  -3 3255.02  141.50
  -2   5   3 3347.68  169.41
  -2   5   3 3464.72  138.33
   2  -5  -3 3656.80  173.11
  -2  -5   3 3697.20  162.50
  -2  -5   3 3716.60  159.66
   2  -5  -3 3559.61  177.59
   2   5  -2 4853.96  212.39
  -2   5   2 4777.18  229.82
   2   5  -2 4668.36  227.16
  -2   5   2 4929.67  234.75
   2   5  -2 4703.95  211.70
  -2   5   2 4643.07  195.60
  -2   5   2 5054.63  205.03
   2  -5  -2 4936.49  201.81
   2  -5  -2 4781.88  224.11
  -2  -5   2 4769.74  237.09
   2  -5  -2 4506.45  187.39
  -2  -5   2 4916.30  218.85
   2  -5  -2 4772.20  220.90
  -2   5   1 1811.08   95.52
  -2   5   1 1883.74   73.74
  -2   5   1 1852.26   82.77
   2   5  -1 1812.82  114.02
   2   5  -1 1870.95   88.33
  -2   5   1 1816.59   93.12
   2  -5  -1 1520.18   66.69
  -2  -5   1 1605.70   74.97
   2  -5  -1 1610.94   61.41
  -2  -5   1 1583.65   80.98
   2  -5  -1 1509.59   65.81
  -2  -5   1 1536.74  104.91
   2  -5  -1 1484.70   95.89
  -2   5   0  748.16   54.07
  -2   5   0  765.14   36.52
  -2   5   0  769.22   50.40
   2   5   0  703.39   50.45
   2   5   0  783.95   77.98
  -2   5   0  769.19   49.21
   2  -5   0  994.97   62.42
  -2  -5   0  950.64   40.93
   2  -5   0 1040.97   46.26
  -2  -5   0 1016.66   56.54
   2  -5   0  960.73   40.72
  -2  -5   0  972.32   60.35
   2  -5   0  955.14   48.13
  -2   5  -1 2335.60  115.29
  -2   5  -1 2365.41  118.28
   2   5   1 2182.57   85.98
   2   5   1 2280.02  108.54
  -2   5  -1 2405.74   99.98
  -2   5  -1 2293.33   93.15
   2  -5   1 2158.44   92.60
   2  -5   1 2251.54  106.49
   2  -5   1 2342.35   89.60
   2  -5   1 2198.17   98.03
  -2  -5  -1 2350.21  118.33
  -2  -5  -1 2333.26  134.51
  -2   5  -2  963.56   68.33
  -2   5  -2  956.65   54.06
   2   5   2  894.09   55.55
   2   5   2  919.10   47.73
   2   5   2  916.05   40.71
  -2   5  -2  941.55   57.76
   2  -5   2  861.79   60.10
   2  -5   2  795.82   35.50
  -2  -5  -2  800.20   51.99
   2   5   3 5277.85  249.96
   2   5   3 5161.62  235.17
  -2   5  -3 5567.94  279.33
  -2   5  -3 5364.69  231.11
   2   5   3 5594.53  253.30
   2   5   3 5108.41  220.08
   2   5   3 5524.68  247.99
  -2   5  -3 5567.97  265.11
   2  -5   3 5762.10  281.18
   2  -5   3 5781.63  255.18
   2   5   4 3097.04  157.06
   2   5   4 2620.48  128.79
  -2   5  -4 2937.35  126.73
   2   5   4 2906.70  141.21
   2   5   4 2833.98  121.95
   2   5   4 2803.91  123.91
  -2   5  -4 2912.47  144.73
  -2   5  -4 2910.09  164.05
   2  -5   4 3068.94  129.75
  -2   5  -5 8239.64  383.18
   2   5   5 8863.28  430.04
   2   5   5 8873.32  448.80
   2   5   5 8350.50  389.64
  -2   5  -5 8986.84  525.89
  -2  -5  -5 8246.11  392.13
   2  -5   5 8078.37  385.37
  -2   5  -6  964.95   74.31
   2   5   6 1052.23   69.37
   2   5   6  980.08   59.43
   2   5   6  952.91   67.62
  -2   5  -6 1055.17   97.45
  -2  -5  -6  864.56   60.63
   2  -5   6  822.80   47.91
   2   5   7  429.62   47.67
   2   5   7  447.06   35.77
  -2   5  -7  409.34   73.95
  -2   5  -7  410.63   56.92
  -2  -5  -7  644.86   74.85
   2   5   8  777.42   65.21
   2   5   8  755.87   64.57
   2   5   8  741.93   50.47
  -2   5  -8  720.88   87.65
  -2   5  -8  745.96   72.73
  -2  -5  -8  584.96   55.55
   2   5   9   65.52   44.68
   2   5   9   34.76   28.85
  -2   5  -9   -7.67   63.83
  -2   5  -9   21.83   20.30
  -2  -5  -9   26.35   23.89
   2   5  10  481.67   88.37
   2   5  10  430.37   40.28
  -2   5 -10  457.94   81.86
  -2   5 -10  493.38   42.31
  -2  -5 -10  558.63   76.26
   2   5  11  327.46   51.10
   2   5  11  319.96   34.31
  -2   5 -11  332.77   62.13
  -2   5 -11  334.92   36.03
  -2  -5 -11  440.08   39.77
   2   5  12 1742.45  107.17
   2   5  12 1665.18   83.58
  -2   5 -12 1751.23   87.46
  -2  -5 -12 1320.28   77.64
   2   6 -13 2393.32  121.39
  -2   6  13 2308.49  143.17
  -2  -6  13 2547.12  140.70
   2   6 -12  472.85   75.09
  -2   6  12  450.24   66.59
  -2  -6  12  567.01   63.54
   2   6 -11  616.29   81.21
  -2   6  11  605.97  117.65
  -2   6  11  600.17   48.73
  -2  -6  11  789.52   75.06
   2   6 -10 1919.25  136.58
  -2   6  10 1887.12  179.34
  -2   6  10 1776.35  104.85
  -2  -6  10 1870.21  128.91
   2   6  -9 2481.97  162.12
  -2   6   9 2683.85  208.91
  -2   6   9 2636.28  170.55
   2   6  -8 2901.84  193.47
   2   6  -8 2772.75  174.87
  -2   6   8 2997.52  224.74
  -2   6   8 2847.55  147.65
   2   6  -7 1921.85  145.17
   2   6  -7 1971.52  140.00
  -2   6   7 1979.70  168.60
  -2   6   7 1923.95  107.13
   2   6  -6  750.77   83.82
   2   6  -6  766.44   83.77
  -2   6   6  785.61   67.77
  -2   6   6  783.81   59.19
   2   6  -5 5608.42  302.05
   2   6  -5 5810.75  271.22
  -2   6   5 5831.08  294.34
  -2   6   5 5393.90  259.05
   2   6  -4   10.88   19.08
   2   6  -4    1.86   14.39
   2   6  -4    2.87   12.13
  -2   6   4   -5.78   16.24
  -2   6   4    1.15   22.46
   2   6  -3   84.26   23.82
   2   6  -3   66.59   25.09
  -2   6   3   81.23   25.67
  -2   6   3   75.75   10.89
  -2   6   3   77.14   34.06
  -2  -6   3  -11.23   20.51
  -2   6   2 8698.53  401.35
  -2   6   2 9521.07  461.91
   2   6  -2 9516.79  478.09
   2   6  -2 9161.12  448.05
  -2   6   2 9018.42  450.19
  -2  -6   2 9840.74  470.23
   2  -6  -2 9452.41  450.99
   2  -6  -2 9796.56  429.46
  -2   6   1  443.54   26.14
  -2   6   1  440.89   43.27
   2   6  -1  449.29   42.33
   2   6  -1  434.03   57.51
  -2   6   1  421.88   40.83
   2  -6  -1  567.75   30.68
   2  -6  -1  589.38   35.18
   2  -6  -1  600.85   26.23
  -2   6   0 1319.17   92.37
  -2   6   0 1276.55   85.68
  -2   6   0 1254.47   65.37
   2   6   0 1193.73   69.90
   2   6   0 1263.80   70.85
  -2   6   0 1236.72   65.65
   2  -6   0 1244.78   62.59
   2  -6   0 1238.45   68.87
   2  -6   0 1302.27   58.38
   2  -6   0 1298.07   71.26
  -2   6  -1  222.09   48.54
  -2   6  -1  162.41   16.89
  -2   6  -1  173.99   24.78
   2   6   1  172.56   49.27
   2   6   1  213.22   31.83
   2  -6   1  184.60   14.16
   2  -6   1  169.23   17.62
   2  -6   1  189.05   35.05
   2   6   2  919.36   59.91
  -2   6  -2  915.75   68.64
  -2   6  -2 1011.55  100.81
  -2   6  -2  969.98   46.77
   2   6   3 4128.33  194.47
   2   6   3 3919.40  191.41
  -2   6  -3 4328.54  267.73
  -2   6  -3 4129.52  181.62
   2   6   4 7781.73  395.50
  -2   6  -4 6200.42  332.08
  -2   6  -4 5511.95  271.77
   2   6   5 1306.77   76.93
  -2   6  -5 1319.12  108.26
  -2   6  -5 1183.78   60.68
  -2  -6  -5 1050.20   68.31
  -2   6  -6 3135.88  196.86
  -2   6  -6 2936.55  134.91
  -2  -6  -6 2773.98  141.01
   2   6   7   56.06   22.15
  -2   6  -7   53.54   47.79
  -2   6  -7   49.18   18.69
  -2  -6  -7  101.08   43.27
   2   6   8 3240.73  165.61
   2   6   8 3016.93  148.08
  -2   6  -8 3172.32  267.27
  -2   6  -8 3217.89  151.91
  -2  -6  -8 3331.03  164.98
   2   6   9 1255.23   80.80
   2   6   9 1105.07   60.89
  -2   6  -9 1362.41  186.30
  -2   6  -9 1275.57   70.52
  -2  -6  -9 1417.22   81.53
   2   6  10  774.30   60.13
  -2   6 -10  747.57   96.98
  -2   6 -10  762.00   50.87
  -2  -6 -10  850.44   83.90
   2   6  11  725.54   55.75
  -2   6 -11  769.03   82.91
  -2   6 -11  749.99   67.02
  -2  -6 -11  719.11   49.99
  -2   6 -12  661.67   42.63
   2  -6  12  776.33   63.08
  -2  -6 -12  625.26   60.98
   2   7 -12  346.53   37.58
  -2   7  12  323.32   47.42
   2  -7 -12  104.75   30.53
  -2  -7  12  232.30   46.69
   2   7 -11  819.18   61.01
  -2   7  11  776.40   72.23
  -2   7  11  773.89   59.11
  -2  -7  11  758.31   75.87
   2   7 -10   31.39   24.77
  -2   7  10   29.11   30.73
  -2   7  10   37.37   25.42
  -2  -7  10   41.80   35.29
   2   7  -9   24.58   25.62
  -2   7   9   35.54   29.80
  -2   7   9   26.82   43.15
  -2  -7   9   46.62   34.04
   2   7  -8  488.86   49.80
  -2   7   8  503.36   59.07
  -2   7   8  503.65   49.98
  -2  -7   8  449.57   60.80
   2   7  -7 1021.94   69.31
  -2   7   7 1018.56   77.47
  -2   7   7  977.34   70.49
  -2  -7   7 1077.82   84.50
   2   7  -6 2132.52  113.49
  -2   7   6 2170.10  123.87
  -2   7   6 2025.83  113.07
   2   7  -5  138.27   31.28
  -2   7   5  150.30   32.10
  -2   7   5  141.77   30.43
  -2  -7   5   11.19   29.82
   2   7  -4   46.75   25.62
   2   7  -4   45.70   11.82
  -2   7   4  131.71   41.41
  -2   7   4   34.32   23.24
  -2  -7   4   76.84   24.41
   2   7  -3 2174.39  148.11
   2   7  -3 2149.68   99.26
  -2   7   3 2185.79  116.68
  -2   7   3 2088.82  105.73
  -2  -7   3 2213.31  110.41
   2   7  -2  349.56   43.89
   2   7  -2  336.45   30.37
  -2   7   2  325.45   34.76
  -2   7   2  341.06   31.17
   2   7  -1 6323.75  301.82
   2   7  -1 6243.07  291.67
  -2   7   1 6188.84  284.38
   2   7   0 4661.31  221.24
   2   7   0 4685.24  219.21
  -2   7   0 4372.98  190.19
  -2   7   0 4310.11  189.37
   2   7   1  923.36   63.87
   2   7   1  994.06   65.24
  -2   7  -1  937.46   60.36
  -2   7  -1  924.55   46.17
   2   7   2 2250.68  117.77
  -2   7  -2 2345.05  130.14
  -2   7  -2 2261.93  114.21
   2   7   3 2674.98  135.77
  -2   7  -3 2751.55  153.27
  -2   7  -3 2611.67  119.03
  -2   7  -4 2714.22  160.60
  -2   7  -4 2633.88  120.85
  -2  -7  -4 2385.07  122.91
  -2   7  -5 1759.73  122.85
  -2   7  -5 1631.34   80.39
  -2  -7  -5 1406.67   82.42
  -2   7  -6   75.43   44.13
  -2   7  -6   59.35   18.35
  -2   7  -7  149.20   97.60
  -2   7  -7  129.84   23.13
  -2  -7  -7  145.53   48.08
   2   7   8 1766.01   92.17
  -2   7  -8 1875.24  149.57
  -2   7  -8 1763.27   88.23
  -2  -7  -8 1645.13   93.58
   2   7   9   46.34   16.32
  -2   7  -9   17.91   49.37
  -2   7  -9   62.01   18.26
  -2  -7  -9   74.59   23.74
   2   7  10  404.82   31.46
   2   7  10  407.63   28.73
  -2   7 -10  644.25   79.36
  -2   7 -10  607.80   38.99
  -2  -7 -10  716.67   43.90
   2  -7  11  471.38   54.40
  -2  -7 -11  410.67   32.47
   2   8 -11  226.48   55.12
  -2   8  11  180.78   31.00
  -2  -8  11  246.04   72.27
   2   8 -10 1396.87  111.39
  -2   8  10 1390.25  112.97
  -2   8  10 1217.46   82.14
  -2  -8  10 1269.25   92.16
   2   8  -9  634.00   53.82
  -2   8   9  695.85   86.81
  -2   8   9  631.23   62.29
  -2  -8   9  671.02   67.33
   2   8  -8  146.81   32.62
  -2   8   8  162.42   54.94
  -2   8   8  169.34   63.46
  -2  -8   8  175.61   40.28
   2   8  -7 1042.52  101.20
  -2   8   7 1076.36   98.81
  -2   8   7 1004.31  111.39
  -2  -8   7 1112.54   79.16
   2   8  -6  129.33   55.55
  -2   8   6  125.19   29.09
  -2   8   6  133.76   32.61
  -2  -8   6  163.47   32.36
   2   8  -5 2280.78  153.56
  -2   8   5 2186.51  115.73
  -2  -8   5 2257.64  121.33
   2   8  -4 1877.86  103.54
  -2   8   4 1854.89   97.53
  -2  -8   4 1611.26   87.51
   2   8  -3 2379.68  126.44
   2   8  -3 2249.95  113.65
  -2   8   3 2282.53  113.16
   2   8  -210693.47  531.44
   2   8  -210913.28  549.92
  -2   8   210373.57  513.94
   2   8  -1  832.24   63.71
   2   8  -1  754.19   67.05
  -2   8   1  782.28   43.52
   2   8   0  328.46   67.71
   2   8   0  395.98   59.66
   2   8   1 1432.07   84.30
   2   8   2  639.71   52.96
  -2   8  -3 6208.41  348.85
  -2   8  -3 5275.63  245.41
  -2   8  -4 3611.60  241.76
  -2   8  -4 3136.47  158.63
  -2  -8  -4 3445.66  165.20
  -2   8  -5  116.68   42.91
  -2   8  -5   83.14   25.44
  -2  -8  -5   79.64   24.74
  -2   8  -6   11.08   33.04
  -2   8  -6    5.16   19.13
  -2  -8  -6   34.38   31.46
  -2   8  -7 1023.79   97.82
  -2   8  -7  921.25   52.85
  -2  -8  -7  942.05   60.98
  -2   8  -8  844.28   90.90
  -2   8  -8  748.50   59.14
  -2  -8  -8  766.68   52.51
   2   8   9 1422.66   91.99
  -2   8  -9 1810.06  128.06
  -2   8  -9 1249.07   85.70
  -2  -8  -9 1846.75  105.88
   2   9  -9  275.63   35.57
  -2   9   9  280.18   44.00
  -2  -9   9  277.34   63.63
   2   9  -8  640.47   50.81
  -2   9   8  576.22   59.93
  -2  -9   8  696.38   79.41
   2   9  -7  284.92   37.03
  -2   9   7  255.82   45.73
  -2  -9   7  278.63   35.14
   2   9  -6 1115.12   70.98
  -2   9   6 1030.13  106.04
  -2  -9   6 1148.19   67.66
   2   9  -5  160.99   31.63
  -2   9   5  141.56   53.81
   2   9  -4  790.43   58.95
  -2   9   4  746.33   51.07
   2   9  -3  579.86   49.35
  -2   9   3  515.56   38.09
   2   9  -2  507.69   71.91
   2   9  -2  498.71   33.18
  -2   9   2  464.95   32.66
   2   9  -1  211.73   34.34
   2   9  -1  190.26   24.46
   2   9   0  614.53   50.16
   2   9   0  618.07   45.14
   2   9   1  846.78   59.65
   2   9   1  862.98   57.33
  -2  -9  -2    1.85   13.90
  -2  -9  -3 1096.37   66.79
   2   9   4  519.84   73.24
  -2   9  -4  249.11   39.51
  -2  -9  -4  305.48   34.04
   2   9   5  410.60   46.28
  -2   9  -5  377.86   50.99
  -2  -9  -5  382.50   57.77
  -2   9  -6  245.50   47.73
  -2  -9  -6  322.87   33.58
   2  -9   7    1.41   16.09
   2  10  -6  103.12   42.99
  -2  10   6  116.44   29.62
   2  10  -5  993.05   85.89
  -2  10   5  945.25   63.42
   2  10  -4  723.09   51.17
  -2  10   4  663.29   48.59
   2  10  -3 2673.22  129.12
  -2  10   3 2608.95  123.08
   2  10  -2 2345.86  116.83
   2  10  -1  346.39   37.34
   2  10  -1  316.60   37.64
   2  10   0  169.21   29.53
  -2 -10   0   -4.28   21.13
   2  10   1  208.53   44.69
  -2 -10  -1  198.23   28.54
  -2 -10  -2  359.99   33.95
  -2 -10  -3  399.03   33.17
   2  10   5 2761.59  141.58
  -3   0  16  860.19   74.29
   3   0 -15  299.24   33.69
  -3   0  15 1737.47  115.27
   3   0 -14 1035.86   52.46
  -3   0  14 1163.91   72.28
  -3   0  14 1304.93   92.83
   3   0 -13 1703.99   81.60
  -3   0  13 1647.65   97.43
  -3   0  13 1755.50  114.43
   3   0 -12 3084.11  155.87
  -3   0  12 2988.89  185.73
  -3   0  12 2904.50  166.34
   3   0 -11   58.85   23.43
  -3   0  11   84.00   39.47
  -3   0  11   64.54   32.78
   3   0 -10   51.24   12.74
   3   0 -10   39.13   18.68
   3   0 -10   49.02    9.34
  -3   0  10   50.60   22.20
  -3   0  10   45.36   28.81
   3   0  -9 2340.62  108.16
   3   0  -9 2182.10   92.52
   3   0  -9 2273.36  102.37
   3   0  -9 2326.16   96.64
  -3   0   9 2309.86  114.47
  -3   0   9 2151.26  112.32
  -3   0   9 2237.48  100.22
  -3   0   9 2192.68  155.17
   3   0  -8 5297.77  238.09
   3   0  -8 5182.58  218.84
   3   0  -8 5430.26  241.11
   3   0  -8 5322.68  227.03
   3   0  -8 5432.40  259.30
  -3   0   8 5507.19  255.25
  -3   0   8 5170.57  233.09
  -3   0   8 5593.74  251.86
  -3   0   8 5414.29  230.86
  -3   0   8 5372.95  294.02
   3   0  -7 2737.98  122.61
   3   0  -7 2621.80  104.13
   3   0  -7 2748.57  124.57
   3   0  -7 2781.46  116.58
   3   0  -7 2645.13  135.57
  -3   0   7 2641.04  127.54
  -3   0   7 2583.13  119.68
  -3   0   7 2682.93  126.31
  -3   0   7 2626.08  108.53
  -3   0   7 2993.72  184.98
   3   0  -6 3731.25  169.88
   3   0  -6 3748.36  148.28
   3   0  -6 3930.72  177.62
   3   0  -6 3968.85  193.52
   3   0  -6 4718.40  255.58
  -3   0   6 3801.46  207.61
  -3   0   6 3829.60  177.52
  -3   0   6 3965.16  188.97
  -3   0   6 3803.34  152.90
  -3   0   6 4128.19  197.49
   3   0  -5  213.57   29.85
   3   0  -5  207.19   22.76
   3   0  -5  194.21   32.34
   3   0  -5  210.82   27.82
   3   0  -5  187.23   36.80
  -3   0   5  205.54   34.13
  -3   0   5  206.11   58.90
  -3   0   5  206.08   39.92
  -3   0   5  203.32   24.42
  -3   0   5  181.63   38.01
   3   0  -4  501.21   42.31
   3   0  -4  482.24   21.21
   3   0  -4  490.43   45.33
   3   0  -4  511.47   39.27
   3   0  -4  435.90   78.13
  -3   0   4  488.75   44.95
  -3   0   4  459.31   82.30
  -3   0   4  470.60   64.66
  -3   0   4  464.03   20.51
  -3   0   4  409.07   48.79
   3   0  -3 3308.26  152.47
   3   0  -3 3265.13  114.48
   3   0  -3 3448.01  158.26
   3   0  -3 3525.15  186.48
   3   0  -3 3552.34  163.75
  -3   0   3 3544.28  162.95
  -3   0   3 3150.04  161.13
  -3   0   3 3295.60  121.39
  -3   0   3 3134.17  156.71
   3   0  -2   27.47   23.62
   3   0  -2   24.69   29.31
   3   0  -2   27.57    9.20
   3   0  -2   19.66   22.28
   3   0  -2    1.73   20.13
   3   0  -2   -2.71   23.98
  -3   0   2   28.05   43.86
  -3   0   2   23.70   30.21
  -3   0   2   20.79    4.49
  -3   0   2   18.78   24.69
   3   0  -158224.59 3551.99
   3   0  -153470.62 3359.75
   3   0  -158889.74 3596.59
   3   0  -156783.90 3449.36
  -3   0   153915.75 3374.23
  -3   0   155604.99 3405.46
  -3   0   155346.43 3242.27
  -3   0   157807.88 3504.58
   3   0   0 7164.01  414.34
   3   0   0 7376.24  356.23
   3   0   0 7694.17  334.00
   3   0   0 8167.98  430.39
  -3   0   0 7583.52  368.54
  -3   0   0 7413.24  415.75
  -3   0   0 7384.52  298.46
  -3   0   0 8106.77  343.20
  -3   0   0 7368.72  346.89
   3   0   111604.87  581.04
   3   0   111682.46  615.67
   3   0   111931.31  535.34
  -3   0  -111540.81  580.77
  -3   0  -111743.25  569.43
  -3   0  -111660.94  534.39
  -3   0  -112106.45  558.01
  -3   0  -111741.66  526.58
  -3   0  -111574.54  603.12
   3   0   222824.16 1262.49
   3   0   220192.49 1040.12
   3   0   220107.66  972.60
  -3   0  -218240.11  988.84
  -3   0  -220908.44 1118.94
  -3   0  -220108.54  989.86
  -3   0  -219832.26  980.64
  -3   0  -220809.41 1008.22
  -3   0  -221632.46 1102.21
   3   0   3   16.00   25.05
   3   0   3   -1.44   31.99
   3   0   3    6.23   19.14
   3   0   3   15.84    5.88
   3   0   3    0.23   22.89
  -3   0  -3   16.60   19.52
  -3   0  -3    7.53   13.54
  -3   0  -3   24.94   14.65
  -3   0  -3   12.00    5.90
   3   0   4 2992.27  154.54
   3   0   4 2611.75  159.64
   3   0   4 2777.83  130.48
   3   0   4 2854.65  100.53
   3   0   4 3216.02  157.19
  -3   0  -4 2945.63  137.46
  -3   0  -4 2948.37  128.88
  -3   0  -4 2898.18  128.94
  -3   0  -4 2996.01  105.51
   3   0   5 9948.58  486.40
   3   0   510356.00  531.05
   3   0   5 9537.31  449.92
   3   0   5 9704.58  513.52
  -3   0  -5 9539.63  454.07
  -3   0  -5 9970.59  483.07
  -3   0  -510046.64  466.32
   3   0   626658.05 1545.34
   3   0   626116.87 1503.66
   3   0   627194.85 1499.01
   3   0   627912.36 1542.62
  -3   0  -629690.84 1636.70
  -3   0  -628641.20 1546.13
  -3   0  -626268.69 1434.77
   3   0   7  104.30   38.74
   3   0   7  105.73   31.61
  -3   0  -7   98.15   17.16
  -3   0  -7  110.11   23.88
   3   0   8 1210.72   93.95
   3   0   8 1155.81  118.46
  -3   0  -8 1199.94   69.90
   3   0   9  175.42   79.05
   3   0   9  188.55   39.90
  -3   0  -9  133.13   50.44
   3   0  10 1417.70  110.96
   3   0  10 1442.75   98.14
  -3   0 -10 1447.25   86.01
   3   0  11 2018.16  136.91
   3   0  11 1758.17  152.35
  -3   0 -11 1962.79  106.98
   3   0  12   35.10   35.04
   3   0  12   19.20   27.77
  -3   0 -12   38.84   22.03
   3   0  13    9.77   30.39
   3   0  13   20.87   23.65
  -3   0 -13   35.73   32.89
   3   0  14 2291.19  128.03
  -3   0 -14 2181.16  108.37
  -3   1  16   79.81    9.13
  -3   1  16   79.55   35.32
  -3  -1  16  116.88   33.35
   3   1 -15  358.59   41.78
  -3   1  15  420.57   44.19
  -3   1  15  395.20   84.38
  -3  -1  15  411.64   87.57
   3   1 -14   25.95   16.09
  -3   1  14   89.82   28.04
  -3   1  14   77.72   34.41
  -3  -1  14   91.52   32.45
   3   1 -13  910.50   53.99
  -3   1  13 1003.41   75.26
  -3   1  13 1010.23   82.17
   3  -1 -13 1214.26   73.08
  -3  -1  13  998.92   80.24
  -3   1  12  356.48   54.51
   3   1 -12  394.27   32.26
  -3   1  12  364.59   76.62
   3  -1 -12  395.75   26.05
  -3  -1  12  415.25   53.51
   3   1 -11  369.68   28.23
  -3   1  11  273.12   70.01
  -3   1  11  371.24   48.37
   3  -1 -11  266.46   21.37
  -3  -1  11  254.90   27.97
  -3  -1  11  276.71   46.64
  -3   1  10 2231.21  152.76
   3   1 -10 2258.26   97.87
  -3   1  10 2174.77  153.17
   3  -1 -10 1744.50   85.58
   3  -1 -10 1838.96   80.01
  -3  -1  10 1987.36   99.23
  -3  -1  10 1910.02  111.43
  -3  -1  10 1869.42   92.10
  -3   1   9  460.45   75.39
   3   1  -9  439.80   25.95
   3   1  -9  470.62   43.20
   3   1  -9  425.62   28.95
  -3   1   9  454.72   48.98
   3  -1  -9  460.40   25.40
   3  -1  -9  421.70   35.56
  -3  -1   9  481.49   33.60
   3  -1  -9  480.42   28.90
  -3  -1   9  489.91   39.13
  -3  -1   9  461.08   37.16
  -3  -1   9  464.64   34.60
  -3  -1   9  543.08   50.16
   3  -1  -9  492.91   42.88
  -3   1   8  363.64   23.38
   3   1  -8  363.17   43.22
   3   1  -8  372.64   37.54
   3   1  -8  374.05   25.95
   3   1  -8  355.17   21.41
  -3   1   8  391.41   44.34
  -3   1   8  341.78   22.34
  -3   1   8  320.11   65.17
   3  -1  -8  324.70   26.69
   3  -1  -8  316.62   28.66
  -3  -1   8  328.35   35.79
  -3  -1   8  331.67   27.60
   3  -1  -8  351.11   37.80
  -3  -1   8  319.57   37.63
  -3  -1   8  312.28   26.77
   3  -1  -8  305.26   40.76
  -3  -1   8  365.71   44.09
   3   1  -7 2009.15   86.25
   3   1  -7 2070.89  110.56
  -3   1   7 1972.72  138.28
   3   1  -7 2044.72  100.75
   3   1  -7 2037.56  109.86
   3   1  -7 1919.91   96.00
  -3   1   7 1930.92  103.74
  -3   1   7 2000.12   87.28
  -3   1   7 2120.54  151.43
  -3   1   7 2282.31  102.11
   3  -1  -7 2128.20   91.96
   3  -1  -7 2130.45  108.59
  -3  -1   7 2109.06  108.59
  -3  -1   7 2146.26   96.00
  -3  -1   7 2247.09  116.26
  -3  -1   7 2083.49  105.03
   3  -1  -7 2161.19  110.18
  -3  -1   7 2310.04  118.62
   3  -1  -7 2140.40  115.94
   3   1  -6 2471.96  101.43
  -3   1   6 2450.19  112.94
   3   1  -6 2889.83  138.96
   3   1  -6 2580.65  104.45
   3   1  -6 2507.03  137.73
  -3   1   6 2419.68  158.80
   3   1  -6 2548.09  108.09
  -3   1   6 2628.36  181.30
  -3   1   6 2543.99  112.17
  -3   1   6 2474.58  114.46
   3  -1  -6 2563.06  105.91
  -3  -1   6 2517.10  130.18
  -3  -1   6 2426.91  122.73
   3  -1  -6 2709.22  131.09
   3  -1  -6 2469.39  126.82
  -3  -1   6 2466.40  101.18
  -3  -1   6 2504.99  178.61
  -3  -1   6 2380.04  127.04
   3  -1  -6 2575.31  115.21
   3   1  -5 1196.50   68.43
  -3   1   5 1287.58   74.95
   3   1  -5 1264.56   77.51
   3   1  -5 1292.15   53.74
   3   1  -5 1262.84   94.41
  -3   1   5 1178.25   71.93
   3   1  -5 1192.97   83.48
  -3   1   5 1310.71   68.77
  -3   1   5 1219.90   82.71
  -3   1   5 1277.71   65.51
   3  -1  -5 1084.28   46.83
   3  -1  -5 1057.03   67.09
  -3  -1   5 1099.91   78.66
  -3  -1   5 1051.51   86.79
   3  -1  -5 1058.47   76.38
  -3  -1   5 1149.54   64.33
  -3  -1   5 1101.73   53.59
  -3  -1   5 1167.52   77.28
   3  -1  -5 1104.14   62.31
   3   1  -411973.60  535.69
   3   1  -412049.39  568.43
  -3   1   412558.87  585.11
   3   1  -412119.21  560.03
  -3   1   411833.09  565.05
   3   1  -411677.30  546.00
   3   1  -412294.04  590.08
  -3   1   412099.00  600.28
  -3   1   412099.12  612.57
   3  -1  -412460.29  608.17
   3  -1  -412121.88  571.80
  -3  -1   412599.68  589.54
   3  -1  -413033.60  602.77
  -3  -1   411891.18  603.30
  -3  -1   412636.98  558.38
   3  -1  -412337.11  525.59
  -3  -1   413913.65  705.34
  -3  -1   412828.45  626.10
   3   1  -3 2671.61  102.69
   3   1  -3 2670.11  126.37
  -3   1   3 3067.44  130.49
   3   1  -3 2700.20  101.49
  -3   1   3 2640.75  196.46
  -3   1   3 2609.39  155.50
   3   1  -3 2891.02  125.88
   3   1  -3 2703.22  169.77
  -3   1   3 2677.72  131.92
   3  -1  -3 2179.32  126.10
   3  -1  -3 2285.95  108.27
   3  -1  -3 2454.65  141.68
  -3  -1   3 2373.18  113.29
  -3  -1   3 2275.15  150.63
  -3  -1   3 2284.37   87.81
   3  -1  -3 2414.09  121.67
  -3  -1   3 2033.71  116.64
  -3  -1   3 2271.34  128.90
   3   1  -2 2183.70  110.24
  -3   1   2 2425.48  109.09
  -3   1   2 2248.79  107.32
   3   1  -2 2046.38   81.83
   3   1  -2 2254.81  115.36
   3   1  -2 2081.84  114.04
  -3   1   2 2220.32  132.15
  -3   1   2 2235.76  123.42
   3  -1  -2 2331.81  136.52
  -3  -1   2 2599.07  125.79
  -3  -1   2 2482.48  132.69
  -3  -1   2 2276.16  148.31
  -3  -1   2 2432.99   91.27
  -3  -1   2 2488.87  119.29
   3  -1  -2 2427.28  135.45
   3  -1  -2 2449.89  127.93
  -3  -1   2 2707.50  178.09
   3   1  -114660.08  751.48
   3   1  -114738.12  688.99
   3   1  -114121.87  697.70
  -3   1   114298.25  721.46
   3   1  -114283.43  650.65
  -3   1   114318.75  710.85
  -3   1   114334.23  679.10
   3   1  -114452.74  707.13
   3  -1  -114715.07  726.33
   3  -1  -114250.05  782.70
  -3  -1   113520.69  669.04
   3  -1  -114972.30  699.51
  -3  -1   114159.22  642.79
  -3  -1   114837.38  705.78
  -3  -1   112178.73  608.60
   3  -1  -113889.03  689.86
   3   1   015168.34  729.08
   3   1   014152.29  692.86
   3   1   014759.11  725.20
  -3   1   015671.17  870.58
   3   1   014813.50  688.68
  -3   1   014972.25  752.34
  -3   1   014170.25  636.92
   3   1   014558.08  783.16
  -3   1   015047.88  721.26
  -3   1   014740.45  654.57
   3  -1   015822.76  753.37
   3  -1   014784.78  741.36
  -3  -1   014902.39  732.42
   3  -1   015839.94  799.33
  -3  -1   015364.21  712.30
  -3  -1   014748.82  743.13
  -3  -1   016164.03  792.10
   3  -1   015597.12  719.83
   3   1   118939.22  954.16
  -3   1  -119990.88 1002.80
   3   1   119356.99 1053.04
   3   1   119567.74 1028.67
  -3   1  -119880.14 1096.57
   3   1   119741.54 1008.96
   3   1   120108.44 1030.61
  -3   1  -119936.80 1055.56
  -3   1  -118995.96  906.53
   3  -1   119770.90 1121.96
   3  -1   120293.45 1018.30
   3  -1   120411.90 1054.05
   3  -1   120178.05  971.46
  -3  -1  -119936.18 1008.37
  -3  -1  -120722.69 1022.76
  -3  -1  -120164.05 1087.50
  -3  -1  -119680.14 1037.39
   3   1   2 3453.52  160.00
  -3   1  -2 3460.50  133.37
   3   1   2 3322.54  170.24
   3   1   2 3483.63  150.81
  -3   1  -2 3613.13  176.55
   3   1   2 3694.36  147.08
   3   1   2 3127.76  204.95
  -3   1  -2 3728.90  199.39
   3  -1   2 2969.81  154.58
   3  -1   2 3129.35  177.53
  -3  -1  -2 3175.80  142.06
   3  -1   2 3024.37  114.23
  -3  -1  -2 3098.85  132.03
   3  -1   2 2969.89  140.26
  -3  -1  -2 2956.23  130.57
  -3  -1  -2 3138.44  129.74
  -3  -1  -2 2937.54  153.10
   3   1   3 6552.24  305.24
  -3   1  -3 6421.88  270.19
   3   1   3 5893.87  300.98
   3   1   3 6117.73  268.16
   3   1   3 6687.97  274.31
   3   1   3 6600.68  313.63
   3   1   3 6602.37  313.29
  -3   1  -3 6559.46  337.01
  -3   1  -3 6702.18  361.39
   3  -1   3 6203.97  298.03
   3  -1   3 5861.48  307.76
  -3  -1  -3 5968.67  264.19
  -3  -1  -3 5993.22  262.92
   3  -1   3 6017.57  277.85
  -3  -1  -3 6161.11  273.30
  -3  -1  -3 6083.60  255.28
   3   1   4 7220.06  377.90
   3   1   4 7648.38  357.57
  -3   1  -4 7264.14  341.21
   3   1   4 6440.62  329.44
   3   1   4 6820.79  298.32
   3   1   4 6848.64  294.76
  -3   1  -4 6959.33  301.10
   3   1   4 6452.62  314.34
   3  -1   4 6273.91  328.05
   3  -1   4 7393.20  369.32
  -3  -1  -4 6840.83  320.20
   3  -1   4 6344.86  338.57
  -3  -1  -4 6535.47  291.00
   3  -1   4 6513.20  318.54
  -3  -1  -4 6077.61  277.43
  -3  -1  -4 6814.76  284.54
  -3   1  -5 5878.92  253.75
   3   1   5 5807.51  279.98
  -3   1  -5 6203.98  269.31
   3   1   5 5887.01  299.59
   3   1   5 5432.32  231.49
  -3   1  -5 5471.44  289.89
   3   1   5 5053.39  224.74
   3   1   5 6506.21  344.13
   3   1   5 6150.86  291.48
   3  -1   5 5383.63  250.99
  -3  -1  -5 4977.84  217.00
   3  -1   5 5186.50  272.03
  -3  -1  -5 5583.86  246.57
   3  -1   5 5333.21  260.61
  -3  -1  -5 5415.24  243.73
   3  -1   5 4934.29  264.19
  -3  -1  -5 5119.91  209.44
  -3   1  -6 3345.45  150.31
   3   1   6 3368.42  172.34
  -3   1  -6 3449.05  164.28
   3   1   6 3185.52  181.11
  -3   1  -6 3428.12  151.18
   3   1   6 3246.58  165.99
   3   1   6 3218.07  165.89
   3  -1   6 3133.90  161.80
   3  -1   6 2745.73  220.47
  -3  -1  -6 3194.10  145.96
   3  -1   6 3079.13  145.80
  -3  -1  -6 2789.32  134.29
   3  -1   6 3276.60  156.65
   3   1   7  556.52   60.55
  -3   1  -7  540.68   60.55
  -3   1  -7  542.09   44.51
   3   1   7  632.16   57.64
   3  -1   7  575.78   72.47
   3  -1   7  550.28   39.63
  -3  -1  -7  596.18   69.42
   3  -1   7  546.30   60.29
   3   1   8   29.91   59.29
  -3   1  -8   49.93   31.54
   3   1   8   60.62   53.37
   3  -1   8   35.67   24.34
   3  -1   8   46.36   33.18
  -3  -1  -8   41.47   22.30
   3   1   9  519.65   68.66
   3   1   9  520.18   58.07
   3  -1   9  383.38   59.67
   3  -1   9  375.40   45.86
  -3  -1  -9  372.59   42.47
   3   1  10 1097.22   97.59
   3   1  10 1037.26   84.99
  -3   1 -10 1042.46   68.09
   3  -1  10 1029.33  138.45
   3  -1  10  942.51  100.75
  -3  -1 -10 1011.53   71.19
   3   1  11  927.52   92.07
   3   1  11  922.71  117.63
  -3   1 -11  913.55   62.66
   3  -1  11  951.26   85.70
   3  -1  11  886.99   67.90
  -3  -1 -11  880.59   94.58
   3   1  12  202.00   94.45
   3   1  12  214.30   46.22
  -3   1 -12  360.85   58.12
   3  -1  12  255.08   51.03
   3  -1  12  258.55   38.09
  -3  -1 -12  233.34   35.31
   3   1  13  729.42   76.22
   3   1  13  695.68   65.77
  -3   1 -13  720.84   51.99
   3  -1  13  727.00  106.99
   3  -1  13  656.91   76.51
  -3  -1 -13  655.62   50.12
  -3   2  16 1509.03   87.10
  -3   2  16 1448.90   90.37
  -3  -2  16 1430.24   85.13
   3   2 -15 1484.39   74.94
  -3   2  15 1527.97  134.20
  -3   2  15 1452.15  130.46
  -3  -2  15 1652.23  100.52
   3   2 -14 1225.83   85.74
  -3   2  14 1324.37   95.35
  -3   2  14 1324.97   89.21
  -3  -2  14 1207.44  122.33
   3   2 -13  538.43   58.31
  -3   2  13  762.07   71.92
  -3   2  13  702.79   62.78
  -3  -2  13  548.74   92.02
   3   2 -12 3208.06  152.54
  -3   2  12 3543.56  198.32
  -3   2  12 3122.54  169.73
  -3  -2  12 3378.08  171.18
  -3  -2  12 3354.17  179.49
   3   2 -11 1321.55   70.95
  -3   2  11 1406.48  102.97
  -3   2  11 1313.36   87.49
  -3  -2  11 1498.60   86.47
  -3  -2  11 1343.80   87.84
   3   2 -10  986.39   53.97
  -3   2  10  940.83  118.53
  -3   2  10  963.20   96.20
  -3  -2  10  977.86   65.59
  -3  -2  10  926.15   67.79
  -3   2   9  162.27   51.22
   3   2  -9  177.89   21.80
  -3   2   9  183.29   68.29
  -3   2   9  168.61   23.08
  -3  -2   9  150.39   32.51
  -3  -2   9  176.55   32.72
   3  -2  -9  136.61   19.14
  -3   2   8 3092.46  173.20
   3   2  -8 3175.10  152.26
   3   2  -8 3050.48  132.29
   3   2  -8 2766.30  130.00
   3   2  -8 2894.71  126.08
  -3   2   8 3176.50  142.94
  -3   2   8 3009.66  207.76
   3  -2  -8 3217.71  141.41
   3  -2  -8 2885.18  114.91
  -3  -2   8 3188.38  159.33
  -3  -2   8 3182.89  193.48
  -3  -2   8 3170.74  137.66
   3  -2  -8 3295.88  155.48
   3  -2  -8 3267.10  201.15
  -3  -2   8 3438.36  162.06
   3   2  -7 3890.30  213.49
  -3   2   7 3750.00  200.29
   3   2  -7 3661.48  157.10
   3   2  -7 3672.33  173.46
   3   2  -7 3709.61  152.24
  -3   2   7 3477.85  159.30
  -3   2   7 3625.57  239.75
   3  -2  -7 3994.89  175.70
   3  -2  -7 3926.49  205.26
  -3  -2   7 4123.39  199.44
  -3  -2   7 4172.66  206.52
  -3  -2   7 3941.84  166.62
   3  -2  -7 3774.88  188.07
  -3  -2   7 3984.42  186.46
   3  -2  -7 3782.44  147.92
  -3   2   6  848.01   40.56
   3   2  -6  843.19   56.68
   3   2  -6  850.75   44.02
   3   2  -6  842.90   64.03
  -3   2   6  913.44   76.57
   3   2  -6  860.15   58.25
  -3   2   6  930.72   75.75
  -3   2   6  856.22   39.06
  -3   2   6  810.41   52.76
   3  -2  -6  777.18   30.49
   3  -2  -6  806.30   52.13
  -3  -2   6  793.41   40.86
   3  -2  -6  815.08   51.26
   3  -2  -6  759.46   66.49
  -3  -2   6  834.10   60.90
  -3  -2   6  705.64   69.57
  -3  -2   6  813.97   68.22
  -3  -2   6  762.32   56.89
  -3   2   5  335.89   28.69
   3   2  -5  383.03   38.13
   3   2  -5  302.39   40.34
   3   2  -5  326.08   49.58
  -3   2   5  335.72   30.80
   3   2  -5  375.79   28.85
  -3   2   5  336.15   51.95
  -3   2   5  310.19   24.12
  -3   2   5  331.57   57.90
   3  -2  -5  185.74   15.93
  -3  -2   5  191.34   45.96
  -3  -2   5  194.21   16.70
   3  -2  -5  213.26   28.55
   3  -2  -5  186.61   46.21
  -3  -2   5  202.36   22.95
  -3  -2   5  186.44   85.70
  -3  -2   5  181.84   60.47
   3  -2  -5  214.78   56.38
  -3   2   4  952.49   86.24
  -3   2   4  881.51   49.39
  -3   2   4  899.62   81.64
   3   2  -4  875.03   46.53
   3   2  -4  861.33   86.11
   3   2  -4  919.81   61.07
  -3   2   4  836.98   70.55
   3  -2  -4  946.12   83.45
   3  -2  -4  964.72   50.25
   3  -2  -4  993.78   34.61
  -3  -2   4 1009.35   78.24
  -3  -2   4  987.03   85.89
  -3  -2   4  948.47   64.46
   3  -2  -4  903.68   77.21
   3  -2  -4  935.77   50.50
  -3  -2   4  905.72   62.63
  -3   2   3 1318.58   99.23
  -3   2   3 1309.21   61.49
   3   2  -3 1223.27   80.18
   3   2  -3 1301.89   76.72
   3   2  -3 1393.52  109.85
  -3   2   3 1313.35   97.25
  -3   2   3 1247.01   70.90
   3  -2  -3 1524.44   65.31
  -3  -2   3 1516.02   93.84
  -3  -2   3 1488.61  103.10
  -3  -2   3 1503.20   64.78
  -3  -2   3 1606.56   83.52
   3  -2  -3 1495.62  100.08
  -3  -2   3 1454.17   82.09
   3  -2  -3 1479.29  102.10
  -3   2   219354.84  979.81
   3   2  -220255.24 1006.49
   3   2  -221429.99 1090.13
   3   2  -221184.58 1078.80
  -3   2   221395.98 1130.35
  -3   2   220664.47 1062.41
  -3   2   221196.07 1088.91
   3  -2  -220792.00 1064.43
   3  -2  -220769.06 1017.79
  -3  -2   220608.52 1067.55
  -3  -2   220983.94 1038.70
  -3  -2   220796.71 1055.63
  -3  -2   222430.45 1146.99
   3  -2  -220754.82 1154.70
   3   2  -120253.29  966.39
  -3   2   120388.99  940.59
   3   2  -119835.13  963.55
  -3   2   118823.00  997.83
  -3   2   119337.46  960.97
   3   2  -119794.19 1005.68
   3   2  -121050.97 1061.11
   3   2  -118223.74  938.60
  -3   2   120351.61  996.33
  -3   2   120268.67 1097.05
   3  -2  -119758.37 1035.67
  -3  -2   119904.42 1012.82
  -3  -2   120235.29  993.55
   3  -2  -119805.73  957.87
  -3  -2   120608.28 1037.29
   3  -2  -120456.05 1047.79
  -3  -2   119486.83 1046.28
   3  -2  -120719.30  946.59
   3   2   0 6614.66  286.43
   3   2   0 6757.23  313.52
   3   2   0 6305.41  291.14
  -3   2   0 6465.31  322.22
  -3   2   0 6718.60  293.64
   3   2   0 6380.26  276.90
   3   2   0 6804.42  302.73
  -3   2   0 6663.32  319.46
  -3   2   0 6794.53  275.57
  -3   2   0 6383.21  246.07
   3  -2   0 5934.34  369.65
  -3  -2   0 6420.20  286.40
   3  -2   0 6539.59  270.02
  -3  -2   0 6072.11  289.55
  -3  -2   0 6412.47  291.19
   3  -2   0 5976.71  293.09
  -3  -2   0 6867.40  315.53
   3  -2   0 6387.76  247.98
   3   2   1 5178.54  246.98
   3   2   1 5230.51  228.81
   3   2   1 4743.34  214.74
  -3   2  -1 5206.74  256.51
  -3   2  -1 5636.99  281.01
   3   2   1 4950.06  214.21
  -3   2  -1 5207.78  211.42
   3   2   1 5649.81  260.55
   3  -2   1 5047.08  248.74
   3  -2   1 4833.49  220.25
   3  -2   1 5066.05  203.00
  -3  -2  -1 5118.67  219.36
   3  -2   1 5209.04  199.95
   3  -2   1 4776.19  250.55
  -3  -2  -1 5156.32  223.87
  -3  -2  -1 5406.96  238.00
  -3  -2  -1 5270.60  243.60
   3   2   2 3164.15  143.55
  -3   2  -2 3304.59  128.64
   3   2   2 3070.55  149.79
   3   2   2 3388.92  138.96
   3   2   2 3681.90  175.98
  -3   2  -2 3025.53  231.83
   3   2   2 3288.03  166.09
  -3   2  -2 3349.82  227.78
   3  -2   2 3101.45  108.70
   3  -2   2 3203.58  110.97
   3  -2   2 3222.27  135.75
   3  -2   2 3121.58  123.48
  -3  -2  -2 3199.23  131.68
   3  -2   2 3226.65  217.37
   3  -2   2 3065.47  231.28
  -3  -2  -2 2927.96  135.01
  -3  -2  -2 3256.24  143.39
  -3  -2  -2 3402.13  165.58
   3   2   315149.20  754.39
   3   2   315460.35  788.70
   3   2   315633.53  741.41
  -3   2  -314755.78  779.67
  -3   2  -315032.46  712.31
   3   2   315761.06  757.36
   3   2   315146.00  764.98
   3   2   314868.17  802.73
  -3   2  -315189.86  778.46
   3  -2   315187.75  726.76
   3  -2   315180.20  825.55
  -3  -2  -316446.81  776.83
  -3  -2  -315152.08  734.00
   3  -2   315928.12  791.73
  -3  -2  -315065.61  768.30
  -3  -2  -316143.94  803.57
   3   2   4 1351.85   81.91
   3   2   4 1482.40   92.87
   3   2   4 1271.05   50.68
  -3   2  -4 1387.77  102.99
  -3   2  -4 1378.25   62.18
   3   2   4 1365.14   73.17
   3   2   4 1427.78   88.16
   3   2   4 1298.28  123.03
  -3   2  -4 1369.30   90.18
   3  -2   4 1622.52   70.91
   3  -2   4 1635.24   94.39
  -3  -2  -4 1573.53   67.57
  -3  -2  -4 1636.90   79.49
   3  -2   4 1524.59   70.47
  -3  -2  -4 1595.98   80.05
  -3  -2  -4 1611.98   82.51
   3   2   5 3555.69  208.65
   3   2   5 3328.67  162.43
   3   2   5 2962.20  161.55
  -3   2  -5 3418.38  209.40
   3   2   5 3228.03  130.92
   3   2   5 3185.63  161.51
  -3   2  -5 3264.89  138.06
   3  -2   5 3012.43  132.27
   3  -2   5 3024.99  154.31
   3  -2   5 2968.03  133.97
   3  -2   5 2998.75  186.29
  -3  -2  -5 2941.25  162.06
  -3  -2  -5 2920.48  138.09
  -3  -2  -5 2983.29  123.77
  -3   2  -6 1489.27   71.83
   3   2   6 1507.38  124.01
   3   2   6 1564.83  100.54
  -3   2  -6 1480.08   90.40
   3   2   6 1542.15   90.05
   3  -2   6 1313.14   83.15
   3  -2   6 1163.63   81.62
   3  -2   6 1161.89   64.34
  -3  -2  -6 1272.99   72.39
   3  -2   6 1249.01  107.14
  -3   2  -7 2620.43  122.87
   3   2   7 2572.38  194.96
   3   2   7 2600.10  143.16
  -3   2  -7 2533.09  138.21
   3  -2   7 2780.01  131.09
  -3  -2  -7 2809.95  135.18
   3  -2   7 2881.97  183.32
  -3   2  -8   52.65   19.88
   3   2   8   66.42   36.28
   3   2   8   47.38   54.03
  -3   2  -8   37.89   42.99
   3  -2   8   28.37   19.17
  -3  -2  -8   38.38   41.80
   3  -2   8   43.24   30.29
  -3   2  -9 4377.68  208.97
   3   2   9 4541.38  250.14
   3   2   9 4301.90  232.91
  -3   2  -9 4423.12  230.08
   3  -2   9 4057.97  232.47
  -3  -2  -9 4455.61  215.96
   3  -2   9 4422.35  236.14
   3   2  10  414.30   64.39
   3   2  10  350.29   56.80
  -3   2 -10  416.98   59.49
   3  -2  10  322.93   81.39
   3  -2  10  317.08   36.67
  -3  -2 -10  311.81   41.55
   3   2  11 4263.18  302.56
   3   2  11 4161.73  277.87
  -3   2 -11 4411.86  244.70
   3  -2  11 4750.44  252.33
   3  -2  11 4334.76  218.28
  -3  -2 -11 4572.96  256.02
   3   2  12  783.91   80.19
   3   2  12  745.27   70.10
  -3   2 -12  748.91   53.39
   3  -2  12  806.78   68.48
   3  -2  12  644.20   66.95
  -3  -2 -12  690.88   55.62
   3   2  13  543.71   64.57
   3   2  13  483.49   55.67
  -3   2 -13  459.46   42.43
   3  -2  13  629.55   81.34
   3  -2  13  467.55   35.33
  -3  -2 -13  572.65   45.73
   3   3 -15   26.78   14.67
  -3   3  15   10.10   51.25
  -3   3  15   36.09   36.51
  -3  -3  15   24.61   18.54
   3   3 -14    5.15   13.24
  -3   3  14   -4.31   26.42
  -3   3  14    6.87   17.85
  -3  -3  14   -0.46   11.48
  -3  -3  14   28.74   17.25
   3   3 -13  261.86   30.21
  -3   3  13  277.89   54.85
  -3   3  13  259.11   37.40
  -3  -3  13  214.26   50.77
  -3  -3  13  226.66   36.56
   3   3 -12  117.21   41.98
  -3   3  12  119.65   30.39
  -3   3  12  112.08   47.14
  -3  -3  12  233.39   32.96
   3  -3 -12  112.60   23.08
  -3  -3  12  178.35   53.22
   3   3 -11 4042.27  220.45
  -3   3  11 4625.14  255.30
  -3   3  11 4551.02  222.99
  -3  -3  11 4261.58  222.56
  -3  -3  11 3899.51  229.21
   3   3 -10 5353.59  279.20
  -3   3  10 5748.31  309.48
  -3   3  10 5778.66  279.77
  -3   3  10 5479.97  262.63
  -3  -3  10 5745.38  307.75
  -3  -3  10 5619.22  290.23
   3   3  -9  119.11   37.34
  -3   3   9  129.15   44.91
  -3   3   9  118.09   39.01
  -3   3   9  119.33   24.75
  -3  -3   9  162.28   45.05
  -3  -3   9  191.03   38.02
   3   3  -8 1864.08  108.05
  -3   3   8 1894.72   93.70
   3   3  -8 1945.00   94.22
  -3   3   8 1861.05  119.42
  -3   3   8 1847.80  108.04
   3  -3  -8 1645.35   83.41
  -3  -3   8 1631.94  111.30
   3   3  -7  710.04   45.92
   3   3  -7  727.25   61.83
   3   3  -7  739.09   37.47
   3   3  -7  676.70   41.26
  -3   3   7  678.44   40.03
  -3   3   7  677.93   70.58
  -3   3   7  725.80   72.32
   3  -3  -7  703.48   71.72
   3  -3  -7  659.02   61.95
  -3  -3   7  760.90  103.79
  -3  -3   7  716.45   59.36
   3  -3  -7  681.03   41.26
  -3  -3   7  657.37   68.71
  -3   3   6 3984.98  174.88
   3   3  -6 4170.75  188.84
   3   3  -6 4027.84  177.62
   3   3  -6 4285.61  187.10
   3   3  -6 4321.74  181.93
  -3   3   6 4111.37  219.92
  -3   3   6 4161.44  189.29
   3  -3  -6 4795.28  213.27
   3  -3  -6 4956.43  276.39
   3  -3  -6 4393.52  169.66
  -3  -3   6 4836.96  242.81
  -3  -3   6 5065.53  210.05
   3  -3  -6 4713.84  217.86
  -3  -3   6 4616.09  208.85
  -3   3   5  960.45   46.19
  -3   3   5  946.61   82.95
   3   3  -5 1004.43   52.63
   3   3  -5 1006.16   53.62
  -3   3   5  911.60   43.29
  -3   3   5  959.02   48.63
   3   3  -5  959.12   55.19
  -3   3   5 1010.44   59.77
   3  -3  -5  975.75   34.01
   3  -3  -5  971.41   58.83
   3  -3  -5 1014.12   60.74
  -3  -3   5 1076.55   53.13
  -3  -3   5  984.12   79.94
   3  -3  -5 1059.39   80.34
  -3  -3   5  933.41   56.40
   3   3  -4  313.91   30.60
  -3   3   4  306.67   34.94
  -3   3   4  295.63   31.34
  -3   3   4  328.39   96.22
   3   3  -4  343.55   35.17
   3   3  -4  338.71   32.89
  -3   3   4  344.31   37.09
   3  -3  -4  380.31   18.17
   3  -3  -4  360.93   53.67
   3  -3  -4  343.93   21.67
   3  -3  -4  368.29   37.02
  -3  -3   4  356.02   49.60
  -3  -3   4  378.97   31.06
  -3  -3   4  388.80   35.15
   3  -3  -4  365.96   24.50
   3  -3  -4  379.44   17.31
  -3  -3   4  329.10   35.03
  -3   3   3 9495.00  479.59
  -3   3   3 9771.51  443.66
  -3   3   3 9417.81  404.30
   3   3  -3 9488.67  458.15
   3   3  -3 9418.07  469.57
   3   3  -3 9344.67  430.16
  -3   3   3 9491.49  432.29
   3  -3  -3 9361.70  468.35
   3  -3  -3 9277.03  421.21
   3  -3  -3 9450.69  404.48
   3  -3  -3 9963.07  408.99
  -3  -3   3 9473.05  458.32
  -3  -3   3 9603.17  458.13
  -3  -3   3 9822.84  455.27
   3  -3  -3 9220.22  417.22
   3  -3  -3 9378.92  381.64
  -3  -3   310409.82  474.82
  -3   3   2  671.50   25.58
  -3   3   2  677.60   39.74
  -3   3   2  633.13   67.52
   3   3  -2  614.13   41.27
   3   3  -2  636.33   48.52
   3   3  -2  671.40   43.84
  -3   3   2  617.39   44.77
  -3   3   2  638.30   24.38
   3  -3  -2  413.03   26.83
   3  -3  -2  411.90   60.47
   3  -3  -2  444.07   19.22
  -3  -3   2  426.62   46.98
  -3  -3   2  438.12   37.12
   3  -3  -2  404.43   23.70
   3  -3  -2  506.32   59.82
  -3  -3   2  391.91   39.50
  -3  -3   2  491.41   47.40
  -3   3   1 2134.30   76.72
  -3   3   1 2226.06   89.41
  -3   3   1 2113.46  125.12
   3   3  -1 2023.71  119.10
   3   3  -1 2121.45  102.75
   3   3  -1 2114.10  125.24
  -3   3   1 2089.41  106.32
  -3   3   1 2242.76   79.10
   3  -3  -1 1578.40   64.10
   3  -3  -1 1537.81  107.06
   3  -3  -1 1731.05   57.57
  -3  -3   1 1655.24  115.63
  -3  -3   1 1608.03  106.90
   3  -3  -1 1663.14   60.05
   3  -3  -1 1644.84   91.36
  -3  -3   1 1555.10   84.17
  -3  -3   1 1704.98   95.41
   3   3   0 3001.20  110.19
  -3   3   0 2908.25  190.97
   3   3   0 2974.38  122.96
  -3   3   0 2942.17  104.55
  -3   3   0 3097.27  132.15
   3   3   0 2938.10  129.19
   3   3   0 2994.84  138.49
   3   3   0 2649.12  127.85
  -3   3   0 2820.72  156.32
   3  -3   0 2588.87  135.33
   3  -3   0 2460.17  143.90
   3  -3   0 2530.66   89.60
  -3  -3   0 2485.41  111.62
   3  -3   0 2470.52  107.53
  -3  -3   0 2575.49  117.56
   3  -3   0 2625.57   95.30
  -3  -3   0 2586.65  129.30
   3  -3   0 2722.14  100.93
  -3  -3   0 2443.31  152.01
   3   3   1 3630.40  148.02
  -3   3  -1 3510.06  144.37
   3   3   1 3557.93  148.82
   3   3   1 3502.10  190.17
  -3   3  -1 3648.55  135.63
   3   3   1 3392.73  181.70
  -3   3  -1 3589.90  183.47
  -3   3  -1 3466.78  185.69
   3   3   1 3507.83  197.54
   3  -3   1 3224.76  213.74
   3  -3   1 3243.98  126.27
   3  -3   1 3287.81  128.62
  -3  -3  -1 3350.71  154.63
   3  -3   1 3220.09  122.17
   3  -3   1 3270.34  229.66
  -3  -3  -1 3489.83  184.50
  -3  -3  -1 3401.00  193.75
   3  -3   1 3365.76  124.47
  -3  -3  -1 3150.19  150.45
   3   3   2 1420.65   93.59
   3   3   2 1355.56   94.24
  -3   3  -2 1413.80   59.04
   3   3   2 1568.12   81.03
  -3   3  -2 1752.74  110.08
   3   3   2 1471.07   77.48
   3   3   2 1405.63   83.91
  -3   3  -2 1485.11  101.49
   3  -3   2 1897.54   70.34
   3  -3   2 1750.89   57.00
   3  -3   2 1839.79  107.29
   3  -3   2 1871.01   75.91
   3  -3   2 1753.55   55.14
  -3  -3  -2 1884.39   80.22
   3  -3   2 1815.43   67.06
  -3  -3  -2 1973.66   92.28
  -3  -3  -2 1952.37  121.74
   3   3   3  538.95   62.59
   3   3   3  585.58   67.17
  -3   3  -3  530.19   62.46
  -3   3  -3  540.06   60.11
   3   3   3  565.46   58.25
   3   3   3  538.84   46.92
   3   3   3  512.00   46.99
  -3   3  -3  536.27   28.98
   3  -3   3  505.30   24.99
   3  -3   3  542.59   56.74
   3  -3   3  589.59   40.23
  -3  -3  -3  546.44   43.19
  -3  -3  -3  548.56   59.79
   3   3   4 1293.57   74.22
   3   3   4 1262.03  103.37
  -3   3  -4 1346.95   93.29
  -3   3  -4 1351.58  130.33
   3   3   4 1332.02   63.62
   3   3   4 1303.07   76.48
   3   3   4 1226.52   76.78
  -3   3  -4 1324.46   72.97
   3  -3   4 1391.82   65.96
   3  -3   4 1377.29   61.41
  -3  -3  -4 1379.58   71.88
   3  -3   4 1442.60   91.43
  -3  -3  -4 1420.90   75.07
  -3  -3  -4 1430.01   85.81
   3   3   5  656.74   79.67
   3   3   5  650.22   53.42
   3   3   5  587.55   81.55
  -3   3  -5  696.74   67.37
   3   3   5  666.23   36.70
   3   3   5  664.38   82.45
  -3   3  -5  631.65   49.79
   3  -3   5  718.20   40.30
   3  -3   5  755.02   57.14
   3  -3   5  637.62   33.15
   3  -3   5  692.67   62.85
  -3  -3  -5  710.16   48.42
  -3  -3  -5  709.21   50.04
   3   3   6  512.62   53.23
   3   3   6  514.68   50.22
  -3   3  -6  504.07   59.04
   3  -3   6  597.96   51.38
   3  -3   6  511.75   30.01
  -3  -3  -6  546.59   68.25
  -3   3  -7 1386.09   97.24
   3   3   7 1374.03   93.41
   3   3   7 1367.28   88.65
  -3   3  -7 1699.98  101.17
   3  -3   7 1288.62   84.11
  -3  -3  -7 1210.85   78.67
  -3   3  -810308.13  553.71
   3   3   810119.41  537.61
   3   3   810268.48  574.76
  -3   3  -810365.10  540.08
   3  -3   810718.96  551.04
  -3  -3  -810793.57  537.64
  -3   3  -9  549.78   61.84
   3   3   9  570.04  107.00
   3   3   9  590.70   62.07
  -3   3  -9  584.47   46.89
   3  -3   9  684.50   60.98
  -3  -3  -9  660.12   89.32
  -3   3 -10 1094.44  108.03
   3   3  10 1075.39  140.94
   3   3  10 1026.92   82.55
  -3   3 -10 1074.96   67.39
   3  -3  10 1232.96  111.83
  -3  -3 -10 1173.85   75.46
  -3   3 -11 1879.82  112.76
   3   3  11 1970.34  132.92
   3   3  11 2032.40  161.87
  -3   3 -11 1882.51  101.21
   3  -3  11 1835.55  111.72
  -3  -3 -11 1811.43  102.96
   3   3  12  290.03   54.43
   3   3  12  231.15   44.27
  -3   3 -12  237.93   33.74
   3  -3  12  336.42   39.38
  -3  -3 -12  300.07   61.95
   3   3  13  214.90   77.57
  -3   3 -13  213.27   46.32
   3   3  13  200.98   39.30
  -3  -3 -13  307.54   33.72
   3  -3  13  222.54   21.97
   3   4 -15  454.97   54.06
  -3   4  15  501.87   61.46
   3   4 -14   58.03   20.21
  -3   4  14   58.59   66.34
  -3   4  14   44.06   29.91
  -3  -4  14   44.89   21.69
  -3  -4  14   42.58   24.22
   3   4 -13 1771.89   91.90
  -3   4  13 1726.34  126.49
  -3   4  13 1650.56   87.43
  -3  -4  13 1748.40  102.63
  -3  -4  13 1516.45   84.57
   3   4 -12 2817.17  136.92
  -3   4  12 2757.59  172.62
  -3   4  12 2445.77  124.21
  -3  -4  12 2717.37  152.10
  -3  -4  12 2495.13  128.40
   3   4 -11  263.94   32.15
  -3   4  11  241.50   56.79
  -3   4  11  195.56   28.93
  -3   4  11  212.27   27.10
  -3  -4  11  222.14   46.80
  -3  -4  11  218.79   28.53
   3   4 -10 1725.30   91.00
  -3   4  10 1725.26  127.30
  -3   4  10 1736.84   92.23
  -3   4  10 1655.58   83.63
  -3  -4  10 1473.01  107.08
  -3  -4  10 1445.95   81.84
   3   4  -9 1008.98   60.33
  -3   4   9 1020.09   94.53
  -3   4   9 1020.32   65.24
  -3   4   9  974.48   52.77
  -3  -4   9  953.44   82.67
  -3  -4   9 1002.04   58.85
   3   4  -8 4762.73  214.83
  -3   4   8 4894.91  261.14
  -3   4   8 4850.20  253.60
  -3   4   8 4375.47  195.38
  -3  -4   8 4072.15  195.00
   3   4  -7 4353.57  193.61
   3   4  -7 4131.18  175.71
   3   4  -7 4006.49  173.30
   3   4  -7 4423.04  195.89
  -3   4   7 4441.48  236.37
  -3   4   7 4154.51  193.52
  -3   4   7 4223.55  180.08
  -3  -4   7 4366.83  197.23
  -3   4   6  669.54   70.35
   3   4  -6  667.81   43.49
   3   4  -6  693.75   36.32
  -3   4   6  700.78   48.16
   3   4  -6  686.42   35.99
   3   4  -6  685.32   51.77
   3  -4  -6  699.43   64.34
  -3  -4   6  650.43   96.86
  -3  -4   6  683.81   42.85
   3  -4  -6  656.58   50.50
  -3  -4   6  683.16   40.58
   3   4  -5 1824.26   85.42
   3   4  -5 1799.72   79.22
   3   4  -5 1809.55   79.19
  -3   4   5 2126.26  168.29
  -3   4   5 1629.84   83.77
   3  -4  -5 1661.60  104.57
   3  -4  -5 1697.97   89.10
  -3  -4   5 1743.32  103.80
  -3  -4   5 1722.94   79.15
  -3  -4   5 1926.98  102.00
  -3   4   4   22.19   30.67
   3   4  -4   19.66   30.58
   3   4  -4   29.24   15.54
   3   4  -4   19.49   20.79
  -3   4   4   36.46    8.30
  -3   4   4   29.49   18.25
   3  -4  -4   21.21    7.97
   3  -4  -4   26.31   29.73
   3  -4  -4   32.24   27.75
  -3  -4   4  101.22   26.21
  -3  -4   4   15.79   16.81
  -3  -4   4   37.40   16.42
  -3  -4   4   18.51   13.23
  -3   4   3  537.22   37.47
  -3   4   3  541.95   60.69
  -3   4   3  533.15   20.21
   3   4  -3  582.73   41.87
   3   4  -3  630.18   42.61
   3   4  -3  586.13   33.24
  -3   4   3  533.77   30.81
   3  -4  -3  475.18   21.98
   3  -4  -3  483.23   27.05
  -3  -4   3  506.87   47.91
  -3  -4   3  473.68   37.74
   3  -4  -3  478.77   45.42
  -3  -4   3  503.35   60.78
   3  -4  -3  500.42   88.07
  -3  -4   3  472.56   31.34
  -3   4   211587.44  532.50
  -3   4   211733.64  635.15
  -3   4   211668.28  510.01
   3   4  -211462.68  532.82
   3   4  -211451.39  540.07
   3   4  -211243.42  539.50
  -3   4   211446.12  537.75
   3  -4  -211043.90  473.05
   3  -4  -210781.33  528.85
  -3  -4   211418.67  544.65
  -3  -4   210925.86  511.42
   3  -4  -210414.09  481.59
  -3  -4   211066.73  528.97
   3  -4  -210660.42  534.44
  -3  -4   210599.64  496.88
  -3   4   111892.43  542.53
  -3   4   111796.36  591.20
  -3   4   111791.81  521.62
   3   4  -111096.20  522.07
   3   4  -111983.18  602.18
   3   4  -110292.89  486.46
  -3   4   111920.84  570.85
   3  -4  -111418.17  492.72
   3  -4  -111399.31  544.82
  -3  -4   111434.63  538.74
  -3  -4   111532.51  539.38
   3  -4  -110935.64  501.38
  -3  -4   111630.54  557.99
   3  -4  -111535.36  572.92
  -3  -4   111436.14  536.60
  -3   4   0 1541.76   61.99
  -3   4   0 1557.80   96.81
  -3   4   0 1503.22   56.08
   3   4   0 1598.38   80.39
   3   4   0 1557.58   82.83
   3   4   0 1453.62   89.51
  -3   4   0 1545.93   88.14
   3  -4   0 1553.23   54.54
   3  -4   0 1525.63   84.69
  -3  -4   0 1512.25   66.36
  -3  -4   0 1490.26   76.27
   3  -4   0 1449.94   58.65
  -3  -4   0 1547.22   85.61
   3  -4   0 1486.69   88.81
  -3  -4   0 1426.94   68.36
   3   4   1  968.82   40.65
   3   4   1 1062.81   64.45
   3   4   1  952.77   41.80
  -3   4  -1 1045.30   75.75
  -3   4  -1 1100.60   42.79
   3   4   1  938.12   83.11
  -3   4  -1 1020.47   45.36
   3   4   1 1037.23   55.49
  -3   4  -1 1041.91   72.50
   3  -4   1 1176.06   47.50
   3  -4   1 1074.50   47.47
  -3  -4  -1 1056.98   51.34
  -3  -4  -1 1115.40   60.81
   3  -4   1 1129.28   70.22
  -3  -4  -1 1108.58   96.51
   3  -4   1 1131.67  105.53
  -3  -4  -1 1113.98   56.48
   3   4   2 1026.45   59.26
   3   4   2  998.12   54.28
   3   4   2  960.07   58.44
  -3   4  -2 1046.17   73.75
  -3   4  -2 1036.13  109.95
   3   4   2 1149.03   62.93
   3   4   2 1059.44   60.95
   3   4   2 1023.75   74.65
  -3   4  -2 1066.83   43.29
   3  -4   2  876.21   58.94
   3  -4   2  843.74   35.67
  -3  -4  -2  783.82   52.66
   3  -4   2  828.36   67.31
  -3  -4  -2  848.81   85.42
   3   4   3 1516.06   87.62
   3   4   3 1410.97   87.42
  -3   4  -3 1411.17   91.68
  -3   4  -3 1530.68  141.94
   3   4   3 1470.82   77.78
   3   4   3 1438.62   96.16
   3   4   3 1417.98   72.72
   3   4   3 1536.30   76.41
  -3   4  -3 1327.12   68.30
   3  -4   3 1423.99   93.26
   3  -4   3 1395.01   57.87
  -3  -4  -3 1348.92   97.58
  -3  -4  -3 1418.52  100.49
   3   4   4 2001.22  115.31
   3   4   4 1834.39  112.30
   3   4   4 1936.70   95.17
   3   4   4 1917.79   92.47
   3   4   4 1839.12  114.29
  -3   4  -4 1946.83  112.35
  -3   4  -4 1937.55  121.04
  -3   4  -4 1717.88   75.09
   3  -4   4 1502.21   80.59
  -3  -4  -4 1423.92   79.45
  -3  -4  -4 1501.44  104.82
  -3   4  -5   30.65   12.31
   3   4   5   22.36   31.79
   3   4   5   17.92   14.75
   3   4   5   14.28   19.33
  -3   4  -5   23.42   33.06
  -3  -4  -5   54.79   20.96
   3  -4   5   25.53   20.98
  -3   4  -6 1211.71   96.53
   3   4   6 1161.76   97.72
   3   4   6 1128.68   71.09
  -3   4  -6 1050.16   56.38
   3  -4   6 1153.23   71.48
  -3  -4  -6 1103.51  104.31
  -3   4  -7 9874.68  484.61
   3   4   710191.67  565.59
   3   4   7 9223.48  463.32
   3   4   710086.87  546.95
  -3   4  -710969.17  647.04
  -3  -4  -711005.48  539.38
   3  -4   710952.76  546.72
  -3   4  -8 2480.75  159.43
   3   4   8 2381.19  138.86
   3   4   8 2322.03  129.20
  -3   4  -8 2383.09  118.86
   3  -4   8 2408.57  131.25
  -3  -4  -8 2289.05  127.76
  -3   4  -9 1468.99  110.55
   3   4   9 1472.38  102.13
   3   4   9 1478.21   92.91
  -3   4  -9 1383.33   78.29
   3  -4   9 1441.85   87.96
  -3  -4  -9 1438.67  122.85
  -3   4 -10 1105.92  122.37
   3   4  10 1115.95   88.08
   3   4  10 1091.52   76.60
  -3   4 -10  929.51   61.66
   3  -4  10 1199.24  101.36
  -3  -4 -10 1199.48   74.44
  -3   4 -11  351.02   50.32
   3   4  11  360.21   54.13
   3   4  11  350.12   69.49
  -3   4 -11  350.17   52.95
   3  -4  11  292.40   34.70
  -3  -4 -11  309.94   39.34
   3   4  12 1931.33  161.61
   3   4  12 1814.97  101.59
  -3   4 -12 1848.86   90.82
   3  -4  12 1663.30  101.95
  -3  -4 -12 2098.15  135.04
   3   5 -14  517.51   42.97
  -3   5  14  496.92   67.91
  -3  -5  14  515.31   47.10
   3   5 -13  746.87   76.01
  -3   5  13  705.84   78.61
   3  -5 -13  538.66   43.78
  -3  -5  13  873.03   97.25
   3   5 -12  967.22   63.18
  -3   5  12  915.00  144.42
  -3  -5  12  958.81   80.01
   3   5 -11  614.98   49.97
  -3   5  11  616.23  120.61
  -3   5  11  594.92   48.87
  -3  -5  11  543.01   68.72
   3   5 -10  453.26   43.74
  -3   5  10  439.79  114.95
  -3   5  10  446.35   46.25
  -3  -5  10  601.13   66.30
   3   5  -9 2688.59  132.91
  -3   5   9 2774.07  232.88
  -3   5   9 2591.51  137.29
  -3  -5   9 2569.39  157.44
   3   5  -8 2014.25  103.56
  -3   5   8 1975.70  184.71
  -3   5   8 1877.15  137.87
  -3  -5   8 2133.32  131.73
   3   5  -7  123.92   25.53
  -3   5   7  139.38   72.06
  -3   5   7  124.05   28.23
  -3  -5   7    7.44   37.26
   3   5  -6 4688.69  238.95
   3   5  -6 4521.55  195.94
   3   5  -6 4565.29  198.13
  -3   5   6 4723.92  295.01
  -3   5   6 4688.63  218.33
   3   5  -5 1398.35   73.97
   3   5  -5 1355.28   75.76
  -3   5   5 1421.03   96.73
  -3   5   5 1400.61   74.33
  -3  -5   5 1183.13   81.54
  -3  -5   5 1265.16   62.44
   3   5  -4   17.59   16.68
   3   5  -4   18.06   12.14
  -3   5   4   34.01   24.82
  -3   5   4   16.07   15.51
   3  -5  -4   -3.78   22.78
   3  -5  -4   10.23   15.16
  -3  -5   4    0.65   15.65
  -3  -5   4   10.81   13.23
  -3  -5   4    6.59   20.51
   3   5  -3 6617.60  303.02
   3   5  -3 6354.40  289.98
  -3   5   3 6356.14  321.32
  -3   5   3 6622.67  299.21
   3  -5  -3 6964.56  336.83
   3  -5  -3 6963.89  309.97
  -3  -5   3 7278.88  324.41
  -3  -5   3 7383.77  361.20
  -3  -5   3 7430.16  344.47
  -3  -5   3 6557.64  293.11
  -3   5   2 1917.06  110.34
   3   5  -2 1838.67  115.91
   3   5  -2 1851.27   89.57
   3   5  -2 1933.44   76.23
  -3   5   2 1921.08   99.47
  -3   5   2 1930.88   84.45
   3  -5  -2 1643.79   83.83
   3  -5  -2 1641.80   71.51
   3  -5  -2 1787.87  134.04
  -3  -5   2 1714.55   84.03
  -3  -5   2 1787.88  114.01
  -3  -5   2 1762.70   91.10
  -3  -5   2 1715.09   82.00
   3   5  -1 1609.39   85.16
  -3   5   1 1690.69  105.51
   3   5  -1 1636.28   84.79
   3   5  -1 1585.85   75.50
  -3   5   1 1644.64   98.80
  -3   5   1 1616.05   70.33
   3  -5  -1 1991.12  100.66
  -3  -5   1 1987.80   99.99
  -3  -5   1 1957.29   92.57
  -3  -5   1 1951.53   98.57
   3  -5  -1 1954.52   87.27
  -3  -5   1 1866.36   76.42
   3   5   0  476.44   26.14
  -3   5   0  477.65   73.95
  -3   5   0  497.33   64.50
   3   5   0  473.90   40.03
  -3   5   0  453.37   21.25
   3   5   0  492.37   41.73
  -3   5   0  464.96   23.75
   3  -5   0  448.37   36.83
   3  -5   0  444.42   18.39
  -3  -5   0  441.12   38.67
   3  -5   0  426.55   22.55
  -3  -5   0  465.76   44.90
   3  -5   0  457.96   39.34
  -3   5  -1 3099.16  158.60
  -3   5  -1 3292.01  165.11
   3   5   1 3098.41  172.73
   3   5   1 3179.68  150.94
   3   5   1 3068.30  130.41
   3   5   1 3041.79  142.19
  -3   5  -1 3072.90  122.12
   3  -5   1 3455.78  136.73
  -3  -5  -1 3382.20  180.02
   3  -5   1 3404.93  187.91
  -3  -5  -1 3477.91  197.01
  -3   5  -2 1005.62   74.21
   3   5   2  899.74   58.81
   3   5   2  908.42   86.68
   3   5   2  950.91   47.59
   3   5   2  997.67   49.01
  -3   5  -2  931.65   66.60
  -3   5  -2  903.79   47.45
   3  -5   2 1032.29   41.16
  -3   5  -3 5202.17  270.25
   3   5   3 4800.55  228.26
   3   5   3 5316.50  246.61
   3   5   3 5342.42  252.34
   3   5   3 5455.18  244.75
  -3   5  -3 5025.98  253.69
  -3   5  -3 5050.95  216.58
   3  -5   3 5283.66  222.64
   3   5   4 2658.04  127.53
   3   5   4 2635.47  120.79
  -3   5  -4 2524.87  138.52
  -3   5  -4 2773.88  162.76
  -3   5  -4 2613.45  112.05
  -3  -5  -4 2500.69  125.52
  -3   5  -5 9293.85  436.99
   3   5   5 9048.16  441.48
   3   5   510458.35  528.04
   3   5   5 9178.49  448.76
  -3   5  -5 9194.15  494.89
  -3  -5  -5 9513.98  461.14
   3  -5   5 9018.59  449.95
  -3   5  -6  723.37  135.81
   3   5   6  707.61   52.02
   3   5   6  704.08   66.82
  -3   5  -6  729.72   42.98
   3  -5   6  660.21   48.26
  -3  -5  -6  627.84   55.55
  -3   5  -7 1593.44   79.89
   3   5   7 1562.31   92.12
   3   5   7 1334.10   74.57
   3   5   7 1450.63   80.77
  -3   5  -7 1544.70  124.42
  -3  -5  -7 1361.44   88.98
   3  -5   7 1422.53   98.39
  -3   5  -8 2305.84  157.49
   3   5   8 2262.37  126.19
   3   5   8 2195.17  115.56
  -3   5  -8 2350.39  112.36
   3  -5   8 2084.10  109.90
  -3  -5  -8 2203.28  123.76
   3   5   9 1465.42   91.66
   3   5   9 1546.46   86.35
  -3   5  -9 1498.21  116.50
  -3   5  -9 1525.29   77.96
  -3  -5  -9 1342.12   89.98
   3   5  10  311.27   66.58
   3   5  10  289.81   50.63
  -3   5 -10  267.58  100.28
  -3   5 -10  299.53   28.99
  -3  -5 -10  234.81   36.84
   3   5  11  340.97   42.70
   3   5  11  311.20   33.37
  -3   5 -11  352.51   54.29
  -3   5 -11  334.03   29.65
  -3  -5 -11  321.64   37.30
   3   5  12  434.11   42.04
  -3   5 -12  420.60   29.93
   3   5  12  366.00   42.88
  -3  -5 -12  389.22   58.35
   3  -5  12  355.71   27.43
   3   6 -13  517.98   42.57
  -3   6  13  498.87   64.65
   3  -6 -13  346.78   36.80
  -3  -6  13  454.39   85.09
   3   6 -12  168.29   31.47
  -3   6  12  158.10   49.66
   3  -6 -12  110.83   34.13
  -3  -6  12  227.87   44.55
   3   6 -11  280.33   39.09
  -3   6  11  282.92   58.57
  -3   6  11  261.69   38.87
  -3  -6  11  251.59   52.03
   3   6 -10    9.36   17.42
  -3   6  10    3.36   26.86
  -3   6  10   -2.32   18.04
  -3  -6  10    2.90   25.55
   3   6  -9 2056.92  110.31
  -3   6   9 1991.65  135.64
  -3   6   9 1884.17  111.25
  -3  -6   9 1539.72  117.51
   3   6  -8  806.79   61.47
  -3   6   8  797.17   83.13
  -3   6   8  783.79   96.78
  -3  -6   8  926.81   82.78
   3   6  -7 2538.75  128.71
  -3   6   7 2529.21  152.77
  -3   6   7 2377.65  127.49
  -3  -6   7 2190.16  137.95
   3   6  -6 2051.95  108.29
  -3   6   6 2092.31  131.19
  -3   6   6 2147.54  112.59
  -3  -6   6 2111.73  124.05
   3   6  -5 1071.59   67.76
   3   6  -5 1036.59   50.94
  -3   6   5 1111.04   82.32
  -3   6   5 1062.87   65.67
  -3  -6   5  807.31   67.46
   3   6  -4  313.00   37.60
   3   6  -4  287.84   26.02
  -3   6   4  300.39   75.57
  -3   6   4  304.00   31.98
  -3  -6   4  378.09   39.11
   3   6  -3   36.80   40.53
   3   6  -3   36.34   18.35
  -3   6   3   44.16   28.64
  -3   6   3   39.35   18.20
  -3  -6   3  120.77   21.78
   3   6  -2 1129.62   68.80
   3   6  -2 1146.71   64.17
  -3   6   2 1157.28   76.75
  -3   6   2 1102.67   54.99
  -3  -6   2  895.47   51.19
  -3   6   1 2426.57  128.24
   3   6  -1 2402.40  119.68
   3   6  -1 2490.37  148.13
  -3   6   1 2361.74  110.44
  -3   6   1 2383.77  101.59
   3  -6  -1 2402.71  107.01
   3   6   0 4377.94  204.25
   3   6   0 4406.71  236.20
  -3   6   0 4258.72  212.62
  -3   6   0 4396.37  211.64
   3   6   1 1478.92   84.45
   3   6   1 1577.22   88.27
  -3   6  -1 1596.70   91.91
  -3   6  -1 1604.14   91.25
   3   6   2 2709.77  135.80
   3   6   2 2910.74  145.56
  -3   6  -2 2885.19  174.04
  -3   6  -2 2856.26  155.26
   3   6   3  355.32   41.27
   3   6   3  330.73   42.46
  -3   6  -3  320.03   37.62
  -3   6  -3  343.16   85.30
  -3   6  -3  303.16   21.49
   3   6   4 3702.02  209.07
  -3   6  -4 3015.18  233.35
  -3   6  -4 2604.92  129.73
  -3  -6  -4 3023.00  151.13
  -3   6  -5  626.58   80.53
  -3   6  -5  553.67   44.53
  -3  -6  -5  517.09   50.47
  -3   6  -6 3074.43  195.52
  -3   6  -6 2778.30  128.40
  -3  -6  -6 3111.70  156.05
   3   6   7  628.00   45.50
  -3   6  -7  715.79   89.32
  -3   6  -7  661.11   40.38
  -3  -6  -7  659.77   59.15
   3   6   8  265.42   25.73
  -3   6  -8  326.46   66.29
  -3   6  -8  307.77   27.67
  -3  -6  -8  285.32   43.10
   3   6   9  161.42   27.72
  -3   6  -9  227.51  104.49
  -3   6  -9  194.19   23.14
  -3  -6  -9  263.49   59.68
   3   6  10  694.48   48.28
  -3   6 -10  766.74   85.35
  -3   6 -10  692.52   57.29
  -3  -6 -10  643.77   49.95
  -3   6 -11 1057.34   88.82
  -3   6 -11  942.23   48.22
  -3  -6 -11 1141.40   64.49
   3   7 -12  183.62   30.34
   3  -7 -12   99.01   32.28
  -3  -7  12  167.55   70.55
   3   7 -11  607.73   51.69
  -3   7  11  574.07   67.60
  -3   7  11  568.87   55.02
  -3  -7  11  643.45   68.87
   3   7 -10 1137.06   73.26
  -3   7  10 1117.27   92.69
  -3   7  10 1098.27   80.79
  -3  -7  10 1196.19   93.45
   3   7  -9  305.24   40.93
  -3   7   9  279.80   53.25
  -3   7   9  273.23   47.36
  -3  -7   9  275.63   53.11
   3   7  -8 1347.47   83.54
  -3   7   8 1325.20  100.20
  -3   7   8 1236.89  122.63
  -3  -7   8 1218.18   92.46
   3   7  -7  239.61   37.99
  -3   7   7  235.19   46.04
  -3   7   7  253.04   66.84
  -3  -7   7  233.18   46.13
   3   7  -6 1000.49   68.77
  -3   7   6  965.34  113.45
  -3   7   6  957.66   66.91
  -3  -7   6  953.34   73.25
   3   7  -5 2763.50  179.24
  -3   7   5 4626.00  252.98
  -3   7   5 2626.79  135.35
  -3  -7   5 2666.18  142.05
   3   7  -4 3738.82  221.68
   3   7  -4 3886.85  177.32
  -3   7   4 3918.73  205.02
  -3   7   4 3800.25  182.32
  -3  -7   4 3862.59  191.90
   3   7  -3  321.34   42.82
   3   7  -3  303.27   29.77
  -3   7   3  305.58   42.62
  -3   7   3  288.57   30.28
  -3  -7   3  286.82   28.90
   3   7  -2 1049.07   72.06
   3   7  -2 1047.14   62.28
  -3   7   2 1048.57   71.95
  -3   7   2 1003.32   54.83
   3   7  -1 1117.88   74.32
   3   7  -1 1133.25   69.17
  -3   7   1 1138.15   73.40
  -3   7   1 1061.00   51.13
   3   7   0 1689.51  132.91
   3   7   0 1839.13  100.62
  -3   7   0 1803.37   99.70
   3   7   1 5738.79  279.93
   3   7   1 5794.29  283.11
  -3   7  -1 5944.85  302.66
   3   7   2 5318.65  264.15
   3   7   2 5927.09  289.40
  -3   7  -2 5832.16  301.35
   3   7   3 1521.58  127.67
  -3   7  -3 1379.52  100.64
  -3   7  -4  108.51   47.25
  -3  -7  -4  169.87   33.51
  -3   7  -5 1205.75  101.20
  -3  -7  -5 1085.14   72.33
  -3   7  -6  499.86   69.44
  -3   7  -6  337.78   25.49
  -3  -7  -6  503.40   74.43
   3   7   7  577.66   58.20
  -3   7  -7  325.45  105.59
  -3   7  -7  260.74   23.69
  -3  -7  -7  336.33   42.84
  -3   7  -8  331.66  114.00
  -3   7  -8  250.79   22.04
  -3  -7  -8  266.66   39.15
   3   7   9  450.58   46.11
  -3   7  -9  553.76   78.47
  -3   7  -9  430.39   28.20
  -3  -7  -9  464.12   67.17
  -3   7 -10  688.42   82.69
  -3  -7 -10  857.02   51.80
   3   8 -11  422.25   41.78
  -3   8  11  424.53   45.38
   3  -8 -11  294.74   47.73
  -3  -8  11  404.74   82.42
   3   8 -10  159.63   55.08
  -3   8  10  164.70   37.02
  -3   8  10  136.37   38.45
  -3  -8  10  171.37   67.18
   3   8  -9 1614.68  127.02
  -3   8   9 1584.92   99.50
  -3   8   9 1565.52  103.19
  -3  -8   9 1667.22  104.63
   3   8  -8  280.28   64.61
  -3   8   8  295.98   44.27
  -3   8   8  261.78   47.30
  -3  -8   8  248.96   44.36
   3   8  -7 2935.54  184.33
  -3   8   7 3219.11  172.97
  -3   8   7 2799.70  159.85
  -3  -8   7 3003.18  159.42
   3   8  -6 1798.64  102.10
  -3   8   6 1810.44  108.88
  -3   8   6 1662.25  134.64
  -3  -8   6 1674.09   99.58
   3   8  -5 1090.58   73.96
  -3   8   5 1044.51   72.07
  -3   8   5 1056.85   98.64
  -3  -8   5 1027.87   64.90
   3   8  -4  506.63   51.82
   3   8  -4  497.76   31.73
  -3   8   4  477.37   45.85
  -3   8   4  498.95   65.42
   3   8  -3 1560.16   94.32
   3   8  -3 1620.16   81.04
  -3   8   3 1573.70  110.46
  -3   8   3 1644.60  105.15
   3   8  -2 1563.51   92.60
   3   8  -2 1507.65   79.29
  -3   8   2 1444.95   87.57
   3   8  -1 3596.72  217.81
   3   8  -1 3760.24  179.72
   3   8   0 6898.89  339.34
   3   8   0 6847.66  364.65
   3   8   1 3578.97  181.45
   3   8   1 3642.76  217.85
   3   8   2  531.41   80.55
  -3   8  -2  477.77   45.74
  -3   8  -3  492.89   52.67
  -3  -8  -3  510.89   48.28
  -3   8  -4  924.79  110.08
  -3  -8  -4  894.57   63.13
  -3   8  -5 2495.15  213.96
  -3  -8  -5 2619.89  133.31
  -3   8  -6 1590.28  135.57
  -3  -8  -6 3851.74  197.18
   3   8   7 1360.36   83.85
  -3   8  -7 1384.98  114.61
  -3  -8  -7 1339.24   80.72
  -3   8  -8   52.74   42.69
  -3  -8  -8   41.40   23.12
   3   9  -9  689.36   51.84
  -3   9   9  636.16   60.99
  -3  -9   9  647.15   52.10
   3   9  -8  695.59   52.79
  -3   9   8  493.55   57.02
  -3   9   8  625.98   60.13
  -3  -9   8  595.80   48.41
   3   9  -7  174.17   33.73
  -3   9   7  144.34   38.76
  -3   9   7  171.02   38.27
  -3  -9   7  177.90   27.59
   3   9  -6 1591.19   90.94
  -3   9   6 1591.69   95.88
  -3  -9   6 1403.56   80.48
   3   9  -5 3633.74  176.55
  -3   9   5 3338.01  172.01
   3   9  -4  624.23   55.52
  -3   9   4  575.50   46.25
   3   9  -3  566.77   78.33
   3   9  -3  515.05   33.96
  -3   9   3  531.22   40.31
   3   9  -2  494.07   50.67
   3   9  -2  494.37   36.36
   3   9  -1 1754.88  100.41
   3   9  -1 1786.02   90.35
   3   9   0  169.84   34.77
   3   9   0  169.66   29.76
   3   9   1 1371.31   80.76
   3   9   2 2141.79  112.32
  -3  -9  -2 2046.33  110.00
   3   9   3 2231.20  117.41
  -3   9  -3 2031.38  111.75
  -3  -9  -3 2317.45  117.00
   3   9   4  537.09   79.11
  -3   9  -4  402.44   48.10
  -3  -9  -4  454.76   42.64
  -3   9  -5  315.92   46.76
  -3  -9  -5  370.15   60.37
  -3   9  -6  394.20   53.36
  -3  -9  -6  436.93   41.37
   3  10  -6  575.75   46.39
  -3  10   6  511.12   43.29
   3  10  -5 2791.44  133.68
  -3  10   5 2430.46  118.80
   3  10  -4 1021.65   63.55
  -3  10   4  889.20   51.16
   3  10  -3  660.66   48.02
  -3  10   3  362.57   27.87
   3  10  -2 1059.22   66.63
   3  10  -2 1037.14   66.86
   3  10  -1  175.39   31.10
   3  10  -1  158.62   37.45
   3  10   0  336.95   49.86
  -3 -10   0  261.18   35.96
   3  10   1  893.62   80.02
  -3 -10  -1  823.56   56.10
   3  10   2  645.89   73.44
  -3 -10  -2  657.51   48.43
   3  10   3  202.87   33.74
  -3 -10  -3  214.62   29.64
   3  10   4 3581.43  180.68
  -3 -10  -4 3917.90  179.53
  -4   0  16    2.38   21.03
  -4   0  15  672.41   68.46
  -4   0  14   27.80   51.45
  -4   0  13    6.94   24.04
  -4   0  12 4410.45  222.55
  -4   0  12 4914.00  254.41
   4   0 -11  355.58   26.63
  -4   0  11  352.76   34.53
  -4   0  11  377.02   51.61
   4   0 -10   11.04   17.41
  -4   0  10    1.78   12.20
  -4   0  10   -1.69    9.55
  -4   0  10   14.16   18.71
   4   0  -9 2808.96  125.85
   4   0  -9 2720.65  109.30
   4   0  -9 2870.00  150.91
   4   0  -9 2888.83  123.67
  -4   0   9 2840.55  136.14
  -4   0   9 2786.43  129.28
  -4   0   9 2895.51  134.94
  -4   0   9 2622.64  141.79
   4   0  -8 1644.20   75.74
   4   0  -8 1565.08   60.55
   4   0  -8 1595.99   80.86
   4   0  -8 1581.99   72.56
   4   0  -8 1661.19   92.66
  -4   0   8 1629.60   83.55
  -4   0   8 1569.29   78.15
  -4   0   8 1473.73   78.14
  -4   0   8 1372.63   57.07
  -4   0   8 1714.49   94.96
   4   0  -7 5723.80  254.38
   4   0  -7 5655.49  229.27
   4   0  -7 5949.78  271.09
   4   0  -7 6210.61  269.64
   4   0  -7 6475.76  332.83
  -4   0   7 5603.22  257.69
  -4   0   7 5587.19  259.17
  -4   0   7 5694.37  271.05
  -4   0   7 5384.11  221.34
  -4   0   7 5610.51  269.34
   4   0  -6 1133.25   58.13
   4   0  -6 1082.59   40.39
   4   0  -6 1128.62   68.54
   4   0  -6 1106.21   60.43
   4   0  -6 1108.52   71.96
  -4   0   6 1162.56   63.19
  -4   0   6 1088.33   69.21
  -4   0   6 1161.07   77.38
  -4   0   6 1063.86   41.23
  -4   0   6 1177.07   75.67
   4   0  -5 1471.07   74.88
   4   0  -5 1532.46   52.90
   4   0  -5 1497.84   84.72
   4   0  -5 1518.84   78.61
   4   0  -5 1427.34  120.56
  -4   0   5 1552.49  107.77
  -4   0   5 1429.85   87.85
  -4   0   5 1430.14  105.15
  -4   0   5 1496.53   59.02
  -4   0   5 1689.24  134.19
   4   0  -417721.81  909.14
   4   0  -417682.95  816.11
   4   0  -417751.00  882.96
   4   0  -419365.37  944.24
   4   0  -419168.03  952.67
  -4   0   417840.79  893.93
  -4   0   417581.23  894.63
  -4   0   416170.01  869.71
  -4   0   416709.98  776.64
  -4   0   415898.03  814.43
   4   0  -321804.47 1129.40
   4   0  -323380.06 1232.62
   4   0  -322322.20 1147.96
   4   0  -324150.77 1265.14
   4   0  -324789.59 1326.41
  -4   0   322336.36 1208.57
  -4   0   322159.76 1229.12
  -4   0   323235.39 1112.73
  -4   0   319777.43 1095.04
   4   0  -2  334.52   40.74
   4   0  -2  381.46   52.59
   4   0  -2  372.66   65.69
   4   0  -2  299.36   43.36
  -4   0   2  309.46   42.07
  -4   0   2  326.85   51.71
  -4   0   2  332.23   14.45
  -4   0   2  394.22   44.42
   4   0  -135528.28 1992.41
   4   0  -132927.51 1927.56
   4   0  -134726.49 1912.03
   4   0  -135538.23 1977.70
  -4   0   133988.54 1914.06
  -4   0   133504.38 1888.21
  -4   0   133575.31 1764.76
  -4   0   132590.43 1714.62
  -4   0   134377.24 1963.56
   4   0   0 1595.83   99.32
   4   0   0 1714.10  104.11
   4   0   0 1686.87   99.69
   4   0   0 1734.98   99.19
  -4   0   0 1724.71  146.82
  -4   0   0 1533.96   99.17
  -4   0   0 1663.09   70.12
  -4   0   0 1635.71   60.10
  -4   0   0 1606.22   94.31
   4   0   1   -6.62   23.76
   4   0   1    6.97   20.54
   4   0   1    8.23    9.40
  -4   0  -1    6.07   23.16
  -4   0  -1    0.07   19.44
  -4   0  -1    4.54    7.52
  -4   0  -1   -2.76   18.98
   4   0   228217.79 1574.45
   4   0   227706.17 1520.47
   4   0   227974.55 1457.88
  -4   0  -230321.13 1680.99
  -4   0  -228019.32 1529.56
  -4   0  -227159.36 1433.20
  -4   0  -228011.82 1478.47
  -4   0  -226190.31 1432.70
   4   0   3 6268.07  300.88
   4   0   3 6103.46  311.99
   4   0   3 6300.32  293.20
   4   0   3 6318.68  253.16
   4   0   3 6536.99  310.04
  -4   0  -3 6320.84  295.24
  -4   0  -3 6467.69  276.29
  -4   0  -3 6794.73  290.41
   4   0   4  789.43   63.90
   4   0   4  824.00   75.38
   4   0   4  808.32   68.18
   4   0   4  797.49   60.78
  -4   0  -4  787.72   72.73
  -4   0  -4  754.16   56.58
  -4   0  -4  799.02   58.83
   4   0   5  172.05   37.59
   4   0   5  176.01   45.84
   4   0   5  147.25   34.59
   4   0   5  147.26   55.93
  -4   0  -5  160.41   24.82
  -4   0  -5  165.61   21.09
  -4   0  -5  161.61   35.23
   4   0   6 1112.39  125.49
   4   0   6 1058.74   54.69
   4   0   6 1122.18   74.50
  -4   0  -6 1144.75   76.54
  -4   0  -6 1149.99   59.59
   4   0   710001.48  518.94
   4   0   7 9752.13  495.47
  -4   0  -7 9958.31  481.85
   4   0   8   73.94   40.37
   4   0   8   76.80   53.62
  -4   0  -8   74.49   22.80
   4   0   9 1324.12  146.58
   4   0   9 1213.40   87.14
  -4   0  -9 1268.61  102.85
   4   0  10    8.27   37.14
   4   0  10   19.08   27.02
  -4   0 -10   37.43   19.89
   4   0  11  351.93   61.52
   4   0  11  369.02   75.10
  -4   0 -11  338.66   37.49
   4   0  12  230.95   83.37
   4   0  12  220.23   39.48
  -4   0 -12  220.18   48.62
   4   0  13  467.33   57.05
   4   0  13  426.78   43.43
  -4   0 -13  491.25   38.54
  -4   1  16 2691.51  147.87
  -4  -1  16 2447.59  140.35
  -4   1  15  271.84   33.88
  -4   1  15  369.98   50.75
  -4  -1  15  321.29   50.60
  -4   1  14  583.26   73.62
  -4   1  14  595.90  100.13
  -4  -1  14  892.59  109.58
  -4   1  13 1779.17  105.45
  -4   1  13 1720.06  111.32
  -4  -1  13 1845.66  155.72
  -4   1  12  696.54   59.76
  -4   1  12  686.84   65.53
  -4  -1  12  802.73   69.64
   4   1 -11  738.89   40.12
  -4   1  11  889.71   70.93
  -4   1  11  930.96   66.20
  -4  -1  11  930.72   56.51
   4  -1 -11  954.70   55.18
  -4  -1  11  810.39   72.24
   4   1 -10 1402.55   62.63
   4   1 -10 1318.40   64.57
  -4   1  10 1616.95   93.35
  -4   1  10 1634.29   95.92
   4  -1 -10 1598.08   82.87
  -4  -1  10 1529.10  105.44
  -4  -1  10 1529.69   96.22
   4   1  -9 3052.38  127.54
  -4   1   9 3407.39  169.14
   4   1  -9 3354.23  149.14
   4   1  -9 3283.76  139.11
  -4   1   9 2956.92  152.30
   4  -1  -9 3339.06  159.53
  -4  -1   9 3052.77  131.17
  -4  -1   9 3173.37  163.58
  -4  -1   9 3405.66  187.16
   4   1  -8 2604.25  108.89
  -4   1   8 2523.80  130.51
   4   1  -8 2712.26  111.64
  -4   1   8 2925.85  147.89
   4   1  -8 2790.94  127.76
   4   1  -8 2733.27  133.43
  -4   1   8 2707.61  134.55
   4   1  -8 2687.43  139.88
  -4   1   8 2643.96  135.86
   4  -1  -8 3325.56  155.51
  -4  -1   8 3134.10  132.30
   4  -1  -8 3178.19  151.11
   4  -1  -8 3150.63  155.96
  -4  -1   8 3348.03  159.91
   4  -1  -8 3107.88  144.70
  -4  -1   8 3135.48  128.03
  -4  -1   8 2634.25  139.87
  -4  -1   8 3246.45  154.57
   4   1  -7  314.52   20.24
  -4   1   7  313.58   31.04
   4   1  -7  322.17   20.03
  -4   1   7  414.91   41.06
   4   1  -7  343.71   32.47
   4   1  -7  345.04   42.52
   4   1  -7  349.03   28.14
  -4   1   7  322.84   41.39
  -4   1   7  318.24   43.38
   4  -1  -7  370.10   32.10
   4  -1  -7  325.80   36.77
  -4  -1   7  344.42   41.72
  -4  -1   7  312.72   23.83
   4  -1  -7  398.13   39.41
  -4  -1   7  328.49   30.84
  -4  -1   7  354.69   43.97
   4  -1  -7  346.02   39.75
   4   1  -6 9568.81  437.75
   4   1  -6 9992.31  456.75
  -4   1   610395.14  538.47
   4   1  -610706.67  480.91
  -4   1   610941.91  512.76
   4   1  -610046.02  469.73
  -4   1   6 9647.46  479.93
   4   1  -610737.12  507.69
  -4   1   610816.93  519.38
   4  -1  -6 9565.56  444.94
   4  -1  -610152.77  477.67
  -4  -1   610094.95  471.81
  -4  -1   6 9755.44  522.74
   4  -1  -6 9228.16  488.50
  -4  -1   6 9907.62  496.57
   4  -1  -6 9345.15  394.66
  -4  -1   6 9410.39  417.50
   4  -1  -610034.58  479.87
  -4  -1   6 8245.46  463.82
   4   1  -5 4777.48  193.32
   4   1  -5 4735.01  266.82
   4   1  -5 4732.51  186.42
   4   1  -5 4754.84  217.22
  -4   1   5 5313.96  275.35
   4   1  -5 5437.65  265.64
  -4   1   5 4949.85  281.69
  -4   1   5 4376.29  222.41
  -4   1   5 4751.54  251.40
   4  -1  -5 4835.41  220.63
   4  -1  -5 5007.17  221.21
  -4  -1   5 4662.63  195.43
  -4  -1   5 4764.43  247.02
   4  -1  -5 4845.27  229.89
  -4  -1   5 4729.48  196.42
  -4  -1   5 4111.16  209.55
  -4  -1   5 4816.75  280.49
   4   1  -4  320.36   21.56
   4   1  -4  311.52   36.67
   4   1  -4  309.84   43.42
   4   1  -4  305.83   26.28
  -4   1   4  349.90   37.85
   4   1  -4  314.01   39.19
  -4   1   4  328.69   41.30
  -4   1   4  302.34   45.45
   4  -1  -4  240.17   54.83
   4  -1  -4  264.52   40.35
   4  -1  -4  263.24   34.55
  -4  -1   4  277.21   33.94
  -4  -1   4  393.57   49.64
   4  -1  -4  249.03   42.69
  -4  -1   4  263.80   63.15
  -4  -1   4  260.37   15.72
  -4  -1   4  251.66   44.44
   4  -1  -4  281.57   38.86
   4   1  -3 2056.02  103.56
   4   1  -3 1917.23   82.08
  -4   1   3 2014.69  135.97
   4   1  -3 2029.67   77.07
   4   1  -3 1976.46  106.98
  -4   1   3 1972.36  113.97
   4   1  -3 1988.50  114.54
  -4   1   3 1912.24  115.89
   4  -1  -3 2794.33  127.23
   4  -1  -3 2712.74  119.94
  -4  -1   3 2729.31  124.87
  -4  -1   3 2844.16  143.34
   4  -1  -3 2822.36  139.84
  -4  -1   3 2487.91  155.68
  -4  -1   3 2776.53   97.15
   4  -1  -3 2884.01  140.74
  -4  -1   3 3074.75  186.11
   4   1  -225498.51 1330.91
  -4   1   226650.25 1404.34
  -4   1   225342.61 1380.48
   4   1  -225877.37 1312.09
   4   1  -226637.03 1407.39
   4   1  -227220.68 1452.89
  -4   1   225535.31 1435.79
   4  -1  -226306.64 1383.64
   4  -1  -226767.92 1407.48
  -4  -1   225585.86 1339.12
  -4  -1   225435.74 1371.95
   4  -1  -226859.54 1502.68
  -4  -1   226460.59 1335.84
  -4  -1   227771.95 1476.35
   4  -1  -224734.41 1349.22
   4   1  -1 9038.23  407.67
   4   1  -1 8831.03  423.01
  -4   1   1 8753.68  424.16
   4   1  -1 9127.32  415.58
   4   1  -1 7439.30  370.86
  -4   1   1 8680.66  482.20
  -4   1   1 8832.26  439.68
   4  -1  -1 8769.43  486.59
   4  -1  -1 9194.03  442.69
   4  -1  -1 8289.56  416.68
  -4  -1   1 8263.04  399.60
   4  -1  -1 8888.61  393.03
  -4  -1   1 8816.84  403.49
  -4  -1   1 8721.42  470.75
  -4  -1   1 8479.19  356.97
   4   1   0 5042.24  240.09
   4   1   0 4438.79  238.36
   4   1   0 4589.07  217.77
  -4   1   0 4478.65  169.34
  -4   1   0 4594.57  206.55
   4   1   0 4713.10  205.89
  -4   1   0 4166.84  221.35
  -4   1   0 4708.18  232.60
  -4   1   0 4816.21  176.15
   4  -1   0 4678.39  231.81
   4  -1   0 4571.61  205.92
  -4  -1   0 4250.28  203.19
  -4  -1   0 4213.89  202.27
   4  -1   0 4595.84  236.01
  -4  -1   0 4681.72  187.51
  -4  -1   0 4599.36  201.54
  -4  -1   0 4443.84  216.52
   4  -1   0 4587.54  188.11
   4   1   1  270.98   34.12
  -4   1  -1  259.13   24.72
   4   1   1  284.51   41.44
   4   1   1  313.72   64.84
  -4   1  -1  293.92   34.79
  -4   1  -1  280.91   93.70
   4   1   1  296.83   44.61
   4   1   1  361.44   49.73
  -4   1  -1  306.97   16.98
  -4   1  -1  293.38   84.71
   4  -1   1  366.92   29.90
  -4  -1  -1  379.19   25.53
  -4  -1  -1  373.52   39.57
  -4  -1  -1  384.31   25.93
   4  -1   1  369.17   57.76
  -4  -1  -1  373.77   29.20
  -4  -1  -1  371.44   47.05
   4  -1   1  374.90   87.44
   4   1   210747.12  510.75
   4   1   210971.82  541.17
  -4   1  -211116.90  567.98
   4   1   210679.41  537.04
  -4   1  -211081.57  541.84
  -4   1  -210867.25  482.82
   4   1   211423.42  510.18
   4   1   2 9908.27  494.52
  -4   1  -211135.56  490.89
   4  -1   210487.11  460.84
   4  -1   210738.90  528.69
  -4  -1  -210384.96  473.74
  -4  -1  -210408.06  494.67
  -4  -1  -210702.07  509.61
   4  -1   210278.37  531.02
  -4  -1  -210559.94  480.60
  -4  -1  -211351.72  548.10
   4   1   3 1335.09   74.73
   4   1   3 1177.13  118.14
  -4   1  -3 1266.53   54.17
   4   1   3 1353.10   64.66
  -4   1  -3 1309.19  111.95
   4   1   3 1344.36   52.31
   4   1   3 1227.92   81.27
  -4   1  -3 1332.71   56.03
   4   1   3 1197.96   79.21
  -4   1  -3 1342.04   99.87
   4  -1   3 1012.22   70.86
  -4  -1  -3  976.74   54.29
  -4  -1  -3  956.86   69.66
   4  -1   3 1026.57   63.77
  -4  -1  -3  982.34   53.01
   4  -1   3  959.28   86.57
  -4  -1  -3 1024.68   45.80
  -4   1  -4 1398.61   62.43
   4   1   4 1380.82  111.54
  -4   1  -4 1309.56   60.59
   4   1   4 1397.20  134.77
   4   1   4 1332.45   64.08
  -4   1  -4 1436.66   84.50
   4   1   4 1259.30   55.23
   4   1   4 1396.91   88.43
   4   1   4 1248.14   84.25
   4  -1   4 1639.15   84.03
  -4  -1  -4 1568.07   86.57
   4  -1   4 1534.85   83.30
  -4  -1  -4 1477.89   69.75
   4  -1   4 1493.90   92.31
  -4  -1  -4 1583.12   73.22
   4  -1   4 1535.78  106.56
  -4  -1  -4 1471.42   56.00
   4   1   5 1484.87  124.74
   4   1   5 1396.88   86.69
   4   1   5 1266.88  119.90
   4   1   5 1365.11  137.30
   4   1   5 1281.01   56.91
  -4   1  -5 1307.25   61.47
  -4   1  -5 1395.53   63.94
  -4   1  -5 1321.86   76.23
   4  -1   5 1213.61   70.58
  -4  -1  -5 1132.69   54.78
   4  -1   5 1192.85   69.74
  -4  -1  -5 1238.68   65.45
   4  -1   5 1257.99   84.87
  -4  -1  -5 1262.52   64.99
   4  -1   5 1201.41   97.64
   4   1   6  630.01   63.69
   4   1   6  628.54   61.53
  -4   1  -6  615.70   50.02
   4  -1   6  847.37   68.12
   4  -1   6  868.17   57.04
  -4  -1  -6  877.17   72.48
   4   1   7 1572.83  104.82
  -4   1  -7 1491.14   83.40
   4   1   7 1505.77   98.38
  -4   1  -7 1489.58   96.81
   4  -1   7 1368.82   99.57
  -4  -1  -7 1399.15   76.29
   4  -1   7 1347.69  108.99
   4   1   8 2435.82  194.14
   4   1   8 2398.23  184.90
  -4   1  -8 2329.02  116.09
   4  -1   8 2503.68  151.58
   4  -1   8 2423.67  129.63
  -4  -1  -8 2522.59  125.75
   4   1   9 1362.75   97.57
   4   1   9 1390.20  109.10
  -4   1  -9 1380.26   77.58
   4  -1   9 1400.80  104.49
  -4  -1  -9 1372.64   81.06
   4  -1   9 1350.69   85.21
   4   1  10  439.48   67.70
   4   1  10  406.09   56.76
  -4   1 -10  428.64   39.22
   4  -1  10  480.14  110.05
   4  -1  10  405.73   69.48
  -4  -1 -10  426.57   66.19
   4   1  11  496.20   69.05
   4   1  11  467.79   91.49
  -4   1 -11  484.22   63.05
   4  -1  11  544.86   66.52
   4  -1  11  477.64   46.33
  -4  -1 -11  489.78   45.57
   4   1  12   75.92   74.16
   4   1  12   57.29   34.84
  -4   1 -12   77.60   24.00
   4  -1  12  113.99   39.68
   4  -1  12  128.16   25.96
  -4  -1 -12  127.05   26.29
   4   1  13  408.23   55.98
   4   1  13  373.94   44.94
  -4   1 -13  374.19   33.91
   4  -1  13  391.54   51.08
   4  -1  13  359.50   47.22
  -4  -1 -13  401.91   57.62
  -4   2  16  293.14   41.32
  -4  -2  16  338.39   41.99
   4   2 -15  535.05   35.04
  -4   2  15  746.64   58.92
  -4   2  15  802.93   64.41
  -4  -2  15  771.85   64.60
   4   2 -14  173.99   18.69
  -4   2  14  180.22   61.91
  -4   2  14  196.99   62.90
  -4  -2  14  119.95   39.51
   4   2 -13 1781.63   86.79
  -4   2  13 1907.98  119.85
  -4   2  13 1893.27  112.47
  -4  -2  13 1980.95  102.75
  -4  -2  13 2049.60  123.19
   4   2 -12  279.16   38.98
  -4   2  12  323.85   44.14
  -4   2  12  308.78   50.06
  -4  -2  12  343.64   55.84
   4  -2 -12  328.15   32.14
  -4  -2  12  376.77   77.60
   4   2 -11 8115.27  400.39
  -4   2  11 8418.16  438.40
  -4   2  11 8051.34  407.51
   4  -2 -11 7795.37  393.86
  -4  -2  11 8446.21  456.08
  -4  -2  11 8051.11  450.05
   4   2 -10  970.53   65.63
  -4   2  10 1216.10   86.48
  -4   2  10 1183.11   74.59
   4  -2 -10 1029.15   69.85
  -4  -2  10 1264.43   79.19
  -4  -2  10 1205.55  112.59
   4   2  -9 1508.43   81.52
   4   2  -9 1384.31   79.96
   4   2  -9 1535.46   66.22
  -4   2   9 1694.76  104.90
  -4   2   9 1657.34   90.32
  -4  -2   9 1689.87   97.25
  -4  -2   9 1836.04  130.65
  -4   2   8 2479.38  118.96
   4   2  -8 2330.90  111.61
   4   2  -8 2466.27  127.15
   4   2  -8 2464.51  102.80
   4   2  -8 2520.73  126.22
  -4   2   8 2414.27  134.66
  -4   2   8 2443.48  116.60
   4  -2  -8 2375.80  111.17
   4  -2  -8 2308.47  122.43
  -4  -2   8 2384.31  132.80
  -4  -2   8 2202.94   96.99
  -4  -2   8 2384.63  127.33
   4  -2  -8 2254.84  112.11
  -4  -2   8 2015.53  148.57
  -4   2   713260.73  650.95
   4   2  -713360.77  637.42
   4   2  -713641.26  692.02
  -4   2   713325.30  636.62
   4   2  -714978.18  713.30
  -4   2   712931.52  624.71
   4   2  -714452.09  713.19
  -4   2   712829.40  666.73
  -4   2   715225.63  738.12
   4  -2  -713515.93  660.04
  -4  -2   713308.91  689.91
   4  -2  -713163.13  650.12
  -4  -2   713148.60  628.35
   4  -2  -714238.07  712.17
  -4  -2   714416.43  726.20
  -4  -2   714308.17  750.23
  -4   2   6  830.92   54.97
   4   2  -6  785.13   38.27
   4   2  -6  799.54   72.96
  -4   2   6  852.18   46.93
   4   2  -6  826.01   66.86
  -4   2   6  841.78   50.62
   4   2  -6  819.88   58.57
  -4   2   6  774.37   69.36
  -4   2   6  814.59   49.09
   4  -2  -6  830.11   77.38
  -4  -2   6  865.33  120.25
   4  -2  -6  857.07   70.80
  -4  -2   6  889.24   39.65
   4  -2  -6  827.34   66.90
  -4  -2   6  863.26   68.41
  -4  -2   6  856.57   62.04
  -4   2   5 4700.24  231.17
   4   2  -5 4558.60  187.50
   4   2  -5 4590.22  240.87
  -4   2   5 4698.64  230.65
   4   2  -5 5379.84  231.13
   4   2  -5 4854.70  224.01
  -4   2   5 4483.03  279.96
  -4   2   5 4296.06  198.50
   4  -2  -5 4685.30  203.56
  -4  -2   5 4584.41  228.58
  -4  -2   5 4460.91  235.65
  -4  -2   5 4669.80  188.98
   4  -2  -5 4514.01  202.93
   4  -2  -5 4638.15  228.13
  -4  -2   5 4344.84  210.33
  -4   2   4 4409.68  191.55
  -4   2   4 4479.94  228.83
   4   2  -4 4610.49  203.65
   4   2  -4 4696.37  250.97
   4   2  -4 4870.36  214.99
   4   2  -4 4797.05  221.90
  -4   2   4 4547.74  238.27
  -4   2   4 4715.13  209.42
   4  -2  -4 4366.81  188.35
   4  -2  -4 4219.88  195.66
  -4  -2   4 4314.79  216.50
  -4  -2   4 4206.55  226.85
  -4  -2   4 4461.42  179.25
   4  -2  -4 4238.77  217.98
  -4  -2   4 3771.92  230.07
  -4   2   3 1173.14   92.22
   4   2  -3 1216.10   55.09
   4   2  -3 1326.58   78.51
   4   2  -3 1258.99   79.73
  -4   2   3 1227.49   79.60
  -4   2   3 1263.90   76.33
  -4   2   3 1446.00   72.63
   4  -2  -3 1271.48  109.30
   4  -2  -3 1358.11   62.01
  -4  -2   3 1216.87  126.10
  -4  -2   3 1231.63   67.46
  -4  -2   3 1318.45   78.54
   4  -2  -3 1252.77   90.99
  -4  -2   3 1380.29   83.59
   4   2  -2 1878.92   64.96
  -4   2   2 1864.58   81.22
   4   2  -2 1867.23   73.55
   4   2  -2 1835.52   77.86
   4   2  -2 1899.39   99.63
   4   2  -2 1751.19  100.57
  -4   2   2 1791.79  118.64
  -4   2   2 1808.32  104.71
  -4   2   2 1999.67   89.44
   4  -2  -2 1819.11  104.54
   4  -2  -2 1637.73   90.25
  -4  -2   2 1831.96  103.09
  -4  -2   2 1889.79   77.55
  -4  -2   2 1883.94   99.66
   4  -2  -2 1733.17  114.09
  -4  -2   2 1985.15  106.24
   4   2  -1 1251.97   50.25
  -4   2   1 1268.47   59.82
   4   2  -1 1261.87   54.79
  -4   2   1 1231.43   98.47
   4   2  -1 1247.61   58.80
  -4   2   1 1185.62  131.06
   4   2  -1 1270.93   77.09
   4   2  -1 1322.05   86.58
   4  -2  -1 1608.96   67.35
   4  -2  -1 1649.53   98.54
  -4  -2   1 1565.48   85.52
   4  -2  -1 1635.02   72.30
  -4  -2   1 1559.62   65.70
  -4  -2   1 1633.67   85.60
   4  -2  -1 1595.25  106.64
  -4  -2   1 1727.07   93.67
   4   2   0 2879.24  115.51
  -4   2   0 2745.04   94.71
   4   2   0 2891.34  122.89
  -4   2   0 2531.50  154.87
   4   2   0 2791.65  118.12
  -4   2   0 2815.41  152.41
   4   2   0 2784.56  128.39
   4   2   0 2851.02  148.47
  -4   2   0 2845.27   98.81
  -4   2   0 2898.90  120.09
   4  -2   0 2764.06  134.35
  -4  -2   0 2767.26  130.61
   4  -2   0 2918.91  154.98
  -4  -2   0 2780.50  116.75
   4  -2   0 2709.04  216.81
  -4  -2   0 2748.47  160.50
  -4  -2   0 2746.95  142.15
   4  -2   0 2843.70  112.94
   4   2   124901.72 1307.97
   4   2   125230.54 1310.66
   4   2   124156.67 1276.06
   4   2   124730.62 1296.17
  -4   2  -125913.44 1410.71
   4   2   125792.96 1332.69
  -4   2  -124083.15 1303.73
  -4   2  -123698.22 1202.75
   4   2   126845.83 1478.27
   4  -2   122927.58 1195.48
   4  -2   124044.72 1300.12
  -4  -2  -122833.56 1232.82
   4  -2   124338.80 1233.19
   4  -2   123033.26 1270.50
  -4  -2  -123877.21 1236.19
  -4  -2  -124522.18 1320.03
  -4  -2  -122089.44 1189.03
   4   2   2 7150.82  352.17
   4   2   2 8553.33  399.85
   4   2   2 6916.64  358.14
   4   2   2 7437.71  332.62
  -4   2  -2 7487.43  415.39
   4   2   2 7315.03  342.93
  -4   2  -2 7284.73  303.29
  -4   2  -2 7701.72  450.08
   4  -2   2 7336.68  374.86
  -4  -2  -2 7208.44  322.82
   4  -2   2 7128.71  352.18
  -4  -2  -2 7383.26  325.01
   4  -2   2 6798.52  305.07
  -4  -2  -2 7237.47  321.62
  -4  -2  -2 7487.23  333.24
  -4  -2  -2 7657.50  362.41
   4   2   3   58.11   22.75
   4   2   3   66.03   30.49
   4   2   3   59.27   25.78
   4   2   3  108.56   13.56
  -4   2  -3   58.93   11.33
   4   2   3   63.28   13.79
  -4   2  -3   68.24   39.84
   4   2   3   62.61   30.81
  -4   2  -3   71.15   32.66
   4  -2   3  101.47   32.66
   4  -2   3   88.90   17.36
  -4  -2  -3   80.61   13.26
  -4  -2  -3   94.62   19.76
   4  -2   3   97.32   66.77
  -4  -2  -3   78.82   19.74
  -4  -2  -3   88.10   15.39
   4   2   4 4308.07  205.74
   4   2   4 3944.12  202.37
   4   2   4 4501.61  222.37
  -4   2  -4 4378.38  185.59
   4   2   4 4497.11  198.16
   4   2   4 4474.46  219.68
  -4   2  -4 4412.71  184.58
  -4   2  -4 4372.91  218.73
   4  -2   4 4802.98  232.45
  -4  -2  -4 4652.81  229.81
   4  -2   4 4546.82  290.42
  -4  -2  -4 4911.01  236.66
   4  -2   4 4278.91  191.72
  -4  -2  -4 4617.36  195.62
  -4   2  -5  200.42   20.38
   4   2   5  192.06   35.08
   4   2   5  183.91   65.47
  -4   2  -5  174.14   61.40
  -4   2  -5  174.29   19.66
   4  -2   5  211.28   24.50
  -4  -2  -5  217.06   29.04
   4  -2   5  216.17   40.40
  -4   2  -6 2000.53   91.23
   4   2   6 2043.16  117.07
   4   2   6 2021.68  117.79
  -4   2  -6 1967.01  114.82
   4  -2   6 2003.34  117.70
  -4  -2  -6 2001.85  103.14
   4  -2   6 1930.69  116.08
  -4   2  -7 1789.62   87.11
   4   2   7 1786.96  159.49
   4   2   7 1758.95  113.99
  -4   2  -7 1720.58  104.26
   4  -2   7 1778.73   92.42
  -4  -2  -7 1835.79  103.21
   4  -2   7 1892.92  152.78
  -4   2  -8 2090.25  100.98
   4   2   8 2155.47  136.14
   4   2   8 2099.53  172.16
  -4   2  -8 2367.49  159.73
   4  -2   8 1903.12  102.36
  -4  -2  -8 1971.61  105.26
   4  -2   8 1966.78  124.84
  -4   2  -9  992.96   78.11
   4   2   9 1030.65   91.89
   4   2   9  986.22   86.18
  -4   2  -9  974.72   68.82
   4  -2   9 1077.09   85.23
  -4  -2  -9 1176.83   72.47
   4  -2   9 1196.28   92.03
   4   2  10  184.22   51.07
   4   2  10  169.77   46.01
  -4   2 -10  193.00   45.27
   4  -2  10  222.43   72.46
   4  -2  10  197.44   27.82
  -4  -2 -10  181.73   32.86
   4   2  11  793.41  125.37
   4   2  11  810.53  109.44
  -4   2 -11  799.42   52.25
   4  -2  11  945.25   79.20
   4  -2  11  756.54   50.09
  -4  -2 -11  821.61   85.48
   4   2  12 1004.82   83.58
   4   2  12  988.34   76.64
  -4   2 -12  881.85   55.48
   4  -2  12  974.51   76.18
   4  -2  12  752.01   61.27
  -4  -2 -12  819.66   57.45
   4   3 -15 1750.72   91.78
  -4   3  15 1955.64  117.10
  -4   3  15 1891.53  100.79
  -4  -3  15 1742.57  125.74
   4   3 -14  200.19   23.13
  -4   3  14  226.04   79.86
  -4   3  14  193.45   54.18
  -4  -3  14  261.06   30.02
  -4  -3  14  285.10   37.54
   4   3 -13  195.75   23.48
  -4   3  13  178.67   50.51
  -4   3  13  226.03   80.94
  -4  -3  13  249.91   34.35
   4  -3 -13  192.01   24.88
  -4  -3  13  218.50   37.15
   4   3 -12 2006.18   94.24
  -4   3  12 1917.62  104.82
  -4   3  12 2049.73  131.85
  -4  -3  12 1909.96  142.55
   4  -3 -12 1682.31   96.61
  -4  -3  12 1862.00  109.69
   4   3 -11  797.16   46.93
  -4   3  11  832.05   56.92
  -4   3  11  835.55   80.64
  -4  -3  11  875.65   70.21
   4  -3 -11  630.06   58.62
  -4  -3  11  871.49   65.49
   4   3 -1010009.82  486.36
  -4   3  1010681.58  567.49
  -4   3  1010564.57  527.69
  -4  -3  1010206.69  531.65
  -4  -3  1010238.79  521.81
   4   3  -9 1244.80   61.79
  -4   3   9 1259.95   95.60
  -4   3   9 1205.69   71.99
  -4   3   9 1214.17   67.11
  -4  -3   9 1251.47   87.44
  -4  -3   9 1077.77   73.31
   4   3  -8 2281.20  101.69
   4   3  -8 2427.28  107.68
   4   3  -8 2139.96   92.26
  -4   3   8 2111.54  107.36
  -4   3   8 2331.31  139.15
  -4   3   8 2244.24  105.92
  -4  -3   8 2427.94  135.25
   4  -3  -8 2390.53  111.05
  -4  -3   8 2284.47  116.93
   4   3  -7  666.43   46.93
   4   3  -7  657.93   37.86
   4   3  -7  691.60   42.25
  -4   3   7  681.29   40.19
   4   3  -7  684.76   50.29
  -4   3   7  619.95   48.91
  -4   3   7  626.85   68.36
   4  -3  -7  687.37   49.44
  -4  -3   7  702.31   63.30
  -4  -3   7  696.59   68.03
  -4  -3   7  736.36   54.49
   4  -3  -7  715.85   53.31
   4  -3  -7  711.57   61.91
  -4  -3   7  774.01   52.86
  -4   3   6 6085.31  283.43
   4   3  -6 6616.37  288.44
   4   3  -6 6599.50  299.39
  -4   3   6 6070.12  270.29
   4   3  -6 6493.94  289.85
  -4   3   6 6075.21  270.52
   4   3  -6 6292.92  291.88
  -4   3   6 6795.21  389.88
  -4   3   6 6207.71  293.16
   4  -3  -6 6652.50  304.05
  -4  -3   6 6828.05  341.10
   4  -3  -6 6493.34  287.18
  -4  -3   6 6907.35  295.90
   4  -3  -6 6539.14  325.56
  -4  -3   6 6765.50  330.54
  -4  -3   6 6404.25  300.47
  -4   3   5 3657.67  163.61
  -4   3   5 3398.61  140.92
   4   3  -5 3377.66  160.05
   4   3  -5 3573.12  160.45
  -4   3   5 3490.04  159.73
   4   3  -5 3082.59  141.16
   4   3  -5 3383.49  180.14
  -4   3   5 3407.18  183.58
   4  -3  -5 3093.70  128.40
  -4  -3   5 3215.00  167.28
   4  -3  -5 3138.41  145.44
  -4  -3   5 3130.85  217.68
  -4  -3   5 3307.90  152.68
   4  -3  -5 3108.98  167.34
   4  -3  -5 3134.97  133.07
  -4  -3   5 2943.21  173.80
  -4   3   4 4305.44  227.93
   4   3  -4 4567.77  193.80
   4   3  -4 4450.57  205.05
   4   3  -4 4395.69  200.26
  -4   3   4 4308.18  188.23
  -4   3   4 4257.92  208.40
  -4   3   4 3978.99  184.29
   4  -3  -4 4436.99  194.70
   4  -3  -4 4410.80  189.16
  -4  -3   4 4534.32  222.79
  -4  -3   4 4715.47  196.02
  -4  -3   4 4766.20  216.21
   4  -3  -4 4322.54  272.06
  -4  -3   4 4808.34  218.55
  -4   3   3 1002.58   83.74
   4   3  -3  918.25   48.01
   4   3  -3  954.97   91.49
   4   3  -3 1009.76   86.07
  -4   3   3  939.09   39.25
  -4   3   3  942.03   80.12
  -4   3   3  951.43   53.70
   4  -3  -3  887.09   54.09
   4  -3  -3  874.24   36.32
  -4  -3   3  945.63  100.71
  -4  -3   3  995.11   65.16
  -4  -3   3  900.81   60.88
   4  -3  -3  870.34   74.93
  -4  -3   3  797.24   56.65
  -4   3   2  804.90   77.36
   4   3  -2  854.66   46.31
   4   3  -2  757.56   55.28
   4   3  -2  814.37   55.22
  -4   3   2  796.21   32.65
  -4   3   2  771.84   56.34
  -4   3   2  821.53   45.59
   4  -3  -2  751.37   56.81
   4  -3  -2  728.00   37.00
  -4  -3   2  716.33   55.78
  -4  -3   2  763.84   43.70
  -4  -3   2  726.75   55.76
   4  -3  -2  736.21  111.93
  -4  -3   2  757.40   83.51
  -4   3   1  203.96   19.95
   4   3  -1  210.95   25.57
   4   3  -1  210.59   34.41
   4   3  -1  239.50   57.18
  -4   3   1  263.13   51.78
  -4   3   1  211.67   38.68
  -4   3   1  200.14   20.50
   4  -3  -1  253.65   65.42
   4  -3  -1  250.71   13.68
  -4  -3   1  254.24   30.94
  -4  -3   1  275.98   41.26
  -4  -3   1  267.35   62.31
  -4  -3   1  269.93   35.35
   4  -3  -1  224.05   49.90
   4   3   0 2753.42  114.52
   4   3   0 2720.81  106.71
  -4   3   0 2811.91  213.52
   4   3   0 2847.06  148.11
   4   3   0 2774.47  131.34
   4   3   0 2607.37  131.61
  -4   3   0 2569.89   93.71
  -4   3   0 2745.58  146.00
   4  -3   0 2865.15  159.64
   4  -3   0 2678.23   95.76
   4  -3   0 2787.58  103.52
  -4  -3   0 2856.73  145.00
   4  -3   0 2988.58  151.26
  -4  -3   0 2998.62  127.40
  -4  -3   0 2981.41  139.28
  -4  -3   0 3212.16  180.36
   4   3   1 5240.46  224.76
  -4   3  -1 5289.78  302.78
   4   3   1 4696.10  214.71
  -4   3  -1 4975.26  195.16
   4   3   1 5201.95  224.65
  -4   3  -1 5184.78  263.39
   4   3   1 4964.78  247.67
   4   3   1 4917.82  232.40
   4  -3   1 4481.32  179.59
   4  -3   1 4311.50  171.61
   4  -3   1 5004.12  244.71
   4  -3   1 4824.35  199.00
   4  -3   1 4502.11  177.48
  -4  -3  -1 4788.82  205.32
   4  -3   1 4971.75  302.39
   4  -3   1 4625.21  184.08
  -4  -3  -1 4727.00  206.35
  -4  -3  -1 5042.46  227.80
  -4  -3  -1 4796.25  223.44
   4   3   2 1761.28   93.41
   4   3   2 1695.63   98.91
  -4   3  -2 1612.12  155.42
   4   3   2 1719.51   82.28
  -4   3  -2 1551.17   61.13
   4   3   2 1632.03  124.32
  -4   3  -2 1642.52  106.22
   4  -3   2 1775.88   66.15
   4  -3   2 1824.21   70.66
   4  -3   2 1842.39  108.78
  -4  -3  -2 1795.71   72.20
   4  -3   2 1705.36   70.33
  -4  -3  -2 2068.16  115.14
  -4  -3  -2 1945.90   90.24
   4   3   3  211.86   38.99
   4   3   3  202.82   27.19
  -4   3  -3  225.63   48.81
  -4   3  -3  220.62   44.27
   4   3   3  213.78   23.48
   4   3   3  247.26   35.82
   4   3   3  225.14   36.36
  -4   3  -3  212.15   15.00
   4  -3   3  181.61   13.76
   4  -3   3  198.62   15.13
  -4  -3  -3  222.69   27.62
   4  -3   3  206.87   42.05
  -4  -3  -3  228.76   28.34
  -4  -3  -3  232.65   24.37
   4   3   4 4011.19  215.01
   4   3   4 3711.40  183.43
  -4   3  -4 4228.88  186.97
   4   3   4 3833.18  168.34
   4   3   4 4304.21  207.28
  -4   3  -4 4090.12  222.75
  -4   3  -4 3773.69  202.57
  -4  -3  -4 4527.55  199.66
   4  -3   4 4095.75  171.37
  -4  -3  -4 4526.27  196.78
  -4   3  -5  355.98   35.11
   4   3   5  355.65   38.19
   4   3   5  356.59   22.41
   4   3   5  369.07   67.73
  -4   3  -5  328.63   52.45
  -4  -3  -5  218.15   55.65
   4  -3   5  215.67   42.71
  -4  -3  -5  221.44   20.56
  -4   3  -6  257.52   49.56
   4   3   6  260.72   40.22
   4   3   6  251.15   43.18
  -4   3  -6  294.92   38.33
   4  -3   6  242.69   43.49
  -4  -3  -6  238.94   37.43
  -4   3  -7  204.60   46.54
   4   3   7  207.01   42.50
   4   3   7  220.59   44.56
  -4   3  -7  216.14   38.45
   4  -3   7  267.38   70.53
  -4  -3  -7  288.04   40.60
  -4   3  -8 1197.30  127.01
   4   3   8 1140.94   86.22
   4   3   8 1161.77  125.91
  -4   3  -8 1134.50   62.10
   4  -3   8 1072.06   84.84
  -4  -3  -8 1089.19  109.13
  -4   3  -9 1546.79  102.51
   4   3   9 1659.65  148.46
   4   3   9 1517.94  103.71
  -4   3  -9 1503.22   78.06
   4  -3   9 1604.66  106.54
  -4  -3  -9 1530.40   89.73
  -4   3 -10  932.57   90.02
   4   3  10 1043.75   86.18
   4   3  10  949.73   78.73
  -4   3 -10  935.70   55.72
   4  -3  10  833.57  103.85
  -4  -3 -10  748.49   59.44
   4   3  11 1570.93  104.49
   4   3  11 1592.27  135.56
  -4   3 -11 1172.23   67.33
   4  -3  11 1577.12   98.09
  -4  -3 -11 1401.19  110.44
   4   3  12 1375.29   93.58
   4   3  12 1269.02   85.77
  -4   3 -12 1232.68   82.79
   4  -3  12 1325.49   79.39
  -4  -3 -12 1268.78   75.70
   4   4 -15   35.84   12.72
  -4   4  15   86.68   31.43
   4   4 -14  574.69   54.07
  -4   4  14  604.28   68.63
  -4   4  14  467.77   36.44
  -4  -4  14  569.91   46.73
  -4  -4  14  500.77   56.06
   4   4 -13  637.78   60.26
  -4   4  13  576.68   41.90
  -4   4  13  650.81   76.92
  -4  -4  13  754.86   90.09
   4  -4 -13  674.82   49.51
  -4  -4  13  715.87   68.70
   4   4 -12  861.79   50.89
  -4   4  12  799.44   64.17
  -4   4  12  848.95  132.78
  -4  -4  12  863.48   72.75
   4  -4 -12  615.56   56.97
  -4  -4  12  777.10   55.07
   4   4 -11  930.92   55.49
  -4   4  11  904.49  137.63
  -4   4  11  862.11   63.77
  -4  -4  11 1020.00   81.29
  -4  -4  11  955.64   62.52
   4   4 -10  292.36   30.04
  -4   4  10  265.87   97.02
  -4   4  10  278.75   37.21
  -4  -4  10  217.00   50.97
  -4  -4  10  237.44   33.56
   4   4  -9   56.97   19.79
  -4   4   9   72.95   68.89
  -4   4   9   58.24   25.81
  -4  -4   9   61.63   35.98
  -4  -4   9   46.85   21.71
   4   4  -8 1242.53   64.46
   4   4  -8 1222.90   56.57
  -4   4   8 1266.76  145.99
  -4   4   8 1018.37   70.46
  -4  -4   8 1313.69   92.40
  -4  -4   8 1228.91   69.22
   4   4  -7  163.41   37.79
   4   4  -7  172.89   20.36
  -4   4   7  201.23   80.16
  -4   4   7  149.32   31.44
  -4  -4   7  139.53   41.82
  -4  -4   7  161.15   39.05
   4   4  -6  920.81   71.57
   4   4  -6  948.60   52.61
   4   4  -6  934.76   50.91
   4   4  -6  934.58   51.17
  -4   4   6  895.74   84.89
  -4  -4   6 1107.28   77.99
  -4  -4   6 1190.61   56.86
  -4  -4   6 1103.33   76.43
   4   4  -514785.90  720.40
   4   4  -514629.31  704.11
   4   4  -514260.27  697.17
  -4   4   514665.41  765.48
  -4   4   513448.01  691.20
   4  -4  -513082.27  681.34
  -4  -4   514126.01  699.58
  -4  -4   514327.98  707.96
  -4  -4   514016.85  712.71
  -4  -4   512127.96  609.01
   4   4  -4 5765.64  264.61
  -4   4   4 5661.84  262.01
   4   4  -4 6129.55  272.27
   4   4  -4 5856.72  263.30
  -4   4   4 5790.61  300.22
  -4   4   4 6133.91  299.72
   4  -4  -4 6101.40  303.78
  -4  -4   4 6045.11  290.02
  -4  -4   4 6221.53  271.35
  -4  -4   4 6214.72  286.05
   4  -4  -4 5837.79  256.46
  -4  -4   4 5804.29  264.09
   4   4  -3 2880.31  135.98
  -4   4   3 2845.33  147.41
   4   4  -3 2749.45  123.91
   4   4  -3 2820.86  126.27
  -4   4   3 2971.68  212.35
  -4   4   3 2869.59  148.66
   4  -4  -3 2870.84  157.58
  -4  -4   3 3058.51  148.04
  -4  -4   3 3024.02  149.85
  -4  -4   3 3072.62  143.72
   4  -4  -3 3117.20  137.22
  -4  -4   3 2934.50  152.74
  -4   4   2  523.55   60.83
   4   4  -2  507.74   36.09
   4   4  -2  556.17   39.79
   4   4  -2  518.66   44.40
  -4   4   2  500.04   63.37
  -4   4   2  507.44   33.60
   4  -4  -2  555.28   41.30
  -4  -4   2  599.02   39.18
  -4  -4   2  562.94   71.30
   4  -4  -2  567.99   59.95
  -4  -4   2  547.29   39.14
  -4   4   1 1479.83  102.02
   4   4  -1 1631.63   78.20
   4   4  -1 1506.88  113.70
   4   4  -1 1515.60   74.92
  -4   4   1 1513.75   84.95
  -4   4   1 1551.10   67.01
   4  -4  -1 1560.20  115.15
   4  -4  -1 1527.28   62.43
   4  -4  -1 1540.84  139.52
  -4  -4   1 1519.77   72.84
  -4  -4   1 1632.16   77.35
  -4  -4   1 1681.38   90.09
  -4  -4   1 1653.92  101.30
   4   4   0 6881.16  346.17
  -4   4   0 6978.45  336.10
   4   4   0 6245.57  311.36
   4   4   0 6534.79  326.22
  -4   4   0 6657.28  384.93
  -4   4   0 6866.38  288.36
   4  -4   0 6758.02  338.17
  -4  -4   0 6140.24  288.05
  -4  -4   0 7118.97  339.94
  -4  -4   0 7152.62  330.27
   4  -4   0 6674.88  322.31
  -4  -4   0 6675.25  304.88
  -4   4  -1 4357.37  219.10
   4   4   1 4735.50  214.12
   4   4   1 4597.30  202.92
   4   4   1 4522.79  204.96
  -4   4  -1 4319.94  226.06
   4  -4   1 4143.54  208.43
   4  -4   1 4138.17  215.97
  -4  -4  -1 4389.07  195.66
  -4  -4  -1 4354.58  203.25
  -4  -4  -1 4239.53  195.32
  -4   4  -2 1307.77  133.33
  -4   4  -2 1365.75   92.25
   4   4   2 1250.99   69.55
   4   4   2 1363.19   72.54
   4   4   2 1314.21   72.65
   4   4   2 1461.38   77.44
   4  -4   2 1420.97   92.10
   4  -4   2 1479.26   93.36
  -4  -4  -2 1512.80   75.57
  -4  -4  -2 1492.96   78.22
   4   4   3  769.73   40.51
   4   4   3  688.80   39.52
  -4   4  -3  755.98  107.13
   4   4   3  753.79   51.21
  -4   4  -3  810.25   72.15
  -4   4  -3  712.37   37.49
   4  -4   3  606.10   28.23
  -4  -4  -3  641.85   47.11
   4   4   4 4954.24  224.86
   4   4   4 4997.79  233.10
  -4   4  -4 3776.74  166.58
   4   4   4 4969.30  222.37
   4   4   4 4912.66  234.22
  -4   4  -4 5020.14  264.40
  -4   4  -4 5022.26  267.13
  -4  -4  -4 5141.81  233.40
   4  -4   4 4641.67  198.35
  -4   4  -5  996.38   49.35
   4   4   5 1241.73   69.75
   4   4   5 1242.92   62.09
   4   4   5 1174.08   74.87
  -4   4  -5 1204.98   98.76
  -4  -4  -5 1210.24   73.73
   4  -4   5 1194.43   79.08
  -4   4  -6 3297.06  149.02
   4   4   6 3935.22  217.47
   4   4   6 3547.03  163.27
   4   4   6 3910.53  195.41
  -4   4  -6 3854.28  219.74
  -4  -4  -6 3655.83  217.57
   4  -4   6 3750.44  192.41
  -4   4  -7  426.51   97.47
   4   4   7  396.56   69.73
   4   4   7  395.25   46.60
  -4   4  -7  313.81   29.12
   4  -4   7  388.55   69.55
  -4  -4  -7  351.36   48.18
  -4   4  -8   92.82   37.61
   4   4   8   62.90   26.92
   4   4   8   49.22   45.72
  -4   4  -8   29.02   15.56
   4  -4   8   27.89   27.06
  -4  -4  -8   30.99   29.71
  -4   4  -9 2138.67  135.84
   4   4   9 2091.02  123.07
   4   4   9 2016.68  118.00
   4  -4   9 2041.82  118.14
  -4  -4  -9 2066.58  153.59
  -4   4 -10  436.56   84.30
   4   4  10  511.44   56.19
   4   4  10  491.39   52.31
  -4   4 -10  653.28   56.17
   4  -4  10  492.08   76.59
  -4  -4 -10  504.98   46.92
  -4   4 -11  284.59   40.90
   4   4  11  348.30   69.93
   4   4  11  319.47   41.32
  -4   4 -11  331.48   26.48
   4  -4  11  242.48   34.62
  -4  -4 -11  241.67   34.87
   4   4  12 2172.06  112.92
   4   4  12 2095.80  106.23
  -4  -4 -12 1756.13   97.07
   4   5 -14  617.49   40.95
  -4   5  14  653.84   71.48
   4  -5 -14  498.38   50.53
  -4  -5  14  772.05   58.09
   4   5 -13  107.11   23.11
  -4   5  13  111.39   45.29
   4  -5 -13   66.80   24.74
  -4  -5  13  107.73   59.16
   4   5 -12   28.58   32.90
  -4   5  12   47.48   39.13
   4  -5 -12   29.27   25.16
  -4  -5  12   48.40   53.51
   4   5 -11 2507.84  149.10
  -4   5  11 2452.81  162.96
  -4  -5  11 2429.56  150.51
   4   5 -10  943.58   85.06
  -4   5  10  911.01   98.62
  -4   5  10  945.68   69.74
  -4  -5  10 1169.98   91.51
   4   5  -9 4120.62  222.47
  -4   5   9 4073.04  242.32
  -4   5   9 4086.09  207.29
  -4  -5   9 4207.82  232.29
   4   5  -8 1745.07  114.96
  -4   5   8 1648.34  124.13
  -4   5   8 1528.61   97.25
  -4  -5   8 1495.37  108.64
   4   5  -7   63.80   23.07
   4   5  -7   71.41   22.82
  -4   5   7   67.97   41.07
  -4   5   7   54.84   29.19
  -4  -5   7   91.44   36.23
   4   5  -6 1655.48   83.70
   4   5  -6 1710.55   95.96
  -4   5   6 1615.90  113.14
  -4   5   6 1525.99  117.13
  -4  -5   6 1510.23   98.29
  -4  -5   6 1410.19   67.72
   4   5  -5  280.73   30.75
   4   5  -5  252.53   43.71
   4   5  -5  234.11   19.52
  -4   5   5  263.02   50.37
  -4   5   5  258.81   50.91
  -4  -5   5  203.89   40.57
  -4  -5   5  181.78   30.76
   4   5  -4 2518.54  117.19
   4   5  -4 2586.01  144.63
   4   5  -4 2303.67  111.45
  -4   5   4 2486.59  190.78
  -4   5   4 2597.32  143.35
  -4  -5   4 2439.90  125.80
  -4  -5   4 2400.17  106.21
  -4   5   3 2555.69  110.67
   4   5  -3 2637.66  144.64
   4   5  -3 2611.07  147.09
   4   5  -3 2464.07  105.48
  -4   5   3 2673.93  149.87
  -4   5   3 2648.02  136.22
  -4  -5   3 2367.30  116.38
   4  -5  -3 2189.54   97.19
  -4  -5   3 2158.80   97.77
  -4   5   2 1849.04   88.28
   4   5  -2 1848.50   91.46
   4   5  -2 1835.92   94.27
   4   5  -2 1768.34   89.83
  -4   5   2 1910.26  115.97
  -4   5   2 1824.46   96.16
  -4  -5   2 1691.91  102.62
   4  -5  -2 1658.66   82.43
  -4  -5   2 1659.94   90.95
  -4   5   1 3299.52  159.25
   4   5  -1 3406.46  157.12
   4   5  -1 3458.50  163.62
   4   5  -1 3407.82  148.32
  -4   5   1 3415.30  182.31
  -4   5   1 3418.70  143.41
  -4  -5   1 3506.93  152.84
   4  -5  -1 3492.87  185.23
  -4  -5   1 3413.91  149.74
  -4   5   0  593.46   60.73
   4   5   0  553.06   47.93
   4   5   0  557.45   34.82
  -4   5   0  537.88   73.57
   4  -5   0  631.25   49.90
  -4  -5   0  665.13   37.68
   4   5   1 2042.05  101.84
   4   5   1 2167.83  109.27
   4   5   1 2065.06   96.62
   4   5   1 2263.41  118.69
  -4   5  -1 2100.35  124.32
  -4   5  -1 2205.58  154.24
   4   5   2   89.05   26.65
   4   5   2   95.46   18.96
  -4   5  -2   89.72   58.41
  -4   5  -2   88.70   37.01
   4   5   3 5904.39  279.16
   4   5   3 6078.67  286.64
  -4   5  -3 5822.23  306.66
  -4   5  -3 6300.60  330.64
  -4  -5  -3 6326.72  293.29
   4   5   4 2381.16  116.59
   4   5   4 2424.11  119.23
  -4   5  -4 2360.27  141.18
  -4   5  -4 2561.83  159.27
  -4  -5  -4 2251.17  118.18
  -4   5  -5  638.13   79.73
   4   5   5  641.82   61.26
   4   5   5  621.79   47.57
   4  -5   5  582.41   51.54
  -4  -5  -5  565.45   53.64
  -4   5  -6 1699.14  181.79
   4   5   6 1585.54   81.60
   4   5   6 1708.23   92.51
   4  -5   6 1674.80   93.74
  -4  -5  -6 1604.71  132.14
  -4   5  -7  829.05   89.98
   4   5   7  753.32   51.59
   4   5   7  765.18   75.79
  -4   5  -7  718.26   39.50
   4  -5   7  792.76   78.48
  -4  -5  -7  740.89   66.52
  -4   5  -8 1069.56   98.98
   4   5   8  945.06   63.05
   4   5   8 1020.60   65.54
  -4   5  -8  938.17   48.81
   4  -5   8 1124.94   70.15
  -4  -5  -8 1122.94   80.42
  -4   5  -9    8.43   30.73
   4   5   9   29.84   29.50
   4   5   9   20.77   17.96
  -4   5  -9    8.02   10.61
   4  -5   9   29.64   16.48
  -4  -5  -9    6.60   39.82
  -4   5 -10 1795.68  121.04
   4   5  10 1669.40   91.94
   4   5  10 1594.91  108.15
  -4   5 -10 1465.16   71.79
   4  -5  10 1320.32   79.38
  -4  -5 -10 1569.10   88.44
   4   5  11  105.54   22.57
   4   5  11  109.72   22.37
  -4   5 -11  106.62   32.57
  -4  -5 -11  131.90   26.78
   4   6 -13 1973.96   96.61
  -4   6  13 1926.25  127.96
   4  -6 -13 1655.96   96.90
  -4  -6  13 1912.59  114.75
   4   6 -12 2568.27  122.68
  -4   6  12 2396.83  149.84
   4  -6 -12 1695.62  114.36
  -4  -6  12 2183.45  178.92
   4   6 -11  443.02   42.41
  -4   6  11  437.84   69.56
  -4  -6  11  526.03   64.69
   4   6 -10  503.43   45.60
  -4   6  10  532.41   72.53
  -4   6  10  491.66   54.77
  -4  -6  10  445.04   63.93
   4   6  -9 1225.49   74.32
  -4   6   9 1255.87  107.45
  -4   6   9 1179.05   84.76
  -4  -6   9 1301.45  101.89
   4   6  -8  526.05   46.54
  -4   6   8  550.06   73.03
  -4   6   8  497.61   57.76
  -4  -6   8  497.42   63.63
   4   6  -7 4627.44  221.81
  -4   6   7 4693.15  263.66
  -4   6   7 4433.88  229.75
  -4  -6   7 5475.94  278.11
   4   6  -6 1349.39   79.21
   4   6  -6 1316.41   65.36
  -4   6   6 1409.67  106.44
  -4   6   6 1388.94  116.58
  -4  -6   6 1384.48   92.86
   4   6  -5  314.81   36.87
   4   6  -5  281.07   27.83
  -4   6   5  318.93   87.14
  -4   6   5  302.96   58.36
  -4  -6   5  172.34   38.53
   4   6  -4 3038.92  176.76
   4   6  -4 3020.26  141.98
  -4   6   4 3075.70  177.39
  -4   6   4 3143.77  174.01
  -4  -6   4 3010.00  150.84
   4   6  -3  281.85   38.08
   4   6  -3  283.46   33.99
  -4   6   3  274.06   50.84
  -4   6   3  248.12   42.89
  -4  -6   3  342.14   48.26
   4   6  -2 4553.43  217.39
   4   6  -2 4716.37  222.41
  -4   6   2 4717.95  246.17
  -4   6   2 4532.31  218.74
  -4  -6   2 4615.61  214.33
   4   6  -1 3370.55  163.89
   4   6  -1 3404.67  167.14
  -4   6   1 3386.00  223.87
  -4   6   1 3398.57  165.10
   4   6   0 6740.94  323.37
   4   6   0 7411.05  389.68
  -4   6   0 7148.24  366.11
  -4   6   0 7231.22  361.79
   4   6   1  567.79   49.74
   4   6   1  567.21   78.96
  -4   6  -1  539.74   56.00
  -4   6  -1  584.92   55.60
   4   6   2 2399.37  127.53
   4   6   2 2590.39  132.45
  -4   6  -2 2545.59  143.12
  -4   6  -2 2672.13  151.92
   4   6   3 1249.74   76.33
  -4   6  -3 1343.55   90.30
  -4   6  -3 1274.98   98.61
  -4  -6  -3 1200.96   77.84
   4   6   4 1928.08  100.23
  -4   6  -4 1848.16  178.09
  -4  -6  -4 1708.10   99.88
   4   6   5   25.01   18.06
  -4   6  -5   43.33   62.99
   4  -6   5   14.23   16.49
  -4  -6  -5   10.76   22.42
   4   6   6  533.98   39.71
  -4   6  -6  658.10   80.02
   4  -6   6  438.70   37.58
  -4  -6  -6  454.16   81.31
   4   6   7  428.38   52.74
   4   6   7  509.52   35.98
  -4   6  -7  611.16   80.65
  -4  -6  -7  546.13   57.11
   4   6   8  118.09   18.65
  -4   6  -8  134.59   51.39
  -4  -6  -8  100.28   36.16
   4   6   9  701.96   42.28
  -4   6  -9  878.60  139.13
  -4  -6  -9  679.83   90.70
  -4   6 -10  416.65   62.33
  -4  -6 -10  419.29   39.98
   4   7 -12  607.61   70.16
  -4   7  12  671.23  112.47
   4  -7 -12  574.38   58.02
  -4  -7  12  699.55   67.22
   4   7 -11 1072.45   63.44
  -4   7  11 1022.45  126.67
   4  -7 -11  640.69   69.50
  -4  -7  11  900.55  121.25
   4   7 -10  777.36   56.59
  -4   7  10  744.88  120.12
  -4   7  10  737.62   68.29
  -4  -7  10  726.84  112.41
   4   7  -9  437.92   44.69
  -4   7   9  426.31  101.87
  -4   7   9  442.43   56.88
  -4  -7   9  535.48   62.27
   4   7  -8 1384.19   84.59
  -4   7   8 1449.49  156.84
  -4   7   8 1467.11   99.07
  -4  -7   8 1754.28  108.26
   4   7  -7  273.60   62.70
  -4   7   7  246.24   86.90
  -4   7   7  257.94   46.50
  -4  -7   7  273.65   45.42
   4   7  -6  370.42   70.25
  -4   7   6  340.37   47.13
  -4  -7   6  423.25   46.81
   4   7  -5  154.98   34.33
   4   7  -5  179.97   34.98
  -4   7   5  163.64   43.20
  -4   7   5  160.37   33.98
  -4  -7   5  148.61   50.90
   4   7  -4  496.47   49.69
   4   7  -4  480.03   55.61
  -4   7   4  495.41   58.74
  -4   7   4  456.55   62.07
  -4  -7   4  538.30   59.92
   4   7  -3 8547.66  418.35
   4   7  -3 8284.19  428.55
  -4   7   3 9073.61  467.23
  -4   7   3 8083.30  398.58
   4   7  -2 1219.43   82.13
   4   7  -2 1223.06  101.50
  -4   7   2 1267.95  119.27
  -4   7   2 1132.87   59.94
   4   7  -1  402.20   74.45
   4   7  -1  431.92   46.24
  -4   7   1  432.11   50.14
   4   7   0  983.72   70.21
   4   7   0 1024.34   71.30
  -4   7   0  990.67   72.47
  -4   7   0  986.50   82.26
   4   7   1 4719.54  233.07
   4   7   1 4885.01  240.30
  -4   7  -1 4767.48  276.92
  -4   7  -1 5138.93  295.69
   4   7   2  205.76   38.74
  -4   7  -2  225.79   34.26
  -4   7  -2  236.65   70.28
   4   7   3 1819.19  137.01
  -4   7  -3 1959.66  125.17
  -4  -7  -3 1670.01   97.71
   4   7   4 1430.65   82.87
  -4   7  -4 1567.38  116.33
  -4  -7  -4 1338.88   83.89
   4   7   5   16.16   19.45
  -4   7  -5   38.27   36.21
   4   7   6  565.35   42.97
  -4   7  -6  600.31   79.96
  -4  -7  -6  675.91   89.52
  -4   7  -7  164.94   54.40
  -4  -7  -7  167.87   37.58
   4   7   8  915.63   61.45
  -4   7  -8 1457.41  170.20
  -4  -7  -8 1513.87   88.32
  -4   7  -9 1474.53  117.02
  -4  -7  -9 1461.34   77.87
   4   8 -11  310.34   34.99
  -4   8  11  319.36   45.61
   4  -8 -11  330.30   46.56
  -4  -8  11  349.62   47.58
   4   8 -10  580.08   47.61
  -4   8  10  579.71   60.81
  -4  -8  10  563.68   58.34
   4   8  -9  261.74   36.65
  -4   8   9  214.20   45.67
  -4   8   9  228.96   46.06
  -4  -8   9  252.90   43.22
   4   8  -8  104.09   29.46
  -4   8   8   92.31   36.51
  -4   8   8   88.77   35.85
  -4  -8   8   87.37   52.80
   4   8  -7 1538.17   89.82
  -4   8   7 1531.54  101.46
  -4   8   7 1413.13   96.33
  -4  -8   7 1477.07  116.76
   4   8  -6  319.49   42.37
  -4   8   6  324.17   47.83
  -4   8   6  322.98   44.87
  -4  -8   6  427.42   58.68
   4   8  -5  852.94   63.31
   4   8  -5  782.79   43.64
  -4   8   5  864.57   69.74
  -4   8   5  790.15   60.04
  -4  -8   5  748.79   50.72
   4   8  -4 1152.09   77.16
   4   8  -4 1179.53   64.38
  -4   8   4 1208.40  111.59
  -4   8   4 1104.39   68.14
   4   8  -3 2413.07  166.36
   4   8  -3 2532.47  121.73
  -4   8   3 2511.34  138.05
  -4   8   3 2203.30  111.37
   4   8  -2  806.27   95.13
   4   8  -2  861.92   57.85
  -4   8   2  790.83   60.78
   4   8  -1  586.61   56.17
   4   8  -1  627.44   51.88
  -4   8   1  564.22   48.08
   4   8   0  146.18   35.22
   4   8   0  152.46   33.31
   4   8   1 1294.70   83.45
   4   8   1 1261.89  114.85
   4   8   2 2184.75  151.91
  -4   8  -2 2187.02  123.80
   4   8   3  437.23   47.13
  -4   8  -3  432.73   52.05
  -4  -8  -3  420.71   48.50
   4   8   4 4112.22  201.77
  -4   8  -4 4104.63  222.88
  -4  -8  -4 3812.57  190.85
   4   8   5 1115.01   69.50
  -4   8  -5 1151.41  134.04
  -4  -8  -5 1127.40  112.17
  -4   8  -6  447.69  113.18
  -4  -8  -6  459.92   51.11
  -4   8  -7 1235.50  106.11
  -4  -8  -7 1289.31   81.47
   4   9  -9  673.09   49.87
   4  -9  -9  591.78   61.07
  -4  -9   9  740.71   47.10
   4   9  -8 1220.73   74.56
  -4   9   8 1314.67  101.65
  -4  -9   8 1194.31   67.77
   4   9  -7  184.46   34.27
  -4   9   7  184.87   30.73
  -4   9   7  177.18   35.73
  -4  -9   7  138.41   23.12
   4   9  -6 1554.35   89.23
  -4   9   6 1561.23   89.29
  -4   9   6 1400.46   84.82
   4   9  -5 1213.20  108.75
  -4   9   5 1171.38   70.51
  -4   9   5 1173.05   70.29
   4   9  -4 2212.32  148.13
   4   9  -4 2136.00  100.14
  -4   9   4 1976.37  102.52
   4   9  -3 2230.12  120.44
   4   9  -3 2301.52  127.42
   4   9  -2  999.17   70.40
   4   9  -2 1026.93   79.88
   4   9  -1  904.25   66.92
   4   9  -1  989.51   61.48
   4   9   0  271.84   39.69
   4   9   0  271.05   35.28
   4   9   1   73.74   27.29
  -4  -9  -1   74.18   29.83
   4   9   2  681.71   56.05
  -4  -9  -2  793.58   59.58
   4   9   3  401.11   43.03
  -4   9  -3  360.72   38.62
  -4  -9  -3  276.76   41.17
   4   9   4  192.45   57.25
  -4   9  -4  205.93   36.99
  -4  -9  -4  165.03   61.32
   4   9   5  389.35   41.92
  -4   9  -5  369.09   47.96
  -4  -9  -5  391.79   45.36
   4  10  -5 1686.27   91.00
   4  10  -4   91.80   28.18
   4  10  -3  665.07   51.23
   4  10  -3  463.78   38.34
   4  10  -2  918.42   62.24
   4  10  -2  948.29   50.04
   4  10  -1   13.72   14.23
  -4 -10   1   27.40   22.03
   4  10   0 1111.83   63.86
  -4 -10   0 1228.05   74.47
   4  10   1  193.98   50.01
  -4 -10  -1  237.13   34.82
   4  10   2  651.42   72.11
  -4 -10  -2  634.86   49.57
  -5   0  16 6042.51  308.47
  -5   0  15  577.59   63.22
  -5   0  14   56.28   35.02
  -5   0  13  285.68   50.98
   5   0 -12  504.09   35.90
  -5   0  12  675.48  102.09
   5   0 -11 1797.29   92.47
  -5   0  11 1788.28  154.37
   5   0 -10  859.15   53.30
  -5   0  10  806.91   62.00
  -5   0  10  825.84   50.98
  -5   0  10  921.23  106.93
   5   0  -9  150.77   18.14
   5   0  -9  159.63   47.81
  -5   0   9  208.51   36.26
  -5   0   9  154.60   25.75
  -5   0   9  206.22   63.44
   5   0  -8 1544.95   85.04
   5   0  -8 1574.55  110.40
   5   0  -8 1559.45   76.81
  -5   0   8 1606.86   98.19
  -5   0   8 1578.82   84.19
  -5   0   8 1624.90   89.77
  -5   0   8 1494.58  128.52
   5   0  -7 2068.77   92.40
   5   0  -7 2156.22  137.28
   5   0  -7 2180.39  127.10
   5   0  -7 2231.29  114.88
  -5   0   7 2142.43  102.34
  -5   0   7 2131.14  110.06
  -5   0   7 2143.19  116.52
  -5   0   7 2170.83  117.25
   5   0  -6  733.19   62.64
   5   0  -6  801.14   87.13
   5   0  -6  885.06   55.48
   5   0  -6  848.22   60.77
  -5   0   6  878.55   52.79
  -5   0   6  791.22   61.25
  -5   0   6  911.80   66.51
   5   0  -528771.13 1581.40
   5   0  -529514.01 1663.47
   5   0  -530108.96 1638.65
   5   0  -531841.06 1743.53
  -5   0   528571.23 1614.69
  -5   0   529422.20 1683.76
  -5   0   528303.61 1628.75
  -5   0   531790.91 1750.25
   5   0  -4 2019.52   95.96
   5   0  -4 2127.58  143.29
   5   0  -4 1991.82   96.93
   5   0  -4 2192.72  111.95
  -5   0   4 1971.04   97.81
  -5   0   4 2076.49  159.89
  -5   0   4 1809.54  131.30
  -5   0   4 1910.31  144.96
   5   0  -312939.91  662.43
   5   0  -312902.91  656.49
   5   0  -313238.55  641.91
   5   0  -313779.36  678.51
  -5   0   313599.10  665.01
  -5   0   313544.99  679.69
  -5   0   313321.16  659.12
   5   0  -217420.26  873.80
   5   0  -217009.96  870.47
   5   0  -216804.84  829.12
   5   0  -215029.18  769.79
  -5   0   217063.65  859.64
  -5   0   216080.23  828.25
  -5   0   215222.49  823.79
   5   0  -1 7591.29  402.82
   5   0  -1 7569.13  373.01
   5   0  -1 8012.58  361.22
   5   0  -1 8063.72  431.29
  -5   0   1 7996.46  382.12
  -5   0   1 7502.09  419.95
  -5   0   1 7589.37  303.43
  -5   0   1 7657.66  305.07
  -5   0   1 7483.90  357.93
   5   0   019399.20 1010.21
   5   0   018250.89 1000.60
   5   0   018792.52  945.73
   5   0   019710.36 1011.95
  -5   0   018002.61  950.21
  -5   0   017630.15  920.18
  -5   0   017852.55  851.35
  -5   0   018842.05  896.00
  -5   0   018172.16  977.81
   5   0   1  184.50   65.46
   5   0   1  200.17   36.86
   5   0   1  180.40   27.43
   5   0   1  168.35   35.76
  -5   0  -1  183.08   42.14
  -5   0  -1  180.51   36.04
  -5   0  -1  179.28   13.71
  -5   0  -1  190.92   20.56
  -5   0  -1  319.33   36.11
   5   0   2 1428.98  133.53
   5   0   2 1443.41   82.49
   5   0   2 1391.74   54.09
  -5   0  -2 1498.31   84.60
  -5   0  -2 1507.06   60.94
  -5   0  -2 1509.59   70.28
  -5   0  -2 1557.58   86.83
   5   0   3 4546.06  216.62
   5   0   3 4096.23  217.31
   5   0   3 4331.40  203.06
   5   0   3 4224.27  205.57
  -5   0  -3 4436.77  207.95
  -5   0  -3 4479.85  198.47
  -5   0  -3 4324.16  180.42
   5   0   4 6716.89  324.08
   5   0   4 6093.66  291.33
   5   0   4 7052.12  334.92
  -5   0  -4 6383.45  305.17
  -5   0  -4 6754.73  293.91
  -5   0  -4 6336.33  282.58
   5   0   5   12.47   26.85
   5   0   5   11.06   38.19
  -5   0  -5   28.61   15.88
  -5   0  -5   22.75   12.21
   5   0   6  708.85   71.04
   5   0   6  758.75   62.20
  -5   0  -6  736.24   61.93
  -5   0  -6  707.21   43.24
   5   0   7   52.75   37.22
   5   0   7   59.53   29.99
  -5   0  -7   50.08   17.81
   5   0   8  202.86   50.87
   5   0   8  191.97   64.92
  -5   0  -8  190.98   42.85
   5   0   9 1025.14  144.76
   5   0   9  987.26   74.79
  -5   0  -9  986.69   58.85
   5   0  10 1912.24  129.54
   5   0  10 1836.63  110.98
  -5   0 -10 1845.93   92.32
   5   0  11  466.55   63.25
   5   0  11  424.38   74.87
  -5   0 -11  434.97   35.55
   5   0  12  591.68  104.07
   5   0  12  518.06   46.20
  -5   0 -12  562.51   38.07
  -5   1  16  525.45   56.22
  -5  -1  16  493.99   56.88
  -5   1  15 4193.39  216.82
  -5  -1  15 3732.35  206.32
  -5   1  14 1264.56   90.89
  -5  -1  14 1158.66   90.61
  -5   1  13  279.57   33.70
  -5   1  13  305.72   76.08
  -5  -1  13  194.23   48.94
  -5   1  12  265.74   51.28
  -5   1  12  298.64   71.03
   5  -1 -12  206.34   25.29
  -5  -1  12  163.59   26.00
  -5  -1  12  219.34   46.57
   5   1 -11  467.93   48.35
  -5   1  11  633.14   72.49
  -5   1  11  607.22   87.60
   5  -1 -11  543.95   63.97
  -5  -1  11  534.87   44.84
  -5  -1  11  542.82   61.90
   5   1 -10 2021.88  101.53
  -5   1  10 2204.33  144.81
  -5   1  10 1921.88  148.81
   5  -1 -10 2389.42  121.61
  -5  -1  10 2338.08  120.53
  -5  -1  10 2410.27  137.55
  -5   1   9  221.09   57.54
   5   1  -9  247.70   28.87
  -5   1   9  249.62   51.26
  -5   1   9  219.47   22.47
  -5   1   9  226.27   22.93
  -5  -1   9  215.81   34.64
   5  -1  -9  219.22   35.12
  -5  -1   9  188.01   42.89
   5   1  -8 4426.08  215.95
  -5   1   8 4414.59  206.86
   5   1  -8 4383.51  206.61
  -5   1   8 4204.62  240.40
  -5   1   8 4379.90  242.32
  -5   1   8 4322.33  199.37
   5  -1  -8 4419.59  204.14
   5  -1  -8 4671.23  222.45
  -5  -1   8 4380.66  220.94
  -5  -1   8 4954.49  279.62
  -5   1   7 6664.42  312.43
  -5   1   7 6528.30  311.56
   5   1  -7 6377.21  296.43
  -5   1   7 6273.52  288.74
   5   1  -7 6991.21  308.13
   5   1  -7 6129.95  295.21
  -5   1   7 5664.49  274.40
   5  -1  -7 5417.48  260.69
   5  -1  -7 6435.99  304.94
   5  -1  -7 6187.60  282.60
  -5  -1   7 6291.46  317.28
  -5  -1   7 6168.01  299.99
  -5  -1   7 6643.35  319.18
   5  -1  -7 6218.68  287.48
   5   1  -6 5770.77  238.04
  -5   1   6 5904.91  290.57
   5   1  -6 5490.71  226.35
  -5   1   6 6627.81  302.64
   5   1  -6 6253.68  285.56
   5   1  -6 6662.07  291.13
   5   1  -6 6718.52  346.77
  -5   1   6 6434.68  300.99
  -5   1   6 6139.37  281.67
   5  -1  -6 5299.45  244.34
   5  -1  -6 5719.18  263.36
  -5  -1   6 4675.20  217.46
  -5  -1   6 5637.13  275.07
  -5  -1   6 5478.14  284.10
   5  -1  -6 5445.05  257.40
  -5  -1   6 5113.98  210.58
   5  -1  -6 5711.25  270.23
  -5  -1   6 6280.40  299.56
   5   1  -5 5337.50  232.63
  -5   1   5 5019.89  260.10
   5   1  -5 5005.20  196.98
  -5   1   5 5855.41  275.54
   5   1  -5 5560.82  257.21
  -5   1   5 5873.81  267.14
   5   1  -5 6005.40  294.87
   5   1  -5 5544.41  261.99
  -5   1   5 5344.31  252.84
   5  -1  -5 5253.66  247.36
  -5  -1   5 5137.43  217.60
   5  -1  -5 5464.31  275.77
   5  -1  -5 5586.26  258.99
   5  -1  -5 5177.62  268.15
  -5  -1   5 5325.75  346.45
  -5  -1   5 5277.50  214.36
  -5  -1   5 5004.60  246.87
  -5  -1   5 5353.73  262.72
   5   1  -4 5344.59  229.46
   5   1  -4 5801.28  267.46
  -5   1   4 4747.43  251.85
   5   1  -4 5014.78  198.73
  -5   1   4 5492.62  298.00
   5   1  -4 5524.39  251.80
   5   1  -4 6023.05  261.62
  -5   1   4 5316.52  251.00
   5  -1  -4 4458.16  218.64
   5  -1  -4 4846.10  221.75
   5  -1  -4 4807.53  222.29
  -5  -1   4 4639.07  234.40
  -5  -1   4 4484.78  205.44
  -5  -1   4 4417.81  254.99
  -5  -1   4 4708.81  180.56
   5  -1  -4 4644.40  228.96
  -5  -1   4 4702.35  231.00
   5   1  -3  297.34   22.64
   5   1  -3  367.71   45.49
  -5   1   3  326.23   34.17
   5   1  -3  304.77   38.71
   5   1  -3  328.03   35.08
  -5   1   3  307.50   44.27
  -5   1   3  277.86   73.42
   5  -1  -3  233.22   32.41
   5  -1  -3  234.21   53.80
   5  -1  -3  245.31   66.76
  -5  -1   3  249.63   23.43
  -5  -1   3  197.94   76.85
  -5  -1   3  240.76   60.85
  -5  -1   3  232.41   11.99
  -5  -1   3  198.92   41.95
   5  -1  -3  304.31   46.02
   5   1  -2 2008.84   90.86
  -5   1   2 1967.03  157.14
   5   1  -2 1915.51  111.77
  -5   1   2 1994.48  118.22
   5   1  -2 1925.36  134.32
  -5   1   2 1866.58  130.62
   5  -1  -2 2237.13  171.57
   5  -1  -2 2276.54  123.54
  -5  -1   2 2102.42  118.72
   5  -1  -2 2184.47  124.08
  -5  -1   2 2293.79   81.26
  -5  -1   2 1964.23  156.65
   5  -1  -2 2122.55  107.82
   5   1  -117348.37  881.43
   5   1  -118064.10  936.68
   5   1  -115891.33  837.14
   5   1  -118254.99  918.71
  -5   1   118141.65  950.51
  -5   1   118581.85  964.07
  -5   1   117514.92  885.43
   5  -1  -117612.74  973.72
   5  -1  -118121.73  943.01
   5  -1  -118377.41  959.79
   5  -1  -118721.40  927.56
  -5  -1   118240.93  928.34
  -5  -1   118453.09  947.68
  -5  -1   119181.49  910.54
  -5  -1   118686.82  955.95
   5   1   0  524.86   39.96
  -5   1   0  383.80   16.34
   5   1   0  433.81   46.36
  -5   1   0  412.59   14.46
  -5   1   0  453.22   59.31
   5   1   0  456.09   34.04
   5   1   0  481.75   52.69
  -5   1   0  420.06   55.25
  -5   1   0  441.44   53.32
   5  -1   0  403.12   53.20
   5  -1   0  389.63   52.29
  -5  -1   0  386.04   71.86
  -5  -1   0  400.50   21.77
   5  -1   0  426.17   39.51
  -5  -1   0  405.89   30.37
  -5  -1   0  426.71   40.55
  -5  -1   0  414.91   81.94
   5  -1   0  383.98   25.32
   5   1   1 1815.40   89.20
   5   1   1 1970.69  111.62
   5   1   1 1958.53  130.96
   5   1   1 1821.89   96.99
  -5   1  -1 1681.62   66.64
  -5   1  -1 1877.08   93.51
   5   1   1 1835.32   79.88
  -5   1  -1 1872.27  110.15
  -5   1  -1 2001.49  124.68
  -5   1  -1 1824.47   66.52
   5  -1   1 2279.00  121.31
  -5  -1  -1 2284.77  109.77
   5  -1   1 2185.12  104.76
   5  -1   1 2229.34  127.26
  -5  -1  -1 2096.95   82.44
  -5  -1  -1 2182.62   84.78
  -5  -1  -1 2232.86   94.61
  -5  -1  -1 2121.88  112.60
   5  -1   1 2061.85   80.39
   5   1   2 4242.04  193.72
  -5   1  -2 4425.64  173.97
   5   1   2 4136.43  202.60
   5   1   2 4149.99  192.26
  -5   1  -2 4203.07  207.22
   5   1   2 4501.90  184.12
  -5   1  -2 4115.04  162.82
   5   1   2 4519.37  257.79
  -5   1  -2 4257.41  226.67
  -5  -1  -2 4138.83  214.28
   5  -1   2 4300.51  211.05
  -5  -1  -2 4195.40  188.02
   5  -1   2 4288.50  196.71
  -5  -1  -2 4127.19  172.44
   5  -1   2 4263.72  224.02
  -5  -1  -2 4371.49  181.59
  -5  -1  -2 4345.18  209.47
   5   1   3 5085.59  236.37
  -5   1  -3 4737.76  197.43
   5   1   3 5064.13  249.30
   5   1   3 4900.21  242.83
  -5   1  -3 5141.69  286.86
   5   1   3 4588.05  189.50
   5   1   3 4766.17  235.60
   5   1   3 5607.32  266.99
  -5   1  -3 4815.24  199.42
   5  -1   3 5096.97  235.50
   5  -1   3 5079.67  244.24
  -5  -1  -3 4997.77  214.13
  -5  -1  -3 5187.51  235.99
  -5  -1  -3 5028.91  228.78
   5  -1   3 4649.43  298.89
   5   1   4 1541.45  114.05
  -5   1  -4 1527.29   88.28
   5   1   4 1386.76   81.23
  -5   1  -4 1407.99   60.81
   5   1   4 1327.74   88.49
  -5   1  -4 1303.79   58.21
  -5  -1  -4 1530.40   87.71
   5  -1   4 1548.21   96.02
  -5  -1  -4 1538.11   72.02
   5  -1   4 1610.35  114.02
  -5  -1  -4 1593.45   86.07
   5  -1   4 1588.43   83.22
  -5   1  -5 3665.71  169.43
   5   1   5 3856.42  196.33
   5   1   5 3891.65  238.91
  -5   1  -5 3896.78  190.61
   5  -1   5 3623.56  176.00
  -5  -1  -5 3652.08  184.74
   5  -1   5 3677.20  192.74
  -5   1  -6  254.06   37.47
   5   1   6  288.33   48.37
   5   1   6  284.82   47.26
  -5   1  -6  291.04   58.10
   5  -1   6  309.77   37.15
  -5  -1  -6  322.32   28.91
   5  -1   6  381.81   85.26
   5   1   7 1314.16   94.10
  -5   1  -7 1264.23   74.27
   5   1   7 1303.50   92.99
  -5   1  -7 1242.35   64.07
   5  -1   7 1172.58   96.35
  -5  -1  -7 1233.80   69.54
   5  -1   7 1194.30  102.96
   5   1   8  319.76   92.99
   5   1   8  285.88   81.39
  -5   1  -8  257.55   27.49
   5  -1   8  362.14   57.94
   5  -1   8  341.54   39.66
  -5  -1  -8  348.25   34.57
   5   1   9  124.78   45.13
   5   1   9  103.54   39.48
  -5   1  -9  112.34   20.95
   5  -1   9  140.07   45.10
   5  -1   9  133.59   29.52
  -5  -1  -9  129.84   41.14
   5   1  10 1014.37   89.61
   5   1  10  933.86   76.73
  -5   1 -10  939.03   69.52
   5  -1  10  998.29   89.02
   5  -1  10  923.27   88.43
  -5  -1 -10  913.79   59.11
   5   1  11  768.30  112.46
   5   1  11  663.69   94.99
  -5   1 -11  737.43   44.49
   5  -1  11  722.87   72.12
   5  -1  11  644.45   48.02
  -5  -1 -11  676.74   48.14
   5   1  12  941.41   76.40
   5   1  12  868.06   62.96
  -5   1 -12  710.90   45.08
   5  -1  12  938.38  112.50
   5  -1  12  769.35   60.99
  -5  -1 -12  900.91   70.34
  -5   2  16 1131.42   71.15
  -5  -2  16  933.47  101.19
  -5   2  15  397.78   40.49
  -5   2  15  391.86   46.59
  -5  -2  15  330.02   48.26
  -5   2  14   46.32   25.28
  -5   2  14   56.68   27.38
  -5  -2  14   36.15   30.97
  -5   2  13  594.32   57.14
  -5   2  13  643.01   57.94
   5  -2 -13  605.11   41.63
  -5  -2  13  630.36   47.59
  -5  -2  13  645.00   64.67
  -5   2  12  656.99   90.42
  -5   2  12  609.39   85.73
   5  -2 -12  654.88   69.46
  -5  -2  12  642.37   53.31
  -5  -2  12  569.50   64.38
  -5   2  11  485.20   78.19
  -5   2  11  428.12   71.37
   5  -2 -11  298.90   41.96
  -5  -2  11  304.04   43.16
  -5  -2  11  322.16   50.56
   5   2 -10 6759.54  329.06
  -5   2  10 7914.83  450.42
   5  -2 -10 8645.20  429.79
  -5  -2  10 8652.69  470.10
  -5  -2  10 9025.86  450.86
   5   2  -9 1191.94   53.18
   5   2  -9 1178.88   67.84
  -5   2   9 1317.60  126.15
  -5   2   9 1290.85  103.42
   5  -2  -9 1634.13   94.46
  -5  -2   9 1713.73  133.70
  -5  -2   9 1806.18  101.67
   5   2  -8 1682.72   69.48
  -5   2   8 1691.54  113.44
   5   2  -8 1776.00  112.39
  -5   2   8 1703.47  139.38
  -5  -2   8 1779.66  141.41
  -5  -2   8 1645.99   70.96
  -5  -2   8 1647.82   99.72
   5  -2  -8 1778.30  104.04
   5   2  -7 1340.09   64.17
  -5   2   7 1374.73   91.55
   5   2  -7 1365.24  100.82
   5   2  -7 1321.88   80.43
   5   2  -7 1478.74   71.22
  -5   2   7 1384.01   83.19
  -5   2   7 1367.79   73.30
  -5   2   7 1250.33   81.35
   5  -2  -7 1313.14   97.69
   5  -2  -7 1393.10   72.57
  -5  -2   7 1622.21  144.58
  -5  -2   7 1361.52   57.36
  -5  -2   7 1389.05   86.23
   5  -2  -7 1427.70   86.69
  -5   2   6 1700.37   89.65
   5   2  -6 1685.83   76.11
  -5   2   6 1722.51   82.92
   5   2  -6 1653.97  117.00
  -5   2   6 1779.60  104.86
   5   2  -6 1704.85  107.83
   5   2  -6 1922.46  130.44
  -5   2   6 1747.58  102.92
   5  -2  -6 1544.57   92.72
  -5  -2   6 1565.35  139.77
   5  -2  -6 1524.32   79.74
  -5  -2   6 1577.16  108.73
   5  -2  -6 1426.58   72.15
  -5  -2   6 1626.33   63.75
  -5  -2   6 1483.12   91.38
   5  -2  -6 1600.87   92.95
   5   2  -5 1284.06   75.07
   5   2  -5 1233.63   48.55
   5   2  -5 1246.14  101.66
   5   2  -5 1413.27   70.94
  -5   2   5 1181.66   58.81
  -5   2   5 1317.86   84.56
  -5   2   5 1277.30   90.74
   5  -2  -5  868.61   64.57
   5  -2  -5  868.53   50.02
  -5  -2   5  876.96   73.53
  -5  -2   5  857.92   82.14
  -5  -2   5  896.11   38.22
   5  -2  -5  905.95  103.99
  -5  -2   5  901.11  101.19
   5   2  -4  653.49   52.03
  -5   2   4  586.65   36.15
   5   2  -4  646.27   37.34
   5   2  -4  626.06   48.82
   5   2  -4  645.00   45.37
  -5   2   4  621.45   47.97
  -5   2   4  642.18   93.21
   5  -2  -4  393.64   41.23
   5  -2  -4  393.09   52.56
  -5  -2   4  380.33   51.91
   5  -2  -4  379.60   46.30
  -5  -2   4  352.25   98.72
  -5  -2   4  385.41   20.81
  -5  -2   4  373.01   48.14
   5  -2  -4  395.66   43.51
   5   2  -3  500.61   56.52
  -5   2   3  476.62   60.56
   5   2  -3  509.77   26.80
  -5   2   3  554.89   50.78
   5   2  -3  527.08   48.54
  -5   2   3  450.88   32.14
   5  -2  -3  485.42   32.01
   5  -2  -3  524.93   80.09
  -5  -2   3  527.31   53.80
   5  -2  -3  531.96   41.98
  -5  -2   3  481.76   68.11
  -5  -2   3  518.87   33.84
   5  -2  -3  514.69   57.13
  -5  -2   3  439.97   50.33
   5   2  -210047.83  438.69
   5   2  -210152.41  458.77
  -5   2   210889.02  504.66
  -5   2   211645.23  580.78
   5   2  -210497.53  483.54
  -5   2   211201.96  548.60
   5   2  -211206.57  534.03
   5   2  -211192.58  543.44
   5  -2  -211095.77  525.62
   5  -2  -210612.66  525.08
  -5  -2   210240.45  543.27
   5  -2  -211109.43  515.06
  -5  -2   210833.19  481.94
  -5  -2   210769.09  518.85
  -5  -2   210107.91  541.30
   5  -2  -210499.24  532.15
   5   2  -1 5446.67  220.56
   5   2  -1 5696.31  235.79
   5   2  -1 5635.65  247.48
  -5   2   1 5264.13  325.25
  -5   2   1 5766.71  323.69
   5   2  -1 5971.61  297.84
   5   2  -1 6210.17  336.92
  -5   2   1 5427.30  238.98
   5  -2  -1 5515.24  279.14
   5  -2  -1 5271.22  228.41
  -5  -2   1 5278.11  250.91
   5  -2  -1 5332.75  227.75
  -5  -2   1 5292.81  233.52
  -5  -2   1 5416.23  249.55
  -5  -2   1 4970.53  245.96
   5  -2  -1 5381.89  266.96
   5   2   0 8250.77  362.67
   5   2   0 8604.88  380.24
   5   2   0 8238.66  376.27
  -5   2   0 8648.53  438.73
  -5   2   0 8503.89  420.46
   5   2   0 8455.66  389.07
   5   2   0 9217.62  443.67
  -5   2   0 8143.82  367.12
   5  -2   0 8574.47  486.50
   5  -2   0 8862.70  415.24
  -5  -2   0 8452.66  397.41
   5  -2   0 8930.26  389.27
  -5  -2   0 8478.46  372.69
  -5  -2   0 8708.91  403.04
  -5  -2   0 9113.37  476.11
   5  -2   0 8665.55  427.36
   5   2   110733.26  508.44
  -5   2  -1 9826.69  564.90
   5   2   110653.26  507.39
  -5   2  -110572.16  529.62
   5   2   110975.39  508.19
   5   2   112092.71  584.44
   5  -2   110044.45  475.92
   5  -2   110048.45  521.40
  -5  -2  -110302.47  490.95
   5  -2   110905.49  586.14
  -5  -2  -110545.75  480.55
  -5  -2  -110190.34  483.27
  -5  -2  -110333.83  487.54
  -5  -2  -111017.90  534.43
   5   2   2 2903.98  149.76
   5   2   2 2554.92  178.59
   5   2   2 2807.57  133.10
   5   2   2 2943.20  130.01
   5   2   2 2904.04  135.75
  -5   2  -2 3184.99  176.71
   5  -2   2 4327.05  240.66
   5  -2   2 2790.36  124.32
   5  -2   2 2613.51  156.39
  -5  -2  -2 2656.98  136.18
  -5  -2  -2 2717.18  115.99
  -5  -2  -2 2684.60  115.85
  -5  -2  -2 2732.78  119.41
  -5  -2  -2 2671.31  140.27
   5   2   3  476.69   38.78
   5   2   3  459.29   40.92
   5   2   3  435.67   27.58
  -5   2  -3  458.02   53.76
   5   2   3  469.65   27.18
   5   2   3  452.19   51.40
  -5   2  -3  423.16   65.25
  -5   2  -3  418.06   20.56
  -5   2  -3  385.42   26.43
   5  -2   3  513.63   34.29
   5  -2   3  555.51   83.54
  -5  -2  -3  594.07   32.01
  -5  -2  -3  556.43   33.68
  -5  -2  -3  567.07   52.23
  -5  -2  -3  584.45   30.88
  -5   2  -4 1320.44   54.95
   5   2   4 1426.46   79.18
   5   2   4 1451.83   91.71
  -5   2  -4 1389.42   89.06
  -5   2  -4 1235.90   60.61
   5  -2   4 1286.01   65.81
  -5  -2  -4 1349.42   69.44
   5  -2   4 1363.16   90.87
  -5   2  -5  187.43   16.43
   5   2   5  144.93   32.04
   5   2   5  128.38   67.15
  -5   2  -5  132.83   60.40
   5  -2   5  124.47   22.21
  -5  -2  -5  129.48   27.45
   5  -2   5  147.02   40.74
  -5   2  -6   41.28   12.36
   5   2   6   41.83   44.90
   5   2   6   69.07   32.08
  -5   2  -6   73.06   28.51
   5  -2   6   22.80   29.19
  -5  -2  -6   34.11   23.78
   5  -2   6   60.34   33.16
  -5   2  -7  135.76   18.98
   5   2   7  160.10   71.19
   5   2   7  131.21   42.23
  -5   2  -7  140.43   33.80
   5  -2   7  202.43   25.33
  -5  -2  -7  198.99   53.30
   5  -2   7  194.07   81.57
  -5   2  -8 1648.28   95.07
   5   2   8 1772.27  114.85
   5   2   8 1717.00  160.74
  -5   2  -8 1782.93  132.76
   5  -2   8 1640.09   87.17
  -5  -2  -8 1778.05   95.32
   5  -2   8 1751.77  119.02
   5   2   9 1435.03  104.37
   5   2   9 1346.91   99.47
   5  -2   9 1549.33  108.42
   5  -2   9 1313.94   91.28
  -5  -2  -9 1474.25   83.38
   5   2  10  214.73   76.40
   5   2  10  223.18   45.45
   5  -2  10  264.42   84.22
   5  -2  10  212.29   25.38
  -5  -2 -10  225.34   49.42
   5   2  11  965.01   76.95
   5   2  11  886.87  105.21
  -5   2 -11  658.99   42.21
   5  -2  11  958.10   74.37
   5  -2  11  625.83   41.51
  -5  -2 -11  856.38   54.23
   5   2  12  237.41   41.82
   5   2  12  193.79   37.91
   5  -2  12  202.58   61.88
  -5  -2 -12  188.36   25.62
  -5   3  15  376.58   45.51
  -5   3  15  368.82   35.31
  -5  -3  15  321.70   65.19
  -5   3  14 1515.90   98.71
  -5   3  14 1489.29   80.79
   5  -3 -14 1135.81   59.16
  -5  -3  14 1277.54   77.87
  -5  -3  14 1263.02  115.35
   5   3 -13 1829.74   93.13
  -5   3  13 2143.50  133.60
  -5   3  13 2135.23  112.39
   5  -3 -13 1859.47  121.06
  -5  -3  13 1876.26  108.99
  -5  -3  13 1886.93  111.78
   5   3 -12  533.80   32.36
  -5   3  12  583.01   47.81
  -5   3  12  601.41   68.78
  -5  -3  12  661.81   58.86
   5  -3 -12  642.30   54.84
  -5  -3  12  659.86   61.33
   5   3 -11  794.86   43.47
  -5   3  11  897.46   81.83
  -5   3  11  836.36   57.76
   5  -3 -11  853.84   70.69
  -5  -3  11  916.87  107.59
  -5  -3  11  886.64   69.59
   5   3 -10 2235.39   99.77
  -5   3  10 2306.25  192.37
  -5   3  10 2211.17  114.70
   5  -3 -10 2006.70  127.76
  -5  -3  10 2222.84  175.38
  -5  -3  10 2181.15  124.52
   5   3  -9 2799.34  121.96
   5   3  -9 2758.54  128.04
  -5   3   9 2798.19  164.58
  -5   3   9 2749.17  133.57
  -5  -3   9 2672.08  198.23
  -5  -3   9 2762.45  146.36
   5   3  -8  661.64   47.45
   5   3  -8  679.26   45.33
  -5   3   8  684.49   70.46
  -5   3   8  614.96   41.32
  -5   3   8  669.66   54.36
  -5  -3   8  640.11   55.09
  -5  -3   8  672.41  101.08
   5   3  -7 1049.50   61.56
   5   3  -7  993.62   59.90
  -5   3   7 1020.67   52.19
  -5   3   7  987.89   81.20
  -5   3   7  993.27   65.85
  -5  -3   7 1023.44  117.02
  -5  -3   7  971.05   58.58
  -5  -3   7 1040.28   96.35
   5  -3  -7  898.13   48.05
  -5   3   6 2490.92  144.09
   5   3  -6 2522.87  106.48
   5   3  -6 2516.51  122.44
   5   3  -6 2447.23  116.17
   5   3  -6 2613.86  126.09
  -5   3   6 2467.34  107.47
  -5   3   6 2476.63  108.52
  -5   3   6 2411.45  114.98
  -5   3   6 2249.02  114.05
   5  -3  -6 2437.24  105.09
  -5  -3   6 2583.74  183.82
  -5  -3   6 2668.03  108.07
   5  -3  -6 2516.61  138.57
  -5  -3   6 2310.17  152.71
   5   3  -5  396.41   39.22
  -5   3   5  430.63   56.00
   5   3  -5  402.85   24.99
   5   3  -5  412.80   39.61
   5   3  -5  409.60   38.30
  -5   3   5  413.90   47.38
  -5   3   5  402.52   34.02
  -5   3   5  396.37   38.19
   5  -3  -5  331.17   32.27
  -5  -3   5  348.63   31.73
   5  -3  -5  356.42   31.00
  -5  -3   5  337.85   40.73
   5  -3  -5  340.45   50.60
  -5   3   4   65.18   12.17
  -5   3   4   45.61   37.07
   5   3  -4   81.69   24.28
   5   3  -4   74.79   27.45
  -5   3   4   63.22   23.32
   5   3  -4   54.13   26.51
   5  -3  -4  135.97   38.40
   5  -3  -4  140.81   22.90
  -5  -3   4  148.71   14.56
  -5  -3   4    2.21   26.93
   5  -3  -4  132.66   12.79
  -5  -3   4  155.72   28.91
  -5  -3   4  146.86   32.81
  -5   3   3  252.65   49.19
   5   3  -3  235.43   20.67
   5   3  -3  268.11   56.39
   5   3  -3  163.84   58.09
  -5   3   3  224.94   23.11
  -5   3   3  266.55   51.29
   5  -3  -3  170.17   50.44
   5  -3  -3  147.16   13.78
  -5  -3   3  159.47   34.96
  -5  -3   3  179.15   27.47
  -5  -3   3  171.35   33.39
  -5  -3   3  153.38   56.98
   5  -3  -3  171.35   44.95
  -5   3   210420.50  471.93
  -5   3   210962.34  566.95
   5   3  -211328.92  522.03
  -5   3   211184.67  551.98
   5   3  -211403.54  546.02
   5   3  -211417.85  557.35
   5  -3  -210969.61  492.41
   5  -3  -211589.41  569.86
  -5  -3   211703.78  567.44
   5  -3  -211012.79  515.82
  -5  -3   211485.88  526.63
  -5  -3   211569.85  558.89
  -5  -3   211200.60  546.30
   5  -3  -210929.94  608.84
   5   3  -1  811.49   90.12
  -5   3   1  938.25  125.80
   5   3  -1  876.36   58.76
  -5   3   1  814.37   34.10
   5   3  -1  846.25   55.79
  -5   3   1  835.25   65.27
   5  -3  -1  848.40   41.77
   5  -3  -1  809.89   64.22
   5  -3  -1  737.39   40.41
  -5  -3   1  825.38   54.82
  -5  -3   1  801.80   56.45
  -5  -3   1  793.62   60.36
   5  -3  -1  772.31   74.56
  -5   3   0 1048.58   86.39
   5   3   0 1033.05   61.02
   5   3   0 1046.66   52.21
   5   3   0 1066.92   71.01
  -5   3   0  986.42   75.32
   5  -3   0  982.27   47.43
   5  -3   0 1018.55  108.60
   5  -3   0  987.72   83.83
  -5  -3   0  987.84   53.11
  -5  -3   0 1008.17   49.36
  -5  -3   0 1028.11   61.09
  -5  -3   0  991.02   65.45
  -5   3  -1 7649.38  423.03
  -5   3  -1 6353.12  334.07
   5   3   1 6300.98  313.25
   5   3   1 7190.09  344.25
   5  -3   1 8316.35  445.24
  -5  -3  -1 6518.98  309.74
   5  -3   1 6616.72  390.58
  -5  -3  -1 6797.41  300.30
  -5  -3  -1 6705.69  331.58
  -5  -3  -1 6718.93  321.30
   5   3   2 3502.45  161.64
   5   3   2 3354.64  150.82
   5   3   2 3532.58  156.31
  -5   3  -2 3696.87  204.67
  -5   3  -2 3696.35  193.70
  -5  -3  -2 3648.27  159.81
  -5  -3  -2 3674.23  176.01
  -5  -3  -2 3501.30  176.64
   5   3   3 6603.19  313.67
   5   3   3 6400.93  301.35
   5   3   3 6330.19  285.10
   5   3   3 6371.43  311.08
  -5   3  -3 6109.95  330.60
  -5   3  -3 6337.16  324.35
  -5  -3  -3 6478.85  293.78
  -5  -3  -3 6417.72  308.76
   5   3   4  685.36   67.68
   5   3   4  658.54   35.19
   5   3   4  691.74   59.73
  -5   3  -4  666.82   68.25
  -5  -3  -4  615.42   70.22
  -5   3  -5    3.75   49.73
   5   3   5   17.69   18.73
   5   3   5   -1.83   41.70
   5  -3   5   34.92   26.89
  -5  -3  -5    6.26   20.46
  -5   3  -6 2149.71  134.28
   5   3   6 2110.01  117.49
   5   3   6 2000.40  121.98
  -5   3  -6 1955.94   89.90
   5  -3   6 2208.41  128.76
  -5  -3  -6 2215.60  118.47
  -5   3  -7 3744.29  203.69
   5   3   7 3723.08  194.15
   5   3   7 3534.80  194.03
  -5   3  -7 3333.55  152.56
   5  -3   7 3972.76  251.13
  -5  -3  -7 3839.10  193.40
  -5   3  -8  606.05   92.27
   5   3   8  587.78   58.16
   5   3   8  565.33   95.75
  -5   3  -8  448.74   31.54
   5  -3   8  618.33   65.19
  -5  -3  -8  627.11   48.31
  -5   3  -9 2105.12  123.13
   5   3   9 2124.42  166.49
   5   3   9 2156.24  129.91
   5  -3   9 2236.33  135.40
  -5  -3  -9 2057.80  110.27
  -5   3 -10  974.98   93.26
   5   3  10 1176.66   83.71
   5   3  10 1102.60   82.81
   5  -3  10 1232.60  130.81
  -5  -3 -10 1109.40   69.41
   5   3  11  398.01   46.10
   5   3  11  357.16   72.74
  -5   3 -11  293.66   22.28
   5  -3  11  274.13   44.03
  -5  -3 -11  233.02   33.01
  -5   4  15  706.93   97.93
   5   4 -14  713.81   41.31
  -5   4  14  908.70   83.06
   5  -4 -14 1000.99   54.82
  -5  -4  14 1060.85   67.97
  -5  -4  14 1020.65   61.34
   5   4 -13   11.74   11.57
  -5   4  13   33.46   30.63
   5  -4 -13   17.08   19.60
  -5  -4  13   30.56   24.63
  -5  -4  13   24.81   18.64
   5   4 -12  298.50   39.93
  -5   4  12  314.24   58.61
   5  -4 -12  258.74   43.41
  -5  -4  12  333.53   50.34
  -5  -4  12  273.27   57.24
   5   4 -11  275.44   40.14
  -5   4  11  261.86   59.76
   5  -4 -11  283.78   50.02
  -5  -4  11  307.06   83.23
  -5  -4  11  346.87   56.73
   5   4 -10 1267.00   81.82
  -5   4  10 1235.71  104.14
   5  -4 -10  807.90   81.99
  -5  -4  10 1377.34  140.93
  -5  -4  10 1404.01  102.82
   5   4  -9 9315.02  463.28
   5   4  -9 8280.84  401.70
  -5   4   9 8724.25  474.77
  -5   4   9 8918.79  443.41
  -5  -4   9 8721.74  458.96
  -5  -4   9 7995.31  432.58
   5   4  -8 1440.90   71.17
   5   4  -8 1536.80   76.53
  -5   4   8 1472.05  115.39
  -5   4   8 1417.09   88.89
  -5  -4   8 1520.18  106.22
  -5  -4   8 1421.54   81.52
   5   4  -7 8397.92  388.80
   5   4  -7 8102.18  384.08
  -5   4   7 8232.34  436.87
  -5   4   7 7805.65  382.08
  -5  -4   7 8339.37  424.24
  -5  -4   7 8310.53  401.98
   5   4  -6 5759.59  252.50
   5   4  -6 5268.12  243.36
  -5   4   6 5331.79  285.88
  -5   4   6 5228.43  247.70
  -5  -4   6 5210.14  305.93
  -5  -4   6 5038.47  240.71
  -5   4   5 2363.44  104.11
   5   4  -5 2528.66  111.22
   5   4  -5 2408.73  117.78
   5   4  -5 2733.37  146.86
  -5   4   5 2513.49  202.22
  -5   4   5 2569.67  123.93
   5  -4  -5 2288.95  103.06
  -5  -4   5 2673.30  128.98
  -5  -4   5 2311.83  167.16
  -5  -4   5 2320.73  115.51
  -5   4   411303.26  540.30
   5   4  -410610.57  521.42
   5   4  -410569.60  513.76
   5   4  -411200.64  543.41
  -5   4   410279.40  501.15
  -5  -4   411711.78  544.09
   5  -4  -411027.47  538.92
  -5  -4   411406.38  582.99
  -5   4   3 8945.98  438.04
   5   4  -3 9564.48  444.05
   5   4  -3 9254.40  446.91
   5   4  -310202.51  509.33
  -5   4   3 9223.23  484.82
  -5   4   3 9449.02  443.48
   5  -4  -3 9479.90  460.79
  -5  -4   310228.59  483.91
  -5  -4   310222.23  492.83
  -5  -4   310538.17  501.43
   5   4  -2 2456.12  123.04
  -5   4   2 2407.52  151.53
   5   4  -2 2504.11  112.68
   5   4  -2 2442.21  117.87
  -5   4   2 2452.08  148.16
  -5   4   2 2467.12  108.11
   5  -4  -2 2617.14  151.27
  -5  -4   2 2484.21  118.91
  -5  -4   2 2630.52  113.56
  -5  -4   2 2554.31  128.15
   5  -4  -2 2466.46  124.58
  -5  -4   2 2602.38  127.82
   5   4  -1  545.98   45.97
   5   4  -1  518.98   54.22
  -5   4   1  517.59  103.98
   5   4  -1  563.95   43.17
  -5   4   1  551.35   78.51
   5  -4  -1  616.23   51.39
   5  -4  -1  409.83   26.90
  -5  -4   1  639.55   55.24
  -5  -4   1  653.78   37.97
  -5  -4   1  586.70   65.34
   5   4   0   11.50   12.13
   5   4   0   -4.18   25.04
   5   4   0   -7.58   24.06
  -5   4   0    8.04   24.24
  -5   4   0   -7.17   19.79
  -5  -4   0    3.20    8.84
  -5  -4   0   12.09   18.90
  -5  -4   0    1.81   14.40
   5   4   1  464.07   37.41
   5   4   1  495.37   40.81
  -5   4  -1  463.47   62.12
  -5   4  -1  513.37   57.64
  -5  -4  -1  505.07   43.39
   5   4   2  563.75   42.23
   5   4   2  539.11   48.91
  -5   4  -2  579.49   69.04
  -5   4  -2  541.10   62.98
  -5  -4  -2  691.10   45.12
   5   4   3   80.49   30.78
   5   4   3   71.22   26.78
  -5   4  -3   95.99   39.99
  -5   4  -3   85.77   65.55
  -5  -4  -3   46.08   22.53
   5   4   4 1359.27   67.78
   5   4   4 1314.01   83.29
  -5   4  -4 1390.88  109.53
  -5  -4  -4 1346.73   77.95
  -5   4  -5 4177.58  238.13
   5   4   5 4051.67  184.31
   5   4   5 4126.07  210.44
   5  -4   5 4364.89  224.10
  -5  -4  -5 4222.15  240.43
  -5   4  -6  661.28   77.50
   5   4   6  643.37   65.56
   5   4   6  682.09   60.63
   5  -4   6  656.18   63.18
  -5  -4  -6  601.48   58.97
  -5   4  -7 2878.75  223.95
   5   4   7 2911.15  174.73
   5   4   7 2837.87  157.14
   5  -4   7 3345.70  210.66
  -5  -4  -7 3074.16  164.46
  -5   4  -8 2371.33  149.14
   5   4   8 2199.30  122.73
   5   4   8 2282.23  131.29
   5  -4   8 2448.17  138.33
  -5  -4  -8 2454.66  167.07
  -5   4  -9  477.17   57.53
   5   4   9  459.18   47.33
   5   4   9  419.52   49.34
   5  -4   9  490.30   52.18
  -5  -4  -9  465.26   43.09
  -5   4 -10  366.07   72.90
   5   4  10  346.98   39.97
   5   4  10  328.80   43.50
   5  -4  10  389.41   45.01
  -5  -4 -10  363.18   38.37
   5   4  11  271.91   39.98
   5   4  11  533.09   43.65
  -5  -4 -11  353.87   36.39
   5   5 -14   25.70   10.95
  -5   5  14  157.53   57.50
   5  -5 -14   21.46   14.05
  -5  -5  14   32.48   23.84
   5   5 -13 1450.03   70.91
  -5   5  13 1479.11  111.10
   5  -5 -13 1344.65   84.13
  -5  -5  13 1337.93   93.65
   5   5 -12  763.24   46.56
  -5   5  12  796.38   86.09
   5  -5 -12  771.30   70.52
  -5  -5  12  852.17   75.17
   5   5 -11  305.19   29.00
  -5   5  11  296.44   62.50
   5  -5 -11  197.17   49.61
  -5  -5  11  256.55   86.71
   5   5 -10  324.82   27.60
  -5   5  10  315.23   57.62
   5  -5 -10   10.57   41.87
  -5  -5  10  238.83   81.35
  -5  -5  10  138.98   16.56
   5   5  -9  136.73   23.77
  -5   5   9  143.13   51.66
  -5   5   9  136.14   37.09
  -5  -5   9  197.00   76.68
   5   5  -8 8118.36  385.36
   5   5  -8 8051.84  398.61
  -5   5   8 8469.90  456.65
  -5   5   8 8572.71  422.74
  -5  -5   8 7570.43  400.70
  -5  -5   8 6955.74  344.94
   5   5  -7  462.00   36.09
   5   5  -7  485.92   36.50
  -5   5   7  449.50   68.81
  -5   5   7  435.07   48.35
  -5  -5   7  267.61   53.95
  -5  -5   7  253.06   29.64
   5   5  -6 2497.96  115.56
   5   5  -6 2479.98  117.49
  -5   5   6 2554.21  208.83
  -5   5   6 2293.27  122.25
  -5  -5   6 2100.20  166.71
  -5  -5   6 1919.06  114.94
   5   5  -5 1331.17   91.18
   5   5  -5 1364.24   76.78
  -5   5   5 1338.86  157.81
  -5   5   5 1312.65   77.30
  -5  -5   5 1416.94  122.11
  -5  -5   5 1391.09   70.83
   5   5  -4 1383.93   71.59
   5   5  -4 1304.83  102.94
  -5   5   4 1331.12  105.85
  -5   5   4 1352.80   73.03
  -5  -5   4 1285.45   79.15
  -5  -5   4 1263.18   66.13
   5   5  -3  200.69   28.77
   5   5  -3  205.37   57.43
  -5   5   3  196.62   51.78
  -5   5   3  191.85   24.67
  -5   5   3  191.45   25.44
  -5  -5   3  305.75   31.72
  -5  -5   3  313.78   27.57
   5   5  -2 1193.14   66.02
   5   5  -2 1138.41   72.37
  -5   5   2 1216.71   95.58
  -5   5   2 1179.39   69.48
  -5   5   2 1305.16   61.68
  -5  -5   2 1443.29   72.08
  -5  -5   2 1458.00   88.23
   5   5  -1 4392.45  224.84
   5   5  -1 4195.41  202.14
  -5   5   1 4065.63  226.65
  -5   5   1 4313.67  211.64
  -5  -5   1 4606.53  209.94
   5   5   0 1378.75   74.37
   5   5   0 1337.00   78.49
  -5   5   0 1341.27   98.06
  -5   5   0 1326.64   85.05
  -5  -5   0 1099.83   63.78
   5   5   1 1115.75   68.42
   5   5   1 1264.86   74.86
   5   5   1 1231.09   68.26
  -5   5  -1 1225.93   95.15
  -5   5  -1 1204.10  122.08
   5   5   2   37.48   18.29
  -5   5  -2   29.21   34.45
  -5   5  -2   54.04   58.64
  -5  -5  -2   34.29   21.76
   5   5   3 3126.83  148.94
   5   5   3 2984.53  147.62
  -5   5  -3 3193.27  185.66
  -5   5  -3 3197.88  188.07
  -5  -5  -3 2790.89  142.59
  -5   5  -4  129.40   45.76
   5   5   4  113.81   20.93
   5   5   4  110.46   39.43
   5  -5   4   -5.13   30.68
  -5  -5  -4   67.97   28.08
  -5   5  -5  242.66   59.43
   5   5   5  266.59   39.56
   5   5   5  237.31   33.16
   5  -5   5  229.80   40.25
  -5  -5  -5  223.16   67.36
  -5   5  -6 4678.40  322.14
   5   5   6 4097.20  193.87
   5   5   6 4875.78  237.79
   5  -5   6 4922.97  243.18
  -5  -5  -6 4601.54  235.30
   5   5   7  847.60   84.72
  -5   5  -7  936.86   94.80
   5  -5   7  944.20   98.74
  -5  -5  -7  926.44   74.51
   5   5   8  600.53   48.78
  -5   5  -8  603.06   73.23
   5  -5   8  595.71   50.81
  -5  -5  -8  578.11   85.11
  -5   5  -9  222.44   73.18
   5   5   9  108.96   21.07
   5   5   9  174.66   28.70
   5  -5   9  171.89   45.86
  -5  -5  -9  177.77   29.17
   5   5  10  510.89   40.72
  -5   5 -10  541.97   56.61
  -5  -5 -10  483.20   42.61
   5   6 -13  365.75   44.07
  -5   6  13  460.07  101.87
   5  -6 -13  392.93   43.73
  -5  -6  13  429.87   53.66
   5   6 -12  706.12   46.11
  -5   6  12  711.89  125.70
   5  -6 -12  756.07   67.20
  -5  -6  12  821.42   73.12
   5   6 -11  326.59   32.94
  -5   6  11  322.09  102.35
   5  -6 -11  308.29   52.77
  -5  -6  11  377.03   55.27
   5   6 -10  607.79   45.32
  -5   6  10  657.02   81.42
  -5  -6  10  734.81  112.04
   5   6  -9 1566.39   82.87
  -5   6   9 1496.72  176.22
  -5   6   9 1488.83  101.35
  -5  -6   9 1273.88  146.87
   5   6  -8  456.10   40.84
  -5   6   8  451.69  116.01
  -5   6   8  417.92   52.17
  -5  -6   8  465.83   96.40
   5   6  -7 2141.60  131.58
   5   6  -7 2012.54   96.89
  -5   6   7 1961.79  116.04
  -5  -6   7 1968.01  163.91
   5   6  -6  383.71   62.18
   5   6  -6  354.16   32.60
  -5   6   6  353.32   66.66
  -5   6   6  331.22   43.43
  -5  -6   6  251.84   75.23
   5   6  -5 2062.32  107.01
   5   6  -5 2079.51  104.92
  -5   6   5 2094.84  143.03
  -5   6   5 1877.92  104.67
  -5  -6   5 1737.86  104.65
   5   6  -4 5628.57  269.98
   5   6  -4 5758.61  275.76
  -5   6   4 5782.34  316.50
  -5   6   4 5458.28  263.21
  -5  -6   4 5950.78  292.70
   5   6  -3 7936.01  374.71
   5   6  -3 7435.83  359.37
  -5   6   3 7253.43  389.72
  -5   6   3 7111.41  340.53
  -5  -6   3 6961.40  343.88
   5   6  -2 1759.65  122.15
   5   6  -2 1717.55   97.25
  -5   6   2 1819.57  170.96
  -5   6   2 1750.12   90.18
  -5   6   2 1529.50   73.59
   5   6  -1  573.34   49.39
   5   6  -1  602.05   55.32
  -5   6   1  635.67   70.75
  -5   6   1  643.85   51.44
   5   6   0 5432.92  263.02
   5   6   0 5897.19  324.47
  -5   6   0 5700.12  304.22
  -5   6   0 5864.53  298.45
   5   6   1  911.24   64.72
   5   6   1  943.65   98.34
  -5   6  -1  947.57  120.60
  -5   6  -1 1005.80   78.22
   5   6   2  696.29   55.13
  -5   6  -2  687.01   69.55
  -5   6  -2  728.56   73.37
  -5  -6  -2  740.08   56.64
   5   6   3 1281.33   75.54
   5   6   3 1174.85   61.69
  -5   6  -3 1207.86   92.95
  -5   6  -3 1303.27  102.44
  -5  -6  -3 1353.56   82.55
  -5   6  -4 1616.50  118.70
   5   6   4 1554.34  107.44
   5   6   4 1459.25   74.93
   5  -6   4 1475.11   87.34
  -5   6  -5    6.92   58.30
   5   6   5   15.67   13.25
   5   6   5   13.40   12.27
   5  -6   5    4.55   18.16
  -5  -6  -5   -8.99   40.63
  -5   6  -6  581.17   80.24
   5   6   6  503.49   34.54
   5   6   6  535.21   38.53
   5  -6   6  593.05   65.89
  -5  -6  -6  606.43   59.99
   5   6   7  914.82   53.10
  -5   6  -7  944.33   95.01
   5  -6   7  946.95   60.32
  -5  -6  -7 1007.69   77.00
   5   6   8   45.59   23.96
  -5   6  -8   69.41   39.13
   5  -6   8   37.71   15.35
  -5  -6  -8   40.13   44.57
  -5   6  -9 1053.63   92.38
  -5  -6  -9 1002.36   62.71
   5   7 -12  579.05   40.81
  -5   7  12  616.30   69.69
   5  -7 -12  651.86   59.05
  -5  -7  12  691.53   64.34
   5   7 -11  192.40   28.78
  -5   7  11   89.67   45.04
   5  -7 -11   77.79   37.19
  -5  -7  11   59.09   39.62
   5   7 -10 1033.11   84.36
  -5   7  10  992.35   89.79
   5  -7 -10  752.94   75.99
  -5  -7  10  896.94   77.99
   5   7  -9  955.39   85.86
  -5   7   9  947.80   91.08
  -5  -7   9  905.93   77.38
   5   7  -8  119.24   27.64
  -5   7   8   94.56   47.28
  -5   7   8  108.97   37.77
  -5  -7   8  113.19   37.34
   5   7  -7 1288.08   75.45
  -5   7   7 1176.37   83.92
  -5  -7   7 1151.86   82.83
   5   7  -6  474.90   45.50
   5   7  -6  480.76   52.74
  -5   7   6  465.97   67.79
  -5   7   6  446.80   49.15
  -5  -7   6  616.92   51.67
   5   7  -5  226.57   34.83
   5   7  -5  235.73   46.28
  -5   7   5  221.33   52.27
  -5   7   5  223.42   33.80
  -5  -7   5  245.01   32.82
   5   7  -4   24.20   22.96
   5   7  -4   37.18   35.05
  -5   7   4   18.02   18.71
  -5  -7   4   51.19   16.72
   5   7  -3   95.71   49.99
   5   7  -3  143.88   50.09
  -5   7   3  110.60   67.94
  -5   7   3   99.85   19.41
   5   7  -2 2036.39  141.54
   5   7  -2 2096.67  146.75
  -5   7   2 2097.00  131.73
   5   7  -1  803.34   63.62
   5   7  -1  906.83   68.07
  -5   7   1  925.40   76.50
   5   7   0 4268.39  210.70
   5   7   0 4384.21  217.68
  -5   7   0 4424.75  271.29
  -5   7   0 4301.65  218.15
   5   7   1 1507.13   91.60
  -5   7  -1 1582.95  104.19
  -5   7  -1 1475.99  124.21
   5   7   2   46.12   26.47
  -5   7  -2   55.69   28.62
  -5   7  -2   54.52   51.46
  -5  -7  -2   50.62   27.35
   5   7   3 1040.33   98.68
  -5   7  -3 1111.79  137.84
  -5  -7  -3 1102.85   74.31
   5   7   4  273.70   35.67
  -5   7  -4  292.04   60.53
   5  -7   4  383.02   33.48
  -5  -7  -4  405.10   47.86
   5   7   5 3431.74  162.56
  -5   7  -5 3567.17  210.63
  -5  -7  -5 3418.40  218.44
   5   7   6  431.65   48.18
  -5   7  -6  459.92   69.25
  -5  -7  -6  427.32   52.85
   5   7   7  108.63   14.92
  -5   7  -7  168.98   78.95
  -5  -7  -7  171.14   35.73
  -5   7  -8  783.90   86.78
  -5  -7  -8  983.40   59.02
   5   8 -10 3437.20  160.42
  -5   8  10 3405.03  183.36
   5  -8 -10 3093.02  177.76
  -5  -8  10 3325.97  173.29
   5   8  -9  367.73   36.56
  -5   8   9  385.49   54.49
   5  -8  -9  267.27   48.92
  -5  -8   9  353.20   46.19
   5   8  -8  189.93   30.20
  -5   8   8  212.29   44.09
   5  -8  -8   -7.21   34.20
  -5  -8   8  191.34   33.23
   5   8  -7  616.92   49.85
  -5   8   7  606.60   64.09
  -5   8   7  587.29   56.45
  -5  -8   7  566.37   49.64
   5   8  -6  317.29   39.35
   5   8  -6  269.10   23.92
  -5   8   6  328.94   77.18
  -5   8   6  286.19   39.68
  -5  -8   6  336.26   33.21
   5   8  -5 1620.36   91.80
   5   8  -5 1637.20   81.76
  -5   8   5 1585.06  142.60
  -5   8   5 1444.47   82.80
   5   8  -4 1840.35  133.19
   5   8  -4 1934.65   96.23
  -5   8   4 1918.13  118.38
  -5   8   4 1701.87   89.59
   5   8  -3  287.60   40.79
   5   8  -3  302.85   35.24
  -5   8   3  288.75   44.67
   5   8  -2  127.21   33.14
   5   8  -2  118.81   30.46
  -5   8   2  130.02   33.82
   5   8  -1 1944.61  109.39
   5   8  -1 2033.83  110.48
  -5   8   1 1965.24  144.16
   5   8   0  459.21   49.11
   5   8   0  444.67   48.84
  -5   8   0  419.62   46.15
   5   8   1 1842.79  138.64
  -5   8  -1 1670.26   99.48
  -5   8  -1 1855.95  102.58
  -5  -8  -1 1721.97  102.57
   5   8   2 2008.93  142.70
  -5   8  -2 2081.79  121.22
  -5  -8  -2 2082.43  116.16
   5   8   3 1606.96   92.25
  -5   8  -3 1650.67  106.58
  -5  -8  -3 1712.43   99.21
   5   8   4 2055.03  107.53
  -5   8  -4 2265.02  136.04
  -5  -8  -4 2318.13  167.57
   5   8   5  166.03   26.56
  -5   8  -5  152.97   75.28
  -5  -8  -5  187.60   38.75
   5   8   6  595.22   38.32
  -5   8  -6  701.40   76.39
  -5  -8  -6  732.07   61.84
   5   9  -8 1424.68  103.06
  -5   9   8 1510.07   82.65
   5  -9  -8 1144.84   79.70
   5   9  -7  290.71   57.58
  -5   9   7  480.14   44.16
   5  -9  -7  131.12   33.49
   5   9  -6 2435.40  118.45
  -5   9   6 2730.05  133.52
   5  -9  -6 1591.52   90.73
   5   9  -5 2251.56  115.04
   5   9  -5 1842.15   94.11
  -5   9   5 2389.18  122.34
   5   9  -4  766.08   59.59
   5   9  -4  823.53   63.61
  -5   9   4  817.57   64.24
   5   9  -3 1160.17   74.49
   5   9  -3 1108.43   80.00
  -5   9   3 1107.17   87.38
   5   9  -2  201.43   36.85
   5   9  -2  228.70   47.21
   5   9  -1  789.93   60.05
  -5  -9   1   -6.10   35.66
   5   9   0  490.53   45.99
  -5  -9   0  626.54   55.58
   5   9   1  447.78   43.05
  -5  -9  -1  336.34   45.43
   5   9   2  938.63   63.02
  -5  -9  -2  931.76   66.45
   5   9   3  580.86   46.89
  -5   9  -3  504.74   44.76
  -5  -9  -3  739.83   92.28
   5   9   4  699.76   72.77
  -5  -9  -4  748.07   62.13
  -5 -10   3    4.89   17.76
   5  10  -2  115.85   19.23
  -5 -10   2  159.55   32.51
   5  10  -1  875.10   50.24
  -5 -10   1  882.64   62.71
  -6   0  16  232.55   72.59
  -6   0  15 1047.42   81.81
  -6   0  14 7980.48  415.01
  -6   0  13  174.93   44.12
   6   0 -12 1116.69   66.92
  -6   0  12 1238.49   91.65
   6   0 -11  239.44   32.76
  -6   0  11  239.96   46.93
   6   0 -10  115.87   28.58
  -6   0  10  110.96   40.34
  -6   0  10  111.77   37.81
   6   0  -9 3420.18  169.79
  -6   0   9 3364.74  192.10
  -6   0   9 3311.80  176.22
   6   0  -8  310.32   38.37
  -6   0   8  231.22   58.74
  -6   0   8  221.10   42.35
   6   0  -7 1053.17   50.50
   6   0  -7 1084.62   69.67
  -6   0   7 1119.64   73.27
  -6   0   7  973.21   71.04
   6   0  -6   10.75    9.86
   6   0  -6   12.35   18.03
   6   0  -6    3.97   15.69
   6   0  -6  -20.79   30.12
  -6   0   6   -3.85   11.65
  -6   0   6   11.77   19.63
  -6   0   6   14.23   25.07
  -6   0   6    1.25   32.62
   6   0  -5  943.89   50.63
   6   0  -5 1008.82   65.49
   6   0  -5  972.60   59.13
   6   0  -5 1062.29   68.13
  -6   0   5  958.20   54.70
  -6   0   5  958.35   72.40
  -6   0   5 1008.23   89.18
  -6   0   5 1140.58   71.71
   6   0  -4  158.63   22.59
   6   0  -4  154.96   29.85
   6   0  -4  133.46   31.81
  -6   0   4  149.77   40.07
  -6   0   4  155.02   38.31
  -6   0   4  110.17   51.16
  -6   0   4  152.19   32.78
   6   0  -3  479.58   54.16
   6   0  -3  471.94   56.49
   6   0  -3  483.30   41.31
   6   0  -3  490.16   48.86
  -6   0   3  450.70   39.18
  -6   0   3  474.93   54.51
  -6   0   3  490.14   76.84
   6   0  -2 5718.16  269.79
   6   0  -2 5785.37  291.16
   6   0  -2 6037.77  275.61
   6   0  -2 6481.98  302.48
  -6   0   2 5642.64  270.24
  -6   0   2 6129.56  344.98
  -6   0   2 6383.83  297.39
   6   0  -1   30.17   31.63
   6   0  -1   30.12   26.69
   6   0  -1   25.98   13.67
   6   0  -1  -14.42   34.97
  -6   0   1   28.07   34.67
  -6   0   1    9.68   25.77
  -6   0   1   -4.82   22.45
   6   0   0 5517.41  266.34
   6   0   0 5505.29  271.97
   6   0   0 5478.92  239.88
  -6   0   0 5690.62  277.97
  -6   0   0 5511.58  269.42
  -6   0   0 5378.90  254.99
   6   0   1 8836.11  434.50
   6   0   1 8784.27  463.62
   6   0   1 8042.36  366.34
  -6   0  -1 8492.91  430.04
  -6   0  -1 8989.32  471.58
  -6   0  -1 8299.71  400.82
   6   0   2  140.48   30.75
   6   0   2  157.55   36.24
   6   0   2  170.78   49.99
  -6   0  -2  140.35   31.02
   6   0   3  786.55   59.49
   6   0   3  750.64   57.91
  -6   0  -3  751.47   53.92
  -6   0  -3  673.72   30.73
   6   0   4 3053.72  157.14
   6   0   4 2913.51  153.79
  -6   0  -4 3098.60  151.55
  -6   0  -4 2659.30  113.42
   6   0   5 2726.36  182.28
   6   0   5 2413.84  169.93
  -6   0  -5 2447.07  121.81
  -6   0  -5 2146.54   95.94
   6   0   6  626.69   64.71
   6   0   6  569.14   55.98
  -6   0  -6  502.46   43.75
   6   0   7  246.97   49.42
   6   0   7  245.92   41.79
  -6   0  -7  185.44   34.47
   6   0   8 1825.23  120.80
   6   0   8 1853.41  106.66
  -6   0  -8 1481.45   73.75
   6   0   9  104.36   39.59
   6   0   9   76.58   29.33
  -6   0  -9   65.53   16.89
   6   0  10   15.87   28.62
   6   0  10   11.91   34.91
  -6   0 -10   14.11   18.73
   6   0  11  768.25   94.42
   6   0  11  269.73   34.83
  -6   1  16   89.93   52.69
  -6   1  15 1652.30  104.36
  -6  -1  15 1823.88  157.55
  -6   1  14  103.92   36.41
  -6  -1  14  152.89   40.33
  -6   1  13 1577.05  102.50
   6  -1 -13 1362.28   76.09
  -6  -1  13 1909.23  118.36
  -6   1  12  456.35   56.26
  -6  -1  12  552.28   62.97
  -6  -1  12  563.99   65.30
   6  -1 -12  569.20   45.71
   6   1 -11 4175.62  226.48
  -6   1  11 4379.37  229.71
  -6   1  11 4264.31  218.32
  -6  -1  11 4777.81  266.95
   6  -1 -11 4942.44  240.19
  -6  -1  11 4446.93  238.95
   6   1 -10  523.19   46.92
  -6   1  10  538.09   55.62
  -6   1  10  514.60   44.19
  -6  -1  10  509.66   50.33
   6  -1 -10  559.45   83.15
  -6  -1  10  564.48   62.69
  -6   1   9 1289.02   83.01
   6   1  -9 1143.31   74.49
  -6   1   9 1124.03   70.25
  -6   1   9 1115.93   63.79
  -6  -1   9 1259.74   81.77
  -6  -1   9 1222.63   88.84
   6  -1  -9 1309.20  112.56
  -6   1   8 6879.30  338.71
   6   1  -8 7173.60  349.73
  -6   1   8 7068.04  349.59
  -6   1   8 6855.37  328.99
  -6  -1   8 6976.95  348.10
  -6  -1   8 7001.64  352.72
   6  -1  -8 7146.75  346.34
  -6   1   7 1923.27  135.49
   6   1  -7 2076.68  111.98
  -6   1   7 1999.59  107.29
  -6   1   7 2060.37  107.21
  -6   1   7 2220.53  115.59
   6  -1  -7 2317.57  120.33
  -6  -1   7 2391.75  130.08
   6  -1  -7 2288.98  131.66
  -6  -1   7 2401.77  130.09
   6   1  -6  587.99   82.09
  -6   1   6  544.04   68.64
   6   1  -6  540.06   48.85
   6   1  -6  576.90   43.60
  -6   1   6  517.56   68.24
  -6   1   6  558.52   57.67
  -6   1   6  552.46   47.84
   6  -1  -6  436.85   40.92
   6  -1  -6  471.86   39.98
  -6  -1   6  761.69   69.16
   6  -1  -6  484.79   47.92
   6  -1  -6  458.18   42.31
  -6  -1   6  477.69   85.02
  -6   1   5 9759.41  482.10
   6   1  -5 9657.48  474.93
   6   1  -5 9970.12  482.01
   6   1  -510247.44  513.11
  -6   1   5 9316.40  490.58
  -6   1   5 9671.19  474.64
  -6   1   511083.52  524.15
   6  -1  -5 9473.17  455.36
   6  -1  -5 9611.24  489.09
  -6  -1   5 9407.89  505.04
  -6  -1   5 9564.05  525.21
  -6  -1   510487.74  510.18
   6  -1  -5 9551.08  490.57
   6   1  -4 3097.38  138.39
  -6   1   4 3168.32  148.78
  -6   1   4 3571.98  171.41
   6   1  -4 3267.83  188.94
   6   1  -4 3411.81  182.10
   6   1  -4 3587.62  173.58
  -6   1   4 3161.42  198.29
   6  -1  -4 3033.31  170.92
   6  -1  -4 3228.88  148.47
  -6  -1   4 2656.09  117.96
  -6  -1   4 2956.74  160.44
   6  -1  -4 3209.98  165.54
  -6  -1   4 2885.94  179.52
  -6  -1   4 3327.92  165.97
   6  -1  -4 3102.33  151.93
   6   1  -3  786.34   39.26
  -6   1   3  744.14   89.17
   6   1  -3  723.09   49.24
  -6   1   3  734.21   65.93
   6   1  -3  755.23   82.10
  -6   1   3  783.15   74.26
   6  -1  -3  878.73   70.89
   6  -1  -3  898.79   87.55
  -6  -1   3  874.67   69.66
   6  -1  -3  896.52   53.18
  -6  -1   3  807.33   83.61
  -6  -1   3  802.61   96.67
   6  -1  -3  841.00   75.42
   6   1  -2  257.14   23.31
  -6   1   2  257.82   40.93
   6   1  -2  257.90   27.32
  -6   1   2  257.05   31.63
   6   1  -2  255.63   31.88
  -6   1   2  254.51   44.20
   6  -1  -2  225.04   45.21
   6  -1  -2  213.13   25.60
  -6  -1   2  218.40   24.23
  -6  -1   2  219.74   41.29
   6  -1  -2  205.97   37.46
  -6  -1   2  201.26   40.13
   6  -1  -2  225.32   30.42
   6   1  -1 1152.96   77.19
   6   1  -1 1188.51   80.57
   6   1  -1 1132.33  111.79
   6   1  -1 1129.25   62.74
  -6   1   1 1040.58   62.65
  -6   1   1 1135.15   81.54
  -6   1   1 1128.57   82.60
   6  -1  -1 1327.88   82.86
   6  -1  -1 1256.46   58.49
   6  -1  -1 1257.04   67.93
   6  -1  -1 1273.20  125.75
  -6  -1   1 1330.58  115.69
  -6  -1   1 1256.84   67.60
  -6  -1   1 1212.89   78.20
   6   1   0 5704.99  262.19
  -6   1   0 5924.42  335.75
   6   1   0 5713.51  271.29
   6   1   0 6144.01  291.34
   6   1   0 5516.13  256.94
  -6   1   0 5367.13  245.32
   6  -1   0 4778.10  208.19
   6  -1   0 5362.44  308.34
  -6  -1   0 5476.80  260.85
   6  -1   0 5491.35  271.33
  -6  -1   0 4956.94  200.45
  -6  -1   0 4981.13  279.85
  -6  -1   0 5161.71  214.40
   6   1   1  643.65   42.29
   6   1   1  659.18   47.03
  -6   1  -1  629.56   59.93
   6   1   1  656.76   49.70
   6   1   1  636.03   34.54
  -6   1  -1  656.57   67.43
  -6   1  -1  596.06   44.18
   6  -1   1  728.96   61.49
  -6  -1  -1  691.00   50.37
   6  -1   1  721.24   64.38
  -6  -1  -1  664.85   35.05
  -6  -1  -1  735.91   58.97
  -6  -1  -1  657.95   30.21
   6   1   2 1512.52   79.53
   6   1   2 1529.64  112.10
   6   1   2 1471.57   79.30
   6   1   2 1444.38   69.11
  -6   1  -2 1522.58   94.37
  -6   1  -2 1485.08  108.31
  -6  -1  -2 1687.57   85.95
   6  -1   2 1700.06   87.45
  -6  -1  -2 1678.18   69.62
  -6  -1  -2 1704.00   68.31
   6   1   3 1706.60   89.53
   6   1   3 1510.69   97.71
  -6   1  -3 1685.30  133.79
   6  -1   3 1696.44  102.13
   6  -1   3 1570.11   85.57
  -6  -1  -3 1603.56   82.48
  -6  -1  -3 1625.57   72.71
  -6  -1  -3 1635.48   70.08
   6   1   4  358.25   49.65
   6   1   4  363.11   70.10
  -6   1  -4  361.13   42.51
   6  -1   4  357.27   51.04
  -6  -1  -4  322.96   28.62
   6  -1   4  331.42   58.67
  -6  -1  -4  328.38   38.16
   6   1   5  399.69   48.57
   6   1   5  398.78   83.11
  -6   1  -5  425.32   47.16
   6  -1   5  387.76   54.49
   6  -1   5  355.76   38.38
  -6  -1  -5  365.01   27.81
   6   1   6 1269.08   91.21
  -6   1  -6 1261.01   80.62
   6   1   6 1227.23   90.60
   6  -1   6 1382.57   80.54
   6  -1   6 1464.71  150.14
  -6  -1  -6 1432.55   71.23
   6   1   7 2279.16  133.52
  -6   1  -7 1952.60  104.72
   6   1   7 2128.45  127.02
  -6   1  -7 1768.56   82.43
   6  -1   7 2209.29  135.70
  -6  -1  -7 2200.09  104.51
   6  -1   7 2207.86  140.79
   6   1   8 1962.16  123.20
   6   1   8 1821.09  148.72
  -6   1  -8 1647.65   78.25
   6  -1   8 1791.23  121.32
   6  -1   8 1616.27   93.22
  -6  -1  -8 1651.95   99.24
   6   1   9  433.97   52.41
   6   1   9  446.71   59.66
  -6   1  -9  406.95   40.90
   6  -1   9  507.22   96.29
  -6  -1  -9  401.09   33.28
   6  -1   9  466.80   40.67
   6   1  10    5.06   23.33
   6   1  10   10.49   19.70
  -6   1 -10    8.64    8.39
   6  -1  10  -14.27   24.21
   6  -1  10   -3.86   12.63
  -6  -1 -10    6.74   10.43
   6   1  11  845.63   70.53
   6   1  11  770.51   59.46
   6  -1  11  850.37   73.39
  -6  -1 -11  785.95   58.85
  -6   2  15  421.42   53.19
  -6   2  15  726.41   77.65
  -6  -2  15  596.88   89.12
  -6   2  14 1132.75   73.10
  -6   2  14 1193.93   77.36
  -6  -2  14 1096.11   65.59
  -6  -2  14 1282.20  124.48
  -6   2  13 1353.68   86.52
  -6   2  13 1397.40   87.77
   6  -2 -13 1408.39   79.97
  -6  -2  13 1333.66  104.48
  -6  -2  13 1435.31   98.87
  -6   2  12  518.42   53.24
  -6   2  12  511.36   52.32
   6  -2 -12  647.92   77.81
  -6  -2  12  574.06   51.36
  -6  -2  12  597.72   64.28
   6   2 -11 2834.40  140.25
  -6   2  11 3540.53  185.45
  -6   2  11 3577.15  180.64
   6  -2 -11 3354.18  176.28
  -6  -2  11 3330.32  178.47
  -6  -2  11 3448.05  188.05
   6   2 -10 6524.58  320.78
  -6   2  10 6915.30  362.87
  -6   2  10 7295.67  363.75
   6  -2 -10 7371.29  370.65
  -6  -2  10 7211.88  372.43
  -6  -2  10 7482.52  384.39
   6   2  -9 4237.47  211.58
  -6   2   9 4589.39  235.04
  -6   2   9 4368.15  213.93
   6  -2  -9 4353.51  224.07
  -6  -2   9 4356.96  228.27
  -6  -2   9 4275.75  226.20
  -6   2   8  417.25   38.96
   6   2  -8  419.09   44.43
  -6   2   8  435.92   50.03
  -6   2   8  370.26   31.82
  -6  -2   8  605.54   58.53
  -6  -2   8  685.84   88.88
   6  -2  -8  584.45   54.66
  -6   2   7 2695.14  129.89
   6   2  -7 2764.48  143.71
  -6   2   7 2746.18  148.88
  -6   2   7 2813.67  134.28
  -6   2   7 2773.03  168.10
  -6  -2   7 2939.09  159.58
   6  -2  -7 2978.13  151.80
  -6  -2   7 2524.04  180.43
  -6   2   6  573.13   45.34
  -6   2   6  626.60   54.21
   6   2  -6  589.06   50.90
  -6   2   6  596.79   58.49
  -6   2   6  608.66   87.60
  -6  -2   6  539.89   59.53
   6  -2  -6  557.48   52.73
   6  -2  -6  586.67   51.61
  -6  -2   6  537.22   56.60
   6  -2  -6  590.88   39.58
  -6   2   5 6157.14  309.12
   6   2  -5 6061.21  290.84
   6   2  -5 6261.03  290.61
   6   2  -5 6119.28  297.65
  -6   2   5 6200.28  296.18
  -6   2   5 5890.23  270.94
   6  -2  -5 6246.82  293.76
   6  -2  -5 5770.96  263.94
   6  -2  -5 5623.53  273.75
  -6  -2   5 6156.09  306.90
  -6  -2   5 6278.51  325.96
  -6  -2   5 6783.73  323.38
   6   2  -4  982.09   67.21
  -6   2   4 1036.63   79.39
  -6   2   4 1022.55   70.17
   6   2  -4  913.08   61.11
   6   2  -4 1036.65   73.31
  -6   2   4  939.04   52.26
   6  -2  -4 1180.79   78.71
   6  -2  -4 1129.20   56.05
   6  -2  -4 1149.51   64.26
  -6  -2   4 1173.57   78.04
   6  -2  -4 1164.78   74.81
  -6   2   3 2776.59  152.93
   6   2  -3 2991.79  139.42
  -6   2   3 2716.29  144.04
   6   2  -3 2760.41  136.95
  -6   2   3 2841.67  126.79
   6  -2  -3 2813.36  147.15
   6  -2  -3 2901.29  151.93
  -6  -2   3 2861.15  148.93
   6  -2  -3 2888.32  129.69
  -6  -2   3 2835.28  167.61
  -6  -2   3 2685.89  101.80
   6  -2  -3 2804.67  123.98
  -6   2   2 2280.97  134.59
   6   2  -2 2288.82  110.79
  -6   2   2 2209.30  165.10
   6   2  -2 2249.89  113.45
  -6   2   2 2152.52   99.04
   6  -2  -2 2312.07  167.21
   6  -2  -2 2381.89  134.25
  -6  -2   2 2412.52  124.81
   6  -2  -2 2402.61  121.90
  -6  -2   2 2218.03  136.62
  -6  -2   2 2359.92   89.67
   6  -2  -2 2474.82  124.25
  -6   2   1 5858.93  289.51
   6   2  -1 5802.38  313.88
  -6   2   1 5475.65  254.37
   6   2  -1 5792.15  281.17
   6  -2  -1 4977.98  251.30
   6  -2  -1 5255.57  226.01
   6  -2  -1 4755.75  248.03
  -6  -2   1 4936.01  236.36
  -6  -2   1 4429.93  183.82
  -6  -2   1 4760.42  203.99
  -6  -2   1 4869.41  240.23
   6  -2  -1 5061.99  224.96
   6   2   0 1480.23   62.04
  -6   2   0 1575.99   72.65
   6   2   0 1498.55   68.34
  -6   2   0 1577.45   99.46
   6   2   0 1571.95   75.30
   6   2   0 1532.54   95.57
  -6   2   0 1467.41  103.34
   6  -2   0 1411.09   67.90
  -6  -2   0 1442.18   79.05
   6  -2   0 1422.67   96.02
  -6  -2   0 1452.53   60.26
  -6  -2   0 1469.82   59.77
  -6  -2   0 1489.34   75.93
  -6  -2   0 1422.51   88.33
   6  -2   0 1493.79  101.48
   6   2   1  536.98   42.33
   6   2   1  518.88   34.90
   6   2   1  531.51   34.15
  -6   2  -1  522.53   58.78
  -6   2  -1  502.40   65.14
  -6  -2  -1  529.36   38.59
   6  -2   1  514.59   34.26
  -6  -2  -1  533.86   29.97
  -6  -2  -1  522.99   27.72
  -6  -2  -1  550.28   36.56
  -6  -2  -1  572.36   54.12
   6   2   2 2656.93  138.28
   6   2   2 2705.84  145.14
   6   2   2 2555.39  108.14
  -6   2  -2 2650.82  186.28
  -6   2  -2 2500.91  155.14
  -6  -2  -2 2471.87  129.88
   6  -2   2 2387.36  111.79
  -6  -2  -2 2469.84  120.89
  -6  -2  -2 2419.07  113.51
  -6  -2  -2 2425.06  107.98
   6   2   3  146.05   24.93
   6   2   3  152.81   38.78
  -6   2  -3  137.92   39.39
   6  -2   3    5.52   37.76
   6  -2   3  194.26   34.62
  -6  -2  -3  183.56   22.04
   6   2   4 4293.33  209.75
   6   2   4 3911.65  211.29
  -6   2  -4 4254.84  223.58
   6  -2   4 4385.81  227.65
   6  -2   4 4219.17  197.65
  -6  -2  -4 4466.73  206.90
   6   2   5  354.79   40.38
   6   2   5  371.41   83.14
  -6   2  -5  306.69   73.55
   6  -2   5  297.32   52.38
   6  -2   5  276.94   28.43
  -6  -2  -5  305.31   33.21
   6   2   6 1615.28  124.02
   6   2   6 1507.81  101.39
  -6   2  -6 1557.25   97.50
   6  -2   6 1475.06  103.65
   6  -2   6 1379.01   91.84
  -6  -2  -6 1486.97  103.46
   6   2   7  445.79   54.35
   6   2   7  418.33   59.72
  -6   2  -7  427.18   47.48
   6  -2   7  511.35   63.96
   6  -2   7  466.20   36.19
  -6  -2  -7  485.81   37.15
   6   2   8  357.00   48.58
   6   2   8  282.94   81.29
  -6   2  -8  311.78   35.89
   6  -2   8  273.29   53.19
   6  -2   8  207.34   26.22
  -6  -2  -8  256.72   30.02
   6   2   9 1777.11  111.15
   6   2   9 1646.41  107.97
   6  -2   9 1959.63  164.82
  -6  -2  -9 1652.41  104.82
   6   2  10  391.77   83.74
   6   2  10  359.64   51.07
   6  -2  10  519.35   60.26
  -6  -2 -10  428.79   34.93
   6   2  11  396.35   44.36
  -6  -2 -11  345.27   26.67
  -6   3  15  297.89   56.36
  -6   3  15  267.91   29.01
  -6  -3  15  333.67   39.79
  -6   3  14   45.74   31.86
  -6   3  14   53.80   43.90
  -6  -3  14   89.49   36.66
   6  -3 -14   36.15   18.05
  -6  -3  14   58.93   29.20
  -6   3  13 1772.30   97.08
  -6   3  13 1896.65  117.84
  -6  -3  13 1920.76  110.91
   6  -3 -13 1944.17  131.94
  -6  -3  13 1898.05  152.05
  -6   3  12 3658.85  185.41
  -6   3  12 3774.47  211.02
  -6  -3  12 3887.30  207.73
   6  -3 -12 3938.78  203.74
  -6  -3  12 4273.78  257.53
  -6   3  11 1606.37  109.95
  -6   3  11 1620.93   87.06
   6  -3 -11 1577.65  103.88
  -6  -3  11 1634.06  108.68
  -6  -3  11 1470.66  136.83
   6   3 -10 2990.61  164.51
  -6   3  10 2973.39  174.21
  -6   3  10 2868.55  144.38
   6  -3 -10 3058.24  172.11
  -6  -3  10 3201.15  178.13
  -6  -3  10 3149.25  207.48
   6   3  -9 3652.21  178.57
  -6   3   9 3669.26  205.56
  -6   3   9 3447.38  167.09
   6  -3  -9 3493.09  194.22
  -6  -3   9 3536.48  197.71
  -6  -3   9 3478.98  223.80
   6   3  -8 1382.95   80.71
  -6   3   8 1388.84  100.87
  -6   3   8 1240.34   80.32
   6  -3  -8 1236.86   90.56
  -6  -3   8 1298.32   96.33
  -6  -3   8 1140.12   81.88
   6   3  -7 5713.39  277.76
  -6   3   7 5851.32  305.55
  -6   3   7 5476.47  266.74
   6  -3  -7 5969.72  299.81
  -6  -3   7 5665.15  282.61
   6   3  -6 7430.53  341.50
  -6   3   6 7526.01  379.16
   6   3  -6 8408.93  403.02
  -6   3   6 7670.32  353.48
  -6   3   6 8596.12  485.87
  -6   3   6 8195.33  409.15
  -6  -3   6 8298.29  416.21
   6  -3  -6 7671.72  385.20
  -6  -3   6 7620.13  340.80
   6  -3  -6 7596.98  359.77
  -6  -3   6 8336.32  406.29
   6   3  -5 1397.72   82.38
   6   3  -5 1403.95   57.53
  -6   3   5 1363.55   97.85
  -6   3   5 1378.02   60.99
  -6   3   5 1357.30   97.18
   6  -3  -5 1264.33   71.67
   6  -3  -5 1227.05   75.13
  -6  -3   5 1290.33   87.97
  -6  -3   5 1214.13   57.98
  -6  -3   5 1362.86   83.99
   6  -3  -5 1125.29   52.33
  -6   3   4 1833.67  123.92
   6   3  -4 1859.75   75.66
   6   3  -4 1874.81  133.48
  -6   3   4 1797.38  117.53
   6  -3  -4 1823.19   94.06
  -6  -3   4 1740.59  103.73
   6  -3  -4 1819.81   98.71
  -6  -3   4 1755.23   71.45
  -6  -3   4 1730.63  131.88
   6   3  -3   51.18   39.35
   6   3  -3   60.46   17.23
  -6   3   3   56.43   24.39
  -6   3   3   51.34   32.94
   6  -3  -3    7.75   41.74
   6  -3  -3   20.30   15.82
  -6  -3   3   27.31   14.47
  -6  -3   3   33.55   26.19
   6   3  -2  884.60   42.74
   6   3  -2  937.50   62.36
  -6   3   2  892.70  127.38
  -6   3   2  933.95   70.49
   6  -3  -2 1124.53   53.52
  -6  -3   2 1136.65   68.72
  -6  -3   2 1104.20   47.39
  -6  -3   2 1073.97   71.08
   6   3  -1 2538.31  107.08
   6   3  -1 2521.98  122.18
  -6   3   1 2489.82  150.08
  -6   3   1 2531.79  138.28
   6  -3  -1 2349.80  108.77
  -6  -3   1 2357.26  115.62
  -6  -3   1 2396.86  100.06
  -6  -3   1 2420.46  161.40
   6   3   0 2100.19  102.81
  -6   3   0 2031.64  134.10
  -6   3   0 2010.37  123.36
  -6  -3   0 2212.05  122.43
  -6  -3   0 2104.12   90.92
  -6  -3   0 2187.73  104.40
  -6  -3   0 1976.94  110.12
   6   3   1 1977.98  111.38
  -6   3  -1 1918.64  182.87
  -6   3  -1 2047.26  171.69
  -6  -3  -1 1741.11   82.17
  -6  -3  -1 1840.77   83.68
  -6  -3  -1 1779.22  102.79
   6   3   2  688.93   41.05
   6   3   2  700.15   62.73
  -6   3  -2  768.70   84.73
  -6   3  -2  729.68   72.91
  -6  -3  -2  801.89   44.43
   6   3   3 3054.02  146.25
   6   3   3 3026.34  161.86
  -6   3  -3 3026.17  191.68
  -6   3  -3 3125.34  177.14
  -6  -3  -3 2820.17  157.32
  -6   3  -4  717.91   73.10
   6   3   4  721.98   66.72
   6   3   4  729.79   67.92
   6  -3   4  777.91   73.94
  -6  -3  -4  773.91   52.73
  -6   3  -5 4235.74  231.00
   6   3   5 4074.88  198.10
   6   3   5 3954.85  250.59
   6  -3   5 4003.25  214.78
  -6  -3  -5 3856.00  191.22
  -6   3  -6  152.59   44.47
   6   3   6  153.71   30.18
   6   3   6  168.03   41.03
   6  -3   6  155.05   43.30
  -6  -3  -6  157.85   47.87
  -6   3  -7 1053.07   83.61
   6   3   7 1122.89   74.82
   6   3   7 1094.17   85.41
   6  -3   7 1085.72  135.13
  -6  -3  -7 1131.90   64.62
  -6   3  -8 2670.46  146.42
   6   3   8 2722.18  165.94
   6   3   8 2426.04  181.79
   6  -3   8 2358.29  144.00
  -6  -3  -8 2168.52  111.95
  -6   3  -9  236.48   32.94
   6   3   9  291.29   37.86
   6   3   9  305.54   44.67
   6  -3   9  202.62   47.40
  -6  -3  -9  180.02   28.93
   6   3  10  865.26   60.66
   6   3  10  781.50   66.95
   6  -3  10  957.87   74.04
  -6  -3 -10  854.29   51.23
  -6   4  15  556.34   49.18
  -6   4  14  180.13   67.57
   6  -4 -14  133.86   25.12
  -6  -4  14  207.18   51.56
  -6  -4  14  148.87   26.78
  -6   4  13  360.69   54.55
   6  -4 -13  298.85   61.60
  -6  -4  13  305.46   45.41
  -6  -4  13  280.29   36.82
  -6   4  12  851.57   83.51
   6  -4 -12  886.33   71.68
  -6  -4  12  869.65   75.48
  -6  -4  12  835.66   61.73
  -6   4  11 1023.60   87.52
   6  -4 -11  767.93   73.51
  -6  -4  11  788.07   76.41
  -6  -4  11  761.56   60.97
   6   4 -10 1415.40   72.99
  -6   4  10 1720.42  121.34
   6  -4 -10 1732.26  116.83
  -6  -4  10 1836.17  121.29
  -6  -4  10 1762.49  100.98
   6   4  -9 3888.87  174.43
   6   4  -9 4075.39  192.60
  -6   4   9 4119.94  235.51
   6  -4  -9 3725.64  210.37
  -6  -4   9 3872.59  217.90
  -6  -4   9 3881.92  196.84
   6   4  -8  198.53   20.65
   6   4  -8  217.87   29.21
  -6   4   8  221.57   55.31
   6  -4  -8  214.51   46.75
  -6  -4   8  253.52   51.13
  -6  -4   8  253.43   37.09
   6   4  -7 5511.41  260.30
   6   4  -7 5258.35  252.52
  -6   4   7 5492.20  357.07
   6  -4  -7 5162.00  273.15
  -6  -4   7 5422.70  286.06
  -6  -4   7 5686.19  277.06
   6   4  -6 2039.09  101.67
   6   4  -6 1995.17  102.65
  -6   4   6 2059.38  187.86
   6  -4  -6 1255.27   89.68
  -6  -4   6 2018.01  120.02
  -6  -4   6 2132.84  109.89
   6   4  -5  207.05   20.76
   6   4  -5  200.61   34.10
  -6   4   5  225.99   54.28
  -6   4   5  193.22   24.36
   6  -4  -5  211.83   34.53
  -6  -4   5  252.49   41.64
  -6  -4   5  240.96   55.86
   6   4  -4 1778.80   79.15
   6   4  -4 1678.62   93.57
  -6   4   4 1753.82  123.02
  -6   4   4 1699.40   90.36
   6  -4  -4 1502.94   83.98
  -6  -4   4 1722.94  100.22
  -6  -4   4 1570.11   90.61
   6   4  -3  996.14   63.82
   6   4  -3  952.70   65.77
  -6   4   3  927.12   87.64
  -6   4   3  944.37   63.11
   6  -4  -3  857.06   49.86
  -6  -4   3 1022.48   90.64
  -6  -4   3  953.14   65.57
   6   4  -2 1853.41   83.26
   6   4  -2 1982.74  104.15
  -6   4   2 2051.43  183.68
  -6   4   2 1920.67  138.79
   6  -4  -2 1645.59   76.50
  -6  -4   2 1801.92   93.09
  -6  -4   2 1747.54  127.56
   6   4  -1  758.84   43.44
   6   4  -1  786.79   84.08
  -6   4   1  735.09   82.08
  -6   4   1  791.52   99.34
  -6  -4   1  764.33   46.70
  -6  -4   1  754.25   57.07
   6   4   0 1046.90   55.10
   6   4   0 1045.12   64.47
  -6   4   0 1089.13   94.20
  -6   4   0 1090.98   81.80
  -6  -4   0  928.17   66.75
   6   4   1  319.28   34.70
  -6   4  -1  329.43  104.71
  -6   4  -1  338.01   55.01
  -6  -4  -1  391.81   32.74
   6   4   2  827.98   50.34
   6   4   2  816.91   63.29
  -6   4  -2  858.72   88.80
  -6   4  -2  823.59   78.66
  -6  -4  -2  729.43   49.13
   6   4   3 3281.00  169.38
   6   4   3 3241.31  170.79
  -6   4  -3 3294.17  204.52
  -6   4  -3 3344.73  243.32
  -6  -4  -3 3396.86  160.37
  -6   4  -4 1541.25  115.49
   6   4   4 1403.50   67.71
   6   4   4 1556.24  131.54
   6  -4   4 1398.37   99.78
  -6  -4  -4 1406.80  110.53
   6   4   5   83.56   32.77
  -6   4  -5   83.98   44.46
   6  -4   5   90.02   37.01
  -6  -4  -5   80.74   29.74
   6   4   6 1262.27   85.85
  -6   4  -6 1246.79  101.58
   6  -4   6 1174.80   87.74
  -6  -4  -6 1165.71   79.28
   6   4   7  348.91   75.64
  -6   4  -7  387.69   97.71
   6  -4   7  342.93   88.33
  -6  -4  -7  378.04   68.29
  -6   4  -8   60.25   34.13
   6   4   8   52.12   19.04
   6   4   8   50.08   28.51
   6  -4   8   68.08   32.55
  -6  -4  -8   54.93   21.53
  -6   4  -9  658.34   58.04
   6   4   9  673.52   45.99
   6   4   9  677.43   58.09
   6  -4   9  973.29   98.45
  -6  -4  -9  817.23   51.37
   6   4  10 1120.46   97.20
   6  -4  10 1151.75   70.78
  -6  -4 -10  904.97   54.92
  -6   5  14  468.44   55.90
   6  -5 -14  382.74   35.18
  -6  -5  14  414.66   75.13
  -6   5  13 1062.57  131.25
   6  -5 -13 1107.53  101.00
  -6  -5  13 1112.36   80.57
  -6  -5  13  879.95   56.54
   6   5 -12 1642.50   91.93
  -6   5  12 2067.00  181.63
   6  -5 -12 1921.32  116.56
  -6  -5  12 1976.36  122.36
  -6  -5  12 1812.56   98.50
   6   5 -11  905.82   48.43
  -6   5  11  923.52  140.92
   6  -5 -11 1109.15   86.85
  -6  -5  11 1137.65   88.21
   6   5 -10  434.94   30.45
  -6   5  10  535.92  110.87
   6  -5 -10  316.28   56.17
  -6  -5  10  373.68   59.87
  -6  -5  10  297.07   33.16
   6   5  -9  817.29   60.69
   6   5  -9  748.37   58.68
  -6   5   9  796.88  140.82
   6  -5  -9  784.69   78.34
  -6  -5   9  846.42   80.31
  -6  -5   9  824.17   72.12
   6   5  -8  520.03   51.89
   6   5  -8  537.46   41.04
   6  -5  -8  476.50   62.99
  -6  -5   8  555.80   67.23
  -6  -5   8  540.74   61.70
   6   5  -7 6641.69  330.12
   6   5  -7 6286.22  303.17
  -6   5   7 6256.31  352.97
  -6  -5   7 6568.94  340.15
  -6  -5   7 6374.71  336.02
   6   5  -6 1497.52   75.11
   6   5  -6 1365.23   80.93
  -6   5   6 1380.10  117.43
  -6  -5   6 1361.74   95.38
  -6  -5   6 1348.37   76.77
   6   5  -5   24.43   14.63
   6   5  -5   20.85   21.17
  -6   5   5   27.48   37.14
   6  -5  -5   -6.42   19.16
  -6  -5   5   33.17   24.25
  -6  -5   5   23.52   17.37
   6   5  -4  463.01   33.58
   6   5  -4  488.19   73.45
  -6   5   4  507.69   70.75
  -6   5   4  444.38   34.09
   6  -5  -4  237.76   34.27
  -6  -5   4  406.13   43.63
  -6  -5   4  394.71   37.62
   6   5  -3  163.43   35.35
   6   5  -3  173.25   53.49
  -6   5   3  161.46   81.53
  -6   5   3  168.14   26.28
   6  -5  -3   56.61   18.94
  -6  -5   3   94.95   41.43
  -6  -5   3   90.04   39.35
   6   5  -2  337.99   32.48
   6   5  -2  341.50   44.76
  -6   5   2  342.58   65.81
  -6   5   2  339.97   40.74
  -6  -5   2  443.65   33.99
  -6  -5   2  387.46   35.65
   6   5  -1 1162.82   64.16
   6   5  -1 1152.80   74.36
  -6   5   1 1206.80  104.16
  -6   5   1 1201.20   81.17
  -6  -5   1 1145.07   68.24
   6   5   0 2425.19  117.95
   6   5   0 2571.39  131.06
  -6   5   0 2511.49  161.56
  -6   5   0 2563.63  146.13
   6   5   1 1337.84   78.36
   6   5   1 1272.07   75.26
  -6   5  -1 1234.12  156.87
  -6   5  -1 1304.50  136.89
  -6  -5  -1 1282.96   74.20
   6   5   2 2865.87  163.82
   6   5   2 2812.46  143.37
  -6   5  -2 2816.72  178.76
  -6   5  -2 3071.68  231.73
  -6  -5  -2 2926.27  143.27
   6   5   3   19.77   16.68
   6   5   3   66.89   36.79
  -6   5  -3   35.41   37.01
  -6   5  -3   24.50   37.55
  -6  -5  -3   30.80   20.97
  -6   5  -4  449.36   68.04
   6   5   4  412.62   32.43
   6   5   4  417.88   43.13
   6  -5   4  420.47   53.52
  -6  -5  -4  367.21   71.91
  -6   5  -5  356.99   60.51
   6   5   5  288.17   22.30
   6   5   5  334.71   39.02
   6  -5   5  205.09   44.04
  -6  -5  -5  198.94   42.99
   6   5   6 1806.54  102.34
  -6   5  -6 1800.54  179.47
   6  -5   6 1972.59  112.82
  -6  -5  -6 1866.78  109.95
   6   5   7   80.63   27.77
  -6   5  -7  116.52   46.20
   6  -5   7  159.50   33.95
  -6  -5  -7  128.85   50.30
   6   5   8  932.01   62.82
  -6   5  -8  937.51   82.54
   6  -5   8 1089.18   70.69
  -6  -5  -8 1028.58   61.65
   6   5   9  100.88   39.05
  -6   5  -9  125.85   62.64
   6  -5   9  104.25   25.18
  -6  -5  -9   95.07   22.58
  -6   6  13  258.49   52.48
   6  -6 -13  263.46   59.12
  -6  -6  13  271.59   74.91
   6   6 -12  816.16   44.94
  -6   6  12  934.57   88.56
   6  -6 -12  998.23   74.51
  -6  -6  12 1022.70   79.68
   6   6 -11  202.01   24.84
  -6   6  11  239.86   57.26
   6  -6 -11  191.24   43.84
  -6  -6  11  198.66   47.84
   6   6 -10  367.26   31.36
  -6   6  10  387.04   70.91
   6  -6 -10  479.33   59.08
  -6  -6  10  506.27   61.01
   6   6  -9 1980.19   97.11
  -6   6   9 1899.13  145.97
   6  -6  -9 1816.79  123.84
  -6  -6   9 2257.81  136.03
   6   6  -8 2824.63  131.63
   6   6  -8 2544.32  120.67
   6  -6  -8 2158.64  139.08
  -6  -6   8 2894.55  163.05
   6   6  -7 1093.41   61.90
   6   6  -7 1059.52   61.70
  -6   6   7 1103.13  102.62
  -6  -6   7 1106.49   85.79
   6   6  -6  955.15   57.39
   6   6  -6  964.47   60.01
  -6   6   6 1012.31   98.61
  -6  -6   6  929.35   74.09
   6   6  -5 1390.76   75.11
   6   6  -5 1245.93   77.47
  -6  -6   5 1415.96   86.35
   6   6  -4 3146.55  149.92
   6   6  -4 3083.52  156.12
  -6   6   4 3181.33  253.82
  -6  -6   4 2998.17  155.83
   6   6  -310247.74  525.29
   6   6  -310183.18  505.53
  -6   6   310195.91  618.38
  -6  -6   3 9152.46  484.22
   6   6  -2 2730.09  137.17
   6   6  -2 2795.04  148.20
  -6   6   2 2928.99  183.94
  -6   6   2 2884.10  171.35
   6   6  -1 3320.71  161.63
   6   6  -1 3133.97  163.70
  -6   6   1 3112.16  191.73
  -6   6   1 3277.88  204.41
   6   6   0 1715.72   93.04
   6   6   0 1675.09  132.54
   6   6   0 1597.68   81.89
  -6   6   0 1666.69  169.68
  -6   6   0 1796.20  110.70
   6   6   1  760.08   86.44
   6   6   1  755.00   46.94
  -6   6  -1  767.95   83.62
  -6   6  -1  786.51   73.42
  -6  -6  -1  816.73   58.66
   6   6   2  182.23   31.62
   6   6   2  163.39   36.19
  -6   6  -2  178.68   48.93
  -6   6  -2  176.39   47.76
  -6  -6  -2  136.71   32.59
   6   6   3 2036.59  103.58
   6   6   3 1918.40   95.60
  -6   6  -3 1996.99  135.48
  -6  -6  -3 1933.25  107.71
  -6   6  -4   -7.89   35.56
   6   6   4   10.37   25.80
   6   6   4   15.45   14.97
   6  -6   4   55.10   23.62
  -6  -6  -4   65.90   42.71
  -6   6  -5  184.53   98.89
   6   6   5  185.83   21.59
   6   6   5  190.26   39.70
   6  -6   5  277.90   36.86
  -6  -6  -5  283.38   43.38
   6   6   6  307.70   30.84
  -6   6  -6  361.76   66.26
   6  -6   6  466.23   66.07
  -6  -6  -6  443.22   49.14
   6   6   7  417.47   32.54
  -6   6  -7  485.75   66.28
   6  -6   7  376.46   38.78
  -6  -6  -7  345.69   67.03
  -6   6  -8  282.91   83.93
  -6  -6  -8  279.71   31.35
   6   7 -11   16.92   12.26
  -6   7  11    4.22   32.25
   6  -7 -11   47.77   26.25
  -6  -7  11   38.92   27.63
   6   7 -10 1125.16   60.72
  -6   7  10 1183.94  100.12
   6  -7 -10 1110.75   85.88
  -6  -7  10 1164.13   85.53
   6   7  -9  542.69   40.32
  -6   7   9  563.69   73.47
   6  -7  -9  469.65   57.47
  -6  -7   9  542.03   58.02
   6   7  -8  589.41   43.20
  -6   7   8  595.68   77.99
   6  -7  -8  532.47   59.20
  -6  -7   8  762.00   63.87
   6   7  -7 2166.39  105.84
   6   7  -7 2140.94  117.93
  -6   7   7 2227.70  145.94
   6  -7  -7 1512.38  103.44
  -6  -7   7 2310.66  125.09
   6   7  -6  391.21   36.35
   6   7  -6  362.54   50.81
  -6   7   6  371.44   62.12
   6  -7  -6  162.45   35.81
  -6  -7   6  360.04   40.91
   6   7  -5  207.60   44.95
   6   7  -5  195.93   27.08
   6  -7  -5   28.25   23.12
  -6  -7   5   87.24   38.40
   6   7  -4 2679.52  160.23
   6   7  -4 2584.48  162.73
  -6   7   4 2562.59  167.12
   6   7  -3  563.67   51.10
   6   7  -3  572.94   80.41
  -6   7   3  554.54   72.77
   6   7  -2 5219.88  254.28
   6   7  -2 5071.40  287.80
  -6   7   2 5265.57  290.30
   6   7  -1 1484.89   87.79
   6   7  -1 1514.93   92.91
  -6   7   1 1861.21  162.38
  -6   7   1 1417.50   82.60
   6   7   0 1709.23  100.33
  -6   7   0 1696.13  118.27
  -6   7   0 1721.29  102.87
   6   7   1 3811.39  189.48
  -6   7  -1 3739.91  213.05
  -6   7  -1 3660.53  233.39
  -6  -7  -1 3876.48  191.39
   6   7   2 1580.09   90.83
  -6   7  -2 1547.39  106.83
  -6   7  -2 1595.33  144.10
  -6  -7  -2 1567.97   93.39
   6   7   3 3345.38  190.72
  -6   7  -3 3621.14  257.83
   6  -7   3 3520.16  174.90
  -6  -7  -3 3612.60  180.42
   6   7   4   87.39   22.00
  -6   7  -4   93.66   43.60
   6  -7   4   93.88   23.90
   6   7   5  422.98   30.74
  -6   7  -5  472.11   66.59
  -6  -7  -5  476.11   51.30
   6   7   6 1585.61   71.84
  -6   7  -6 2057.24  130.88
  -6  -7  -6 2051.00  111.53
  -6   7  -7  646.24  123.20
   6   8 -10   18.72   20.96
  -6   8  10   28.16   46.52
   6  -8 -10    6.18   21.46
  -6  -8  10   19.08   35.26
   6   8  -9 2003.08  120.42
   6  -8  -9 2146.96  122.78
  -6  -8   9 2300.69  149.48
   6   8  -8 1343.23   96.27
   6  -8  -8 1195.19   81.01
  -6  -8   8 1295.78  102.45
   6   8  -7  207.65   46.05
   6   8  -7  128.82   16.55
  -6   8   7  227.31   76.27
   6  -8  -7  157.42   30.60
  -6  -8   7  205.65   44.01
   6   8  -6   24.13   27.78
   6   8  -6   10.10   11.83
  -6   8   6   23.41   25.81
   6  -8  -6    4.90   13.99
  -6  -8   6  -17.35   20.67
   6   8  -5  621.96   46.43
   6   8  -5  598.26   41.39
  -6   8   5  603.27   64.02
   6  -8  -5  357.40   32.92
   6   8  -4  132.04   29.90
   6   8  -4  132.27   26.25
  -6   8   4  132.86   40.25
   6   8  -3  870.66   61.67
   6   8  -3  847.34   58.25
  -6   8   3  843.85   71.88
   6   8  -2  298.15   38.80
   6   8  -2  318.20   39.24
  -6   8   2  271.84   75.96
   6   8  -1 4763.66  230.95
  -6   8   1 4699.54  250.72
   6   8   0 2879.64  145.79
  -6   8   0 2960.71  160.86
  -6  -8   0 2644.33  141.90
   6   8   1  995.12   98.12
  -6   8  -1  965.57   67.07
  -6  -8  -1  919.18   68.09
   6   8   2 3715.62  177.20
  -6   8  -2 3717.67  191.79
  -6  -8  -2 3215.40  167.35
   6   8   3  580.19   45.41
  -6   8  -3  610.58   59.35
  -6  -8  -3  468.61   87.68
   6   8   4  330.12   32.95
  -6   8  -4  330.02   50.52
  -6  -8  -4  370.15   47.45
   6   8   5  238.99   33.00
  -6   8  -5  317.24   85.57
   6   9  -7  670.78   45.76
  -6   9   7  650.20   53.17
   6   9  -6  111.39   25.27
  -6   9   6  114.81   29.62
   6   9  -5  882.07   58.36
   6   9  -5  901.04   61.96
  -6   9   5  913.73   93.11
   6   9  -4  520.24   44.43
   6   9  -4  521.21   53.60
  -6   9   4  555.27   74.35
   6   9  -3  125.67   38.22
  -6   9   3  118.02   26.99
   6   9  -2  188.25   44.51
  -6   9   2  128.41   26.51
  -6  -9   2  196.92   35.24
   6   9  -1  367.99   37.74
  -6  -9   1  386.70   45.04
   6   9   0  384.24   40.68
  -6  -9   0  518.96   49.73
   6   9   1 2037.31  104.35
  -6  -9  -1 2083.87  110.97
   6   9   2  606.64   46.69
  -7   0  15  811.93   68.96
  -7   0  14   29.39   49.68
   7   0 -13  114.62   31.74
  -7   0  13  667.50   80.46
   7   0 -12 1377.71  107.18
  -7   0  12 1791.23  151.54
   7   0 -11  864.58   66.85
  -7   0  11  853.31   57.97
  -7   0  11  942.57   77.65
   7   0 -10  351.85   45.42
  -7   0  10  381.41   40.76
  -7   0  10  350.91   85.76
   7   0  -9  148.60   35.42
  -7   0   9  143.47   32.19
  -7   0   9  119.18   65.75
   7   0  -8 1570.00   98.82
  -7   0   8 1609.21   96.94
  -7   0   8 1415.49  132.78
   7   0  -7 1880.24  108.17
  -7   0   7 1858.42  111.19
  -7   0   7 2109.79  117.52
   7   0  -6  296.28   41.41
  -7   0   6  304.16   45.61
  -7   0   6  306.98   43.35
   7   0  -5  538.40   44.97
   7   0  -5  524.74   47.74
  -7   0   5  485.05   36.15
  -7   0   5  513.63   57.15
  -7   0   5  550.53   52.03
   7   0  -4  279.00   26.22
   7   0  -4  289.21   35.54
  -7   0   4  274.36   28.35
  -7   0   4  277.04   76.08
  -7   0   4  266.41   64.13
   7   0  -3   25.95   16.11
   7   0  -3   36.77   33.67
  -7   0   3   51.15   18.19
  -7   0   3   50.45   51.81
  -7   0   3   41.70   26.42
   7   0  -2 4300.24  204.43
   7   0  -2 4215.69  194.52
  -7   0   2 4337.89  235.41
  -7   0   2 4329.78  221.80
  -7   0   2 4222.75  205.43
   7   0  -1 4496.13  213.97
   7   0  -1 4528.79  202.56
  -7   0   1 4230.20  211.37
  -7   0   1 4398.40  224.50
  -7   0   1 4235.41  238.36
   7   0   0  235.79   28.74
  -7   0   0  233.49   38.19
  -7   0   0  264.91   67.69
  -7   0   0  243.65   36.40
   7   0   1   36.51   21.69
  -7   0  -1   51.09   27.18
  -7   0  -1   60.70   25.49
   7   0   2 3794.09  185.46
   7   0   2 3525.43  181.02
  -7   0  -2 3637.32  184.63
   7   0   317790.58  937.03
   7   0   317107.58  914.88
  -7   0  -316697.65  936.74
   7   0   411632.59  629.46
   7   0   410889.72  603.14
  -7   0  -411005.39  570.91
   7   0   5 3026.21  166.42
   7   0   5 2971.31  156.67
  -7   0  -5 2705.64  154.35
   7   0   6  167.75   42.35
   7   0   6  159.54   36.24
   7   0   7  450.00   58.38
   7   0   7  450.53   73.74
   7   0   8  922.75  123.78
   7   0   8  939.98   66.26
   7   0   9  463.21   58.27
   7   0   9  469.82   43.71
   7   0  10   95.36   34.83
   7   0  10   92.01   22.70
  -7   1  15  451.57   48.48
  -7  -1  15  364.05   53.25
  -7   1  14   94.46   45.21
   7  -1 -14   -0.65   24.43
  -7  -1  14  106.97   54.13
  -7   1  13  189.06   67.61
   7  -1 -13  163.86   29.97
  -7  -1  13  249.02   28.08
  -7  -1  13  270.82   78.19
   7   1 -12  678.60   51.56
  -7   1  12  940.21  105.28
   7  -1 -12  962.15   67.61
  -7  -1  12 1115.20   68.02
  -7  -1  12  954.88  121.47
  -7   1  11 1341.33   90.34
   7   1 -11 1246.31   81.07
  -7  -1  11 1248.17  137.01
   7  -1 -11 1239.82   83.18
  -7   1  10 2206.79  136.33
   7   1 -10 2383.39  168.04
  -7   1  10 2300.08  167.36
  -7  -1  10 2560.30  139.84
   7  -1 -10 2545.86  138.67
  -7  -1  10 2471.92  193.73
   7   1  -9  631.64   88.74
  -7   1   9  666.78   70.04
  -7   1   9  634.02   48.00
  -7   1   9  574.53   86.25
  -7  -1   9  809.51  102.16
   7  -1  -9  776.72   63.07
  -7  -1   9  760.29  109.50
   7   1  -8  908.56  100.62
  -7   1   8  888.16   85.59
  -7   1   8  888.61   59.68
  -7   1   8  976.87   96.67
   7  -1  -8  897.29   69.60
  -7  -1   8  927.19   77.53
  -7  -1   8 1098.32  118.56
   7   1  -7  409.20   74.76
  -7   1   7  405.43   68.56
  -7   1   7  403.99   39.38
  -7   1   7  406.63   43.04
   7  -1  -7  366.65   75.92
  -7  -1   7  354.26   52.30
  -7  -1   7  376.26   54.47
   7   1  -6  176.44   62.67
  -7   1   6  225.39   64.12
  -7   1   6  177.77   32.72
  -7   1   6  175.57   34.24
   7  -1  -6  345.08   39.17
  -7  -1   6  334.37   46.64
  -7  -1   6  343.12   48.18
  -7   1   5 2652.71  161.05
  -7   1   5 2683.64  133.11
   7   1  -5 2568.54  170.32
  -7   1   5 2541.28  177.36
   7  -1  -5 2670.76  150.97
  -7  -1   5 2613.18  147.86
  -7  -1   5 2847.75  149.13
   7  -1  -5 2608.28  129.99
  -7   1   4 5940.48  294.98
  -7   1   4 5749.55  304.44
   7   1  -4 6215.21  299.60
  -7   1   4 6261.05  310.62
   7  -1  -4 5918.65  286.70
  -7  -1   4 6140.42  309.48
  -7  -1   4 6061.80  343.08
   7  -1  -4 6090.98  285.98
  -7   1   3 4778.10  243.82
  -7   1   3 5041.71  238.91
   7   1  -3 4876.28  232.38
  -7   1   3 4200.75  219.32
   7  -1  -3 5212.70  269.46
  -7  -1   3 5020.17  251.70
   7  -1  -3 5106.68  245.20
   7  -1  -3 5168.39  237.67
  -7  -1   3 4714.34  245.20
  -7   1   2 4057.02  209.72
   7   1  -2 4161.73  195.64
  -7   1   2 3978.64  211.54
  -7   1   2 3985.08  192.23
   7  -1  -2 4256.55  209.95
   7  -1  -2 4637.89  214.75
  -7  -1   2 4820.15  237.29
  -7  -1   2 4299.96  255.50
   7   1  -1 3501.47  157.43
   7   1  -1 3533.90  178.90
  -7   1   1 3341.05  222.26
  -7   1   1 3537.90  222.12
  -7   1   1 3419.40  159.68
   7  -1  -1 2982.70  133.43
  -7  -1   1 3291.06  205.78
  -7  -1   1 3370.41  172.10
   7   1   0 2298.12  105.61
   7   1   0 2294.63  129.14
   7   1   0 2397.19  105.51
  -7   1   0 2321.63  138.71
  -7   1   0 2366.46  134.80
  -7   1   0 2272.57  112.84
  -7  -1   0 2268.40  124.01
  -7  -1   0 2437.13  131.52
   7   1   1 7472.86  350.79
   7   1   1 6652.02  299.77
  -7   1  -1 6869.94  367.99
  -7   1  -1 7339.64  369.75
  -7  -1  -1 7333.81  387.42
  -7  -1  -1 7754.28  378.42
   7   1   2 1205.41   68.98
   7   1   2 1054.77   81.68
  -7   1  -2 1230.15   88.42
   7  -1   2 1401.83   89.93
   7  -1   2 1347.92   75.86
  -7  -1  -2 1423.49   79.78
   7   1   3 1433.72   99.08
   7   1   3 1490.85  116.64
  -7   1  -3 1517.89   98.85
   7  -1   3 1829.14  108.68
  -7  -1  -3 1761.77  109.77
   7  -1   3 1706.04   93.79
   7   1   4  211.23   34.67
   7   1   4  195.92   43.95
  -7   1  -4  200.41   36.04
   7  -1   4  186.00   42.86
   7  -1   4  146.53   48.30
   7   1   5  303.21   49.03
   7   1   5  358.11   44.64
  -7   1  -5  318.17   60.43
   7  -1   5  319.41   36.57
   7  -1   5  357.92   82.80
   7   1   6  406.94   48.95
   7   1   6  386.84   51.21
  -7   1  -6  342.19   38.23
   7  -1   6  394.99   58.54
   7  -1   6  373.75   39.15
   7   1   7  796.84  108.53
   7   1   7  802.57   70.50
   7  -1   7  968.82   82.37
   7  -1   7  803.92   56.26
   7   1   8  332.17   47.03
   7   1   8  280.02   42.42
   7  -1   8  230.26   78.43
   7  -1   8  203.78   30.44
   7   1   9 1416.78   92.41
   7   1   9 1181.86   79.04
   7  -1   9 1419.82   96.97
   7  -1   9 1223.57   85.45
  -7  -1  -9 1158.20   54.40
   7   1  10  525.75   82.63
   7   1  10  299.66   63.27
   7  -1  10  386.43   53.43
  -7   2  15  154.04   28.70
  -7  -2  15  179.32   38.47
  -7   2  14 2871.34  172.19
  -7  -2  14 2479.33  130.79
  -7  -2  14 2690.16  150.89
  -7   2  13  482.82   41.46
  -7   2  13  517.69   67.60
   7  -2 -13  363.46   42.17
  -7  -2  13  429.72   43.95
  -7  -2  13  423.31   57.94
   7   2 -12 2254.08  110.15
  -7   2  12 2559.35  160.98
  -7   2  12 2597.92  163.50
   7  -2 -12 2616.16  140.45
  -7  -2  12 2679.96  174.56
  -7  -2  12 2740.46  201.08
   7   2 -11 2636.04  135.16
  -7   2  11 2611.72  170.77
  -7   2  11 2569.24  163.95
   7  -2 -11 2643.72  187.34
  -7  -2  11 2609.01  185.96
  -7  -2  11 2520.52  196.77
  -7   2  10  351.03   61.23
   7   2 -10  353.21   42.86
  -7   2  10  364.25   69.03
   7  -2 -10  418.97   82.09
  -7  -2  10  391.39   58.85
   7   2  -9 8074.95  411.20
  -7   2   9 8100.97  429.30
   7  -2  -9 7791.30  440.11
  -7  -2   9 8080.71  469.49
  -7  -2   9 7796.66  409.12
  -7   2   8  449.04   41.59
   7   2  -8  485.48   53.92
  -7   2   8  523.39   52.27
  -7   2   8  496.45   41.13
  -7  -2   8  686.04  102.98
  -7  -2   8  648.30   63.79
   7  -2  -8  704.43   62.41
  -7   2   7  817.85   54.30
   7   2  -7  840.89   68.24
  -7   2   7  840.00   68.64
  -7   2   7  838.40   58.15
  -7  -2   7 1072.96  122.12
  -7  -2   7 1008.40   78.93
   7  -2  -7 1072.56   72.76
  -7   2   6 3445.64  172.18
   7   2  -6 3444.30  177.12
  -7   2   6 3704.38  190.86
  -7   2   6 3284.37  157.88
   7  -2  -6 3139.05  160.09
  -7  -2   6 3542.83  187.01
  -7   2   5 2731.74  150.40
   7   2  -5 2999.41  156.25
  -7   2   5 2762.56  155.63
  -7   2   5 2983.04  155.70
  -7  -2   5 2946.79  163.46
  -7  -2   5 3366.80  210.90
   7  -2  -5 3061.60  174.11
  -7   2   4  791.50   48.19
   7   2  -4  888.31   63.76
  -7   2   4  876.19  104.71
  -7   2   4  811.89   66.71
  -7  -2   4  806.66   70.73
  -7  -2   4  767.61   69.41
   7  -2  -4  852.06   76.36
  -7   2   3  143.70   40.40
   7   2  -3  138.87   30.59
  -7   2   3  178.80   61.20
  -7   2   3  154.31   20.93
   7  -2  -3  107.77   21.42
   7  -2  -3  108.35   20.02
  -7  -2   3   98.20   39.59
  -7  -2   3  107.79   35.33
  -7   2   2 1853.78  118.20
   7   2  -2 1783.44  119.43
  -7   2   2 1856.09  154.01
  -7   2   2 1741.50   98.82
   7  -2  -2 1769.35   83.34
   7  -2  -2 1761.90  100.10
  -7  -2   2 1793.05  107.51
  -7  -2   2 1909.79  139.56
   7   2  -1 8790.48  410.05
  -7   2   1 8401.67  481.56
  -7   2   1 8042.71  382.62
  -7   2   1 8323.43  424.45
  -7  -2   1 7696.69  431.99
  -7  -2   1 8628.78  421.98
   7   2   0 5258.52  240.33
  -7   2   0 5289.43  286.35
  -7   2   0 5218.28  274.03
  -7  -2   0 5659.02  270.13
  -7  -2   0 5684.44  282.13
   7   2   1  228.54   34.65
  -7   2  -1  212.52   49.21
  -7   2  -1  229.24   55.03
  -7  -2  -1  294.29   47.50
   7  -2   1  272.62   26.12
  -7  -2  -1  287.91   46.66
   7   2   2  220.02   25.36
   7   2   2  258.71   49.58
  -7   2  -2  264.42   85.71
  -7   2  -2  256.69   60.35
  -7  -2  -2  377.07   29.87
   7  -2   2  347.31   28.81
   7   2   3  748.27   48.83
   7   2   3  720.41   69.13
  -7   2  -3  751.09   70.88
   7  -2   3  754.38   70.76
   7  -2   3  680.12   57.75
   7   2   4  465.24   41.17
   7   2   4  452.43   58.21
  -7   2  -4  446.65   60.09
   7  -2   4  439.94   58.50
   7  -2   4  375.47   31.55
  -7  -2  -4  368.59   41.21
   7   2   5 5267.37  274.04
   7   2   5 4849.30  248.62
  -7   2  -5 5049.51  297.64
   7  -2   5 4668.18  245.05
   7  -2   5 4048.06  198.55
  -7  -2  -5 4168.70  192.54
  -7   2  -6 1102.23   75.67
   7   2   6 1182.13   74.64
   7   2   6 1112.47   84.61
   7  -2   6  998.70  134.17
  -7  -2  -6  846.92   47.27
  -7   2  -7 1923.40  132.44
   7   2   7 2083.70  115.69
   7   2   7 2113.76  125.03
   7  -2   7 2039.13  129.74
  -7  -2  -7 1668.67   80.68
   7   2   8  832.72   61.67
   7   2   8  783.17   67.17
   7  -2   8  801.99   75.51
  -7  -2  -8  597.61   37.76
   7   2   9  246.00   61.02
   7   2   9  247.13   41.84
   7  -2   9  260.15   82.27
  -7  -2  -9  201.17   20.33
  -7  -3  15  463.97   46.31
  -7   3  14   60.42   23.38
  -7   3  14   52.23   17.30
   7  -3 -14   42.48   21.42
  -7  -3  14   95.86   23.22
  -7  -3  14   94.79   30.56
  -7   3  13  662.80   58.71
  -7   3  13  539.09   41.87
   7  -3 -13  742.38   56.64
  -7  -3  13  791.12   88.51
  -7  -3  13  742.00   65.15
  -7   3  12  361.52   71.99
  -7   3  12  311.74   31.76
   7  -3 -12  317.88   74.61
  -7  -3  12  316.50   76.02
  -7  -3  12  302.86   47.38
   7   3 -11 1180.36   80.24
  -7   3  11 1189.51  121.44
  -7   3  11 1137.54   65.02
   7  -3 -11 1150.91  118.76
  -7  -3  11 1203.27   88.85
  -7  -3  11 1135.50   85.80
   7   3 -10 2736.28  162.39
  -7   3  10 2652.00  198.97
  -7   3  10 2356.91  122.49
   7  -3 -10 3048.43  167.15
  -7  -3  10 3204.37  177.06
  -7  -3  10 2852.04  160.11
   7   3  -9 3413.39  203.78
  -7   3   9 3076.93  152.50
   7  -3  -9 3580.92  194.14
  -7  -3   9 3780.64  207.72
  -7  -3   9 3874.83  203.00
   7   3  -8 2461.96  135.59
  -7   3   8 2404.71  147.58
   7  -3  -8 2387.39  138.49
  -7  -3   8 2435.15  150.99
  -7  -3   8 2420.33  140.90
   7   3  -7 3251.01  168.45
  -7   3   7 3041.15  179.92
  -7   3   7 3173.58  173.13
   7  -3  -7 3287.29  173.02
  -7  -3   7 3416.83  191.68
  -7  -3   7 3374.13  180.59
   7   3  -6  941.54   69.64
  -7   3   6  923.24   83.25
  -7   3   6  978.15   84.23
   7  -3  -6  886.43   65.12
  -7  -3   6  878.16  121.13
  -7  -3   6  865.45  107.65
   7   3  -5  618.28   83.69
  -7   3   5  638.97   66.52
  -7   3   5  623.78   72.47
   7  -3  -5  448.58   44.14
  -7  -3   5  543.93   96.75
  -7  -3   5  355.83   87.40
   7   3  -4 9946.68  520.15
  -7   3   4 9941.60  569.93
  -7   3   410121.27  505.19
   7  -3  -4 9266.05  452.43
  -7  -3   4 9474.43  481.70
  -7  -3   4 8996.33  463.33
   7   3  -3 1042.01   69.12
  -7   3   3 1082.08   93.60
  -7   3   3 1015.26   77.61
   7  -3  -3 1036.90   73.07
  -7  -3   3 1174.21   78.36
  -7  -3   3 1167.67   90.69
   7   3  -2 1805.44   96.20
  -7   3   2 1607.39  119.21
  -7   3   2 1800.27  111.57
   7  -3  -2 1784.35   81.29
  -7  -3   2 1825.03  100.77
  -7  -3   2 1979.29  153.11
   7   3  -1 2256.93  112.75
  -7   3   1 2125.09  141.96
  -7   3   1 2221.14  133.31
  -7  -3   1 2180.75  134.94
  -7  -3   1 2126.36  121.40
   7   3   0   24.58   26.10
  -7   3   0   26.52   57.78
  -7   3   0    3.03   49.14
  -7  -3   0    2.18   14.43
  -7  -3   0   31.80   24.36
   7   3   1 3088.54  140.65
  -7   3  -1 2982.70  190.65
  -7   3  -1 3211.23  183.15
  -7  -3  -1 3007.75  148.87
   7   3   2  570.38   35.05
   7   3   2  570.45   61.88
  -7   3  -2  587.55   80.21
  -7   3  -2  591.18   68.26
  -7  -3  -2  508.05   49.09
   7   3   3  299.92   49.98
  -7   3  -3  309.17   56.44
   7  -3   3  333.30   54.84
  -7  -3  -3  306.95   30.09
   7   3   4 1504.53  137.82
  -7   3  -4 1477.50  146.00
   7  -3   4 1405.76  102.02
  -7  -3  -4 1325.43   73.91
   7   3   5 1601.50  107.51
  -7   3  -5 1801.91  121.35
   7  -3   5 1864.57  118.97
  -7  -3  -5 1836.50  109.73
  -7   3  -6 1828.50  118.59
   7   3   6 1799.78   95.55
   7   3   6 1840.86  115.75
   7  -3   6 2018.23  165.26
  -7  -3  -6 1928.68   92.20
  -7   3  -7 2374.37  174.40
   7   3   7 2377.92  139.83
   7   3   7 2205.27  171.73
   7  -3   7 2509.29  148.70
  -7  -3  -7 2441.33  112.44
  -7   3  -8  929.70   65.90
   7   3   8  939.70   59.17
   7   3   8  933.78   72.30
   7  -3   8 1041.71   79.64
  -7  -3  -8  734.72   60.72
   7   3   9  882.26   66.56
   7  -3   9 1020.47  117.63
  -7  -3  -9  742.72   40.97
  -7   4  14  539.15   52.55
   7  -4 -14  584.53   48.16
  -7  -4  14  686.77   54.49
  -7  -4  14  639.62   68.18
  -7   4  13  833.93   71.60
   7  -4 -13  746.77   58.99
  -7  -4  13  760.04   99.77
  -7  -4  13  715.58   55.70
  -7   4  12   10.79   31.81
   7  -4 -12   56.34   45.00
  -7  -4  12   28.46   50.34
  -7  -4  12   36.90   23.49
   7   4 -11 1745.28   86.08
  -7   4  11 2114.59  135.88
   7  -4 -11 1982.05  121.17
  -7  -4  11 2041.80  128.24
  -7  -4  11 1842.81  108.99
   7   4 -10  983.84   58.27
  -7   4  10 1094.81   94.50
   7  -4 -10  898.44   80.58
  -7  -4  10  953.10   85.48
  -7  -4  10  967.69   71.74
   7   4  -9 2825.89  137.25
   7  -4  -9 2417.71  145.12
  -7  -4   9 2496.89  154.60
  -7  -4   9 2467.89  139.04
   7   4  -8  206.92   34.34
  -7   4   8  210.99   54.96
   7  -4  -8  225.06   43.41
  -7  -4   8  220.63   50.72
  -7  -4   8  204.88   63.71
   7   4  -7  576.35   51.78
  -7   4   7  561.87   75.84
   7  -4  -7  598.25   58.23
  -7  -4   7  621.57   69.68
  -7  -4   7  622.73   85.00
   7   4  -6 5254.93  256.65
  -7   4   6 5463.13  300.78
  -7   4   6 5061.98  242.49
   7  -4  -6 5001.95  252.21
  -7  -4   6 4977.15  264.31
  -7  -4   6 5275.68  264.45
   7   4  -5 1420.83   86.98
  -7   4   5 1460.17  113.70
  -7   4   5 1441.95   81.57
   7  -4  -5 1327.86   78.16
  -7  -4   5 1349.95  130.76
  -7  -4   5 1299.88   86.98
   7   4  -4  299.93   43.16
  -7   4   4  276.93  100.42
  -7   4   4  286.46   38.25
   7  -4  -4  293.14   30.00
  -7  -4   4  313.10   44.53
  -7  -4   4  292.28   44.43
   7   4  -3  556.61   32.27
   7   4  -3  630.25   56.25
  -7   4   3  620.36   79.63
  -7   4   3  658.12   85.33
   7  -4  -3  630.42   50.36
  -7  -4   3  649.79   52.65
  -7  -4   3  664.09   88.31
   7   4  -2  260.26   21.79
   7   4  -2  294.67   40.58
  -7   4   2  251.41   60.74
  -7   4   2  281.23   74.45
  -7  -4   2  323.40   35.15
  -7  -4   2  326.08   42.97
   7   4  -1  924.35   87.45
  -7   4   1  835.05   91.19
  -7   4   1  958.48   77.89
  -7  -4   1  840.26   68.21
  -7  -4   1  820.15   45.16
  -7  -4   1  808.57   65.97
   7   4   0 1743.82   93.62
  -7   4   0 1688.35  189.88
  -7   4   0 1774.17  120.66
  -7  -4   0 1987.51   91.60
  -7  -4   0 1836.58  108.65
   7   4   1 1086.89   63.42
   7   4   1 1091.16   79.59
  -7   4  -1 1099.68  106.03
  -7   4  -1 1109.28   94.31
  -7  -4  -1 1161.15   61.27
   7   4   2 1416.99   90.71
   7   4   2 1319.96   89.30
  -7   4  -2 1264.82  117.44
  -7   4  -2 1380.75  106.34
  -7  -4  -2 1336.60   93.90
   7   4   3  339.57   25.88
  -7   4  -3  384.94   95.58
  -7  -4  -3  328.93   35.81
   7   4   4  614.48   90.85
  -7   4  -4  670.88   77.43
   7  -4   4  602.44   67.46
  -7  -4  -4  587.74   48.51
   7   4   5 1102.22   77.62
  -7   4  -5 1141.01   94.01
   7  -4   5  873.23   78.41
  -7  -4  -5  827.60   59.90
   7   4   6 2052.50  120.28
  -7   4  -6 2137.16  134.54
   7  -4   6 2380.97  173.92
  -7  -4  -6 2217.41  134.99
   7   4   7 1210.84  115.13
  -7   4  -7 1294.89   96.38
   7  -4   7 1314.00   91.56
  -7  -4  -7 1267.81   65.67
   7   4   8  338.76   43.33
  -7   4  -8  345.92   44.18
   7  -4   8  377.10   48.35
  -7  -4  -8  329.25   29.13
  -7   5  13  303.92   50.51
   7  -5 -13  409.96   44.15
  -7  -5  13  475.72   84.04
  -7  -5  13  303.05   27.27
  -7   5  12  152.52   43.98
   7  -5 -12  118.76   59.44
  -7  -5  12  138.03   67.15
  -7  -5  12  113.20   22.57
  -7   5  11   87.65   42.68
   7  -5 -11   78.84   35.36
  -7  -5  11   96.19   38.17
  -7  -5  11   74.33   22.05
   7   5 -10  830.95   60.61
  -7   5  10 1038.73   95.75
   7  -5 -10  899.40   77.56
  -7  -5  10  913.76   83.73
  -7  -5  10  909.90   60.23
   7   5  -9 2731.42  152.39
   7  -5  -9 2471.74  149.73
  -7  -5   9 2682.77  159.81
  -7  -5   9 2725.90  140.49
   7   5  -8  431.48   42.71
  -7   5   8  437.53   74.84
   7  -5  -8  543.98   57.69
  -7  -5   8  541.62   65.29
  -7  -5   8  584.80   47.82
   7   5  -7 8419.80  413.65
  -7   5   7 8631.22  470.56
   7  -5  -7 7744.46  407.37
  -7  -5   7 8333.32  434.18
  -7  -5   7 8119.09  412.22
   7   5  -6 3285.82  149.10
   7   5  -6 3377.68  170.75
   7  -5  -6 3391.18  175.76
  -7  -5   6 3746.44  239.15
  -7  -5   6 3276.06  165.56
   7   5  -5 1391.86   81.45
   7   5  -5 1389.41  122.46
  -7   5   5 1348.40  123.55
   7  -5  -5 1524.08   84.35
  -7  -5   5 1618.96   90.18
   7   5  -4 3936.77  179.46
   7   5  -4 4108.38  245.17
  -7   5   4 3872.28  304.39
  -7   5   4 3926.17  195.47
   7  -5  -4 3915.10  186.26
  -7  -5   4 4186.72  210.16
  -7  -5   4 4181.39  232.65
   7   5  -3 2270.20  107.51
   7   5  -3 2297.23  161.58
  -7   5   3 2351.92  165.26
  -7   5   3 2447.82  132.64
  -7  -5   3 2552.76  129.73
  -7  -5   3 2403.49  124.69
   7   5  -2  277.11   26.54
   7   5  -2  259.41   41.70
  -7   5   2  289.94   65.37
  -7   5   2  269.30   41.56
  -7  -5   2  278.28   31.82
  -7  -5   2  291.69   37.66
   7   5  -1 1215.81   77.55
  -7   5   1 1220.25  110.53
  -7   5   1 1314.63   93.79
  -7  -5   1 1266.41   77.47
   7   5   0  884.44   61.22
   7   5   0  836.17   61.80
  -7   5   0  834.04  148.46
  -7   5   0  874.28   79.03
  -7  -5   0  961.82   57.27
   7   5   1 2555.06  153.97
   7   5   1 2359.72  126.01
  -7   5  -1 2360.39  165.40
  -7   5  -1 2378.37  194.81
  -7  -5  -1 2631.92  127.64
   7   5   2 1056.33   61.24
   7   5   2 1070.96   72.35
  -7   5  -2 1045.91  103.34
  -7   5  -2 1101.02  144.60
  -7  -5  -2 1152.20   68.28
  -7   5  -3 2131.63  144.77
   7   5   3 1960.83   96.52
   7   5   3 2025.77  140.17
   7  -5   3 2078.24  126.48
  -7  -5  -3 1968.35  130.22
  -7   5  -4 1121.60   98.29
   7   5   4  951.64   60.74
   7   5   4 1047.35   68.79
   7  -5   4  941.72   78.41
  -7  -5  -4  876.22   63.42
   7   5   5 1559.06   91.84
  -7   5  -5 1610.15  118.43
   7  -5   5 1707.79  104.10
  -7  -5  -5 1654.79   93.25
   7   5   6  418.84   69.83
  -7   5  -6  509.42   69.24
   7  -5   6  520.24   91.01
  -7  -5  -6  507.72   65.68
   7   5   7 1105.10   68.53
  -7   5  -7 1123.86   88.21
   7  -5   7 1192.94   79.80
  -7  -5  -7 1073.75   59.74
  -7   6  12  388.97   61.82
   7  -6 -12  316.13   79.60
  -7  -6  12  700.66   96.91
  -7   6  11   63.26   42.45
   7  -6 -11   82.63   33.80
  -7  -6  11  119.68   63.21
  -7   6  10 1595.94  120.81
   7  -6 -10 1390.66   95.22
  -7  -6  10 1411.27  101.28
   7   6  -9  684.93   38.89
   7   6  -9  654.34   41.30
  -7   6   9  795.38   86.57
   7  -6  -9  788.98   67.30
  -7  -6   9  820.45   72.74
   7   6  -8 2274.94  108.23
   7   6  -8 2301.58  113.84
  -7   6   8 2398.04  162.88
   7  -6  -8 2347.30  134.11
  -7  -6   8 2545.46  146.23
   7   6  -7 3452.61  161.27
   7   6  -7 3538.84  169.59
  -7   6   7 3576.58  217.77
   7  -6  -7 3061.51  167.00
  -7  -6   7 3573.41  229.86
   7   6  -6  394.97   44.70
   7   6  -6  403.57   41.13
   7  -6  -6  257.89   36.99
  -7  -6   6  303.52   68.21
   7   6  -5   51.93   18.39
   7   6  -5   53.56   27.97
  -7   6   5   26.41   83.81
   7  -6  -5  106.13   21.68
  -7  -6   5  131.52   28.77
   7   6  -4 1618.46   80.41
   7   6  -4 1544.41   92.81
  -7   6   4 1575.94  126.78
   7  -6  -4 1391.09   70.16
  -7  -6   4 1472.68   77.82
   7   6  -3 1341.88   72.97
   7   6  -3 1303.83   85.04
  -7   6   3 1282.00  114.65
  -7   6   3 1299.92   94.27
  -7  -6   3 1449.54   75.95
   7   6  -2 1951.42   97.83
   7   6  -2 1927.51  110.99
  -7   6   2 2010.86  145.47
  -7   6   2 1997.32  143.97
   7   6  -1 1730.43  101.41
   7   6  -1 1614.74   85.34
  -7   6   1 1685.71  183.55
  -7   6   1 1784.86  109.03
  -7  -6   1 1931.34   99.87
   7   6   0  639.32   80.96
   7   6   0  631.07   44.55
  -7   6   0  665.21   82.56
  -7   6   0  702.87   68.68
  -7  -6   0  725.29   50.97
   7   6   1 1704.12   94.58
   7   6   1 1601.04   85.36
  -7   6  -1 1659.36  124.40
  -7   6  -1 1742.65  116.21
  -7  -6  -1 1657.91   89.97
   7   6   2  637.03   48.31
   7   6   2  711.29   65.04
  -7   6  -2  616.52   78.67
  -7   6  -2  653.99   74.93
  -7  -6  -2  720.24   51.99
  -7   6  -3  773.61   81.41
   7   6   3  755.12   47.51
   7   6   3  709.16   48.95
[truncated: 64,995 more chars]
